# Supplementary material for: Sufficient driving force for quinoidal isoindigo-based diradicaloids with tunable diradical characters
Source: Royal Society of Chemistry journal article supplement (doi:10.1039/d3cp05199d), 2023-12-13
Supplement: d3cp05199d1.pdf [file d3cp05199d1.pdf]

*Electronic supplementary information for*

## **Sufficient driving force for quinoidal isoindigo-based diradicaloids with tunable diradical characters**

Li shen\*, Xiaobo Gao, Zhanqing Chang, Changhao Zhang, Yue Li, Jitao Lu, Qingguo Meng, Qian Wu\*

College of Chemical Engineering and Environmental Chemistry, Weifang University, Weifang, 261061, China.

To whom correspondence should be addressed: [shenliren93@wfu.edu.cn](mailto:shenliren93@wfu.edu.cn), [qianwu@wfu.edu.cn](mailto:qianwu@wfu.edu.cn)

## Contents

1. Evaluation of the different functionals in calculating the open-shell character of t-Bu-S2IID (Table S1).
2. Mulliken electronegativity ( $\chi$ ) of different terminal end groups (Table S2).
3. Effect of quinoidalization of IID core on HOMO, LUMO energy levels and HLGs (Fig. S1).
4. HOMO, LUMO energy levels of SnIID and SnIIDT in the CS and OS structures (Fig. S2).
5. Bond lengths of the highlight backbone of SnIID core, and BLA of SnIID and SnIIDT in the CS and OS structures (Fig. S3, S4 and S5).
6. Correlations between diradical character  $\gamma_0$  and BLA, total HOMA and total NICS(1)zz for SnIIDT in the OS structures. (Fig. S6)
7. Spin density distributions of SnIIDT, S2IIDS<sub>n</sub>, S2TIIDTS<sub>n</sub> and S9TIIDTS<sub>n</sub> in the OS and T states (Fig. S7, S8, S9 and S10).
8.  $\Delta E(\text{OS-CS})$ ,  $\Delta E(\text{OS-T}_1)$  and diradical character  $\gamma_0$  of S2IID, S2IIDT, S2FIID, S2FIIDT, S2TIID, S2TIIDT with the dihedral angle ( $\varphi$ ) fixed at the specific values (Table S3).
9. HOMO, LUMO energy levels and HLGs,  $\Delta E(\text{OS-CS})$ ,  $\Delta E(\text{OS-T}_1)$ , diradical character  $\gamma_0$  and  $N^{\text{FOD}}$  of symmetric and asymmetric quinoidal isoindigo systems (Table S4, S5, S6, S7, S10, S11 and S13).
10. Calculated HOMA and NICS(1)zz of the quinoidal IID and IIDT in the CS and OS states (Table S8 and S9).
11. Calculated Hirshfeld charges and dipole moments of asymmetric quinoidal isoindigo systems in the OS states (Table S12 and S14).
12. Coordinates and energies of the computed molecules.

**Table S1** The calculated  $\Delta E(\text{OS-T}_1)$  (kcal mol<sup>-1</sup>), diradical character  $y_0$ , spin-squared values of broken-symmetry (BS) open-shell singlet ( $\langle S_{\text{OS}}^2 \rangle$ ) and triplet state ( $\langle S_{\text{T}1}^2 \rangle$ ) of *t*-Bu-S2IID using different functionals and 6-31G(d,p) basis set.

| Functional     | $\Delta E(\text{OS-T}_1)$ | $y_0$ | $\langle S_{\text{OS}}^2 \rangle$ | $\langle S_{\text{T}1}^2 \rangle$ |
|----------------|---------------------------|-------|-----------------------------------|-----------------------------------|
| BLYP           | -4.207                    | 0     | 0                                 | 2.016                             |
| B3LYP          | -1.150                    | 0.574 | 1.055                             | 2.060                             |
| B3LYP-GD3BJ    | -1.230                    | 0.555 | 1.050                             | 2.059                             |
| PBE1PBE        | -1.143                    | 0.657 | 1.123                             | 2.086                             |
| BHandHLYP      | -1.427                    | 0.819 | 1.415                             | 2.217                             |
| M06-2X         | -0.403                    | 0.854 | 1.082                             | 2.067                             |
| CAM-B3LYP      | -0.661                    | 0.871 | 1.193                             | 2.124                             |
| $\omega$ B97XD | -0.442                    | 0.910 | 1.149                             | 2.105                             |

**Table S2.** The calculated Mulliken electronegativity ( $\chi$ ) of different terminal end groups at the theoretical level of (U)B3LYP/6-31G(d,p).

|        |       |       |       |       |       |       |
|--------|-------|-------|-------|-------|-------|-------|
|        | S1    | S2    | S3    | S4    | S5    | S6    |
| $\chi$ | 6.120 | 5.060 | 5.563 | 4.915 | 5.822 | 5.066 |
|        | S7    | S8    | S9    | S10   |       |       |
| $\chi$ | 5.695 | 5.990 | 3.322 | 3.033 |       |       |

(a)

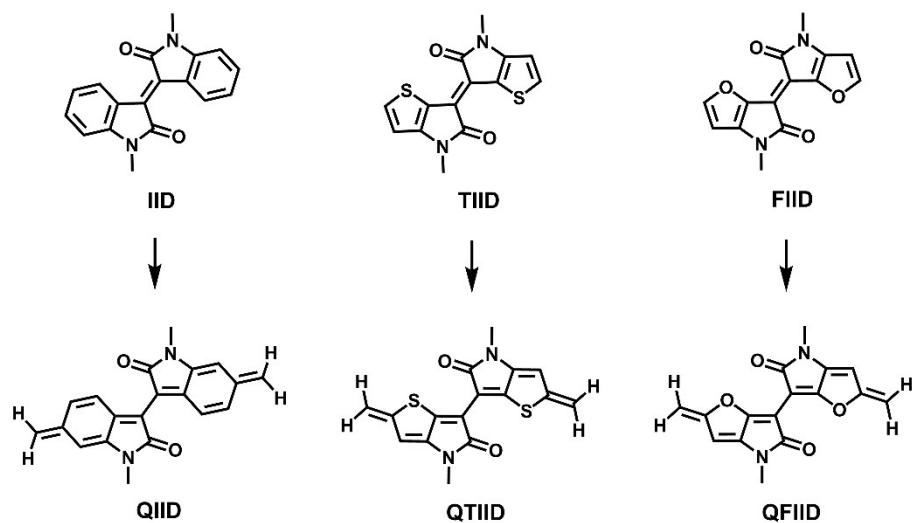

(b)

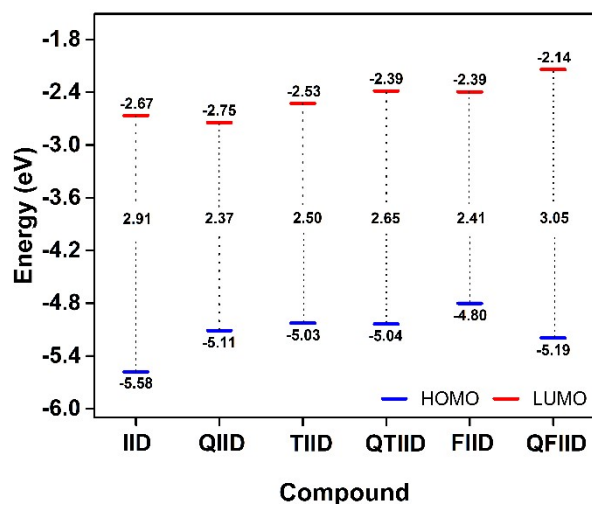

**Fig. S1** Comparison between aromatic and quinoidalized IID cores: (a) molecular structures; (b) HOMO, LUMO energy levels and the corresponding HLGs (eV)

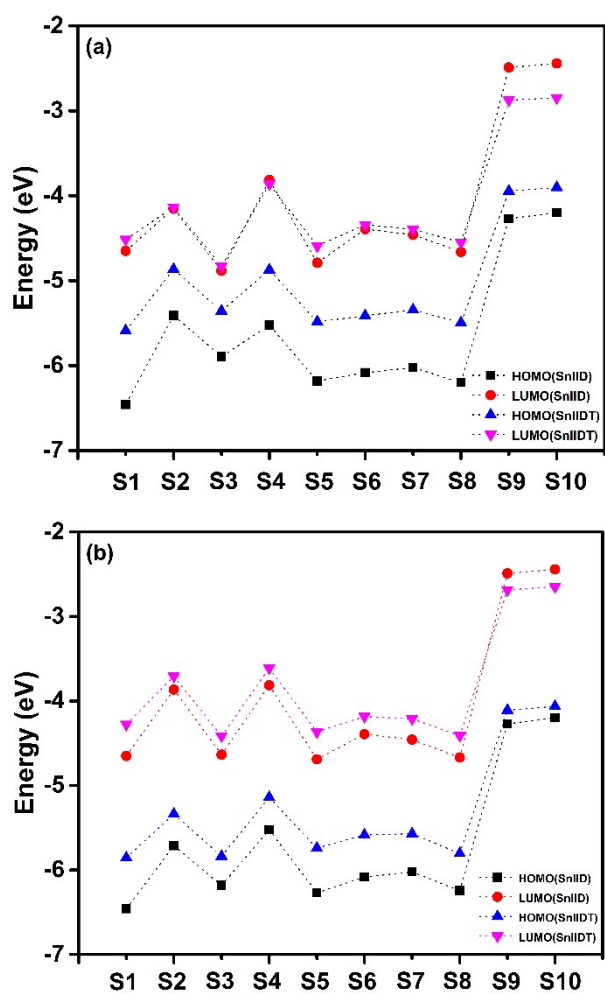

Fig. S2 HOMO, LUMO energy levels of SnIID and SnIIDT in the (a) CS and (b) OS structures.

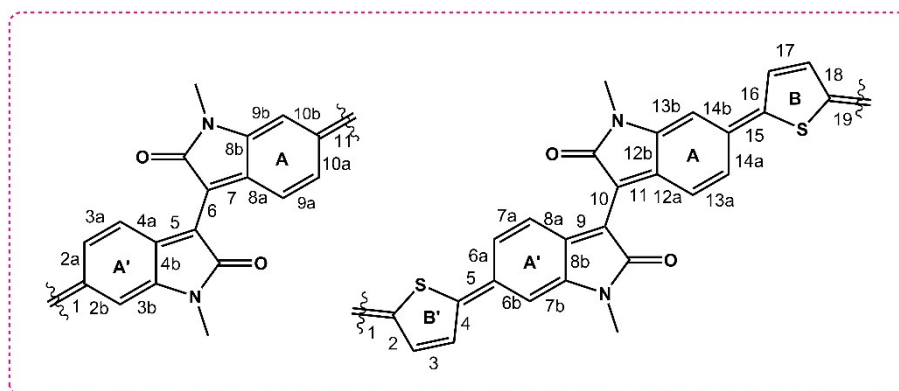

Fig. S3 Bond indexes and ring labels of quinoial IID and IIDT cores.  $r_i = (r_{ia} + r_{ib})/2$

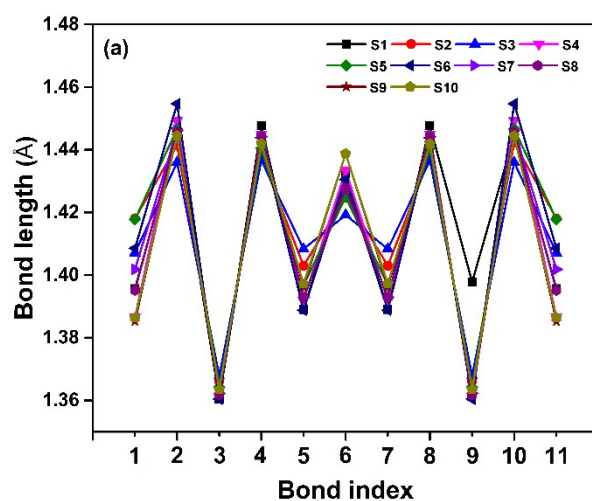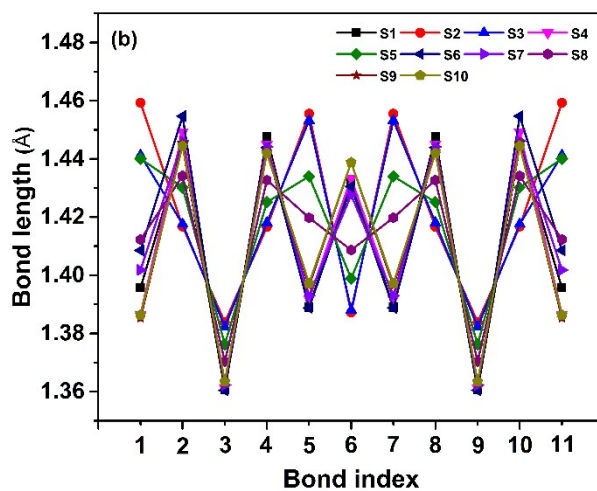

Fig. S4 Bond lengths of the highlight backbone of SnIID core in the (a) CS and (b) OS structures.

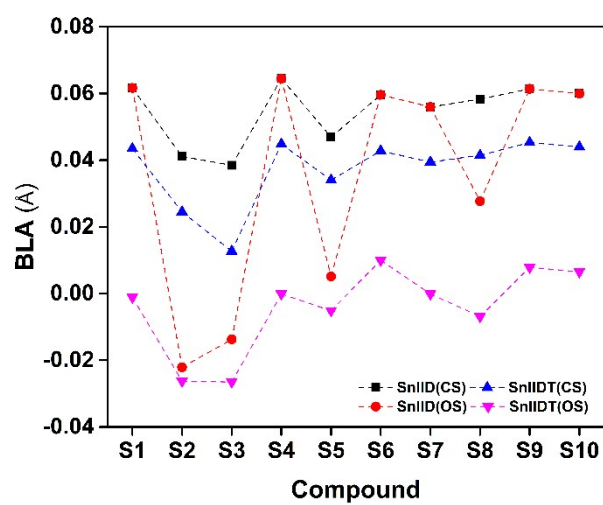

Fig. S5 BLA values of SnIID and SnIIDT compounds in the CS and OS structures.

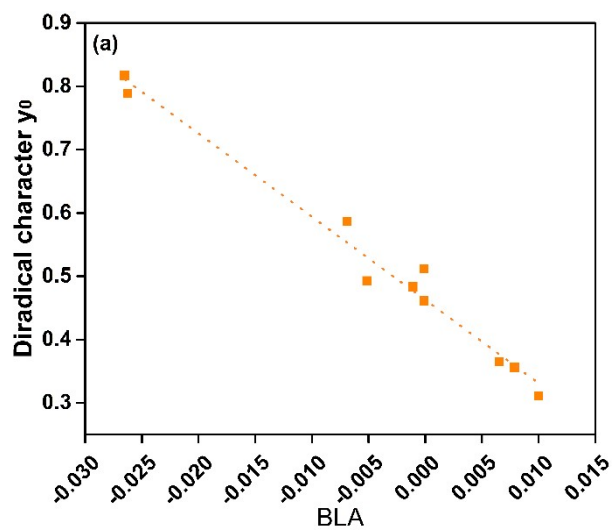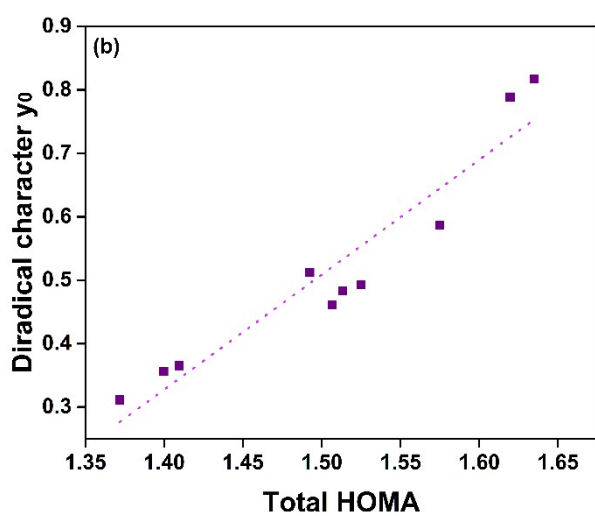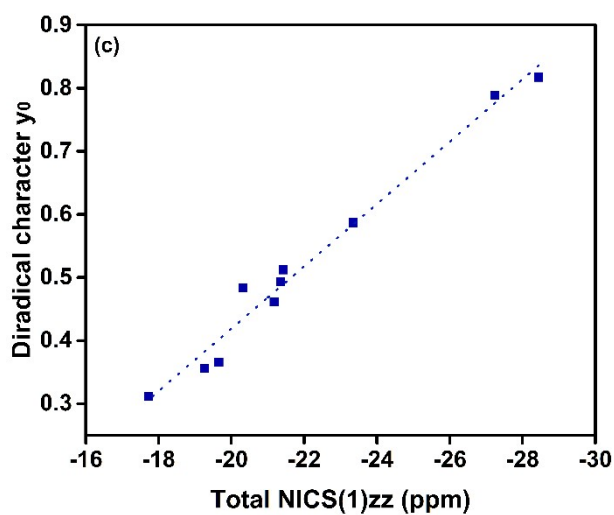

**Fig. S6** Correlations between diradical character  $y_0$  and (a) BLA, (b) total HOMA and (c) total NICS(1)zz for SnIIDT in the OS structures.

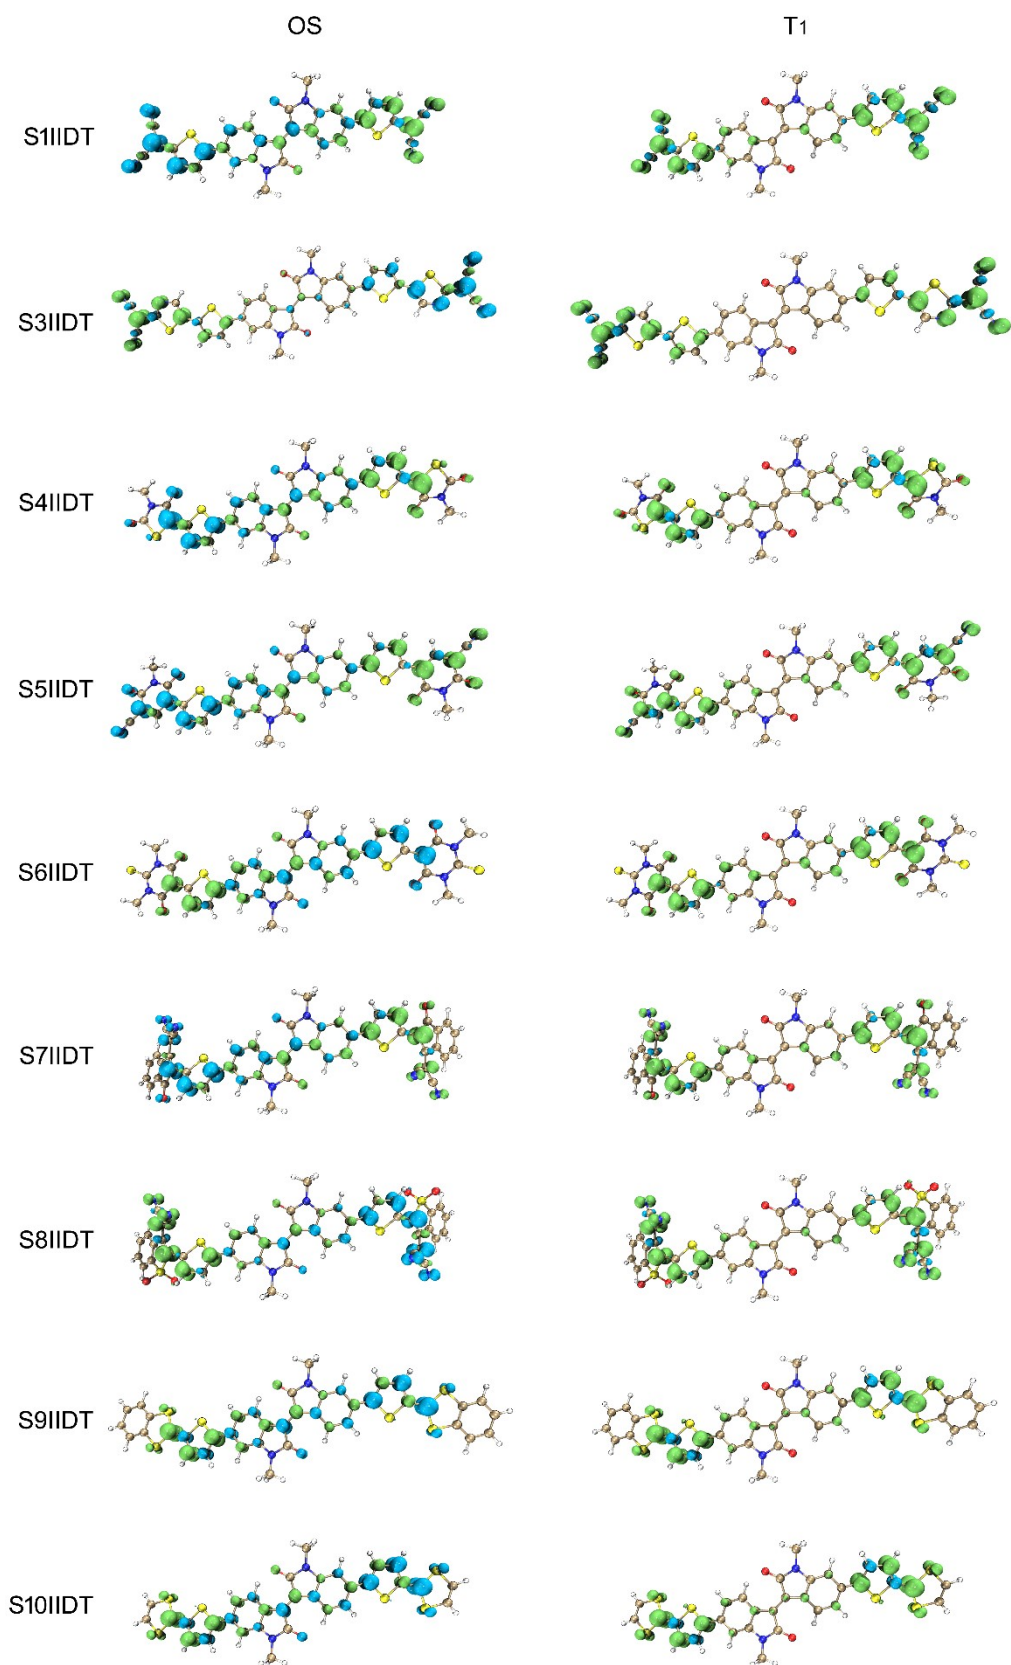

**Fig. S7** Spin density distributions of SnIIDT in the OS and T<sub>1</sub> states (isovalue = 0.005 e-bohr<sup>-3</sup>)



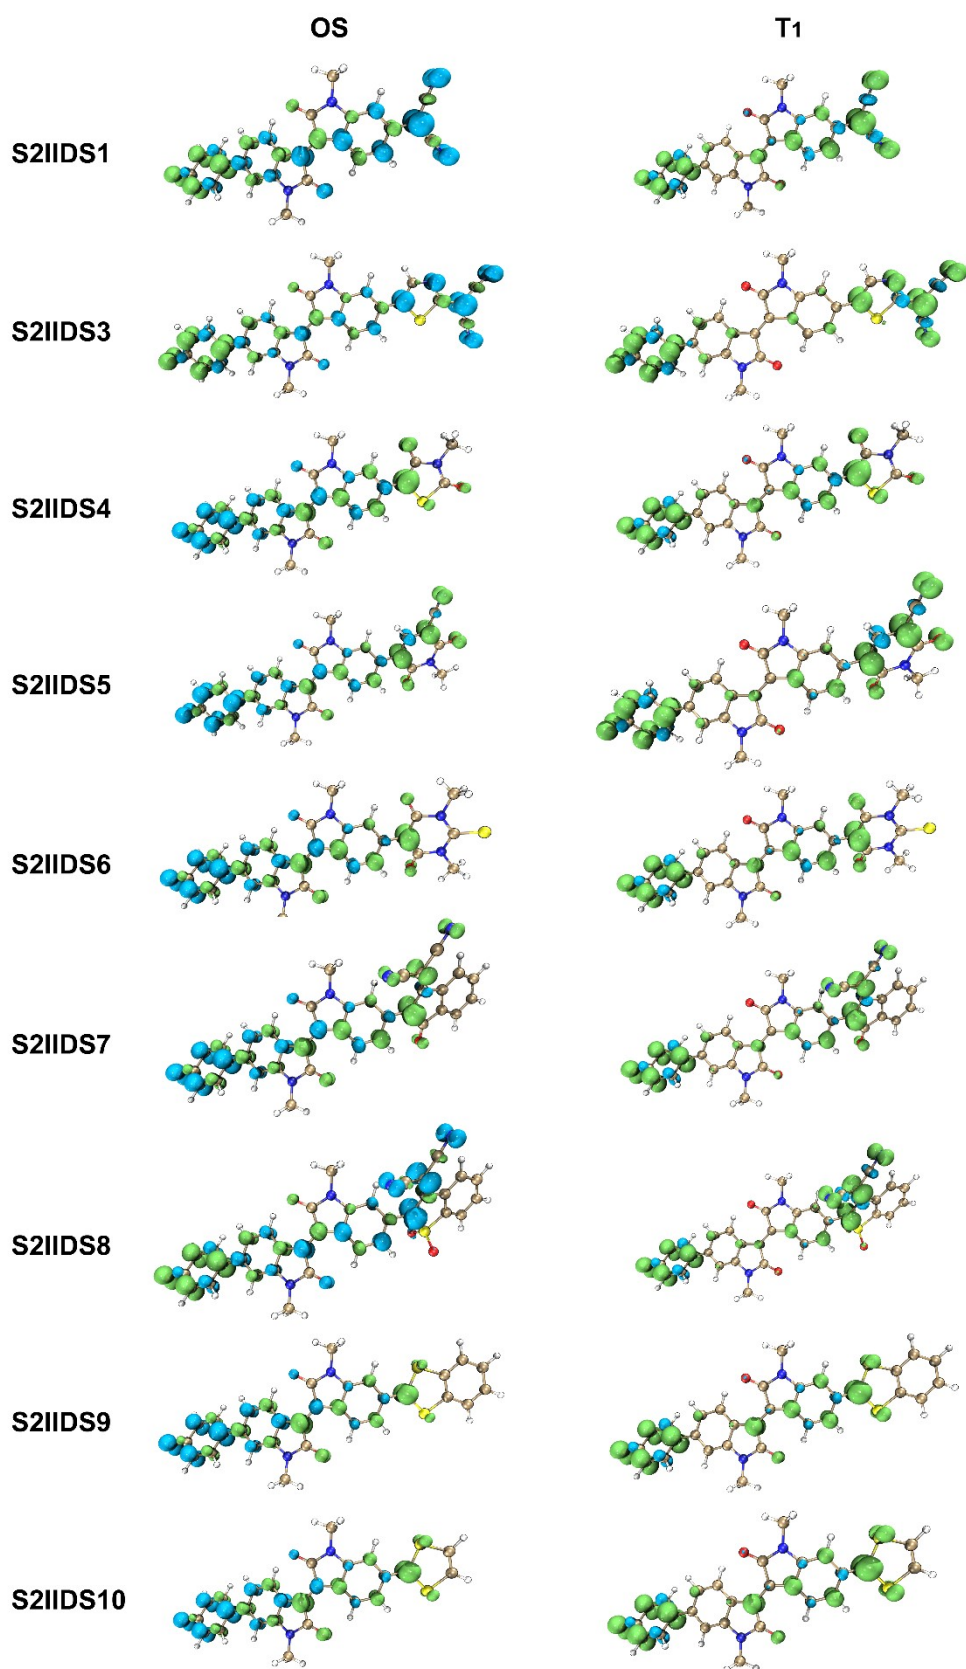

**Fig. S8** Spin density distributions of S2IIDS<sub>n</sub> in the OS and T<sub>1</sub> states (isovalue = 0.005 e·bohr<sup>-3</sup>)

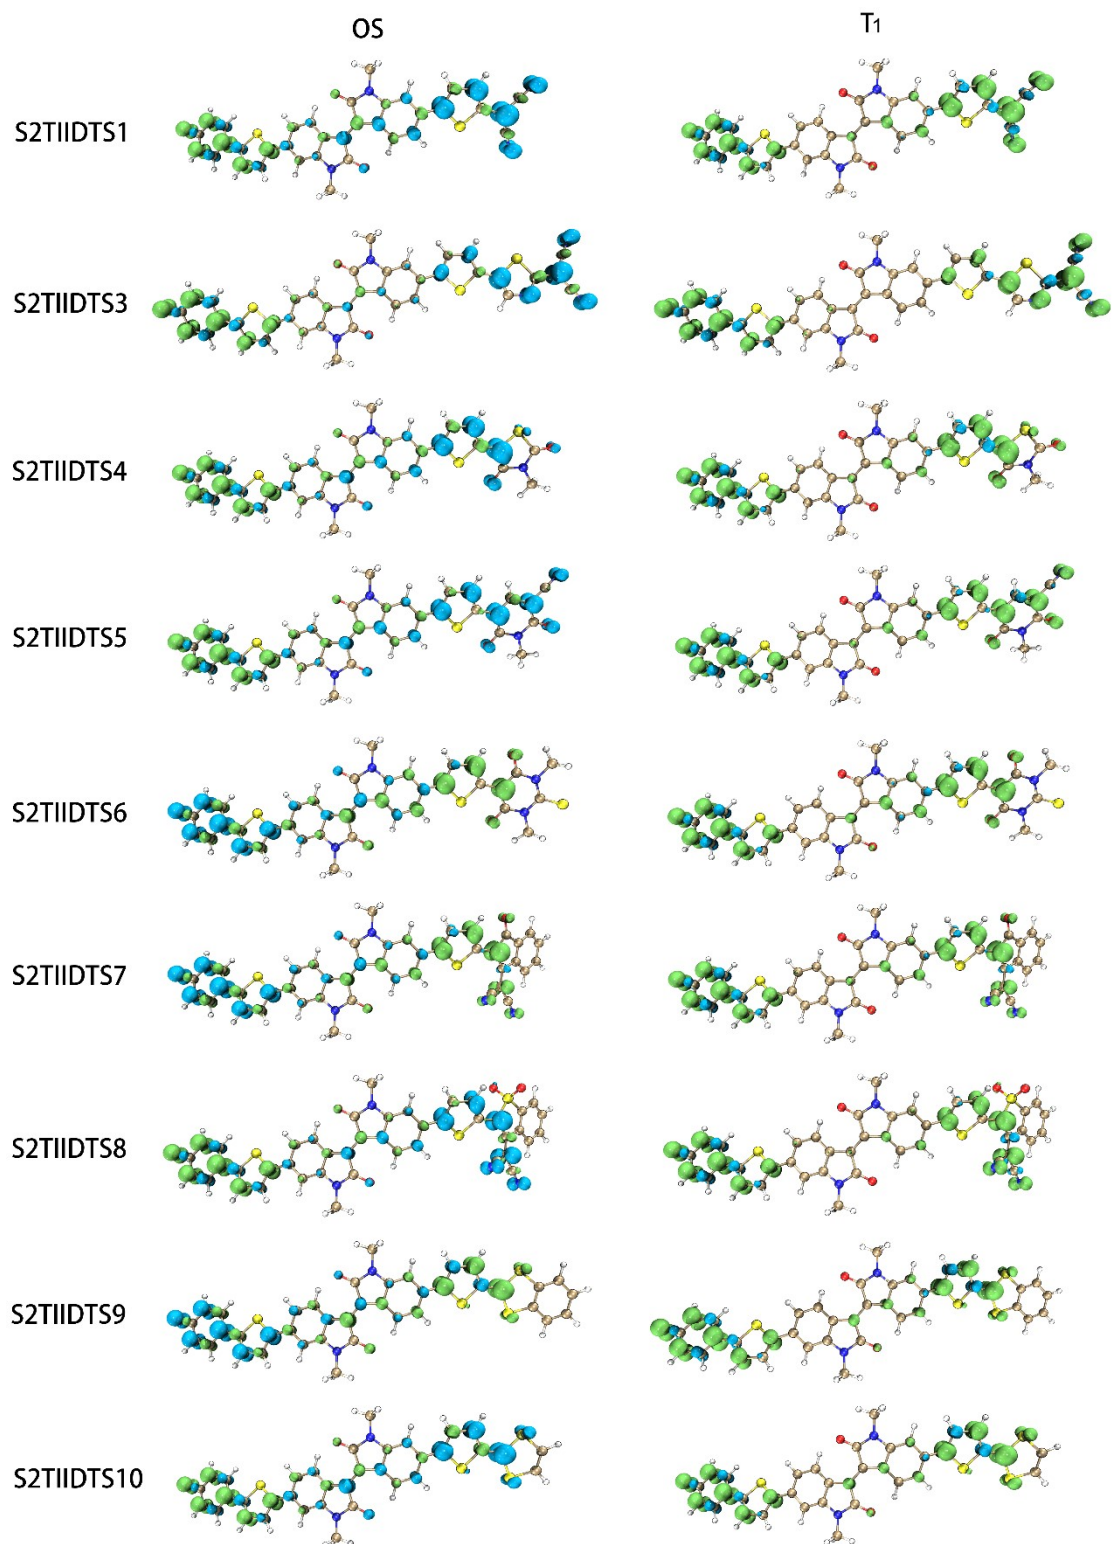

Fig. S9 Spin density distributions of S2TIIDTS<sub>n</sub> in the OS and T<sub>1</sub> states (isovalue = 0.005 e-bohr<sup>-3</sup>)

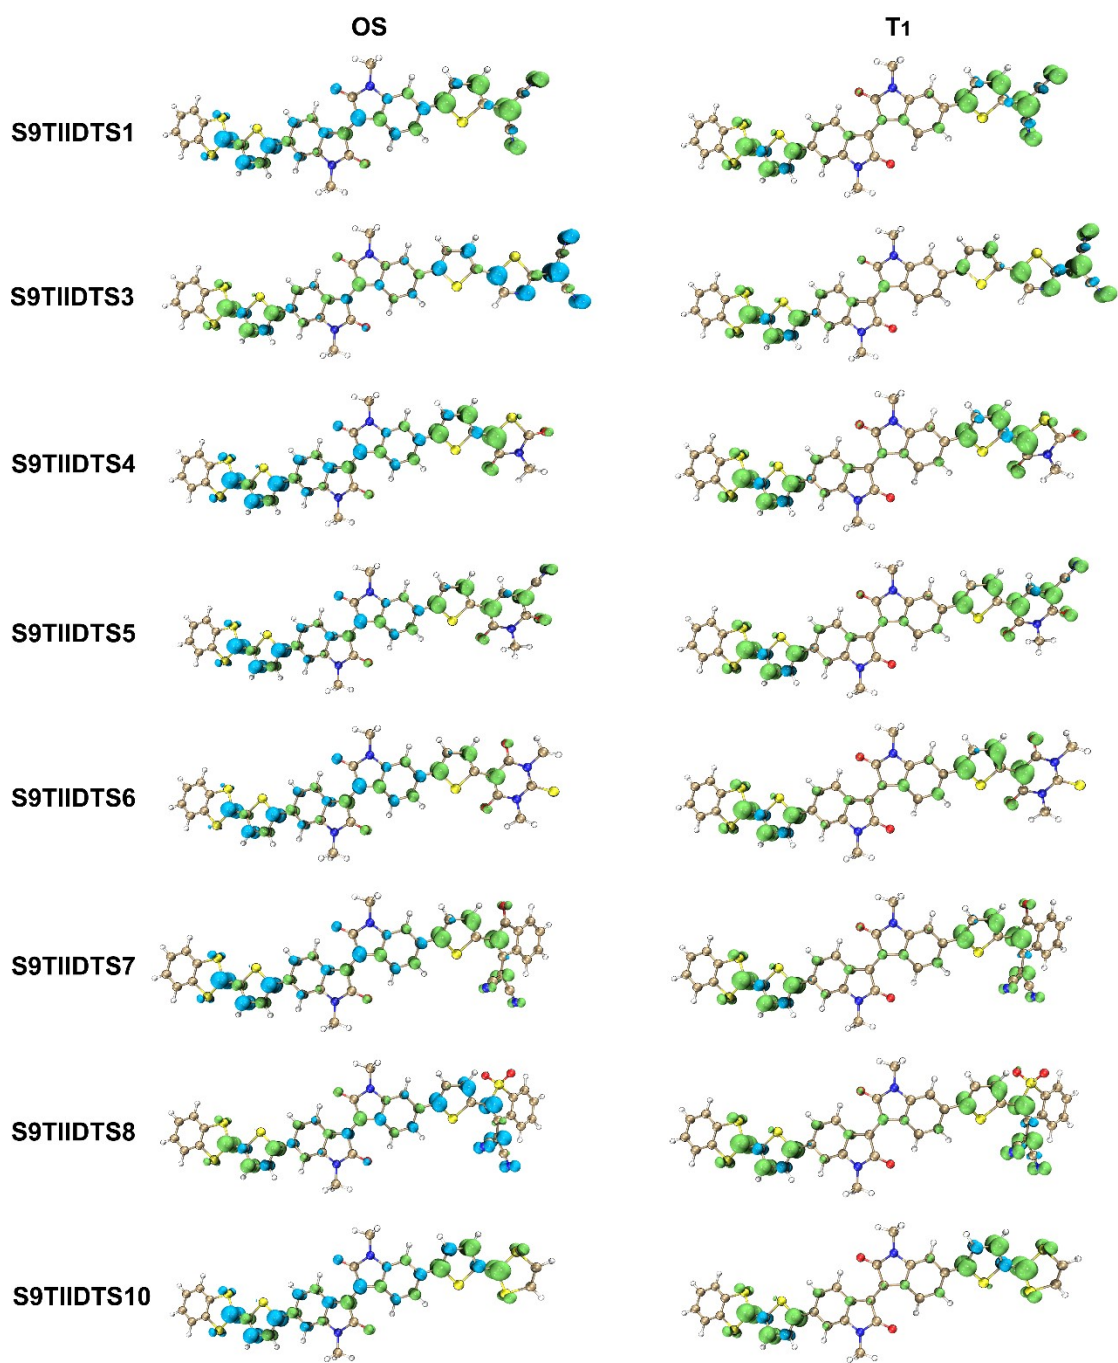

Fig. S10 Spin density distributions of S9TIIDTS<sub>n</sub> in the OS and T<sub>1</sub> states (isovalue = 0.005 e-bohr<sup>-3</sup>)

**Table S3.**  $\Delta E(\text{OS-CS})$ ,  $\Delta E(\text{OS-T}_1)$  and diradical character  $y_0$  of S2IID, S2IIDT, S2FIID, S2FIIDT, S2TIID, S2TIIDT with the dihedral angle ( $\varphi$ ) fixed at the specific values.

| Molecule | $\varphi$          | $\Delta E(\text{OS-CS})$ | $\Delta E(\text{OS-T}_1)$ | $y_0$ |
|----------|--------------------|--------------------------|---------------------------|-------|
| S2IID    | 0°                 | -6.907                   | -1.048                    | 0.621 |
|          | 13.7° <sup>a</sup> | -5.529                   | -1.179                    | 0.587 |
|          | 30°                | -3.750                   | -2.016                    | 0.428 |
|          | 60°                | -0.211                   | -8.257                    | 0.017 |
| S2IIDT   | 0°                 | -10.546                  | -0.350                    | 0.797 |
|          | 12.2° <sup>a</sup> | -9.786                   | -0.381                    | 0.789 |
|          | 30°                | -7.888                   | -0.663                    | 0.715 |
|          | 60°                | -2.880                   | -5.097                    | 0.256 |
| S2FIID   | 0° <sup>a</sup>    | 0                        | -16.033                   | 0     |
|          | 30°                | 0                        | -19.712                   | 0     |
|          | 60°                | 0                        | -23.064                   | 0     |
| S2FIIDT  | 0° <sup>a</sup>    | -0.145                   | -5.873                    | 0.018 |
|          | 30°                | 0                        | -8.931                    | 0     |
|          | 60°                | 0                        | -12.036                   | 0     |
| S2TIID   | 0° <sup>a</sup>    | 0                        | -11.763                   | 0     |
|          | 30°                | 0                        | -16.053                   | 0     |
|          | 60°                | 0                        | -25.545                   | 0     |
| S2TIIDT  | 0° <sup>a</sup>    | -1.023                   | -3.611                    | 0.146 |
|          | 30°                | -0.149                   | -6.643                    | 0.017 |
|          | 60°                | 0                        | -14.994                   | 0     |

<sup>a</sup> In contrast to other fixed dihedral angles, the dihedral angles correspond to that of OS structure with full optimization as references, and the corresponding  $\Delta E(\text{OS-CS})$ ,  $\Delta E(\text{OS-T}_1)$  are also obtained by the full optimized OS, CS and T<sub>1</sub> structures.

**Table S4.** HOMO, LUMO energy levels and HLGs,  $\Delta E(\text{OS-CS})$ ,  $\Delta E(\text{OS-T}_1)$ , diradical character  $y_0$  and  $N^{\text{FOD}}$  of SnTIID and SnTIIDT.

| Compound | HOMO <sup>a</sup> | LUMO <sup>a</sup> | HLG <sup>a</sup> | $\Delta E(\text{OS-CS})^b$ | $\Delta E(\text{OS-T}_1)^b$ | $y_0$ | $N^{\text{FOD}}$ |
|----------|-------------------|-------------------|------------------|----------------------------|-----------------------------|-------|------------------|
| S1TIID   | -6.452            | -4.234            | 2.218            | 0                          | -20.931                     | 0     | 1.017            |
| S2TIID   | -5.476            | -3.732            | 1.744            | 0                          | -11.763                     | 0     | 1.631            |
| S3TIID   | -5.998            | -4.512            | 1.486            | 0                          | -9.178                      | 0     | 1.742            |
| S4TIID   | -5.497            | -3.394            | 2.103            | 0                          | -19.983                     | 0     | 1.153            |
| S5TIID   | -6.230            | -4.353            | 1.877            | 0                          | -16.918                     | 0     | 1.541            |
| S6TIID   | -6.040            | -3.992            | 2.048            | 0                          | -21.676                     | 0     | 1.667            |
| S7TIID   | -5.997            | -4.041            | 1.956            | 0                          | -19.217                     | 0     | 1.686            |
| S8TIID   | -6.152            | -4.162            | 1.989            | 0                          | -17.533                     | 0     | 1.479            |
| S9TIID   | -4.386            | -2.229            | 2.157            | 0                          | -21.819                     | 0     | 1.147            |
| S10TIID  | -4.309            | -2.183            | 2.125            | 0                          | -21.267                     | 0     | 1.121            |
| S1TIIDT  | -5.704            | -4.159            | 1.546            | 0                          | -10.008                     | 0     | 1.663            |
| S2TIIDT  | -5.017            | -3.780            | 1.238            | -1.023                     | -3.611                      | 0.146 | 2.443            |
| S3TIIDT  | -5.507            | -4.457            | 1.051            | -1.497                     | -2.686                      | 0.216 | 2.575            |
| S4TIIDT  | -5.008            | -3.527            | 1.481            | 0                          | -9.044                      | 0     | 1.808            |
| S5TIIDT  | -5.637            | -4.309            | 1.328            | 0                          | -7.654                      | 0     | 2.135            |
| S6TIIDT  | -5.523            | -4.002            | 1.521            | 0                          | -11.935                     | 0     | 2.125            |
| S7TIIDT  | -5.480            | -4.060            | 1.420            | 0                          | -10.087                     | 0     | 2.235            |
| S8TIIDT  | -5.627            | -4.209            | 1.418            | 0                          | -9.114                      | 0     | 2.089            |
| S9TIIDT  | -4.112            | -2.591            | 1.522            | 0                          | -9.841                      | 0     | 1.857            |
| S10TIIDT | -4.063            | -2.559            | 1.504            | 0                          | -9.519                      | 0     | 1.828            |

<sup>a</sup> HOMO, LUMO and HLG are in eV

<sup>b</sup>  $\Delta E(\text{OS-CS})$ ,  $\Delta E(\text{OS-T}_1)$  are in kcal mol<sup>-1</sup>.

**Table S5.** HOMO, LUMO energy levels and HLGs,  $\Delta E(\text{OS-CS})$ ,  $\Delta E(\text{OS-T}_1)$ , diradical character  $y_0$  and  $N^{\text{FOD}}$  of SnFIID and SnFIIDT.

| Compound | HOMO <sup>a</sup> | LUMO <sup>a</sup> | HLG <sup>a</sup> | $\Delta E(\text{OS-CS})^b$ | $\Delta E(\text{OS-T}_1)^b$ | $y_0$ | $N^{\text{FOD}}$ |
|----------|-------------------|-------------------|------------------|----------------------------|-----------------------------|-------|------------------|
| S1FIID   | -6.610            | -4.069            | 2.541            | 0                          | -26.431                     | 0     | 0.807            |
| S2FIID   | -5.519            | -3.570            | 1.950            | 0                          | -16.033                     | 0     | 1.441            |
| S3FIID   | -6.049            | -4.385            | 1.664            | 0                          | -13.297                     | 0     | 1.562            |
| S4FIID   | -5.675            | -3.205            | 2.471            | 0                          | -25.233                     | 0     | 0.942            |
| S5FIID   | -6.342            | -4.123            | 2.219            | 0                          | -22.519                     | 0     | 1.284            |
| S6FIID   | -5.945            | -3.817            | 2.129            | 0                          | -27.890                     | 0     | 1.426            |
| S7FIID   | -6.219            | -3.907            | 2.312            | 0                          | -24.629                     | 0     | 1.450            |
| S8FIID   | -6.362            | -4.090            | 2.272            | 0                          | -23.934                     | 0     | 1.290            |
| S9FIID   | -4.377            | -2.014            | 2.363            | 0                          | -25.152                     | 0     | 1.014            |
| S10FIID  | -4.281            | -1.958            | 2.323            | 0                          | -24.402                     | 0     | 0.989            |
| S1FIIDT  | -5.755            | -4.039            | 1.716            | 0                          | -13.790                     | 0     | 1.496            |
| S2FIIDT  | -5.035            | -3.662            | 1.373            | -0.145                     | -5.873                      | 0.018 | 2.193            |
| S3FIIDT  | -5.531            | -4.352            | 1.179            | -0.336                     | -4.689                      | 0.044 | 2.359            |
| S4FIIDT  | -5.041            | -3.403            | 1.637            | 0                          | -12.521                     | 0     | 1.653            |
| S5FIIDT  | -5.678            | -4.202            | 1.476            | 0                          | -11.128                     | 0     | 1.968            |
| S6FIIDT  | -5.578            | -3.887            | 1.691            | 0                          | -15.826                     | 0     | 1.939            |
| S7FIIDT  | -5.536            | -3.958            | 1.578            | 0                          | -13.721                     | 0     | 2.068            |
| S8FIIDT  | -5.686            | -4.109            | 1.577            | 0                          | -12.722                     | 0     | 1.925            |
| S9FIIDT  | -4.114            | -2.452            | 1.662            | 0                          | -12.541                     | 0     | 1.739            |
| S10FIIDT | -4.056            | -2.415            | 1.641            | 0                          | -12.154                     | 0     | 1.709            |

<sup>a</sup> HOMO, LUMO and HLG are in eV

<sup>b</sup>  $\Delta E(\text{OS-CS})$ ,  $\Delta E(\text{OS-T}_1)$  are in kcal mol<sup>-1</sup>.

**Table S6.** HOMO, LUMO energy levels and HLGs,  $\Delta E(\text{OS-CS})$ ,  $\Delta E(\text{OS-T}_1)$ , diradical character  $y_0$  and  $N^{\text{FOD}}$  of SnIID and SnIIDT.

| Compound | HOMO <sup>a</sup> | LUMO <sup>a</sup> | HLG <sup>a</sup> | $\Delta E(\text{OS-CS})^b$ | $\Delta E(\text{OS-T}_1)^b$ | $y_0$ | $N^{\text{FOD}}$ |
|----------|-------------------|-------------------|------------------|----------------------------|-----------------------------|-------|------------------|
| S1IID    | -6.458            | -4.650            | 1.808            | 0                          | -7.477                      | 0     | 1.414            |
| S2IID    | -5.408            | -4.152            | 1.256            | -5.529                     | -1.179                      | 0.587 | 2.464            |
| S3IID    | -5.893            | -4.884            | 1.010            | -5.138                     | -1.187                      | 0.529 | 2.339            |
| S4IID    | -5.524            | -3.814            | 1.710            | 0                          | -7.043                      | 0     | 1.531            |
| S5IID    | -6.181            | -4.789            | 1.392            | -1.276                     | -2.784                      | 0.208 | 2.313            |
| S6IID    | -6.083            | -4.393            | 1.690            | 0                          | -8.552                      | 0     | 2.139            |
| S7IID    | -6.023            | -4.458            | 1.565            | 0                          | -5.681                      | 0     | 2.144            |
| S8IID    | -6.199            | -4.662            | 1.537            | -0.259                     | -3.120                      | 0.081 | 2.200            |
| S9IID    | -4.270            | -2.490            | 1.780            | 0                          | -11.029                     | 0     | 1.370            |
| S10IID   | -4.198            | -2.442            | 1.756            | 0                          | -10.676                     | 0     | 1.344            |
| S1IIDT   | -5.589            | -4.515            | 1.075            | -4.512                     | -1.435                      | 0.483 | 2.240            |
| S2IIDT   | -4.866            | -4.136            | 0.730            | -9.876                     | -0.381                      | 0.789 | 2.790            |
| S3IIDT   | -5.357            | -4.830            | 0.527            | -10.041                    | -0.242                      | 0.817 | 2.766            |
| S4IIDT   | -4.872            | -3.864            | 1.008            | -4.708                     | -1.216                      | 0.512 | 2.339            |
| S5IIDT   | -5.484            | -4.591            | 0.893            | -4.455                     | -1.175                      | 0.493 | 2.579            |
| S6IIDT   | -5.412            | -4.341            | 1.070            | -2.516                     | -2.125                      | 0.311 | 2.685            |
| S7IIDT   | -5.343            | -4.395            | 0.948            | -3.736                     | -1.272                      | 0.461 | 2.779            |
| S8IIDT   | -5.496            | -4.548            | 0.948            | -4.789                     | -0.840                      | 0.587 | 2.709            |
| S9IIDT   | -3.945            | -2.874            | 1.070            | -3.224                     | -1.999                      | 0.356 | 2.275            |
| S10IIDT  | -3.902            | -2.847            | 1.055            | -3.353                     | -1.941                      | 0.365 | 2.239            |

<sup>a</sup> HOMO, LUMO and HLG are in eV

<sup>b</sup>  $\Delta E(\text{OS-CS})$ ,  $\Delta E(\text{OS-T}_1)$  are in kcal mol<sup>-1</sup>.

**Table S7.** HOMO, LUMO energy levels and HLGs,  $\Delta E(\text{OS-CS})$ ,  $\Delta E(\text{OS-T}_1)$ , diradical character  $y_0$  and  $N^{\text{FOD}}$  of S2IIDAr.

| Compound | HOMO <sup>a</sup> | LUMO <sup>a</sup> | HLG <sup>a</sup> | $\Delta E(\text{OS-CS})^b$ | $\Delta E(\text{OS-T}_1)^b$ | $y_0$ | $N^{\text{FOD}}$ |
|----------|-------------------|-------------------|------------------|----------------------------|-----------------------------|-------|------------------|
| S2IIDB   | -4.746            | -4.432            | 0.314            | -19.095                    | -0.036                      | 0.952 | 2.985            |
| S2IIDF   | -4.802            | -4.050            | 0.752            | -11.618                    | -0.241                      | 0.732 | 2.705            |
| S2IIDT   | -4.866            | -4.136            | 0.730            | -9.786                     | -0.381                      | 0.789 | 2.790            |
| S2IIDTz  | -5.079            | -4.427            | 0.652            | -9.121                     | -0.553                      | 0.842 | 2.892            |

<sup>a</sup> HOMO, LUMO and HLG are in eV, <sup>b</sup>  $\Delta E(\text{OS-CS})$ ,  $\Delta E(\text{OS-T}_1)$  are in kcal mol<sup>-1</sup>.

**Table S8.** The values of HOMA of the quinoidal IID and IIDT in CS and OS states.

| Compound | HOMA(CS) |        |                     | HOMA(OS) |        |                     |
|----------|----------|--------|---------------------|----------|--------|---------------------|
|          | Ring A   | Ring B | Ring C <sup>a</sup> | Ring A   | Ring B | Ring C <sup>a</sup> |
| S2IID    | 0.49     |        | 0.06                | 0.85     |        | 0.41                |
| S3IID    | 0.55     |        | 0.56                | 0.83     |        | 0.70                |
| S5IID    | 0.40     |        |                     | 0.70     |        |                     |
| S8IID    | 0.36     |        |                     | 0.60     |        |                     |
| S1IIDT   | 0.54     | 0.52   |                     | 0.82     | 0.69   |                     |
| S2IIDT   | 0.66     | 0.60   | 0.10                | 0.88     | 0.74   | 0.35                |
| S3IIDT   | 0.73     | 0.67   | 0.59                | 0.88     | 0.75   | 0.67                |
| S4IIDT   | 0.57     | 0.48   |                     | 0.83     | 0.66   |                     |
| S5IIDT   | 0.59     | 0.56   |                     | 0.83     | 0.69   |                     |
| S6IIDT   | 0.53     | 0.48   |                     | 0.78     | 0.59   |                     |
| S7IIDT   | 0.57     | 0.53   |                     | 0.83     | 0.68   |                     |
| S8IIDT   | 0.57     | 0.52   |                     | 0.85     | 0.72   |                     |
| S9IIDT   | 0.57     | 0.44   |                     | 0.80     | 0.60   |                     |
| S10IIDT  | 0.58     | 0.46   |                     | 0.80     | 0.61   |                     |
| S2IIDB   | 0.84     | 0.82   | 0.27                | 0.91     | 0.92   | 0.48                |
| S2IIDF   | 0.67     | 0.20   | 0.13                | 0.87     | 0.28   | 0.35                |
| S2IIDTz  | 0.69     | 0.62   | 0.10                | 0.89     | 0.73   | 0.37                |



**Table S9.** The values of NICS(1)zz of the quinoidal IID and IIDT in CS and OS states.

| Compound | NICS(1)zz(CS) |        |                     | NICS(1)zz(OS) |        |                     |
|----------|---------------|--------|---------------------|---------------|--------|---------------------|
|          | Ring A        | Ring B | Ring C <sup>a</sup> | Ring A        | Ring B | Ring C <sup>a</sup> |
| S2IID    | -3.07         |        | -2.77               | -8.20         | -      | -4.18               |
| S3IID    | -3.16         |        | -12.95              | -7.40         |        | -14.20              |
| S5IID    | 1.90          |        |                     | -0.84         |        |                     |
| S8IID    | 4.09          |        |                     | 2.80          |        |                     |
| S1IIDT   | -3.74         | -11.50 |                     | -7.76         | -12.56 |                     |
| S2IIDT   | -6.75         | -12.65 | -3.06               | -11.89        | -15.35 | -4.06               |
| S3IIDT   | -8.00         | -13.83 | -13.33              | -12.43        | -16.02 | -14.48              |
| S4IIDT   | -4.88         | -11.00 |                     | -8.95         | -12.48 |                     |
| S5IIDT   | -4.33         | -12.02 |                     | -8.25         | -13.09 |                     |
| S6IIDT   | -3.45         | -10.78 |                     | -6.60         | -11.14 |                     |
| S7IIDT   | -4.13         | -11.94 |                     | -8.28         | -12.90 |                     |
| S8IIDT   | -3.97         | -11.79 |                     | -9.11         | -14.24 |                     |
| S9IIDT   | -6.16         | -9.15  |                     | -9.02         | -10.25 |                     |
| S10IIDT  | -6.41         | -9.28  |                     | -9.28         | -10.38 |                     |
| S2IIDB   | -12.42        | -15.26 | -3.66               | -15.36        | -18.76 | -4.80               |
| S2IIDF   | -7.58         | -11.55 | -3.73               | -11.47        | -13.19 | -4.46               |
| S2IIDTz  | -6.96         | -14.25 | -2.61               | -12.25        | -16.70 | -3.69               |

<sup>a</sup> Ring C refers to the pro-aromatic rings of S2 and S3. Ring A and B are labeled as shown in Figure S3.

**Table S10.** HOMO, LUMO energy levels and HLG values,  $\Delta E(\text{OS-CS})$ ,  $\Delta E(\text{OS-T}_1)$ , diradical character  $y_0$  of SOIIDS<sub>n</sub> and SOIIDTS<sub>n</sub>

| Compound  | HOMO <sup>a</sup> | LUMO <sup>a</sup> | HLG <sup>a</sup> | $\Delta E(\text{OS-CS})^b$ | $\Delta E(\text{OS-T}_1)^b$ | $y_0$ | $N^{\text{FOD}}$ |
|-----------|-------------------|-------------------|------------------|----------------------------|-----------------------------|-------|------------------|
| SOIIDS1   | -5.818            | -3.827            | 1.991            | 0                          | -11.381                     | 0     | 1.163            |
| SOIIDS2   | -5.270            | -3.601            | 1.670            | -0.796                     | -4.513                      | 0.097 | 1.667            |
| SOIIDS3   | -5.557            | -4.088            | 1.470            | -0.696                     | -4.873                      | 0.072 | 1.538            |
| SOIIDS4   | -5.343            | -3.389            | 1.954            | 0                          | -10.380                     | 0     | 1.224            |
| SOIIDS5   | -5.723            | -4.000            | 1.722            | 0                          | -7.984                      | 0     | 1.479            |
| SOIIDS6   | -5.693            | -3.764            | 1.929            | 0                          | -11.766                     | 0     | 1.516            |
| SOIIDS7   | -5.645            | -3.831            | 1.814            | 0                          | -10.118                     | 0     | 1.537            |
| SOIIDS8   | -5.749            | -3.991            | 1.759            | 0                          | -8.581                      | 0     | 1.475            |
| SOIIDS9   | -4.614            | -2.602            | 2.012            | 0                          | -12.832                     | 0     | 1.124            |
| SOIIDS10  | -4.577            | -2.583            | 1.994            | 0                          | -12.656                     | 0     | 1.114            |
| SOIIDTS1  | -5.387            | -3.867            | 1.521            | -0.642                     | -4.906                      | 0.070 | 1.608            |
| SOIIDTS2  | -4.949            | -3.659            | 1.290            | -2.738                     | -2.449                      | 0.294 | 1.982            |
| SOIIDTS3  | -5.247            | -4.117            | 1.130            | -2.862                     | -2.189                      | 0.297 | 2.020            |
| SOIIDTS4  | -4.963            | -3.477            | 1.487            | -0.772                     | -4.322                      | 0.091 | 1.675            |
| SOIIDTS5  | -5.337            | -3.952            | 1.385            | -0.639                     | -4.642                      | 0.069 | 1.783            |
| SOIIDTS6  | -5.305            | -3.790            | 1.514            | -0.177                     | -5.965                      | 0.019 | 1.780            |
| SOIIDTS7  | -5.268            | -3.844            | 1.424            | -0.428                     | -4.782                      | 0.050 | 1.876            |
| SOIIDTS8  | -5.370            | -3.962            | 1.407            | -0.612                     | -4.161                      | 0.077 | 1.713            |
| SOIIDTS9  | -4.379            | -2.860            | 1.519            | -0.331                     | -5.717                      | 0.033 | 1.582            |
| SOIIDTS10 | -4.355            | -2.849            | 1.506            | -0.365                     | -5.651                      | 0.037 | 1.571            |

<sup>a</sup> HOMO, LUMO and HLG are in eV

<sup>b</sup>  $\Delta E(\text{OS-CS})$ ,  $\Delta E(\text{OS-T}_1)$  are in kcal mol<sup>-1</sup>.

**Table S11.** HOMO, LUMO energy levels and HLG values,  $\Delta E(\text{OS-CS})$ ,  $\Delta E(\text{OS-T}_1)$  and diradical character  $y_0$  of S2IIDS<sub>n</sub> and S9IIDS<sub>n</sub>.

| Compound | HOMO <sup>a</sup> | LUMO <sup>a</sup> | HLG <sup>a</sup> | $\Delta E(\text{OS-CS})^b$ | $\Delta E(\text{OS-T}_1)^b$ | $y_0$ | $N^{\text{FOD}}$ |
|----------|-------------------|-------------------|------------------|----------------------------|-----------------------------|-------|------------------|
| S2IIDS1  | -5.880            | -4.386            | 1.494            | -1.770                     | -3.050                      | 0.231 | 2.024            |
| S2IIDS3  | -5.663            | -4.540            | 1.123            | -5.156                     | -1.244                      | 0.539 | 2.402            |
| S2IIDS4  | -5.461            | -4.008            | 1.453            | -2.018                     | -2.761                      | 0.267 | 2.086            |
| S2IIDS5  | -5.797            | -4.487            | 1.311            | -2.992                     | -1.948                      | 0.381 | 2.379            |
| S2IIDS6  | -5.758            | -4.297            | 1.461            | -1.367                     | -3.165                      | 0.184 | 2.350            |
| S2IIDS7  | -5.715            | -4.332            | 1.384            | -1.873                     | -2.565                      | 0.257 | 2.395            |
| S2IIDS8  | -5.808            | -4.455            | 1.353            | -2.477                     | -2.063                      | 0.339 | 2.375            |
| S2IIDS9  | -4.803            | -3.372            | 1.431            | -0.962                     | -4.288                      | 0.102 | 1.836            |
| S2IIDS10 | -4.786            | -3.366            | 1.420            | -1.007                     | -4.250                      | 0.106 | 1.824            |
| S9IIDS1  | -5.213            | -3.549            | 1.664            | 0                          | -10.890                     | 0     | 1.395            |
| S9IIDS3  | -5.069            | -3.816            | 1.254            | -0.614                     | -5.205                      | 0.051 | 1.811            |
| S9IIDS4  | -4.854            | -3.186            | 1.668            | 0                          | -9.475                      | 0     | 1.458            |
| S9IIDS5  | -5.181            | -3.734            | 1.447            | 0                          | -8.274                      | 0     | 1.678            |
| S9IIDS6  | -5.154            | -3.547            | 1.607            | 0                          | -11.399                     | 0     | 1.726            |
| S9IIDS7  | -5.118            | -3.606            | 1.512            | 0                          | -10.080                     | 0     | 1.761            |
| S9IIDS8  | -5.208            | -3.753            | 1.455            | 0                          | -8.930                      | 0     | 1.705            |
| S9IIDS10 | -4.235            | -2.467            | 1.768            | 0                          | -10.853                     | 0     | 1.358            |

<sup>a</sup> HOMO, LUMO and HLG are in eV

<sup>b</sup>  $\Delta E(\text{OS-CS})$ ,  $\Delta E(\text{OS-T}_1)$  are in kcal mol<sup>-1</sup>.

**Table S12.** Calculated Hirshfeld charges and dipole moments (D) of S2IIDS<sub>n</sub> and S9IIDS<sub>n</sub> in OS state.

| Molecule | Fragment |        |        | $\mu$ | Molecule | Fragment |        |        | $\mu$ |
|----------|----------|--------|--------|-------|----------|----------|--------|--------|-------|
|          | S2       | IID    | Sn     |       |          | S9       | IID    | Sn     |       |
| S2IIDS1  | -0.022   | +0.236 | -0.214 | 4.38  | S9IIDS1  | +0.252   | +0.043 | -0.294 | 20.23 |
| S2IIDS3  | -0.029   | +0.142 | -0.113 | 6.47  | S9IIDS3  | +0.246   | -0.018 | -0.228 | 24.97 |
| S2IIDS4  | -0.054   | +0.101 | -0.047 | 3.18  | S9IIDS4  | +0.209   | -0.083 | -0.127 | 12.58 |
| S2IIDS5  | -0.025   | +0.187 | -0.162 | 4.90  | S9IIDS5  | +0.266   | +0.031 | -0.297 | 23.90 |
| S2IIDS6  | -0.029   | +0.206 | -0.177 | 1.62  | S9IIDS6  | +0.252   | +0.023 | -0.275 | 19.16 |
| S2IIDS7  | -0.029   | +0.217 | -0.188 | 4.73  | S9IIDS7  | +0.257   | +0.052 | -0.309 | 17.91 |
| S2IIDS8  | -0.021   | +0.251 | -0.230 | 3.45  | S9IIDS8  | +0.275   | +0.101 | -0.376 | 19.15 |
| S2IIDS9  | -0.121   | -0.079 | +0.200 | 15.39 | S9IIDS10 | +0.137   | -0.291 | +0.154 | 2.51  |
| S2IIDS10 | -0.122   | -0.088 | +0.210 | 15.12 |          |          |        |        |       |

**Table S13.** HOMO, LUMO energy levels and HLG values,  $\Delta E(\text{OS-CS})$ ,  $\Delta E(\text{OS-T})$  and diradical character  $y_0$  of S2TIIDTSn and S9TIIDTSn.

| Compound   | HOMO <sup>a</sup> | LUMO <sup>a</sup> | HLG <sup>a</sup> | $\Delta E(\text{OS-CS})^b$ | $\Delta E(\text{OS-T}_1)^b$ | $y_0$ | $N^{\text{FOD}}$ |
|------------|-------------------|-------------------|------------------|----------------------------|-----------------------------|-------|------------------|
| S2TIIDTS1  | -5.209            | -4.318            | 0.891            | -6.899                     | -0.788                      | 0.644 | 2.528            |
| S2TIIDTS3  | -5.119            | -4.500            | 0.619            | -9.543                     | -0.334                      | 0.781 | 2.781            |
| S2TIIDTS4  | -4.866            | -4.003            | 0.863            | -7.233                     | -0.680                      | 0.677 | 2.553            |
| S2TIIDTS5  | -5.182            | -4.376            | 0.806            | -6.751                     | -0.722                      | 0.643 | 2.679            |
| S2TIIDTS6  | -5.141            | -4.250            | 0.891            | -5.869                     | -0.943                      | 0.588 | 2.735            |
| S2TIIDTS7  | -5.114            | -4.284            | 0.830            | -6.526                     | -0.728                      | 0.643 | 2.791            |
| S2TIIDTS8  | -5.201            | -4.387            | 0.814            | -6.952                     | -0.632                      | 0.666 | 2.745            |
| S2TIIDTS9  | -4.379            | -3.515            | 0.864            | -5.513                     | -1.094                      | 0.515 | 2.382            |
| S2TIIDTS10 | -4.372            | -3.514            | 0.857            | -5.551                     | -1.092                      | 0.513 | 2.366            |
| S9TIIDTS1  | -4.691            | -3.678            | 1.013            | -2.501                     | -2.641                      | 0.228 | 2.117            |
| S9TIIDTS3  | -4.630            | -3.908            | 0.722            | -4.366                     | -1.446                      | 0.351 | 2.346            |
| S9TIIDTS4  | -4.389            | -3.377            | 1.011            | -3.373                     | -1.857                      | 0.352 | 2.230            |
| S9TIIDTS5  | -4.695            | -3.777            | 0.917            | -2.224                     | -2.706                      | 0.193 | 2.221            |
| S9TIIDTS6  | -4.663            | -3.651            | 1.012            | -1.738                     | -3.110                      | 0.163 | 2.272            |
| S9TIIDTS7  | -4.644            | -3.706            | 0.938            | -2.100                     | -2.625                      | 0.194 | 2.363            |
| S9TIIDTS8  | -4.730            | -3.834            | 0.895            | -2.223                     | -2.617                      | 0.188 | 2.293            |
| S9TIIDTS10 | -3.924            | -2.861            | 1.063            | -3.288                     | -1.968                      | 0.361 | 2.258            |

<sup>a</sup> HOMO, LUMO and HLG are in eV

<sup>b</sup>  $\Delta E(\text{OS-CS})$ ,  $\Delta E(\text{OS-T}_1)$  are in kcal mol<sup>-1</sup>.

**Table S14.** Calculated Hirshfeld charges and dipole moments (D) of S2TIIDTS<sub>n</sub>, S9TIIDTS<sub>n</sub> and SnIIDT in OS state.

| Molecule   | Fragment |         |        | $\mu$ | Molecule   | Fragment |         |        | $\mu$ |
|------------|----------|---------|--------|-------|------------|----------|---------|--------|-------|
|            | S2       | T-IID-T | Sn     |       |            | S9       | T-IID-T | Sn     |       |
| S2TIIDTS1  | -0.079   | +0.326  | -0.247 | 5.01  | S9TIIDTS1  | +0.163   | +0.129  | -0.292 | 22.57 |
| S2TIIDTS3  | -0.080   | +0.238  | -0.157 | 7.40  | S9TIIDTS3  | +0.160   | +0.067  | -0.227 | 27.09 |
| S2TIIDTS4  | -0.094   | +0.196  | -0.102 | 3.79  | S9TIIDTS4  | +0.131   | +0.007  | -0.138 | 12.79 |
| S2TIIDTS5  | -0.080   | +0.295  | -0.215 | 6.36  | S9TIIDTS5  | +0.170   | +0.119  | -0.289 | 26.03 |
| S2TIIDTS6  | -0.083   | +0.311  | -0.228 | 2.71  | S9TIIDTS6  | +0.165   | +0.125  | -0.290 | 21.44 |
| S2TIIDTS7  | -0.083   | +0.321  | -0.237 | 2.52  | S9TIIDTS7  | +0.165   | +0.147  | -0.312 | 19.22 |
| S2TIIDTS8  | -0.079   | +0.364  | -0.285 | 0.97  | S9TIIDTS8  | +0.177   | +0.199  | -0.376 | 21.58 |
| S2TIIDTS9  | -0.123   | -0.005  | 0.129  | 15.42 | S9TIIDTS10 | +0.097   | -0.207  | +0.110 | 1.64  |
| S2TIIDTS10 | -0.124   | -0.015  | 0.139  | 15.38 |            |          |         |        |       |
| S1IIDT     | -0.237   | +0.474  | -0.237 | 1.88  | S6IIDT     | -0.220   | +0.440  | -0.220 | 1.14  |
| S2IIDT     | -0.091   | +0.182  | -0.091 | 2.82  | S7IIDT     | -0.228   | +0.456  | -0.228 | 4.21  |
| S3IIDT     | -0.144   | +0.288  | -0.144 | 0.55  | S8IIDT     | -0.268   | +0.536  | -0.268 | 4.82  |
| S4IIDT     | -0.105   | +0.211  | -0.105 | 0.47  | S9IIDT     | +0.098   | -0.196  | +0.098 | 1.62  |
| S5IIDT     | -0.203   | +0.406  | -0.203 | 1.91  | S10IIDT    | +0.109   | -0.218  | +0.109 | 1.60  |

## Coordinate and energy

S1IID-CS E = -1400.685701 Hartree

|   |              |              |              |
|---|--------------|--------------|--------------|
| 6 | 2.813671000  | 1.069988000  | 0.254969000  |
| 6 | 1.920365000  | -0.071623000 | 0.082891000  |
| 6 | 2.505567000  | -1.318800000 | -0.321206000 |
| 6 | 3.849658000  | -1.407591000 | -0.507914000 |
| 6 | 4.729121000  | -0.270494000 | -0.312006000 |
| 6 | 4.160924000  | 0.992072000  | 0.077447000  |
| 6 | 0.706446000  | 1.830095000  | 0.646842000  |
| 6 | 0.619327000  | 0.359808000  | 0.307544000  |
| 1 | 1.873756000  | -2.185892000 | -0.448160000 |
| 1 | 4.293234000  | -2.349803000 | -0.809762000 |
| 1 | 4.805977000  | 1.851871000  | 0.214878000  |
| 6 | -0.619334000 | -0.359503000 | 0.307606000  |
| 6 | -1.920409000 | 0.071803000  | 0.082885000  |
| 6 | -0.706330000 | -1.829760000 | 0.647037000  |
| 6 | -2.813623000 | -1.069858000 | 0.255145000  |
| 6 | -2.505725000 | 1.318857000  | -0.321435000 |
| 6 | -4.160887000 | -0.992080000 | 0.077639000  |
| 6 | -3.849828000 | 1.407506000  | -0.508132000 |
| 1 | -1.873994000 | 2.185977000  | -0.448564000 |
| 6 | -4.729198000 | 0.270378000  | -0.311996000 |
| 1 | -4.805864000 | -1.851916000 | 0.215201000  |
| 1 | -4.293485000 | 2.349628000  | -0.810141000 |
| 8 | 0.188357000  | -2.606189000 | 0.935520000  |
| 8 | -0.188147000 | 2.606604000  | 0.935402000  |
| 7 | -2.057510000 | -2.170337000 | 0.601847000  |
| 7 | 2.057651000  | 2.170564000  | 0.601571000  |
| 6 | 2.559022000  | 3.502466000  | 0.886546000  |
| 1 | 3.244303000  | 3.484445000  | 1.739549000  |
| 1 | 3.078582000  | 3.915796000  | 0.016374000  |
| 1 | 1.699098000  | 4.127917000  | 1.126456000  |
| 6 | -2.558767000 | -3.502254000 | 0.886954000  |
| 1 | -3.244031000 | -3.484210000 | 1.739970000  |
| 1 | -3.078314000 | -3.915704000 | 0.016831000  |
| 1 | -1.698788000 | -4.127614000 | 1.126902000  |
| 6 | 6.104411000  | -0.403010000 | -0.509079000 |
| 6 | -6.104501000 | 0.402744000  | -0.509075000 |
| 6 | 6.989511000  | 0.699302000  | -0.326312000 |
| 7 | 7.692855000  | 1.615480000  | -0.171386000 |
| 6 | 6.697309000  | -1.637475000 | -0.903671000 |

|   |              |              |              |
|---|--------------|--------------|--------------|
| 7 | 7.177206000  | -2.648716000 | -1.227679000 |
| 6 | -6.697559000 | 1.637209000  | -0.903429000 |
| 7 | -7.177587000 | 2.648447000  | -1.227252000 |
| 6 | -6.989454000 | -0.699728000 | -0.326560000 |
| 7 | -7.692680000 | -1.616028000 | -0.171823000 |

**S2IID-CS** E=-1565.641705 Hartree

|   |              |              |              |
|---|--------------|--------------|--------------|
| 6 | -2.781416000 | 1.152487000  | -0.367158000 |
| 6 | -1.936411000 | -0.015428000 | -0.221943000 |
| 6 | -2.583025000 | -1.233990000 | 0.141968000  |
| 6 | -3.937222000 | -1.264431000 | 0.326567000  |
| 6 | -4.785246000 | -0.106585000 | 0.157364000  |
| 6 | -4.136217000 | 1.125203000  | -0.201059000 |
| 6 | -0.641932000 | 1.856303000  | -0.710874000 |
| 6 | -0.604146000 | 0.377824000  | -0.419033000 |
| 1 | -1.997737000 | -2.136698000 | 0.238189000  |
| 1 | -4.388073000 | -2.215615000 | 0.575759000  |
| 1 | -4.703790000 | 2.040296000  | -0.301087000 |
| 6 | 0.604152000  | -0.377775000 | -0.419110000 |
| 6 | 1.936420000  | 0.015459000  | -0.222013000 |
| 6 | 0.641944000  | -1.856206000 | -0.711201000 |
| 6 | 2.781420000  | -1.152448000 | -0.367313000 |
| 6 | 2.583034000  | 1.233988000  | 0.142005000  |
| 6 | 4.136218000  | -1.125186000 | -0.201186000 |
| 6 | 3.937229000  | 1.264408000  | 0.326621000  |
| 1 | 1.997746000  | 2.136688000  | 0.238306000  |
| 6 | 4.785249000  | 0.106571000  | 0.157338000  |
| 1 | 4.703786000  | -2.040274000 | -0.301279000 |
| 1 | 4.388081000  | 2.215570000  | 0.575900000  |
| 8 | -0.273098000 | -2.623160000 | -0.973474000 |
| 8 | 0.273096000  | 2.623256000  | -0.973204000 |
| 7 | 1.982049000  | -2.240079000 | -0.668220000 |
| 7 | -1.982048000 | 2.240146000  | -0.667970000 |
| 6 | -2.429855000 | 3.594289000  | -0.917999000 |
| 1 | -3.111079000 | 3.628845000  | -1.774751000 |
| 1 | -2.937936000 | 4.007934000  | -0.040137000 |
| 1 | -1.544557000 | 4.191706000  | -1.137346000 |
| 6 | 2.429846000  | -3.594217000 | -0.918292000 |
| 1 | 3.111124000  | -3.628736000 | -1.775003000 |
| 1 | 2.937863000  | -4.007922000 | -0.040422000 |
| 1 | 1.544551000  | -4.191604000 | -1.137730000 |
| 6 | -6.189552000 | -0.182186000 | 0.339407000  |
| 6 | -7.061542000 | 0.920431000  | -0.002813000 |



|   |               |              |              |
|---|---------------|--------------|--------------|
| 6 | -6.830720000  | -1.361626000 | 0.878948000  |
| 6 | -8.406731000  | 0.862680000  | 0.164376000  |
| 1 | -6.633792000  | 1.815473000  | -0.439174000 |
| 6 | -8.172602000  | -1.436688000 | 1.067043000  |
| 1 | -6.220654000  | -2.206729000 | 1.174076000  |
| 6 | -9.067698000  | -0.325683000 | 0.720156000  |
| 1 | -9.049756000  | 1.691736000  | -0.113756000 |
| 1 | -8.637098000  | -2.322205000 | 1.489127000  |
| 6 | 6.189552000   | 0.182151000  | 0.339407000  |
| 6 | 7.061541000   | -0.920443000 | -0.002888000 |
| 6 | 6.830717000   | 1.361545000  | 0.879051000  |
| 6 | 8.406727000   | -0.862711000 | 0.164325000  |
| 1 | 6.633794000   | -1.815449000 | -0.439325000 |
| 6 | 8.172596000   | 1.436587000  | 1.067170000  |
| 1 | 6.220651000   | 2.206628000  | 1.174237000  |
| 6 | 9.067692000   | 0.325605000  | 0.720208000  |
| 1 | 9.049752000   | -1.691748000 | -0.113862000 |
| 1 | 8.637089000   | 2.322067000  | 1.489331000  |
| 8 | -10.291035000 | -0.384944000 | 0.883167000  |
| 8 | 10.291026000  | 0.384848000  | 0.883241000  |

**S3IID-CS**

E=-2536.386509 Hartree

|   |              |              |              |
|---|--------------|--------------|--------------|
| 6 | 2.659553000  | 1.407590000  | 0.538905000  |
| 6 | 1.934678000  | 0.163179000  | 0.389325000  |
| 6 | 2.690241000  | -0.993192000 | 0.037582000  |
| 6 | 4.046694000  | -0.901507000 | -0.120361000 |
| 6 | 4.763662000  | 0.332541000  | 0.055379000  |
| 6 | 4.014658000  | 1.508618000  | 0.389976000  |
| 6 | 0.461461000  | 1.911374000  | 0.854660000  |
| 6 | 0.563871000  | 0.430720000  | 0.570276000  |
| 1 | 2.189244000  | -1.942918000 | -0.076524000 |
| 1 | 4.602959000  | -1.794980000 | -0.383997000 |
| 1 | 4.508316000  | 2.463755000  | 0.515861000  |
| 6 | -0.563852000 | -0.430856000 | 0.570207000  |
| 6 | -1.934639000 | -0.163301000 | 0.389132000  |
| 6 | -0.461468000 | -1.911534000 | 0.854478000  |
| 6 | -2.659570000 | -1.407647000 | 0.538960000  |
| 6 | -2.690158000 | 0.993052000  | 0.037233000  |
| 6 | -4.014689000 | -1.508629000 | 0.390124000  |
| 6 | -4.046620000 | 0.901405000  | -0.120656000 |
| 1 | -2.189124000 | 1.942743000  | -0.077006000 |
| 6 | -4.763644000 | -0.332576000 | 0.055327000  |
| 1 | -4.508393000 | -2.463716000 | 0.516211000  |

|    |               |              |              |
|----|---------------|--------------|--------------|
| 1  | -4.602852000  | 1.794864000  | -0.384409000 |
| 8  | 0.524176000   | -2.589239000 | 1.100760000  |
| 8  | -0.524269000  | 2.589169000  | 1.100353000  |
| 7  | -1.759595000  | -2.415471000 | 0.830800000  |
| 7  | 1.759535000   | 2.415429000  | 0.830562000  |
| 6  | 2.077850000   | 3.807726000  | 1.078717000  |
| 1  | 2.740034000   | 3.907371000  | 1.944850000  |
| 1  | 2.557365000   | 4.260736000  | 0.204607000  |
| 1  | 1.139009000   | 4.322912000  | 1.282416000  |
| 6  | -2.077992000  | -3.807663000 | 1.079438000  |
| 1  | -2.740029000  | -3.906995000 | 1.945720000  |
| 1  | -2.557706000  | -4.260886000 | 0.205548000  |
| 1  | -1.139160000  | -4.322874000 | 1.283116000  |
| 6  | 6.160702000   | 0.385276000  | -0.104395000 |
| 6  | 7.013188000   | 1.524605000  | 0.036394000  |
| 16 | 7.175606000   | -0.990187000 | -0.525616000 |
| 1  | 6.642312000   | 2.510349000  | 0.296198000  |
| 6  | 8.597751000   | 0.076458000  | -0.472470000 |
| 6  | -6.160694000  | -0.385267000 | -0.104378000 |
| 6  | -7.013233000  | -1.524527000 | 0.036652000  |
| 16 | -7.175545000  | 0.990174000  | -0.525799000 |
| 1  | -6.642396000  | -2.510243000 | 0.296617000  |
| 6  | -8.597743000  | -0.076387000 | -0.472395000 |
| 6  | 9.886654000   | -0.367991000 | -0.728676000 |
| 6  | -9.886635000  | 0.368085000  | -0.728621000 |
| 6  | 10.992216000  | 0.526980000  | -0.672385000 |
| 7  | 11.918231000  | 1.232414000  | -0.635042000 |
| 6  | 10.134290000  | -1.730087000 | -1.054721000 |
| 7  | 10.307399000  | -2.851976000 | -1.319762000 |
| 6  | -10.134213000 | 1.730135000  | -1.054899000 |
| 7  | -10.307277000 | 2.851987000  | -1.320127000 |
| 6  | -10.992241000 | -0.526819000 | -0.672123000 |
| 7  | -11.918291000 | -1.232198000 | -0.634613000 |
| 7  | -8.301288000  | -1.366347000 | -0.156877000 |
| 7  | 8.301243000   | 1.366459000  | -0.157166000 |

**S4IID-CS** E=-2468.441407 Hartree

|   |             |              |              |
|---|-------------|--------------|--------------|
| 6 | 2.745232000 | 1.237355000  | 0.495692000  |
| 6 | 1.923088000 | 0.044927000  | 0.334058000  |
| 6 | 2.587928000 | -1.158816000 | -0.067765000 |
| 6 | 3.935215000 | -1.169807000 | -0.268399000 |
| 6 | 4.753145000 | 0.018986000  | -0.085885000 |
| 6 | 4.092257000 | 1.241581000  | 0.306002000  |

|    |               |              |              |
|----|---------------|--------------|--------------|
| 6  | 0.594018000   | 1.865400000  | 0.899794000  |
| 6  | 0.596441000   | 0.397378000  | 0.564432000  |
| 1  | 2.013044000   | -2.066380000 | -0.183897000 |
| 1  | 4.434661000   | -2.080015000 | -0.568729000 |
| 1  | 4.665359000   | 2.152525000  | 0.438001000  |
| 6  | -0.596450000  | -0.397296000 | 0.564794000  |
| 6  | -1.923123000  | -0.044850000 | 0.334604000  |
| 6  | -0.594117000  | -1.865078000 | 0.901231000  |
| 6  | -2.745273000  | -1.237235000 | 0.496502000  |
| 6  | -2.587936000  | 1.158804000  | -0.067517000 |
| 6  | -4.092285000  | -1.241508000 | 0.306723000  |
| 6  | -3.935217000  | 1.169762000  | -0.268185000 |
| 1  | -2.013024000  | 2.066321000  | -0.183903000 |
| 6  | -4.753157000  | -0.018990000 | -0.085439000 |
| 1  | -4.665396000  | -2.152423000 | 0.438891000  |
| 1  | -4.434643000  | 2.079894000  | -0.568780000 |
| 8  | 0.340421000   | -2.592861000 | 1.197611000  |
| 8  | -0.340412000  | 2.593018000  | 1.196921000  |
| 7  | -1.923640000  | -2.290801000 | 0.845311000  |
| 7  | 1.923599000   | 2.290993000  | 0.844284000  |
| 6  | 2.338170000   | 3.650639000  | 1.121585000  |
| 1  | 3.031018000   | 3.683092000  | 1.968984000  |
| 1  | 2.821898000   | 4.098722000  | 0.246994000  |
| 1  | 1.440141000   | 4.217859000  | 1.368015000  |
| 6  | -2.338142000  | -3.650534000 | 1.122292000  |
| 1  | -3.031315000  | -3.683148000 | 1.969416000  |
| 1  | -2.821472000  | -4.098603000 | 0.247472000  |
| 1  | -1.440138000  | -4.217659000 | 1.369032000  |
| 6  | -6.125198000  | 0.004107000  | -0.283950000 |
| 6  | -6.938868000  | 1.172433000  | -0.697663000 |
| 16 | -7.159874000  | -1.414890000 | -0.067671000 |
| 6  | -8.646821000  | -0.483657000 | -0.515475000 |
| 6  | 6.125195000   | -0.004147000 | -0.284335000 |
| 6  | 6.938899000   | -1.172571000 | -0.697707000 |
| 16 | 7.159847000   | 1.414915000  | -0.068361000 |
| 6  | 8.646832000   | 0.483572000  | -0.515810000 |
| 8  | -6.560819000  | 2.310078000  | -0.937200000 |
| 8  | 6.560880000   | -2.310288000 | -0.936948000 |
| 8  | 9.756032000   | 0.960029000  | -0.551144000 |
| 8  | -9.756021000  | -0.960117000 | -0.550768000 |
| 6  | -9.288080000  | 1.813141000  | -1.191651000 |
| 1  | -9.292967000  | 2.637809000  | -0.475617000 |
| 1  | -9.045760000  | 2.209313000  | -2.180089000 |
| 1  | -10.258334000 | 1.319357000  | -1.207915000 |

|   |              |              |              |
|---|--------------|--------------|--------------|
| 6 | 9.288154000  | -1.813398000 | -1.191339000 |
| 1 | 9.292888000  | -2.637944000 | -0.475163000 |
| 1 | 9.045993000  | -2.209732000 | -2.179752000 |
| 1 | 10.258426000 | -1.319648000 | -1.207524000 |
| 7 | -8.292045000 | 0.820752000  | -0.798088000 |
| 7 | 8.292083000  | -0.820912000 | -0.798110000 |

S5IID-CS E= -2011.347011 Hartree

|   |              |              |              |
|---|--------------|--------------|--------------|
| 6 | -2.781284000 | 1.143656000  | -0.463157000 |
| 6 | -1.928625000 | -0.021477000 | -0.303401000 |
| 6 | -2.564652000 | -1.237666000 | 0.092379000  |
| 6 | -3.915507000 | -1.280617000 | 0.287332000  |
| 6 | -4.773480000 | -0.127635000 | 0.088209000  |
| 6 | -4.133180000 | 1.107385000  | -0.293070000 |
| 6 | -0.650607000 | 1.853795000  | -0.829824000 |
| 6 | -0.606000000 | 0.374690000  | -0.514604000 |
| 1 | -1.972590000 | -2.133473000 | 0.210817000  |
| 1 | -4.383611000 | -2.204274000 | 0.589289000  |
| 1 | -4.699922000 | 2.021692000  | -0.400175000 |
| 6 | 0.606003000  | -0.374636000 | -0.514625000 |
| 6 | 1.928630000  | 0.021508000  | -0.303392000 |
| 6 | 0.650598000  | -1.853723000 | -0.829926000 |
| 6 | 2.781280000  | -1.143623000 | -0.463213000 |
| 6 | 2.564666000  | 1.237667000  | 0.092469000  |
| 6 | 4.133176000  | -1.107374000 | -0.293120000 |
| 6 | 3.915521000  | 1.280594000  | 0.287428000  |
| 1 | 1.972613000  | 2.133472000  | 0.210962000  |
| 6 | 4.773485000  | 0.127619000  | 0.088236000  |
| 1 | 4.699910000  | -2.021680000 | -0.400276000 |
| 1 | 4.383632000  | 2.204228000  | 0.589446000  |
| 8 | -0.264479000 | -2.609593000 | -1.108768000 |
| 8 | 0.264461000  | 2.609685000  | -1.108639000 |
| 7 | 1.991104000  | -2.231785000 | -0.782925000 |
| 7 | -1.991116000 | 2.231843000  | -0.782806000 |
| 6 | -2.449814000 | 3.580552000  | -1.053656000 |
| 1 | -3.132679000 | 3.595080000  | -1.909171000 |
| 1 | -2.957629000 | 4.002471000  | -0.180194000 |
| 1 | -1.570228000 | 4.181701000  | -1.284578000 |
| 6 | 2.449792000  | -3.580483000 | -1.053844000 |
| 1 | 3.132659000  | -3.594972000 | -1.909359000 |
| 1 | 2.957600000  | -4.002453000 | -0.180403000 |
| 1 | 1.570201000  | -4.181613000 | -1.284802000 |
| 6 | -6.180897000 | -0.191355000 | 0.247072000  |

|   |               |              |              |
|---|---------------|--------------|--------------|
| 6 | -6.869860000  | -1.376741000 | 0.845389000  |
| 6 | -7.011093000  | 0.891784000  | -0.167945000 |
| 6 | -8.371359000  | 0.884985000  | -0.045525000 |
| 1 | -6.563833000  | 1.757267000  | -0.638504000 |
| 6 | -9.087851000  | -0.260551000 | 0.545888000  |
| 6 | 6.180901000   | 0.191323000  | 0.247111000  |
| 6 | 7.011101000   | -0.891791000 | -0.167965000 |
| 6 | 6.869858000   | 1.376675000  | 0.845501000  |
| 6 | 8.371367000   | -0.884995000 | -0.045541000 |
| 1 | 6.563846000   | -1.757248000 | -0.638576000 |
| 6 | 9.087855000   | 0.260512000  | 0.545935000  |
| 6 | -9.151678000  | 1.987391000  | -0.501136000 |
| 7 | -9.748597000  | 2.910224000  | -0.884322000 |
| 8 | -6.299209000  | -2.377409000 | 1.267771000  |
| 8 | -10.301908000 | -0.286531000 | 0.673652000  |
| 7 | -8.267140000  | -1.323763000 | 0.947449000  |
| 6 | -8.911017000  | -2.499457000 | 1.549644000  |
| 1 | -8.677280000  | -3.389145000 | 0.962179000  |
| 1 | -8.533617000  | -2.648891000 | 2.562939000  |
| 1 | -9.982231000  | -2.316769000 | 1.561435000  |
| 6 | 9.151691000   | -1.987371000 | -0.501216000 |
| 7 | 9.748614000   | -2.910180000 | -0.884455000 |
| 8 | 10.301912000  | 0.286492000  | 0.673695000  |
| 8 | 6.299201000   | 2.377326000  | 1.267914000  |
| 7 | 8.267139000   | 1.323700000  | 0.947553000  |
| 6 | 8.911011000   | 2.499367000  | 1.549804000  |
| 1 | 8.677268000   | 3.389084000  | 0.962384000  |
| 1 | 8.533613000   | 2.648748000  | 2.563108000  |
| 1 | 9.982226000   | 2.316683000  | 1.561583000  |

**S6IID-CS**

E= -2733.987173 Hartree

|   |              |              |              |
|---|--------------|--------------|--------------|
| 6 | 2.729301000  | -1.263087000 | -0.335841000 |
| 6 | 1.919221000  | -0.065633000 | -0.173741000 |
| 6 | 2.606016000  | 1.127402000  | 0.224270000  |
| 6 | 3.950068000  | 1.108360000  | 0.432150000  |
| 6 | 4.766364000  | -0.094715000 | 0.263654000  |
| 6 | 4.077159000  | -1.295769000 | -0.152033000 |
| 6 | 0.577042000  | -1.878364000 | -0.742669000 |
| 6 | 0.591836000  | -0.401621000 | -0.405981000 |
| 1 | 2.053293000  | 2.050134000  | 0.327324000  |
| 1 | 4.445526000  | 2.015586000  | 0.737464000  |
| 1 | 4.639103000  | -2.207670000 | -0.274761000 |
| 6 | -0.591851000 | 0.401700000  | -0.405988000 |

|   |              |              |              |
|---|--------------|--------------|--------------|
| 6 | -1.919231000 | 0.065723000  | -0.173702000 |
| 6 | -0.577069000 | 1.878422000  | -0.742770000 |
| 6 | -2.729318000 | 1.263163000  | -0.335862000 |
| 6 | -2.606018000 | -1.127289000 | 0.224390000  |
| 6 | -4.077173000 | 1.295855000  | -0.152039000 |
| 6 | -3.950069000 | -1.108238000 | 0.432278000  |
| 1 | -2.053295000 | -2.050015000 | 0.327493000  |
| 6 | -4.766374000 | 0.094824000  | 0.263731000  |
| 1 | -4.639115000 | 2.207749000  | -0.274817000 |
| 1 | -4.445520000 | -2.015452000 | 0.737645000  |
| 8 | 0.370082000  | 2.586706000  | -1.040466000 |
| 8 | -0.370116000 | -2.586664000 | -1.040303000 |
| 7 | -1.897857000 | 2.312391000  | -0.684495000 |
| 7 | 1.897830000  | -2.312333000 | -0.684394000 |
| 6 | 2.308259000  | -3.675868000 | -0.960122000 |
| 1 | 2.997248000  | -3.709347000 | -1.809753000 |
| 1 | 2.798699000  | -4.116441000 | -0.086523000 |
| 1 | 1.408921000  | -4.243763000 | -1.198968000 |
| 6 | -2.308296000 | 3.675909000  | -0.960293000 |
| 1 | -2.997294000 | 3.709338000  | -1.809920000 |
| 1 | -2.798730000 | 4.116527000  | -0.086714000 |
| 1 | -1.408963000 | 4.243796000  | -1.199178000 |
| 6 | 6.163232000  | -0.060192000 | 0.441451000  |
| 6 | 6.844440000  | 1.141948000  | 0.965129000  |
| 6 | 7.015196000  | -1.222448000 | 0.118126000  |
| 6 | 8.997170000  | 0.270017000  | 0.103842000  |
| 6 | -6.163244000 | 0.060273000  | 0.441524000  |
| 6 | -7.015280000 | 1.222478000  | 0.118196000  |
| 6 | -6.844389000 | -1.141887000 | 0.965243000  |
| 6 | -8.997136000 | -0.270148000 | 0.103822000  |
| 8 | 6.291287000  | 2.023000000  | 1.613551000  |
| 7 | 8.222575000  | 1.260366000  | 0.678391000  |
| 6 | 8.869228000  | 2.529382000  | 1.053813000  |
| 1 | 8.108283000  | 3.156047000  | 1.508976000  |
| 1 | 9.679956000  | 2.337764000  | 1.758298000  |
| 1 | 9.288456000  | 3.003813000  | 0.165885000  |
| 8 | -6.291223000 | -2.022823000 | 1.613811000  |
| 7 | -8.222474000 | -1.260473000 | 0.678319000  |
| 6 | -8.869006000 | -2.529606000 | 1.053550000  |
| 1 | -8.108050000 | -3.156185000 | 1.508813000  |
| 1 | -9.679892000 | -2.338153000 | 1.757896000  |
| 1 | -9.288000000 | -3.004049000 | 0.165515000  |
| 8 | -6.611017000 | 2.375628000  | 0.001727000  |
| 8 | 6.610884000  | -2.375595000 | 0.001798000  |

|    |               |              |              |
|----|---------------|--------------|--------------|
| 7  | 8.385318000   | -0.954773000 | -0.098765000 |
| 7  | -8.385419000  | 0.954761000  | -0.098511000 |
| 6  | 9.210651000   | -2.077977000 | -0.575420000 |
| 1  | 10.029104000  | -2.256498000 | 0.123244000  |
| 1  | 8.564990000   | -2.948334000 | -0.639622000 |
| 1  | 9.636021000   | -1.834417000 | -1.549741000 |
| 6  | -9.210864000  | 2.077973000  | -0.574955000 |
| 1  | -10.029551000 | 2.256004000  | 0.123553000  |
| 1  | -8.565371000  | 2.948495000  | -0.638629000 |
| 1  | -9.635904000  | 1.834742000  | -1.549506000 |
| 16 | -10.604805000 | -0.523188000 | -0.279545000 |
| 16 | 10.604924000  | 0.522889000  | -0.279282000 |

**S7IID-CS**

E= -2241.868986 Hartree

|   |              |              |              |
|---|--------------|--------------|--------------|
| 6 | 2.846841000  | -0.965342000 | -0.376372000 |
| 6 | 1.919379000  | 0.147492000  | -0.234497000 |
| 6 | 2.466375000  | 1.409027000  | 0.168146000  |
| 6 | 3.808014000  | 1.540953000  | 0.364216000  |
| 6 | 4.738357000  | 0.443612000  | 0.143831000  |
| 6 | 4.190270000  | -0.843017000 | -0.186446000 |
| 6 | 0.773370000  | -1.808365000 | -0.769747000 |
| 6 | 0.630598000  | -0.334405000 | -0.451912000 |
| 1 | 1.810919000  | 2.259776000  | 0.285361000  |
| 1 | 4.221108000  | 2.493031000  | 0.665953000  |
| 1 | 4.831676000  | -1.709715000 | -0.252531000 |
| 6 | -0.630590000 | 0.334499000  | -0.451891000 |
| 6 | -1.919375000 | -0.147403000 | -0.234489000 |
| 6 | -0.773349000 | 1.808517000  | -0.769508000 |
| 6 | -2.846831000 | 0.965438000  | -0.376287000 |
| 6 | -2.466367000 | -1.408972000 | 0.168065000  |
| 6 | -4.190262000 | 0.843086000  | -0.186391000 |
| 6 | -3.808007000 | -1.540912000 | 0.364118000  |
| 1 | -1.810900000 | -2.259719000 | 0.285215000  |
| 6 | -4.738345000 | -0.443567000 | 0.143791000  |
| 1 | -4.831667000 | 1.709792000  | -0.252391000 |
| 1 | -4.221098000 | -2.493012000 | 0.665794000  |
| 8 | 0.089317000  | 2.615816000  | -1.069294000 |
| 8 | -0.089308000 | -2.615673000 | -1.069493000 |
| 7 | -2.132536000 | 2.102833000  | -0.694307000 |
| 7 | 2.132548000  | -2.102705000 | -0.694512000 |
| 6 | 2.695157000  | -3.396175000 | -1.038373000 |
| 1 | 3.410960000  | -3.291165000 | -1.859220000 |
| 1 | 3.195171000  | -3.846131000 | -0.174361000 |

|   |               |              |              |
|---|---------------|--------------|--------------|
| 1 | 1.869737000   | -4.036953000 | -1.348793000 |
| 6 | -2.695157000  | 3.396289000  | -1.038218000 |
| 1 | -3.410876000  | 3.291259000  | -1.859136000 |
| 1 | -3.195266000  | 3.846222000  | -0.174252000 |
| 1 | -1.869729000  | 4.037097000  | -1.348556000 |
| 6 | -6.114188000  | -0.646320000 | 0.320076000  |
| 6 | -6.688413000  | -1.757333000 | 1.159575000  |
| 6 | -7.230216000  | 0.222837000  | -0.041214000 |
| 6 | -8.068275000  | -1.335091000 | 1.499349000  |
| 6 | -8.381381000  | -0.139515000 | 0.828294000  |
| 6 | -8.962672000  | -1.967306000 | 2.352408000  |
| 6 | -9.628565000  | 0.456760000  | 1.038384000  |
| 6 | -10.207686000 | -1.369493000 | 2.556694000  |
| 1 | -8.681588000  | -2.896053000 | 2.838181000  |
| 6 | -10.525923000 | -0.168690000 | 1.910413000  |
| 1 | -9.910079000  | 1.383516000  | 0.557358000  |
| 1 | -10.932005000 | -1.831815000 | 3.220037000  |
| 1 | -11.493177000 | 0.291929000  | 2.086114000  |
| 6 | 6.114201000   | 0.646343000  | 0.320098000  |
| 6 | 7.230192000   | -0.222860000 | -0.041228000 |
| 6 | 6.688487000   | 1.757279000  | 1.159669000  |
| 6 | 8.381402000   | 0.139454000  | 0.828220000  |
| 6 | 8.068385000   | 1.335034000  | 1.499302000  |
| 6 | 9.628529000   | -0.456940000 | 1.038324000  |
| 6 | 8.962833000   | 1.967165000  | 2.352368000  |
| 6 | 10.525945000  | 0.168431000  | 1.910347000  |
| 1 | 9.909959000   | -1.383719000 | 0.557293000  |
| 6 | 10.207805000  | 1.369257000  | 2.556635000  |
| 1 | 8.681818000   | 2.895913000  | 2.838181000  |
| 1 | 11.493163000  | -0.292265000 | 2.086041000  |
| 1 | 10.932160000  | 1.831514000  | 3.219984000  |
| 8 | -6.151818000  | -2.785707000 | 1.544467000  |
| 8 | 6.151947000   | 2.785671000  | 1.544596000  |
| 6 | 7.315114000   | -1.086810000 | -1.123004000 |
| 6 | -7.315234000  | 1.086780000  | -1.122998000 |
| 6 | 6.326732000   | -1.202101000 | -2.148120000 |
| 7 | 5.565259000   | -1.329961000 | -3.020666000 |
| 6 | 8.473978000   | -1.882417000 | -1.384764000 |
| 7 | 9.391810000   | -2.560563000 | -1.619382000 |
| 6 | -6.326840000  | 1.202196000  | -2.148103000 |
| 7 | -5.565382000  | 1.330188000  | -3.020644000 |
| 6 | -8.474151000  | 1.882304000  | -1.384768000 |
| 7 | -9.392016000  | 2.560399000  | -1.619410000 |



S8IID-CS

E= -3112.308885 Hartree

|   |               |              |              |
|---|---------------|--------------|--------------|
| 6 | 2.814836000   | 1.055907000  | 0.572077000  |
| 6 | 1.922995000   | -0.086307000 | 0.431368000  |
| 6 | 2.508141000   | -1.333371000 | 0.037561000  |
| 6 | 3.850637000   | -1.419337000 | -0.169514000 |
| 6 | 4.742966000   | -0.286709000 | 0.025438000  |
| 6 | 4.160880000   | 0.978621000  | 0.376180000  |
| 6 | 0.716276000   | 1.831790000  | 0.967866000  |
| 6 | 0.619908000   | 0.354073000  | 0.650781000  |
| 1 | 1.883558000   | -2.209449000 | -0.056805000 |
| 1 | 4.276097000   | -2.380190000 | -0.429663000 |
| 1 | 4.778156000   | 1.863139000  | 0.443000000  |
| 6 | -0.619909000  | -0.353973000 | 0.650789000  |
| 6 | -1.922994000  | 0.086373000  | 0.431282000  |
| 6 | -0.716266000  | -1.831669000 | 0.967968000  |
| 6 | -2.814831000  | -1.055827000 | 0.572126000  |
| 6 | -2.508143000  | 1.333385000  | 0.037314000  |
| 6 | -4.160876000  | -0.978570000 | 0.376216000  |
| 6 | -3.850638000  | 1.419318000  | -0.169783000 |
| 1 | -1.883565000  | 2.209455000  | -0.057152000 |
| 6 | -4.742965000  | 0.286713000  | 0.025310000  |
| 1 | -4.778149000  | -1.863082000 | 0.443143000  |
| 1 | -4.276099000  | 2.380138000  | -0.430053000 |
| 8 | 0.170916000   | -2.611408000 | 1.267554000  |
| 8 | -0.170915000  | 2.611587000  | 1.267277000  |
| 7 | -2.065767000  | -2.168721000 | 0.892444000  |
| 7 | 2.065772000   | 2.168843000  | 0.892251000  |
| 6 | 2.585527000   | 3.483061000  | 1.224524000  |
| 1 | 3.300805000   | 3.410333000  | 2.049351000  |
| 1 | 3.073775000   | 3.939583000  | 0.357404000  |
| 1 | 1.739127000   | 4.100178000  | 1.526104000  |
| 6 | -2.585522000  | -3.482890000 | 1.224911000  |
| 1 | -3.300776000  | -3.410047000 | 2.049749000  |
| 1 | -3.073798000  | -3.939525000 | 0.357865000  |
| 1 | -1.739118000  | -4.099974000 | 1.526548000  |
| 6 | -6.113673000  | 0.436402000  | -0.187104000 |
| 6 | -7.236782000  | -0.401691000 | 0.156893000  |
| 6 | -8.255698000  | 0.991774000  | -1.531306000 |
| 6 | -8.387421000  | -0.173307000 | -0.760998000 |
| 6 | -9.208784000  | 1.424975000  | -2.439463000 |
| 6 | -9.540425000  | -0.950353000 | -0.949077000 |
| 6 | -10.355713000 | 0.645549000  | -2.599830000 |
| 1 | -9.057473000  | 2.334976000  | -3.010184000 |

|    |               |              |              |
|----|---------------|--------------|--------------|
| 6  | -10.507814000 | -0.533315000 | -1.864397000 |
| 1  | -9.688915000  | -1.874663000 | -0.409242000 |
| 1  | -11.123493000 | 0.951274000  | -3.303118000 |
| 1  | -11.393271000 | -1.144490000 | -2.006345000 |
| 6  | 6.113675000   | -0.436429000 | -0.186949000 |
| 6  | 7.236782000   | 0.401708000  | 0.156944000  |
| 6  | 8.387429000   | 0.173195000  | -0.760906000 |
| 6  | 8.255709000   | -0.991990000 | -1.531056000 |
| 6  | 9.540436000   | 0.950215000  | -0.949083000 |
| 6  | 9.208801000   | -1.425316000 | -2.439147000 |
| 6  | 10.507830000  | 0.533050000  | -1.864338000 |
| 1  | 9.688923000   | 1.874598000  | -0.409373000 |
| 6  | 10.355733000  | -0.645915000 | -2.599611000 |
| 1  | 9.057493000   | -2.335395000 | -3.009745000 |
| 1  | 11.393290000  | 1.144203000  | -2.006363000 |
| 1  | 11.123518000  | -0.951738000 | -3.302851000 |
| 6  | 7.305623000   | 1.199693000  | 1.296605000  |
| 6  | -7.305635000  | -1.199520000 | 1.296663000  |
| 6  | 6.321490000   | 1.193710000  | 2.330510000  |
| 7  | 5.557286000   | 1.224752000  | 3.209575000  |
| 6  | 8.421232000   | 2.032441000  | 1.614591000  |
| 7  | 9.298054000   | 2.740272000  | 1.911609000  |
| 6  | -6.321522000  | -1.193383000 | 2.330587000  |
| 7  | -5.557349000  | -1.224279000 | 3.209685000  |
| 6  | -8.421247000  | -2.032225000 | 1.614749000  |
| 7  | -9.298074000  | -2.740017000 | 1.911848000  |
| 16 | -6.707952000  | 1.815454000  | -1.218837000 |
| 16 | 6.707958000   | -1.815622000 | -1.218490000 |
| 8  | 6.894459000   | -3.029499000 | -0.408657000 |
| 8  | 5.935139000   | -1.906780000 | -2.465641000 |
| 8  | -5.935123000  | 1.906446000  | -2.465994000 |
| 8  | -6.894466000  | 3.029441000  | -0.409171000 |

**S9IID-CS**

E= -3084.207567 Hartree

|   |             |              |              |
|---|-------------|--------------|--------------|
| 6 | 2.763778000 | 1.211531000  | 0.555126000  |
| 6 | 1.928943000 | 0.030032000  | 0.407312000  |
| 6 | 2.586180000 | -1.182900000 | 0.028548000  |
| 6 | 3.936235000 | -1.201063000 | -0.166681000 |
| 6 | 4.765278000 | -0.025993000 | -0.005732000 |
| 6 | 4.112256000 | 1.206782000  | 0.366460000  |
| 6 | 0.609665000 | 1.855935000  | 0.949687000  |
| 6 | 0.600496000 | 0.396246000  | 0.633036000  |
| 1 | 2.005397000 | -2.089165000 | -0.068279000 |

|   |               |              |              |
|---|---------------|--------------|--------------|
| 1 | 4.407205000   | -2.137986000 | -0.448185000 |
| 1 | 4.687540000   | 2.118617000  | 0.486461000  |
| 6 | -0.600489000  | -0.396131000 | 0.633067000  |
| 6 | -1.928943000  | -0.029950000 | 0.407317000  |
| 6 | -0.609637000  | -1.855798000 | 0.949815000  |
| 6 | -2.763764000  | -1.211447000 | 0.555246000  |
| 6 | -2.586200000  | 1.182939000  | 0.028454000  |
| 6 | -4.112246000  | -1.206728000 | 0.366604000  |
| 6 | -3.936260000  | 1.201073000  | -0.166741000 |
| 1 | -2.005426000  | 2.089198000  | -0.068477000 |
| 6 | -4.765291000  | 0.026012000  | -0.005661000 |
| 1 | -4.687518000  | -2.118559000 | 0.486699000  |
| 1 | -4.407242000  | 2.137960000  | -0.448346000 |
| 8 | 0.313462000   | -2.610630000 | 1.236759000  |
| 8 | -0.313414000  | 2.610791000  | 1.236632000  |
| 7 | -1.946148000  | -2.273769000 | 0.889101000  |
| 7 | 1.946178000   | 2.273888000  | 0.888910000  |
| 6 | 2.363483000   | 3.632557000  | 1.147762000  |
| 1 | 3.057752000   | 3.678421000  | 1.994603000  |
| 1 | 2.848597000   | 4.072729000  | 0.268677000  |
| 1 | 1.465020000   | 4.202819000  | 1.387426000  |
| 6 | -2.363430000  | -3.632429000 | 1.148033000  |
| 1 | -3.057690000  | -3.678257000 | 1.994883000  |
| 1 | -2.848546000  | -4.072656000 | 0.268976000  |
| 1 | -1.464956000  | -4.202663000 | 1.387720000  |
| 6 | 6.135065000   | -0.083358000 | -0.203984000 |
| 6 | 8.603606000   | -0.857669000 | -0.735312000 |
| 6 | 8.701133000   | 0.506720000  | -0.425769000 |
| 6 | 9.746689000   | -1.586742000 | -1.072959000 |
| 6 | 9.941255000   | 1.149381000  | -0.452143000 |
| 6 | 10.982414000  | -0.941889000 | -1.098100000 |
| 1 | 9.670838000   | -2.642635000 | -1.312414000 |
| 6 | 11.079283000  | 0.418138000  | -0.789559000 |
| 1 | 10.015472000  | 2.205348000  | -0.212444000 |
| 1 | 11.872780000  | -1.504474000 | -1.359808000 |
| 1 | 12.044865000  | 0.913016000  | -0.811370000 |
| 6 | -6.135080000  | 0.083343000  | -0.203907000 |
| 6 | -8.603630000  | 0.857569000  | -0.735318000 |
| 6 | -8.701135000  | -0.506800000 | -0.425680000 |
| 6 | -9.746722000  | 1.586596000  | -1.073033000 |
| 6 | -9.941244000  | -1.149487000 | -0.452027000 |
| 6 | -10.982434000 | 0.941718000  | -1.098145000 |
| 1 | -9.670889000  | 2.642473000  | -1.312560000 |
| 6 | -11.079282000 | -0.418290000 | -0.789510000 |

|    |               |              |              |
|----|---------------|--------------|--------------|
| 1  | -10.015444000 | -2.205439000 | -0.212258000 |
| 1  | -11.872808000 | 1.504267000  | -1.359903000 |
| 1  | -12.044854000 | -0.913188000 | -0.811301000 |
| 16 | -7.190673000  | -1.323149000 | -0.011461000 |
| 16 | -6.986287000  | 1.563357000  | -0.667862000 |
| 16 | 6.986245000   | -1.563415000 | -0.667855000 |
| 16 | 7.190684000   | 1.323122000  | -0.011607000 |

**S10IID-CS**

E= -2776.890540 Hartree

|   |              |              |              |
|---|--------------|--------------|--------------|
| 6 | -2.788730000 | -1.153600000 | 0.374044000  |
| 6 | -1.930040000 | 0.010343000  | 0.227258000  |
| 6 | -2.562584000 | 1.236489000  | -0.149151000 |
| 6 | -3.912709000 | 1.282457000  | -0.343519000 |
| 6 | -4.764603000 | 0.124989000  | -0.183831000 |
| 6 | -4.137433000 | -1.120854000 | 0.186070000  |
| 6 | -0.647794000 | -1.842500000 | 0.766621000  |
| 6 | -0.608479000 | -0.383666000 | 0.451947000  |
| 1 | -1.963626000 | 2.130992000  | -0.244743000 |
| 1 | -4.364775000 | 2.229396000  | -0.623068000 |
| 1 | -4.731298000 | -2.020953000 | 0.305283000  |
| 6 | 0.608475000  | 0.383833000  | 0.451976000  |
| 6 | 1.930015000  | -0.010217000 | 0.227260000  |
| 6 | 0.647866000  | 1.842631000  | 0.766821000  |
| 6 | 2.788767000  | 1.153663000  | 0.374155000  |
| 6 | 2.562489000  | -1.236372000 | -0.149236000 |
| 6 | 4.137468000  | 1.120860000  | 0.186175000  |
| 6 | 3.912611000  | -1.282398000 | -0.343613000 |
| 1 | 1.963479000  | -2.130835000 | -0.244889000 |
| 6 | 4.764567000  | -0.124986000 | -0.183839000 |
| 1 | 4.731384000  | 2.020913000  | 0.305477000  |
| 1 | 4.364625000  | -2.229340000 | -0.623235000 |
| 8 | -0.258774000 | 2.617989000  | 1.052783000  |
| 8 | 0.258909000  | -2.617857000 | 1.052388000  |
| 7 | 1.993227000  | 2.232941000  | 0.706144000  |
| 7 | -1.993133000 | -2.232875000 | 0.705900000  |
| 6 | -2.437804000 | -3.582956000 | 0.963080000  |
| 1 | -3.132842000 | -3.616050000 | 1.809957000  |
| 1 | -2.931817000 | -4.012451000 | 0.083592000  |
| 1 | -1.550916000 | -4.171416000 | 1.201964000  |
| 6 | 2.437972000  | 3.582966000  | 0.963489000  |
| 1 | 3.133013000  | 3.615920000  | 1.810368000  |
| 1 | 2.932006000  | 4.012543000  | 0.084052000  |
| 1 | 1.551116000  | 4.171444000  | 1.202447000  |

|    |              |              |              |
|----|--------------|--------------|--------------|
| 6  | -6.134154000 | 0.210473000  | -0.381438000 |
| 6  | -8.576629000 | 1.005315000  | -0.895999000 |
| 6  | -8.696402000 | -0.295378000 | -0.601901000 |
| 6  | 6.134112000  | -0.210529000 | -0.381459000 |
| 6  | 8.576542000  | -1.005462000 | -0.896091000 |
| 6  | 8.696387000  | 0.295201000  | -0.601887000 |
| 16 | 7.230554000  | 1.169052000  | -0.193966000 |
| 16 | 6.968396000  | -1.703978000 | -0.844858000 |
| 16 | -6.968520000 | 1.703914000  | -0.844716000 |
| 16 | -7.230520000 | -1.169182000 | -0.194056000 |
| 1  | -9.626211000 | -0.850343000 | -0.594177000 |
| 1  | -9.395772000 | 1.661733000  | -1.162251000 |
| 1  | 9.395649000  | -1.661903000 | -1.162398000 |
| 1  | 9.626226000  | 0.850115000  | -0.594121000 |

**S2IID-OS**

E= -1565.650516 Hartree

|   |              |              |              |
|---|--------------|--------------|--------------|
| 6 | -2.790964000 | 1.119254000  | -0.242811000 |
| 6 | -1.983728000 | -0.052496000 | -0.140024000 |
| 6 | -2.648692000 | -1.265990000 | 0.112608000  |
| 6 | -4.031225000 | -1.290422000 | 0.235517000  |
| 6 | -4.826038000 | -0.126004000 | 0.103170000  |
| 6 | -4.166539000 | 1.104848000  | -0.140701000 |
| 6 | -0.642576000 | 1.869754000  | -0.424197000 |
| 6 | -0.592346000 | 0.360835000  | -0.248670000 |
| 1 | -2.083261000 | -2.181785000 | 0.183716000  |
| 1 | -4.513224000 | -2.248696000 | 0.389376000  |
| 1 | -4.726036000 | 2.030640000  | -0.194579000 |
| 6 | 0.592346000  | -0.360804000 | -0.248699000 |
| 6 | 1.983730000  | 0.052516000  | -0.140028000 |
| 6 | 0.642572000  | -1.869705000 | -0.424372000 |
| 6 | 2.790963000  | -1.119228000 | -0.242911000 |
| 6 | 2.648698000  | 1.265987000  | 0.112702000  |
| 6 | 4.166537000  | -1.104835000 | -0.140798000 |
| 6 | 4.031231000  | 1.290405000  | 0.235613000  |
| 1 | 2.083271000  | 2.181779000  | 0.183880000  |
| 6 | 4.826040000  | 0.125994000  | 0.103174000  |
| 1 | 4.726031000  | -2.030625000 | -0.194752000 |
| 1 | 4.513233000  | 2.248665000  | 0.389549000  |
| 8 | -0.267127000 | -2.670273000 | -0.587289000 |
| 8 | 0.267121000  | 2.670338000  | -0.587045000 |
| 7 | 1.979778000  | -2.231973000 | -0.425210000 |
| 7 | -1.979783000 | 2.232017000  | -0.425013000 |
| 6 | -2.431684000 | 3.597238000  | -0.595138000 |

|   |               |              |              |
|---|---------------|--------------|--------------|
| 1 | -3.074719000  | 3.687086000  | -1.477048000 |
| 1 | -2.985299000  | 3.938900000  | 0.286167000  |
| 1 | -1.545751000  | 4.218002000  | -0.728966000 |
| 6 | 2.431676000   | -3.597183000 | -0.595437000 |
| 1 | 3.074719000   | -3.686965000 | -1.477347000 |
| 1 | 2.985280000   | -3.938916000 | 0.285847000  |
| 1 | 1.545741000   | -4.217933000 | -0.729322000 |
| 6 | -6.279902000  | -0.186084000 | 0.213545000  |
| 6 | -7.108129000  | 0.802245000  | -0.401297000 |
| 6 | -6.923314000  | -1.233237000 | 0.942150000  |
| 6 | -8.472983000  | 0.756295000  | -0.308200000 |
| 1 | -6.643033000  | 1.584278000  | -0.992634000 |
| 6 | -8.285467000  | -1.293123000 | 1.061820000  |
| 1 | -6.312947000  | -1.974446000 | 1.446999000  |
| 6 | -9.147985000  | -0.298046000 | 0.437875000  |
| 1 | -9.102154000  | 1.495032000  | -0.794391000 |
| 1 | -8.772152000  | -2.076582000 | 1.633861000  |
| 6 | 6.279904000   | 0.186060000  | 0.213558000  |
| 6 | 7.108130000   | -0.802220000 | -0.401365000 |
| 6 | 6.923317000   | 1.233151000  | 0.942251000  |
| 6 | 8.472984000   | -0.756282000 | -0.308261000 |
| 1 | 6.643032000   | -1.584203000 | -0.992767000 |
| 6 | 8.285470000   | 1.293024000  | 1.061929000  |
| 1 | 6.312951000   | 1.974320000  | 1.447161000  |
| 6 | 9.147987000   | 0.297996000  | 0.437904000  |
| 1 | 9.102153000   | -1.494980000 | -0.794511000 |
| 1 | 8.772156000   | 2.076433000  | 1.634037000  |
| 8 | -10.392515000 | -0.345392000 | 0.536014000  |
| 8 | 10.392516000  | 0.345330000  | 0.536050000  |

**S3IID-OS**

E= -2536.394697 Hartree

|   |              |              |              |
|---|--------------|--------------|--------------|
| 6 | 2.671046000  | 1.380671000  | 0.376801000  |
| 6 | 1.977500000  | 0.136005000  | 0.271093000  |
| 6 | 2.751777000  | -1.012613000 | 0.022414000  |
| 6 | 4.130367000  | -0.911366000 | -0.083758000 |
| 6 | 4.808431000  | 0.324412000  | 0.049557000  |
| 6 | 4.040888000  | 1.495885000  | 0.279795000  |
| 6 | 0.462575000  | 1.922879000  | 0.558239000  |
| 6 | 0.555527000  | 0.415987000  | 0.378201000  |
| 1 | 2.272606000  | -1.975049000 | -0.063723000 |
| 1 | 4.700758000  | -1.816368000 | -0.265812000 |
| 1 | 4.512991000  | 2.466406000  | 0.366048000  |
| 6 | -0.555526000 | -0.415942000 | 0.378267000  |

|    |               |              |              |
|----|---------------|--------------|--------------|
| 6  | -1.977497000  | -0.135975000 | 0.271109000  |
| 6  | -0.462574000  | -1.922812000 | 0.558493000  |
| 6  | -2.671046000  | -1.380624000 | 0.377009000  |
| 6  | -2.751773000  | 1.012611000  | 0.022280000  |
| 6  | -4.040888000  | -1.495847000 | 0.280034000  |
| 6  | -4.130364000  | 0.911351000  | -0.083866000 |
| 1  | -2.272598000  | 1.975033000  | -0.063995000 |
| 6  | -4.808430000  | -0.324406000 | 0.049630000  |
| 1  | -4.512994000  | -2.466354000 | 0.366436000  |
| 1  | -4.700756000  | 1.816329000  | -0.266040000 |
| 8  | 0.519659000   | -2.631303000 | 0.719027000  |
| 8  | -0.519661000  | 2.631398000  | 0.718627000  |
| 7  | -1.759795000  | -2.409784000 | 0.565384000  |
| 7  | 1.759794000   | 2.409859000  | 0.565012000  |
| 6  | 2.080198000   | 3.812718000  | 0.738240000  |
| 1  | 2.708392000   | 3.961134000  | 1.622627000  |
| 1  | 2.600107000   | 4.205927000  | -0.141843000 |
| 1  | 1.139307000   | 4.346700000  | 0.870326000  |
| 6  | -2.080199000  | -3.812622000 | 0.738784000  |
| 1  | -2.708395000  | -3.960931000 | 1.623188000  |
| 1  | -2.600108000  | -4.205936000 | -0.141253000 |
| 1  | -1.139309000  | -4.346587000 | 0.870937000  |
| 6  | 6.244069000   | 0.403794000  | -0.050219000 |
| 6  | 7.066714000   | 1.536471000  | 0.108103000  |
| 16 | 7.269812000   | -0.969848000 | -0.402345000 |
| 1  | 6.686617000   | 2.524944000  | 0.339141000  |
| 6  | 8.683669000   | 0.097283000  | -0.304288000 |
| 6  | -6.244068000  | -0.403800000 | -0.050126000 |
| 6  | -7.066715000  | -1.536454000 | 0.108355000  |
| 16 | -7.269812000  | 0.969796000  | -0.402433000 |
| 1  | -6.686618000  | -2.524896000 | 0.339526000  |
| 6  | -8.683670000  | -0.097320000 | -0.304227000 |
| 6  | 9.996646000   | -0.364691000 | -0.500827000 |
| 6  | -9.996647000  | 0.364628000  | -0.500824000 |
| 6  | 11.097260000  | 0.527999000  | -0.414507000 |
| 7  | 12.021458000  | 1.235628000  | -0.350414000 |
| 6  | 10.254183000  | -1.729676000 | -0.789928000 |
| 7  | 10.439464000  | -2.856949000 | -1.026664000 |
| 6  | -10.254183000 | 1.729575000  | -0.790108000 |
| 7  | -10.439461000 | 2.856810000  | -1.027025000 |
| 6  | -11.097262000 | -0.528048000 | -0.414377000 |
| 7  | -12.021461000 | -1.235667000 | -0.350183000 |
| 7  | -8.380678000  | -1.374934000 | -0.027683000 |
| 7  | 8.380677000   | 1.374935000  | -0.027920000 |

S5IID-OS

E= -2011.349044 Hartree

|   |              |              |              |
|---|--------------|--------------|--------------|
| 6 | -2.785165000 | 1.130287000  | -0.339035000 |
| 6 | -1.962609000 | -0.041001000 | -0.208983000 |
| 6 | -2.615071000 | -1.251894000 | 0.114904000  |
| 6 | -3.986322000 | -1.287199000 | 0.272165000  |
| 6 | -4.804804000 | -0.126816000 | 0.096716000  |
| 6 | -4.150756000 | 1.106546000  | -0.211079000 |
| 6 | -0.642341000 | 1.866579000  | -0.592105000 |
| 6 | -0.595786000 | 0.366451000  | -0.358120000 |
| 1 | -2.040788000 | -2.160234000 | 0.213318000  |
| 1 | -4.466505000 | -2.220969000 | 0.520500000  |
| 1 | -4.709085000 | 2.030783000  | -0.283900000 |
| 6 | 0.595785000  | -0.366398000 | -0.358134000 |
| 6 | 1.962610000  | 0.041041000  | -0.208972000 |
| 6 | 0.642333000  | -1.866515000 | -0.592178000 |
| 6 | 2.785161000  | -1.130244000 | -0.339080000 |
| 6 | 2.615079000  | 1.251915000  | 0.114977000  |
| 6 | 4.150752000  | -1.106516000 | -0.211125000 |
| 6 | 3.986330000  | 1.287205000  | 0.272239000  |
| 1 | 2.040801000  | 2.160253000  | 0.213436000  |
| 6 | 4.804806000  | 0.126826000  | 0.096733000  |
| 1 | 4.709076000  | -2.030753000 | -0.283991000 |
| 1 | 4.466518000  | 2.220960000  | 0.520619000  |
| 8 | -0.271462000 | -2.646397000 | -0.807202000 |
| 8 | 0.271451000  | 2.646477000  | -0.807084000 |
| 7 | 1.980727000  | -2.233834000 | -0.577372000 |
| 7 | -1.980736000 | 2.233892000  | -0.577273000 |
| 6 | -2.434967000 | 3.593153000  | -0.795108000 |
| 1 | -3.093526000 | 3.647289000  | -1.668072000 |
| 1 | -2.970082000 | 3.970932000  | 0.082461000  |
| 1 | -1.551345000 | 4.206603000  | -0.970976000 |
| 6 | 2.434952000  | -3.593086000 | -0.795278000 |
| 1 | 3.093506000  | -3.647180000 | -1.668248000 |
| 1 | 2.970070000  | -3.970911000 | 0.082269000  |
| 1 | 1.551327000  | -4.206524000 | -0.971172000 |
| 6 | -6.240762000 | -0.174442000 | 0.194897000  |
| 6 | -6.942809000 | -1.287108000 | 0.897277000  |
| 6 | -7.037344000 | 0.842336000  | -0.376069000 |
| 6 | -8.412086000 | 0.833921000  | -0.317456000 |
| 1 | -6.563713000 | 1.646417000  | -0.925819000 |
| 6 | -9.148509000 | -0.246779000 | 0.364253000  |
| 6 | 6.240765000  | 0.174438000  | 0.194916000  |



|   |               |              |              |
|---|---------------|--------------|--------------|
| 6 | 7.037337000   | -0.842319000 | -0.376101000 |
| 6 | 6.942824000   | 1.287064000  | 0.897349000  |
| 6 | 8.412079000   | -0.833927000 | -0.317476000 |
| 1 | 6.563700000   | -1.646365000 | -0.925896000 |
| 6 | 9.148512000   | 0.246721000  | 0.364302000  |
| 6 | -9.175015000  | 1.864227000  | -0.933991000 |
| 7 | -9.758600000  | 2.730252000  | -1.449650000 |
| 8 | -6.370985000  | -2.211591000 | 1.465884000  |
| 8 | -10.368383000 | -0.271031000 | 0.433568000  |
| 7 | -8.343725000  | -1.248402000 | 0.923024000  |
| 6 | -9.005944000  | -2.354051000 | 1.628642000  |
| 1 | -8.730711000  | -3.303422000 | 1.165799000  |
| 1 | -8.682431000  | -2.373821000 | 2.671044000  |
| 1 | -10.078357000 | -2.190707000 | 1.562453000  |
| 6 | 9.174998000   | -1.864212000 | -0.934060000 |
| 7 | 9.758575000   | -2.730219000 | -1.449760000 |
| 8 | 10.368385000  | 0.270946000  | 0.433637000  |
| 8 | 6.371010000   | 2.211509000  | 1.466028000  |
| 7 | 8.343738000   | 1.248326000  | 0.923121000  |
| 6 | 9.005967000   | 2.353919000  | 1.628817000  |
| 1 | 8.730771000   | 3.303323000  | 1.166019000  |
| 1 | 8.682428000   | 2.373641000  | 2.671212000  |
| 1 | 10.078378000  | 2.190551000  | 1.562646000  |

**S8IID-OS**

E= -3112.309297 Hartree

|   |              |              |              |
|---|--------------|--------------|--------------|
| 6 | 2.814727000  | 1.051788000  | 0.494227000  |
| 6 | 1.947005000  | -0.097485000 | 0.381830000  |
| 6 | 2.547723000  | -1.340283000 | 0.044459000  |
| 6 | 3.905241000  | -1.418462000 | -0.137722000 |
| 6 | 4.767362000  | -0.275395000 | 0.023441000  |
| 6 | 4.171037000  | 0.986915000  | 0.321727000  |
| 6 | 0.706506000  | 1.843512000  | 0.816889000  |
| 6 | 0.611300000  | 0.349921000  | 0.559092000  |
| 1 | 1.938181000  | -2.227763000 | -0.031116000 |
| 1 | 4.348280000  | -2.384202000 | -0.348711000 |
| 1 | 4.775165000  | 1.882389000  | 0.367081000  |
| 6 | -0.611289000 | -0.349822000 | 0.559147000  |
| 6 | -1.946990000 | 0.097557000  | 0.381825000  |
| 6 | -0.706494000 | -1.843372000 | 0.817178000  |
| 6 | -2.814716000 | -1.051704000 | 0.494375000  |
| 6 | -2.547717000 | 1.340312000  | 0.044298000  |
| 6 | -4.171022000 | -0.986861000 | 0.321874000  |
| 6 | -3.905233000 | 1.418466000  | -0.137874000 |

|   |               |              |              |
|---|---------------|--------------|--------------|
| 1 | -1.938176000  | 2.227782000  | -0.031402000 |
| 6 | -4.767365000  | 0.275416000  | 0.023444000  |
| 1 | -4.775140000  | -1.882335000 | 0.367338000  |
| 1 | -4.348268000  | 2.384183000  | -0.348975000 |
| 8 | 0.180600000   | -2.638853000 | 1.076799000  |
| 8 | -0.180586000  | 2.639035000  | 1.076388000  |
| 7 | -2.053927000  | -2.174669000 | 0.759906000  |
| 7 | 2.053943000   | 2.174788000  | 0.759614000  |
| 6 | 2.566077000   | 3.501648000  | 1.049229000  |
| 1 | 3.265463000   | 3.462454000  | 1.889920000  |
| 1 | 3.071262000   | 3.923904000  | 0.174371000  |
| 1 | 1.713901000   | 4.129162000  | 1.309906000  |
| 6 | -2.566064000  | -3.501472000 | 1.049780000  |
| 1 | -3.265419000  | -3.462120000 | 1.890490000  |
| 1 | -3.071287000  | -3.923877000 | 0.175016000  |
| 1 | -1.713883000  | -4.128949000 | 1.310532000  |
| 6 | -6.158036000  | 0.412360000  | -0.181121000 |
| 6 | -7.271065000  | -0.397113000 | 0.213586000  |
| 6 | -8.336370000  | 0.981060000  | -1.464248000 |
| 6 | -8.467162000  | -0.149268000 | -0.643868000 |
| 6 | -9.325172000  | 1.426498000  | -2.327037000 |
| 6 | -9.663458000  | -0.876772000 | -0.731178000 |
| 6 | -10.513160000 | 0.696001000  | -2.387342000 |
| 1 | -9.171342000  | 2.309596000  | -2.937977000 |
| 6 | -10.668464000 | -0.447688000 | -1.599866000 |
| 1 | -9.821193000  | -1.772623000 | -0.148353000 |
| 1 | -11.310185000 | 1.012458000  | -3.052255000 |
| 1 | -11.587265000 | -1.021921000 | -1.661646000 |
| 6 | 6.158050000   | -0.412365000 | -0.181137000 |
| 6 | 7.271085000   | 0.397070000  | 0.213552000  |
| 6 | 8.467248000   | 0.149057000  | -0.643765000 |
| 6 | 8.336387000   | -0.981243000 | -1.464172000 |
| 6 | 9.663696000   | 0.876334000  | -0.730884000 |
| 6 | 9.325229000   | -1.426845000 | -2.326830000 |
| 6 | 10.668749000  | 0.447085000  | -1.599438000 |
| 1 | 9.821527000   | 1.772140000  | -0.148016000 |
| 6 | 10.513352000  | -0.696554000 | -2.386967000 |
| 1 | 9.171326000   | -2.309913000 | -2.937796000 |
| 1 | 11.587667000  | 1.021149000  | -1.661060000 |
| 1 | 11.310413000  | -1.013139000 | -3.051775000 |
| 6 | 7.292872000   | 1.203612000  | 1.358112000  |
| 6 | -7.292928000  | -1.203469000 | 1.358257000  |
| 6 | 6.265481000   | 1.207995000  | 2.347780000  |
| 7 | 5.470303000   | 1.250007000  | 3.198887000  |

|    |              |              |              |
|----|--------------|--------------|--------------|
| 6  | 8.393831000  | 2.031800000  | 1.726754000  |
| 7  | 9.255611000  | 2.739340000  | 2.067524000  |
| 6  | -6.265568000 | -1.207766000 | 2.347959000  |
| 7  | -5.470401000 | -1.249719000 | 3.199078000  |
| 6  | -8.393970000 | -2.031512000 | 1.727002000  |
| 7  | -9.255818000 | -2.738911000 | 2.067885000  |
| 16 | -6.736314000 | 1.738781000  | -1.284649000 |
| 16 | 6.736235000  | -1.738785000 | -1.284703000 |
| 8  | 6.821523000  | -3.017574000 | -0.561415000 |
| 8  | 6.014083000  | -1.693245000 | -2.564050000 |
| 8  | -6.014120000 | 1.693386000  | -2.563982000 |
| 8  | -6.821749000 | 3.017514000  | -0.561289000 |

**S1IID-T1** E= -1400.673786 Hartree

|   |              |              |              |
|---|--------------|--------------|--------------|
| 6 | 2.823136000  | 1.041065000  | 0.146318000  |
| 6 | 1.987158000  | -0.113750000 | 0.040667000  |
| 6 | 2.610373000  | -1.349343000 | -0.201522000 |
| 6 | 3.993357000  | -1.421655000 | -0.299795000 |
| 6 | 4.809030000  | -0.268697000 | -0.163916000 |
| 6 | 4.196080000  | 0.991904000  | 0.059086000  |
| 6 | 0.694837000  | 1.853486000  | 0.310375000  |
| 6 | 0.598281000  | 0.343029000  | 0.140076000  |
| 1 | 2.015703000  | -2.244548000 | -0.289705000 |
| 1 | 4.462778000  | -2.382512000 | -0.479836000 |
| 1 | 4.800241000  | 1.886941000  | 0.149605000  |
| 6 | -0.598275000 | -0.343042000 | 0.140103000  |
| 6 | -1.987151000 | 0.113738000  | 0.040676000  |
| 6 | -0.694837000 | -1.853487000 | 0.310502000  |
| 6 | -2.823136000 | -1.041058000 | 0.146473000  |
| 6 | -2.610361000 | 1.349310000  | -0.201634000 |
| 6 | -4.196082000 | -0.991894000 | 0.059282000  |
| 6 | -3.993347000 | 1.421623000  | -0.299877000 |
| 1 | -2.015689000 | 2.244502000  | -0.289927000 |
| 6 | -4.809028000 | 0.268688000  | -0.163843000 |
| 1 | -4.800249000 | -1.886915000 | 0.149919000  |
| 1 | -4.462765000 | 2.382464000  | -0.480010000 |
| 8 | 0.193129000  | -2.678106000 | 0.460202000  |
| 8 | -0.193136000 | 2.678119000  | 0.459959000  |
| 7 | -2.040871000 | -2.173004000 | 0.325619000  |
| 7 | 2.040867000  | 2.173023000  | 0.325372000  |
| 6 | 2.535703000  | 3.526198000  | 0.494729000  |
| 1 | 3.170765000  | 3.596390000  | 1.383427000  |

|   |              |              |              |
|---|--------------|--------------|--------------|
| 1 | 3.110826000  | 3.840863000  | -0.382112000 |
| 1 | 1.669939000  | 4.176971000  | 0.614544000  |
| 6 | -2.535714000 | -3.526151000 | 0.495172000  |
| 1 | -3.170718000 | -3.596230000 | 1.383920000  |
| 1 | -3.110899000 | -3.840913000 | -0.381594000 |
| 1 | -1.669951000 | -4.176923000 | 0.615003000  |
| 6 | 6.239666000  | -0.374725000 | -0.258953000 |
| 6 | -6.239665000 | 0.374719000  | -0.258846000 |
| 6 | 7.069340000  | 0.765186000  | -0.127390000 |
| 7 | 7.727703000  | 1.723425000  | -0.015188000 |
| 6 | 6.881547000  | -1.615667000 | -0.489024000 |
| 7 | 7.400265000  | -2.644442000 | -0.679702000 |
| 6 | -6.881542000 | 1.615641000  | -0.489037000 |
| 7 | -7.400255000 | 2.644399000  | -0.679817000 |
| 6 | -7.069347000 | -0.765169000 | -0.127124000 |
| 7 | -7.727716000 | -1.723387000 | -0.014789000 |

**S2IID-T1**

E= -1565.648637 Hartree

|   |              |              |              |
|---|--------------|--------------|--------------|
| 6 | -2.792873000 | 1.113533000  | -0.210621000 |
| 6 | -1.993167000 | -0.058836000 | -0.113721000 |
| 6 | -2.661071000 | -1.271454000 | 0.112858000  |
| 6 | -4.049419000 | -1.294896000 | 0.216306000  |
| 6 | -4.833348000 | -0.128870000 | 0.091455000  |
| 6 | -4.172219000 | 1.102026000  | -0.125285000 |
| 6 | -0.642609000 | 1.871359000  | -0.356182000 |
| 6 | -0.589620000 | 0.357646000  | -0.203659000 |
| 1 | -2.098779000 | -2.188930000 | 0.182732000  |
| 1 | -4.537955000 | -2.253099000 | 0.351814000  |
| 1 | -4.731702000 | 2.028448000  | -0.175392000 |
| 6 | 0.589618000  | -0.357773000 | -0.203694000 |
| 6 | 1.993149000  | 0.058745000  | -0.113726000 |
| 6 | 0.642657000  | -1.871469000 | -0.356375000 |
| 6 | 2.792896000  | -1.113585000 | -0.210726000 |
| 6 | 2.661005000  | 1.271371000  | 0.112945000  |
| 6 | 4.172242000  | -1.102034000 | -0.125385000 |
| 6 | 4.049352000  | 1.294857000  | 0.216398000  |
| 1 | 2.098676000  | 2.188821000  | 0.182888000  |
| 6 | 4.833323000  | 0.128868000  | 0.091457000  |
| 1 | 4.731759000  | -2.028431000 | -0.175571000 |
| 1 | 4.537853000  | 2.253068000  | 0.351980000  |
| 8 | -0.265947000 | -2.678009000 | -0.493642000 |
| 8 | 0.266029000  | 2.677879000  | -0.493341000 |
| 7 | 1.979085000  | -2.229780000 | -0.368954000 |

|   |               |              |              |
|---|---------------|--------------|--------------|
| 7 | -1.979025000  | 2.229715000  | -0.368742000 |
| 6 | -2.431681000  | 3.596675000  | -0.522167000 |
| 1 | -3.065699000  | 3.698770000  | -1.409261000 |
| 1 | -2.995693000  | 3.922981000  | 0.358374000  |
| 1 | -1.545848000  | 4.221346000  | -0.636617000 |
| 6 | 2.431788000   | -3.596710000 | -0.522509000 |
| 1 | 3.065816000   | -3.698698000 | -1.409608000 |
| 1 | 2.995804000   | -3.923082000 | 0.358005000  |
| 1 | 1.545977000   | -4.221399000 | -0.637027000 |
| 6 | -6.296983000  | -0.186011000 | 0.182617000  |
| 6 | -7.111526000  | 0.764263000  | -0.498733000 |
| 6 | -6.944827000  | -1.191950000 | 0.957026000  |
| 6 | -8.480022000  | 0.720939000  | -0.423530000 |
| 1 | -6.634466000  | 1.514069000  | -1.121949000 |
| 6 | -8.311039000  | -1.249915000 | 1.057233000  |
| 1 | -6.337575000  | -1.902349000 | 1.508448000  |
| 6 | -9.162077000  | -0.292592000 | 0.367010000  |
| 1 | -9.102982000  | 1.431513000  | -0.957319000 |
| 1 | -8.806006000  | -2.003144000 | 1.661819000  |
| 6 | 6.296957000   | 0.186056000  | 0.182627000  |
| 6 | 7.111535000   | -0.764133000 | -0.498798000 |
| 6 | 6.944763000   | 1.191957000  | 0.957118000  |
| 6 | 8.480029000   | -0.720766000 | -0.423589000 |
| 1 | 6.634503000   | -1.513907000 | -1.122075000 |
| 6 | 8.310972000   | 1.249963000  | 1.057331000  |
| 1 | 6.337483000   | 1.902289000  | 1.508596000  |
| 6 | 9.162045000   | 0.292727000  | 0.367033000  |
| 1 | 9.103016000   | -1.431274000 | -0.957434000 |
| 1 | 8.805911000   | 2.003161000  | 1.661979000  |
| 8 | -10.410852000 | -0.337835000 | 0.448177000  |
| 8 | 10.410819000  | 0.338009000  | 0.448206000  |

**S3IID-T1**

E= -2536.392805 Hartree

|   |             |              |              |
|---|-------------|--------------|--------------|
| 6 | 2.680769000 | 1.360712000  | 0.385665000  |
| 6 | 1.988495000 | 0.119933000  | 0.284855000  |
| 6 | 2.759667000 | -1.030304000 | 0.058769000  |
| 6 | 4.144320000 | -0.934303000 | -0.030943000 |
| 6 | 4.818181000 | 0.298173000  | 0.097248000  |
| 6 | 4.054607000 | 1.472368000  | 0.302667000  |
| 6 | 0.472552000 | 1.921925000  | 0.528093000  |
| 6 | 0.555188000 | 0.409594000  | 0.372720000  |
| 1 | 2.279661000 | -1.992421000 | -0.022693000 |
| 1 | 4.715976000 | -1.844399000 | -0.181055000 |

|    |               |              |              |
|----|---------------|--------------|--------------|
| 1  | 4.529597000   | 2.443733000  | 0.363719000  |
| 6  | -0.555185000  | -0.409607000 | 0.372825000  |
| 6  | -1.988487000  | -0.119942000 | 0.284920000  |
| 6  | -0.472576000  | -1.921904000 | 0.528564000  |
| 6  | -2.680783000  | -1.360685000 | 0.386005000  |
| 6  | -2.759636000  | 1.030264000  | 0.058599000  |
| 6  | -4.054624000  | -1.472332000 | 0.303039000  |
| 6  | -4.144292000  | 0.934272000  | -0.031080000 |
| 1  | -2.279610000  | 1.992353000  | -0.023073000 |
| 6  | -4.818176000  | -0.298165000 | 0.097376000  |
| 1  | -4.529634000  | -2.443673000 | 0.364300000  |
| 1  | -4.715931000  | 1.844348000  | -0.181379000 |
| 8  | 0.505129000   | -2.641985000 | 0.662864000  |
| 8  | -0.505166000  | 2.642011000  | 0.662270000  |
| 7  | -1.772036000  | -2.398377000 | 0.546571000  |
| 7  | 1.772004000   | 2.398423000  | 0.546011000  |
| 6  | 2.100278000   | 3.801586000  | 0.700661000  |
| 1  | 2.719518000   | 3.959282000  | 1.589765000  |
| 1  | 2.633560000   | 4.176859000  | -0.179271000 |
| 1  | 1.161922000   | 4.344354000  | 0.813096000  |
| 6  | -2.100332000  | -3.801504000 | 0.701501000  |
| 1  | -2.719583000  | -3.959010000 | 1.590630000  |
| 1  | -2.633613000  | -4.176947000 | -0.178360000 |
| 1  | -1.161986000  | -4.344263000 | 0.814055000  |
| 6  | 6.263953000   | 0.379027000  | 0.019966000  |
| 6  | 7.092256000   | 1.452704000  | 0.380698000  |
| 16 | 7.271837000   | -0.924142000 | -0.559520000 |
| 1  | 6.720244000   | 2.383985000  | 0.792065000  |
| 6  | 8.698141000   | 0.087395000  | -0.260547000 |
| 6  | -6.263950000  | -0.379007000 | 0.020121000  |
| 6  | -7.092271000  | -1.452587000 | 0.381097000  |
| 16 | -7.271811000  | 0.924052000  | -0.559650000 |
| 1  | -6.720275000  | -2.383784000 | 0.792670000  |
| 6  | -8.698134000  | -0.087390000 | -0.260443000 |
| 6  | 10.010686000  | -0.357034000 | -0.525992000 |
| 6  | -10.010671000 | 0.357004000  | -0.525980000 |
| 6  | 11.121627000  | 0.490662000  | -0.281720000 |
| 7  | 12.054506000  | 1.163954000  | -0.091537000 |
| 6  | 10.251670000  | -1.655313000 | -1.042251000 |
| 7  | 10.424377000  | -2.728426000 | -1.467017000 |
| 6  | -10.251634000 | 1.655173000  | -1.042527000 |
| 7  | -10.424322000 | 2.728195000  | -1.467531000 |
| 6  | -11.121628000 | -0.490616000 | -0.281513000 |
| 7  | -12.054519000 | -1.163848000 | -0.091176000 |

|   |              |              |             |
|---|--------------|--------------|-------------|
| 7 | -8.410895000 | -1.297002000 | 0.230870000 |
| 7 | 8.410881000  | 1.297111000  | 0.230497000 |

**S4IID-T1**

E= -2468.430183 Hartree

|    |              |              |              |
|----|--------------|--------------|--------------|
| 6  | 2.762328000  | 1.193178000  | 0.274520000  |
| 6  | 1.990220000  | -0.003519000 | 0.176369000  |
| 6  | 2.686928000  | -1.198059000 | -0.066581000 |
| 6  | 4.072394000  | -1.197500000 | -0.176064000 |
| 6  | 4.832011000  | -0.001602000 | -0.049325000 |
| 6  | 4.134362000  | 1.219060000  | 0.176500000  |
| 6  | 0.591280000  | 1.885866000  | 0.452207000  |
| 6  | 0.579808000  | 0.375047000  | 0.281116000  |
| 1  | 2.145827000  | -2.127383000 | -0.148601000 |
| 1  | 4.595917000  | -2.125893000 | -0.356539000 |
| 1  | 4.670668000  | 2.157623000  | 0.260816000  |
| 6  | -0.579799000 | -0.374995000 | 0.281193000  |
| 6  | -1.990213000 | 0.003551000  | 0.176406000  |
| 6  | -0.591264000 | -1.885785000 | 0.452539000  |
| 6  | -2.762319000 | -1.193126000 | 0.274816000  |
| 6  | -2.686929000 | 1.198044000  | -0.066751000 |
| 6  | -4.134357000 | -1.219027000 | 0.176849000  |
| 6  | -4.072398000 | 1.197465000  | -0.176190000 |
| 1  | -2.145832000 | 2.127354000  | -0.148966000 |
| 6  | -4.832013000 | 0.001592000  | -0.049192000 |
| 1  | -4.670661000 | -2.157572000 | 0.261369000  |
| 1  | -4.595927000 | 2.125824000  | -0.356826000 |
| 8  | 0.338985000  | -2.662451000 | 0.611284000  |
| 8  | -0.338969000 | 2.662569000  | 0.610776000  |
| 7  | -1.918156000 | -2.281731000 | 0.457605000  |
| 7  | 1.918171000  | 2.281819000  | 0.457121000  |
| 6  | 2.333698000  | 3.659020000  | 0.624263000  |
| 1  | 2.970451000  | 3.767957000  | 1.508565000  |
| 1  | 2.883090000  | 4.010251000  | -0.255930000 |
| 1  | 1.431602000  | 4.257430000  | 0.751292000  |
| 6  | -2.333680000 | -3.658896000 | 0.625057000  |
| 1  | -2.970398000 | -3.767643000 | 1.509408000  |
| 1  | -2.883109000 | -4.010313000 | -0.255038000 |
| 1  | -1.431581000 | -4.257281000 | 0.752176000  |
| 6  | -6.257565000 | 0.007768000  | -0.148706000 |
| 6  | -7.113646000 | 1.174572000  | -0.397469000 |
| 16 | -7.223786000 | -1.446831000 | 0.018571000  |
| 6  | -8.774730000 | -0.528827000 | -0.240247000 |
| 6  | 6.257560000  | -0.007797000 | -0.148886000 |

|    |               |              |              |
|----|---------------|--------------|--------------|
| 6  | 7.113634000   | -1.174648000 | -0.397447000 |
| 16 | 7.223786000   | 1.446836000  | 0.018070000  |
| 6  | 8.774722000   | 0.528782000  | -0.240615000 |
| 8  | -6.775628000  | 2.340587000  | -0.563189000 |
| 8  | 6.775612000   | -2.340697000 | -0.562925000 |
| 8  | 9.867065000   | 1.044402000  | -0.235185000 |
| 8  | -9.867073000  | -1.044445000 | -0.234679000 |
| 6  | -9.510490000  | 1.795828000  | -0.667020000 |
| 1  | -9.478746000  | 2.556346000  | 0.116182000  |
| 1  | -9.348433000  | 2.280428000  | -1.632211000 |
| 1  | -10.470487000 | 1.282023000  | -0.657264000 |
| 6  | 9.510470000   | -1.795956000 | -0.666953000 |
| 1  | 9.478665000   | -2.556386000 | 0.116331000  |
| 1  | 9.348459000   | -2.280661000 | -1.632100000 |
| 1  | 10.470477000  | -1.282169000 | -0.657204000 |
| 7  | -8.470492000  | 0.798427000  | -0.432509000 |
| 7  | 8.470479000   | -0.798511000 | -0.432603000 |

**S5IID-T1** E= -2011.344607 Hartree

|   |              |              |              |
|---|--------------|--------------|--------------|
| 6 | -2.789304000 | 1.119933000  | -0.243960000 |
| 6 | -1.988749000 | -0.054390000 | -0.130923000 |
| 6 | -2.651252000 | -1.261649000 | 0.132096000  |
| 6 | -4.038270000 | -1.291480000 | 0.248020000  |
| 6 | -4.826552000 | -0.125493000 | 0.092832000  |
| 6 | -4.164448000 | 1.106555000  | -0.152649000 |
| 6 | -0.637901000 | 1.872435000  | -0.405915000 |
| 6 | -0.587625000 | 0.360125000  | -0.232023000 |
| 1 | -2.087623000 | -2.176463000 | 0.223643000  |
| 1 | -4.529067000 | -2.232099000 | 0.448337000  |
| 1 | -4.720122000 | 2.034512000  | -0.211431000 |
| 6 | 0.587625000  | -0.360108000 | -0.232050000 |
| 6 | 1.988750000  | 0.054399000  | -0.130919000 |
| 6 | 0.637900000  | -1.872406000 | -0.406041000 |
| 6 | 2.789304000  | -1.119917000 | -0.244035000 |
| 6 | 2.651254000  | 1.261640000  | 0.132186000  |
| 6 | 4.164448000  | -1.106547000 | -0.152723000 |
| 6 | 4.038271000  | 1.291461000  | 0.248113000  |
| 1 | 2.087624000  | 2.176446000  | 0.223799000  |
| 6 | 4.826553000  | 0.125484000  | 0.092842000  |
| 1 | 4.720121000  | -2.034500000 | -0.211566000 |
| 1 | 4.529069000  | 2.232065000  | 0.448495000  |
| 8 | -0.274012000 | -2.669878000 | -0.559982000 |
| 8 | 0.274009000  | 2.669917000  | -0.559811000 |



|   |               |              |              |
|---|---------------|--------------|--------------|
| 7 | 1.974467000   | -2.231586000 | -0.421894000 |
| 7 | -1.974469000  | 2.231614000  | -0.421747000 |
| 6 | -2.426269000  | 3.597454000  | -0.596322000 |
| 1 | -3.062436000  | 3.684864000  | -1.483225000 |
| 1 | -2.986326000  | 3.937963000  | 0.281116000  |
| 1 | -1.540435000  | 4.219418000  | -0.723757000 |
| 6 | 2.426267000   | -3.597414000 | -0.596566000 |
| 1 | 3.062433000   | -3.684761000 | -1.483476000 |
| 1 | 2.986324000   | -3.937985000 | 0.280847000  |
| 1 | 1.540433000   | -4.219369000 | -0.724044000 |
| 6 | -6.282980000  | -0.163181000 | 0.139165000  |
| 6 | -6.997575000  | -1.204197000 | 0.926400000  |
| 6 | -7.047458000  | 0.785794000  | -0.551216000 |
| 6 | -8.432528000  | 0.779033000  | -0.528912000 |
| 1 | -6.550276000  | 1.532967000  | -1.159167000 |
| 6 | -9.186187000  | -0.233745000 | 0.233813000  |
| 6 | 6.282980000   | 0.163168000  | 0.139178000  |
| 6 | 7.047459000   | -0.785760000 | -0.551267000 |
| 6 | 6.997575000   | 1.204130000  | 0.926485000  |
| 6 | 8.432528000   | -0.778998000 | -0.528964000 |
| 1 | 6.550277000   | -1.532892000 | -1.159268000 |
| 6 | 9.186188000   | 0.233730000  | 0.233828000  |
| 6 | -9.177946000  | 1.741705000  | -1.259554000 |
| 7 | -9.748105000  | 2.553612000  | -1.870983000 |
| 8 | -6.428005000  | -2.063284000 | 1.591300000  |
| 8 | -10.408410000 | -0.254161000 | 0.268721000  |
| 7 | -8.398508000  | -1.173576000 | 0.910317000  |
| 6 | -9.077671000  | -2.209666000 | 1.700157000  |
| 1 | -8.786995000  | -3.197573000 | 1.338414000  |
| 1 | -8.783842000  | -2.127264000 | 2.748281000  |
| 1 | -10.148324000 | -2.059469000 | 1.588933000  |
| 6 | 9.177947000   | -1.741620000 | -1.259672000 |
| 7 | 9.748106000   | -2.553485000 | -1.871157000 |
| 8 | 10.408410000  | 0.254147000  | 0.268733000  |
| 8 | 6.428004000   | 2.063178000  | 1.591435000  |
| 7 | 8.398508000   | 1.173515000  | 0.910396000  |
| 6 | 9.077671000   | 2.209555000  | 1.700302000  |
| 1 | 8.786994000   | 3.197484000  | 1.338622000  |
| 1 | 8.783842000   | 2.127086000  | 2.748420000  |
| 1 | 10.148324000  | 2.059366000  | 1.589068000  |

S6IID-T1

E= -2733.973544 Hartree

|   |              |              |              |
|---|--------------|--------------|--------------|
| 6 | 2.753882000  | -1.213134000 | -0.229599000 |
| 6 | 1.988004000  | -0.011670000 | -0.130124000 |
| 6 | 2.691770000  | 1.175325000  | 0.120444000  |
| 6 | 4.074592000  | 1.151343000  | 0.246815000  |
| 6 | 4.837985000  | -0.051602000 | 0.118023000  |
| 6 | 4.124077000  | -1.259661000 | -0.132533000 |
| 6 | 0.577956000  | -1.894129000 | -0.412951000 |
| 6 | 0.574947000  | -0.380175000 | -0.239731000 |
| 1 | 2.163680000  | 2.112975000  | 0.190081000  |
| 1 | 4.591467000  | 2.081164000  | 0.425754000  |
| 1 | 4.659177000  | -2.190689000 | -0.228184000 |
| 6 | -0.574948000 | 0.380212000  | -0.239713000 |
| 6 | -1.988001000 | 0.011692000  | -0.130112000 |
| 6 | -0.577967000 | 1.894175000  | -0.412850000 |
| 6 | -2.753890000 | 1.213150000  | -0.229573000 |
| 6 | -2.691756000 | -1.175316000 | 0.120427000  |
| 6 | -4.124087000 | 1.259660000  | -0.132525000 |
| 6 | -4.074579000 | -1.151351000 | 0.246786000  |
| 1 | -2.163657000 | -2.112963000 | 0.190052000  |
| 6 | -4.837981000 | 0.051587000  | 0.118000000  |
| 1 | -4.659197000 | 2.190682000  | -0.228172000 |
| 1 | -4.591448000 | -2.081180000 | 0.425713000  |
| 8 | 0.360393000  | 2.658578000  | -0.578787000 |
| 8 | -0.360415000 | -2.658527000 | -0.578841000 |
| 7 | -1.900263000 | 2.295780000  | -0.412502000 |
| 7 | 1.900247000  | -2.295753000 | -0.412552000 |
| 6 | 2.313010000  | -3.674204000 | -0.589816000 |
| 1 | 2.967512000  | -3.769981000 | -1.461732000 |
| 1 | 2.846263000  | -4.035673000 | 0.295554000  |
| 1 | 1.411695000  | -4.267968000 | -0.740230000 |
| 6 | -2.313039000 | 3.674225000  | -0.589780000 |
| 1 | -2.967512000 | 3.769995000  | -1.461719000 |
| 1 | -2.846327000 | 4.035685000  | 0.295572000  |
| 1 | -1.411727000 | 4.268002000  | -0.740161000 |
| 6 | 6.278541000  | -0.019412000 | 0.203008000  |
| 6 | 6.950877000  | 1.058201000  | 0.939078000  |
| 6 | 7.095664000  | -1.063154000 | -0.426199000 |
| 6 | 9.140984000  | 0.230472000  | 0.125903000  |
| 6 | -6.278535000 | 0.019376000  | 0.202969000  |
| 6 | -7.095664000 | 1.063125000  | -0.426215000 |
| 6 | -6.950852000 | -1.058270000 | 0.939005000  |
| 6 | -9.140981000 | -0.230480000 | 0.125951000  |
| 8 | 6.359577000  | 1.869313000  | 1.646539000  |
| 7 | 8.356900000  | 1.132847000  | 0.819450000  |

|    |               |              |              |
|----|---------------|--------------|--------------|
| 6  | 9.017602000   | 2.251907000  | 1.512760000  |
| 1  | 8.240714000   | 2.825962000  | 2.008627000  |
| 1  | 9.734764000   | 1.865491000  | 2.238135000  |
| 1  | 9.555337000   | 2.866288000  | 0.789595000  |
| 8  | -6.359523000  | -1.869427000 | 1.646389000  |
| 7  | -8.356880000  | -1.132902000 | 0.819418000  |
| 6  | -9.017570000  | -2.251988000 | 1.512696000  |
| 1  | -8.240671000  | -2.826081000 | 2.008503000  |
| 1  | -9.734697000  | -1.865601000 | 2.238120000  |
| 1  | -9.555343000  | -2.866324000 | 0.789520000  |
| 8  | -6.635655000  | 2.077183000  | -0.946533000 |
| 8  | 6.635645000   | -2.077139000 | -0.946650000 |
| 7  | 8.492117000   | -0.846112000 | -0.451807000 |
| 7  | -8.492125000  | 0.846119000  | -0.451743000 |
| 6  | 9.300384000   | -1.852875000 | -1.161025000 |
| 1  | 10.020601000  | -2.298594000 | -0.473530000 |
| 1  | 8.616218000   | -2.604753000 | -1.542183000 |
| 1  | 9.849128000   | -1.377357000 | -1.974661000 |
| 6  | -9.300417000  | 1.852940000  | -1.160851000 |
| 1  | -10.020575000 | 2.298641000  | -0.473282000 |
| 1  | -8.616260000  | 2.604821000  | -1.542018000 |
| 1  | -9.849229000  | 1.377477000  | -1.974473000 |
| 16 | -10.800192000 | -0.419009000 | 0.009648000  |
| 16 | 10.800185000  | 0.419038000  | 0.009523000  |

**S7IID-T1** E= -2241.859932 Hartree

|   |              |              |              |
|---|--------------|--------------|--------------|
| 6 | 2.848723000  | -0.961214000 | -0.116200000 |
| 6 | 1.981512000  | 0.170434000  | -0.039489000 |
| 6 | 2.569734000  | 1.422045000  | 0.199634000  |
| 6 | 3.950035000  | 1.530585000  | 0.321701000  |
| 6 | 4.806095000  | 0.402076000  | 0.195174000  |
| 6 | 4.217111000  | -0.873781000 | 0.001424000  |
| 6 | 0.748148000  | -1.834229000 | -0.315594000 |
| 6 | 0.607600000  | -0.325801000 | -0.148339000 |
| 1 | 1.952907000  | 2.304141000  | 0.264530000  |
| 1 | 4.390538000  | 2.500828000  | 0.502154000  |
| 1 | 4.827757000  | -1.766391000 | -0.022193000 |
| 6 | -0.607630000 | 0.325939000  | -0.148317000 |
| 6 | -1.981544000 | -0.170304000 | -0.039513000 |
| 6 | -0.748179000 | 1.834377000  | -0.315491000 |
| 6 | -2.848751000 | 0.961354000  | -0.116112000 |
| 6 | -2.569764000 | -1.421932000 | 0.199526000  |
| 6 | -4.217139000 | 0.873915000  | 0.001537000  |

|   |               |              |              |
|---|---------------|--------------|--------------|
| 6 | -3.950065000  | -1.530476000 | 0.321606000  |
| 1 | -1.952939000  | -2.304033000 | 0.264360000  |
| 6 | -4.806118000  | -0.401959000 | 0.195162000  |
| 1 | -4.827783000  | 1.766529000  | -0.021968000 |
| 1 | -4.390568000  | -2.500730000 | 0.502007000  |
| 8 | 0.113923000   | 2.680569000  | -0.494562000 |
| 8 | -0.113950000  | -2.680400000 | -0.494794000 |
| 7 | -2.101217000  | 2.117719000  | -0.292291000 |
| 7 | 2.101189000   | -2.117564000 | -0.292478000 |
| 6 | 2.642064000   | -3.442946000 | -0.525631000 |
| 1 | 3.312319000   | -3.429991000 | -1.390867000 |
| 1 | 3.190435000   | -3.800601000 | 0.352445000  |
| 1 | 1.801308000   | -4.108303000 | -0.720700000 |
| 6 | -2.642094000  | 3.443126000  | -0.525302000 |
| 1 | -3.312403000  | 3.430242000  | -1.390497000 |
| 1 | -3.190406000  | 3.800718000  | 0.352838000  |
| 1 | -1.801343000  | 4.108490000  | -0.720370000 |
| 6 | -6.230173000  | -0.564501000 | 0.325967000  |
| 6 | -6.836987000  | -1.586217000 | 1.246972000  |
| 6 | -7.305712000  | 0.225922000  | -0.210890000 |
| 6 | -8.274068000  | -1.241144000 | 1.353640000  |
| 6 | -8.555962000  | -0.145109000 | 0.519116000  |
| 6 | -9.240605000  | -1.848428000 | 2.141871000  |
| 6 | -9.853158000  | 0.370809000  | 0.487467000  |
| 6 | -10.537895000 | -1.330551000 | 2.104957000  |
| 1 | -8.976441000  | -2.697713000 | 2.763726000  |
| 6 | -10.830419000 | -0.232244000 | 1.289955000  |
| 1 | -10.121349000 | 1.218723000  | -0.127543000 |
| 1 | -11.320702000 | -1.776711000 | 2.710284000  |
| 1 | -11.839688000 | 0.167503000  | 1.274036000  |
| 6 | 6.230155000   | 0.564586000  | 0.325940000  |
| 6 | 7.305627000   | -0.225943000 | -0.210896000 |
| 6 | 6.837086000   | 1.586242000  | 1.246952000  |
| 6 | 8.555913000   | 0.144981000  | 0.519054000  |
| 6 | 8.274144000   | 1.241032000  | 1.353588000  |
| 6 | 9.853052000   | -0.371060000 | 0.487314000  |
| 6 | 9.240774000   | 1.848207000  | 2.141788000  |
| 6 | 10.830408000  | 0.231885000  | 1.289766000  |
| 1 | 10.121112000  | -1.218991000 | -0.127744000 |
| 6 | 10.538015000  | 1.330203000  | 2.104805000  |
| 1 | 8.976723000   | 2.697513000  | 2.763662000  |
| 1 | 11.839640000  | -0.167953000 | 1.273790000  |
| 1 | 11.320891000  | 1.776281000  | 2.710103000  |
| 8 | -6.269577000  | -2.500003000 | 1.825922000  |

|   |              |              |              |
|---|--------------|--------------|--------------|
| 8 | 6.269783000  | 2.500038000  | 1.825991000  |
| 6 | 7.264110000  | -1.077945000 | -1.316893000 |
| 6 | -7.264211000 | 1.077872000  | -1.316941000 |
| 6 | 6.146975000  | -1.226209000 | -2.192817000 |
| 7 | 5.287110000  | -1.390534000 | -2.962191000 |
| 6 | 8.395295000  | -1.831975000 | -1.751093000 |
| 7 | 9.289224000  | -2.478522000 | -2.128012000 |
| 6 | -6.147035000 | 1.226194000  | -2.192805000 |
| 7 | -5.287138000 | 1.390616000  | -2.962123000 |
| 6 | -8.395391000 | 1.831816000  | -1.751309000 |
| 7 | -9.289095000 | 2.478430000  | -2.128647000 |

**S8IID-T1** E= -3112.304325 Hartree

|   |              |              |              |
|---|--------------|--------------|--------------|
| 6 | 2.817798000  | 1.045303000  | 0.285655000  |
| 6 | 1.986379000  | -0.111192000 | 0.203220000  |
| 6 | 2.610212000  | -1.344972000 | -0.035113000 |
| 6 | 3.993549000  | -1.412403000 | -0.154698000 |
| 6 | 4.807809000  | -0.258952000 | -0.028815000 |
| 6 | 4.190409000  | 0.998793000  | 0.172675000  |
| 6 | 0.692400000  | 1.856432000  | 0.470506000  |
| 6 | 0.597398000  | 0.343702000  | 0.307182000  |
| 1 | 2.020269000  | -2.245013000 | -0.101270000 |
| 1 | 4.461254000  | -2.377949000 | -0.308199000 |
| 1 | 4.779833000  | 1.906003000  | 0.203635000  |
| 6 | -0.597405000 | -0.343661000 | 0.307238000  |
| 6 | -1.986386000 | 0.111219000  | 0.203219000  |
| 6 | -0.692409000 | -1.856363000 | 0.470817000  |
| 6 | -2.817803000 | -1.045267000 | 0.285781000  |
| 6 | -2.610217000 | 1.344967000  | -0.035287000 |
| 6 | -4.190412000 | -0.998775000 | 0.172760000  |
| 6 | -3.993552000 | 1.412380000  | -0.154904000 |
| 1 | -2.020273000 | 2.245000000  | -0.101555000 |
| 6 | -4.807811000 | 0.258944000  | -0.028893000 |
| 1 | -4.779834000 | -1.905983000 | 0.203816000  |
| 1 | -4.461256000 | 2.377906000  | -0.308540000 |
| 8 | 0.194591000  | -2.678086000 | 0.638494000  |
| 8 | -0.194593000 | 2.678164000  | 0.638174000  |
| 7 | -2.037075000 | -2.179187000 | 0.457342000  |
| 7 | 2.037069000  | 2.179244000  | 0.457071000  |
| 6 | 2.534990000  | 3.525024000  | 0.667026000  |
| 1 | 3.191992000  | 3.554885000  | 1.542008000  |
| 1 | 3.084859000  | 3.878572000  | -0.211587000 |
| 1 | 1.672014000  | 4.168811000  | 0.835492000  |

|    |               |              |              |
|----|---------------|--------------|--------------|
| 6  | -2.534997000  | -3.524949000 | 0.667408000  |
| 1  | -3.192044000  | -3.554725000 | 1.542357000  |
| 1  | -3.084817000  | -3.878592000 | -0.211198000 |
| 1  | -1.672025000  | -4.168712000 | 0.835985000  |
| 6  | -6.238872000  | 0.372623000  | -0.178632000 |
| 6  | -7.313009000  | -0.353199000 | 0.375865000  |
| 6  | -8.503971000  | 0.889705000  | -1.329042000 |
| 6  | -8.599464000  | -0.110192000 | -0.349972000 |
| 6  | -9.567151000  | 1.311997000  | -2.110470000 |
| 6  | -9.849167000  | -0.720438000 | -0.174372000 |
| 6  | -10.803377000 | 0.692506000  | -1.916580000 |
| 1  | -9.435538000  | 2.095065000  | -2.849624000 |
| 6  | -10.931893000 | -0.315406000 | -0.958929000 |
| 1  | -9.997252000  | -1.506431000 | 0.551471000  |
| 1  | -11.659326000 | 0.992522000  | -2.512173000 |
| 1  | -11.892003000 | -0.800298000 | -0.814366000 |
| 6  | 6.238873000   | -0.372652000 | -0.178510000 |
| 6  | 7.312999000   | 0.353241000  | 0.375917000  |
| 6  | 8.599467000   | 0.110148000  | -0.349868000 |
| 6  | 8.503994000   | -0.889869000 | -1.328816000 |
| 6  | 9.849164000   | 0.720420000  | -0.174320000 |
| 6  | 9.567190000   | -1.312254000 | -2.110173000 |
| 6  | 10.931906000  | 0.315295000  | -0.958807000 |
| 1  | 9.997232000   | 1.506503000  | 0.551431000  |
| 6  | 10.803410000  | -0.692735000 | -1.916337000 |
| 1  | 9.435593000   | -2.095413000 | -2.849233000 |
| 1  | 11.892011000  | 0.800209000  | -0.814286000 |
| 1  | 11.659371000  | -0.992820000 | -2.511878000 |
| 6  | 7.212212000   | 1.127158000  | 1.557322000  |
| 6  | -7.212242000  | -1.126967000 | 1.557370000  |
| 6  | 6.090785000   | 1.092898000  | 2.434898000  |
| 7  | 5.223192000   | 1.105160000  | 3.214032000  |
| 6  | 8.252484000   | 1.957909000  | 2.057538000  |
| 7  | 9.060031000   | 2.671958000  | 2.504969000  |
| 6  | -6.090828000  | -1.092596000 | 2.434960000  |
| 7  | -5.223247000  | -1.104749000 | 3.214108000  |
| 6  | -8.252522000  | -1.957653000 | 2.057680000  |
| 7  | -9.060069000  | -2.671646000 | 2.505198000  |
| 16 | -6.848251000  | 1.530639000  | -1.437560000 |
| 16 | 6.848278000   | -1.530822000 | -1.437284000 |
| 8  | 6.782431000   | -2.914834000 | -0.940215000 |
| 8  | 6.252937000   | -1.209955000 | -2.741461000 |
| 8  | -6.252887000  | 1.209608000  | -2.741686000 |
| 8  | -6.782408000  | 2.914712000  | -0.940660000 |

S9IID-T1

E= -3084.189991 Hartree

|   |              |              |              |
|---|--------------|--------------|--------------|
| 6 | 2.780793000  | 1.159171000  | 0.299340000  |
| 6 | 1.989822000  | -0.024803000 | 0.208410000  |
| 6 | 2.679123000  | -1.229797000 | -0.021706000 |
| 6 | 4.060956000  | -1.240987000 | -0.127387000 |
| 6 | 4.843266000  | -0.056681000 | -0.011846000 |
| 6 | 4.154374000  | 1.173653000  | 0.202582000  |
| 6 | 0.615357000  | 1.872879000  | 0.474755000  |
| 6 | 0.587865000  | 0.369127000  | 0.310836000  |
| 1 | 2.126974000  | -2.153710000 | -0.096074000 |
| 1 | 4.554550000  | -2.192528000 | -0.297867000 |
| 1 | 4.697225000  | 2.109191000  | 0.279824000  |
| 6 | -0.587861000 | -0.369099000 | 0.310813000  |
| 6 | -1.989819000 | 0.024821000  | 0.208343000  |
| 6 | -0.615342000 | -1.872856000 | 0.474678000  |
| 6 | -2.780785000 | -1.159151000 | 0.299337000  |
| 6 | -2.679128000 | 1.229804000  | -0.021807000 |
| 6 | -4.154368000 | -1.173640000 | 0.202610000  |
| 6 | -4.060962000 | 1.240984000  | -0.127474000 |
| 1 | -2.126986000 | 2.153718000  | -0.096209000 |
| 6 | -4.843266000 | 0.056681000  | -0.011870000 |
| 1 | -4.697215000 | -2.109175000 | 0.279911000  |
| 1 | -4.554562000 | 2.192517000  | -0.297983000 |
| 8 | 0.302688000  | -2.669619000 | 0.628925000  |
| 8 | -0.302679000 | 2.669673000  | 0.628806000  |
| 7 | -1.948969000 | -2.258188000 | 0.474585000  |
| 7 | 1.948981000  | 2.258220000  | 0.474534000  |
| 6 | 2.375395000  | 3.630726000  | 0.631072000  |
| 1 | 3.015261000  | 3.743530000  | 1.513385000  |
| 1 | 2.926704000  | 3.974377000  | -0.251673000 |
| 1 | 1.477218000  | 4.236092000  | 0.755531000  |
| 6 | -2.375381000 | -3.630678000 | 0.631272000  |
| 1 | -3.015190000 | -3.743405000 | 1.513636000  |
| 1 | -2.926750000 | -3.974398000 | -0.251408000 |
| 1 | -1.477199000 | -4.236039000 | 0.755720000  |
| 6 | 6.258925000  | -0.095344000 | -0.110040000 |
| 6 | 8.759950000  | -0.852882000 | -0.396398000 |
| 6 | 8.811102000  | 0.535474000  | -0.195449000 |
| 6 | 9.938287000  | -1.579576000 | -0.588384000 |
| 6 | 10.039544000 | 1.201542000  | -0.185863000 |
| 6 | 11.161155000 | -0.910852000 | -0.577932000 |
| 1 | 9.898453000  | -2.653048000 | -0.743764000 |

|    |               |              |              |
|----|---------------|--------------|--------------|
| 6  | 11.211656000  | 0.472024000  | -0.377823000 |
| 1  | 10.077779000  | 2.275081000  | -0.030452000 |
| 1  | 12.078007000  | -1.472170000 | -0.726740000 |
| 1  | 12.167659000  | 0.985675000  | -0.371076000 |
| 6  | -6.258927000  | 0.095335000  | -0.110042000 |
| 6  | -8.759960000  | 0.852854000  | -0.396394000 |
| 6  | -8.811104000  | -0.535493000 | -0.195381000 |
| 6  | -9.938302000  | 1.579536000  | -0.588393000 |
| 6  | -10.039544000 | -1.201565000 | -0.185746000 |
| 6  | -11.161168000 | 0.910809000  | -0.577891000 |
| 1  | -9.898473000  | 2.653002000  | -0.743822000 |
| 6  | -11.211661000 | -0.472058000 | -0.377720000 |
| 1  | -10.077773000 | -2.275097000 | -0.030286000 |
| 1  | -12.078023000 | 1.472118000  | -0.726709000 |
| 1  | -12.167663000 | -0.985711000 | -0.370934000 |
| 16 | -7.260972000  | -1.348679000 | 0.038791000  |
| 16 | -7.154860000  | 1.588797000  | -0.388144000 |
| 16 | 7.154849000   | -1.588820000 | -0.388090000 |
| 16 | 7.260976000   | 1.348675000  | 0.038713000  |

**S10IID-T1**

E= -2776.873527 Hartree

|   |              |              |              |
|---|--------------|--------------|--------------|
| 6 | -2.800840000 | -1.110175000 | 0.208385000  |
| 6 | -1.988982000 | 0.059558000  | 0.117901000  |
| 6 | -2.657556000 | 1.276390000  | -0.111483000 |
| 6 | -4.039004000 | 1.311727000  | -0.217373000 |
| 6 | -4.841802000 | 0.141496000  | -0.102647000 |
| 6 | -4.174685000 | -1.100456000 | 0.111399000  |
| 6 | -0.648153000 | -1.861318000 | 0.384150000  |
| 6 | -0.594518000 | -0.358806000 | 0.220454000  |
| 1 | -2.089385000 | 2.190635000  | -0.185222000 |
| 1 | -4.516047000 | 2.271926000  | -0.387226000 |
| 1 | -4.733893000 | -2.026452000 | 0.188423000  |
| 6 | 0.594516000  | 0.358785000  | 0.220450000  |
| 6 | 1.988978000  | -0.059565000 | 0.117803000  |
| 6 | 0.648148000  | 1.861291000  | 0.384203000  |
| 6 | 2.800839000  | 1.110152000  | 0.208465000  |
| 6 | 2.657551000  | -1.276367000 | -0.111747000 |
| 6 | 4.174686000  | 1.100441000  | 0.111507000  |
| 6 | 4.038999000  | -1.311692000 | -0.217633000 |
| 1 | 2.089382000  | -2.190603000 | -0.185606000 |
| 6 | 4.841800000  | -0.141480000 | -0.102725000 |
| 1 | 4.733897000  | 2.026423000  | 0.188686000  |
| 1 | 4.516041000  | -2.271868000 | -0.387617000 |



|    |              |              |              |
|----|--------------|--------------|--------------|
| 8  | -0.255440000 | 2.674630000  | 0.538530000  |
| 8  | 0.255449000  | -2.674701000 | 0.538169000  |
| 7  | 1.988645000  | 2.223575000  | 0.383653000  |
| 7  | -1.988644000 | -2.223624000 | 0.383398000  |
| 6  | -2.438633000 | -3.588491000 | 0.539274000  |
| 1  | -3.080081000 | -3.691025000 | 1.421753000  |
| 1  | -2.996145000 | -3.922264000 | -0.343420000 |
| 1  | -1.550934000 | -4.209293000 | 0.663048000  |
| 6  | 2.438639000  | 3.588411000  | 0.539784000  |
| 1  | 3.080028000  | 3.690799000  | 1.422323000  |
| 1  | 2.996216000  | 3.922317000  | -0.342819000 |
| 1  | 1.550939000  | 4.209203000  | 0.663593000  |
| 6  | -6.256918000 | 0.204794000  | -0.201138000 |
| 6  | -8.731043000 | 0.975004000  | -0.477449000 |
| 6  | -8.803430000 | -0.349621000 | -0.286085000 |
| 6  | 6.256917000  | -0.204769000 | -0.201205000 |
| 6  | 8.731042000  | -0.974947000 | -0.477600000 |
| 6  | 8.803432000  | 0.349648000  | -0.286028000 |
| 16 | 7.296438000  | 1.216701000  | -0.055685000 |
| 16 | 7.139258000  | -1.709905000 | -0.479977000 |
| 16 | -7.139262000 | 1.709969000  | -0.479688000 |
| 16 | -7.296435000 | -1.216704000 | -0.055855000 |
| 1  | -9.720674000 | -0.924739000 | -0.261531000 |
| 1  | -9.582417000 | 1.626710000  | -0.630194000 |
| 1  | 9.582416000  | -1.626634000 | -0.630434000 |
| 1  | 9.720679000  | 0.924757000  | -0.261373000 |

**S1IIDT-CS** E=-2504.314091 Hartree

|   |              |              |              |
|---|--------------|--------------|--------------|
| 6 | 2.633679000  | 1.458210000  | 0.571177000  |
| 6 | 1.929760000  | 0.200811000  | 0.423871000  |
| 6 | 2.706399000  | -0.941364000 | 0.069586000  |
| 6 | 4.059500000  | -0.824543000 | -0.095199000 |
| 6 | 4.756577000  | 0.422792000  | 0.075742000  |
| 6 | 3.985170000  | 1.584136000  | 0.415112000  |
| 6 | 0.426485000  | 1.917413000  | 0.898749000  |
| 6 | 0.556464000  | 0.442466000  | 0.611066000  |
| 1 | 2.222647000  | -1.900622000 | -0.039994000 |
| 1 | 4.628039000  | -1.709930000 | -0.360449000 |
| 1 | 4.462606000  | 2.547973000  | 0.538242000  |
| 6 | -0.556459000 | -0.442417000 | 0.611028000  |
| 6 | -1.929754000 | -0.200778000 | 0.423799000  |
| 6 | -0.426455000 | -1.917382000 | 0.898601000  |
| 6 | -2.633665000 | -1.458177000 | 0.571145000  |

|    |               |              |              |
|----|---------------|--------------|--------------|
| 6  | -2.706406000  | 0.941382000  | 0.069492000  |
| 6  | -3.985158000  | -1.584114000 | 0.415111000  |
| 6  | -4.059508000  | 0.824548000  | -0.095276000 |
| 1  | -2.222665000  | 1.900643000  | -0.040110000 |
| 6  | -4.756576000  | -0.422785000 | 0.075713000  |
| 1  | -4.462588000  | -2.547950000 | 0.538275000  |
| 1  | -4.628056000  | 1.709925000  | -0.360541000 |
| 8  | 0.570210000   | -2.577953000 | 1.151066000  |
| 8  | -0.570188000  | 2.578021000  | 1.151085000  |
| 7  | -1.715313000  | -2.447858000 | 0.868249000  |
| 7  | 1.715335000   | 2.447903000  | 0.868268000  |
| 6  | 2.006108000   | 3.845137000  | 1.116117000  |
| 1  | 2.670826000   | 3.958589000  | 1.978906000  |
| 1  | 2.471826000   | 4.309831000  | 0.240383000  |
| 1  | 1.057560000   | 4.340262000  | 1.325222000  |
| 6  | -2.006083000  | -3.845077000 | 1.116194000  |
| 1  | -2.670746000  | -3.958480000 | 1.979032000  |
| 1  | -2.471862000  | -4.309811000 | 0.240513000  |
| 1  | -1.057525000  | -4.340200000 | 1.325261000  |
| 6  | 6.149704000   | 0.505311000  | -0.090893000 |
| 6  | 6.982480000   | 1.653601000  | 0.045062000  |
| 16 | 7.144202000   | -0.897459000 | -0.523863000 |
| 6  | 8.313655000   | 1.427775000  | -0.180777000 |
| 1  | 6.588368000   | 2.627161000  | 0.308111000  |
| 6  | 8.612639000   | 0.069422000  | -0.512823000 |
| 1  | 9.090002000   | 2.180797000  | -0.122093000 |
| 6  | -6.149706000  | -0.505316000 | -0.090900000 |
| 6  | -6.982473000  | -1.653608000 | 0.045100000  |
| 16 | -7.144218000  | 0.897435000  | -0.523894000 |
| 6  | -8.313653000  | -1.427796000 | -0.180727000 |
| 1  | -6.588352000  | -2.627157000 | 0.308172000  |
| 6  | -8.612649000  | -0.069454000 | -0.512809000 |
| 1  | -9.089994000  | -2.180820000 | -0.122011000 |
| 6  | -9.866474000  | 0.459928000  | -0.794561000 |
| 6  | 9.866457000   | -0.459975000 | -0.794576000 |
| 6  | -11.016540000 | -0.378811000 | -0.767616000 |
| 7  | -11.941637000 | -1.087423000 | -0.738849000 |
| 6  | -10.039709000 | 1.834596000  | -1.114575000 |
| 7  | -10.152429000 | 2.965591000  | -1.374284000 |
| 6  | 10.039680000  | -1.834654000 | -1.114553000 |
| 7  | 10.152393000  | -2.965661000 | -1.374211000 |
| 6  | 11.016530000  | 0.378756000  | -0.767666000 |
| 7  | 11.941632000  | 1.087364000  | -0.738930000 |

S2IIDT-CS

E=-2669.279874 Hartree

|    |              |              |              |
|----|--------------|--------------|--------------|
| 6  | -2.565378000 | 1.575548000  | -0.660993000 |
| 6  | -1.932694000 | 0.286864000  | -0.531796000 |
| 6  | -2.772791000 | -0.812349000 | -0.212588000 |
| 6  | -4.125790000 | -0.625506000 | -0.061060000 |
| 6  | -4.748668000 | 0.653176000  | -0.213403000 |
| 6  | -3.913728000 | 1.772628000  | -0.518205000 |
| 6  | -0.332159000 | 1.938150000  | -0.946181000 |
| 6  | -0.532424000 | 0.464659000  | -0.694657000 |
| 1  | -2.344366000 | -1.798622000 | -0.116202000 |
| 1  | -4.742961000 | -1.485633000 | 0.177840000  |
| 1  | -4.334730000 | 2.764399000  | -0.627159000 |
| 6  | 0.532424000  | -0.464686000 | -0.694649000 |
| 6  | 1.932693000  | -0.286885000 | -0.531794000 |
| 6  | 0.332163000  | -1.938182000 | -0.946150000 |
| 6  | 2.565381000  | -1.575570000 | -0.660966000 |
| 6  | 2.772788000  | 0.812337000  | -0.212609000 |
| 6  | 3.913731000  | -1.772643000 | -0.518173000 |
| 6  | 4.125787000  | 0.625501000  | -0.061077000 |
| 1  | 2.344361000  | 1.798611000  | -0.116243000 |
| 6  | 4.748668000  | -0.653183000 | -0.213394000 |
| 1  | 4.334735000  | -2.764416000 | -0.627109000 |
| 1  | 4.742956000  | 1.485634000  | 0.177806000  |
| 8  | -0.694221000 | -2.565007000 | -1.172702000 |
| 8  | 0.694227000  | 2.564970000  | -1.172738000 |
| 7  | 1.594684000  | -2.526771000 | -0.924208000 |
| 7  | -1.594679000 | 2.526743000  | -0.924250000 |
| 6  | -1.814997000 | 3.939713000  | -1.145350000 |
| 1  | -2.462493000 | 4.103943000  | -2.013488000 |
| 1  | -2.270576000 | 4.409210000  | -0.266370000 |
| 1  | -0.840898000 | 4.392605000  | -1.331946000 |
| 6  | 1.815005000  | -3.939745000 | -1.145278000 |
| 1  | 2.462503000  | -4.103992000 | -2.013411000 |
| 1  | 2.270582000  | -4.409224000 | -0.266287000 |
| 1  | 0.840907000  | -4.392643000 | -1.331866000 |
| 6  | -6.149330000 | 0.814893000  | -0.062650000 |
| 6  | -6.910612000 | 2.001108000  | -0.186380000 |
| 16 | -7.224841000 | -0.526985000 | 0.328438000  |
| 6  | -8.262796000 | 1.841103000  | 0.019689000  |
| 1  | -6.462637000 | 2.957389000  | -0.425827000 |
| 6  | -8.658116000 | 0.510040000  | 0.320939000  |
| 1  | -8.970144000 | 2.657988000  | -0.042088000 |
| 6  | 6.149331000  | -0.814894000 | -0.062638000 |

|    |               |              |              |
|----|---------------|--------------|--------------|
| 6  | 6.910615000   | -2.001109000 | -0.186344000 |
| 16 | 7.224838000   | 0.526993000  | 0.328427000  |
| 6  | 8.262799000   | -1.841098000 | 0.019723000  |
| 1  | 6.462643000   | -2.957397000 | -0.425773000 |
| 6  | 8.658115000   | -0.510028000 | 0.320948000  |
| 1  | 8.970149000   | -2.657982000 | -0.042039000 |
| 6  | -9.948587000  | 0.022253000  | 0.580683000  |
| 6  | -10.188947000 | -1.368994000 | 0.872425000  |
| 6  | -11.092806000 | 0.902253000  | 0.565761000  |
| 6  | -11.435650000 | -1.843877000 | 1.124969000  |
| 1  | -9.343860000  | -2.052416000 | 0.889026000  |
| 6  | -12.347286000 | 0.446733000  | 0.815820000  |
| 1  | -10.943593000 | 1.954991000  | 0.348923000  |
| 6  | -12.613930000 | -0.965938000 | 1.115635000  |
| 1  | -11.611338000 | -2.892213000 | 1.343944000  |
| 1  | -13.205182000 | 1.111425000  | 0.803879000  |
| 6  | 9.948585000   | -0.022233000 | 0.580685000  |
| 6  | 11.092806000  | -0.902231000 | 0.565780000  |
| 6  | 10.188942000  | 1.369020000  | 0.872401000  |
| 6  | 12.347285000  | -0.446703000 | 0.815831000  |
| 1  | 10.943597000  | -1.954974000 | 0.348961000  |
| 6  | 11.435643000  | 1.843910000  | 1.124938000  |
| 1  | 9.343852000   | 2.052439000  | 0.888989000  |
| 6  | 12.613925000  | 0.965974000  | 1.115620000  |
| 1  | 13.205183000  | -1.111393000 | 0.803904000  |
| 1  | 11.611328000  | 2.892250000  | 1.343895000  |
| 8  | -13.753155000 | -1.389409000 | 1.344914000  |
| 8  | 13.753149000  | 1.389452000  | 1.344894000  |

**S3IIDT-CS**

E=-3640.020104 Hartree

|   |              |              |              |
|---|--------------|--------------|--------------|
| 6 | -2.577675000 | -1.550701000 | 0.714778000  |
| 6 | -1.944559000 | -0.266385000 | 0.590688000  |
| 6 | -2.781207000 | 0.836858000  | 0.295103000  |
| 6 | -4.140842000 | 0.657291000  | 0.163077000  |
| 6 | -4.762315000 | -0.616574000 | 0.313832000  |
| 6 | -3.931944000 | -1.740825000 | 0.592085000  |
| 6 | -0.345176000 | -1.940964000 | 0.958140000  |
| 6 | -0.533586000 | -0.456031000 | 0.730917000  |
| 1 | -2.351309000 | 1.821940000  | 0.198052000  |
| 1 | -4.755469000 | 1.523892000  | -0.058239000 |
| 1 | -4.355027000 | -2.731824000 | 0.698134000  |
| 6 | 0.533579000  | 0.456146000  | 0.730793000  |
| 6 | 1.944550000  | 0.266479000  | 0.590559000  |

|    |               |              |              |
|----|---------------|--------------|--------------|
| 6  | 0.345160000   | 1.941129000  | 0.957666000  |
| 6  | 2.577666000   | 1.550813000  | 0.714462000  |
| 6  | 2.781200000   | -0.836807000 | 0.295142000  |
| 6  | 3.931937000   | 1.740918000  | 0.591760000  |
| 6  | 4.140836000   | -0.657259000 | 0.163095000  |
| 1  | 2.351308000   | -1.821906000 | 0.198247000  |
| 6  | 4.762310000   | 0.616627000  | 0.313674000  |
| 1  | 4.355020000   | 2.731932000  | 0.697670000  |
| 1  | 4.755464000   | -1.523892000 | -0.058090000 |
| 8  | -0.677970000  | 2.579158000  | 1.158784000  |
| 8  | 0.677969000   | -2.578987000 | 1.159198000  |
| 7  | 1.611558000   | 2.514515000  | 0.950576000  |
| 7  | -1.611567000  | -2.514366000 | 0.951042000  |
| 6  | -1.843900000  | -3.929084000 | 1.157502000  |
| 1  | -2.477403000  | -4.096222000 | 2.034958000  |
| 1  | -2.320064000  | -4.379977000 | 0.280111000  |
| 1  | -0.872489000  | -4.396042000 | 1.320646000  |
| 6  | 1.843900000   | 3.929246000  | 1.156940000  |
| 1  | 2.477346000   | 4.096446000  | 2.034426000  |
| 1  | 2.320131000   | 4.380057000  | 0.279544000  |
| 1  | 0.872485000   | 4.396233000  | 1.319977000  |
| 6  | -6.175054000  | -0.773186000 | 0.185621000  |
| 6  | -6.936226000  | -1.951189000 | 0.310245000  |
| 16 | -7.241978000  | 0.583014000  | -0.172546000 |
| 6  | -8.297430000  | -1.779016000 | 0.128648000  |
| 1  | -6.491575000  | -2.913050000 | 0.531840000  |
| 6  | -8.673338000  | -0.447447000 | -0.149041000 |
| 1  | -9.021122000  | -2.583335000 | 0.191413000  |
| 6  | 6.175051000   | 0.773217000  | 0.185462000  |
| 6  | 6.936225000   | 1.951235000  | 0.309937000  |
| 16 | 7.241976000   | -0.583035000 | -0.172505000 |
| 6  | 8.297431000   | 1.779033000  | 0.128384000  |
| 1  | 6.491573000   | 2.913126000  | 0.531397000  |
| 6  | 8.673339000   | 0.447425000  | -0.149119000 |
| 1  | 9.021124000   | 2.583357000  | 0.191051000  |
| 6  | -9.960495000  | 0.053309000  | -0.380484000 |
| 6  | -10.337954000 | 1.394710000  | -0.659305000 |
| 16 | -11.416989000 | -0.934646000 | -0.367978000 |
| 1  | -9.617506000  | 2.205443000  | -0.722006000 |
| 6  | -12.367702000 | 0.530213000  | -0.732681000 |
| 6  | 9.960498000   | -0.053367000 | -0.380475000 |
| 6  | 10.337956000  | -1.394808000 | -0.659106000 |
| 16 | 11.416994000  | 0.934585000  | -0.368082000 |
| 1  | 9.617507000   | -2.205547000 | -0.721707000 |

|   |               |              |              |
|---|---------------|--------------|--------------|
| 6 | 12.367708000  | -0.530327000 | -0.732570000 |
| 6 | 13.751023000  | -0.506038000 | -0.882564000 |
| 6 | -13.751015000 | 0.505899000  | -0.882691000 |
| 6 | 14.473630000  | -1.695887000 | -1.173412000 |
| 7 | 15.094560000  | -2.652567000 | -1.411799000 |
| 6 | 14.471881000  | 0.710933000  | -0.748157000 |
| 7 | 15.033809000  | 1.726282000  | -0.631709000 |
| 6 | -14.471871000 | -0.711055000 | -0.748129000 |
| 7 | -15.033797000 | -1.726391000 | -0.631551000 |
| 6 | -14.473621000 | 1.695707000  | -1.173712000 |
| 7 | -15.094550000 | 2.652352000  | -1.412238000 |
| 7 | -11.616523000 | 1.651410000  | -0.846993000 |
| 7 | 11.616527000  | -1.651537000 | -0.846740000 |

**S4IIDT-CS** E=-3572.076281 Hartree

|   |              |              |              |
|---|--------------|--------------|--------------|
| 6 | -2.532756000 | 1.629392000  | -0.832155000 |
| 6 | -1.915211000 | 0.328867000  | -0.692501000 |
| 6 | -2.768614000 | -0.757420000 | -0.344554000 |
| 6 | -4.111898000 | -0.549051000 | -0.175419000 |
| 6 | -4.722888000 | 0.741902000  | -0.336090000 |
| 6 | -3.872530000 | 1.847293000  | -0.671712000 |
| 6 | -0.297625000 | 1.939934000  | -1.160215000 |
| 6 | -0.525526000 | 0.478755000  | -0.879381000 |
| 1 | -2.351765000 | -1.748555000 | -0.243247000 |
| 1 | -4.739378000 | -1.395234000 | 0.084825000  |
| 1 | -4.281201000 | 2.843317000  | -0.788207000 |
| 6 | 0.525526000  | -0.478730000 | -0.879392000 |
| 6 | 1.915213000  | -0.328846000 | -0.692520000 |
| 6 | 0.297624000  | -1.939904000 | -1.160251000 |
| 6 | 2.532754000  | -1.629371000 | -0.832184000 |
| 6 | 2.768619000  | 0.757437000  | -0.344564000 |
| 6 | 3.872528000  | -1.847277000 | -0.671745000 |
| 6 | 4.111903000  | 0.549063000  | -0.175434000 |
| 1 | 2.351773000  | 1.748571000  | -0.243246000 |
| 6 | 4.722890000  | -0.741891000 | -0.336117000 |
| 1 | 4.281196000  | -2.843301000 | -0.788249000 |
| 1 | 4.739386000  | 1.395242000  | 0.084816000  |
| 8 | -0.739442000 | -2.538661000 | -1.412503000 |
| 8 | 0.739436000  | 2.538693000  | -1.412481000 |
| 7 | 1.548503000  | -2.556451000 | -1.125768000 |
| 7 | -1.548508000 | 2.556476000  | -1.125734000 |
| 6 | -1.743153000 | 3.969819000  | -1.365966000 |
| 1 | -2.400004000 | 4.134529000  | -2.227046000 |

|    |               |              |              |
|----|---------------|--------------|--------------|
| 1  | -2.175628000  | 4.462617000  | -0.488012000 |
| 1  | -0.762623000  | 4.399169000  | -1.573922000 |
| 6  | 1.743143000   | -3.969793000 | -1.366004000 |
| 1  | 2.399997000   | -4.134504000 | -2.227082000 |
| 1  | 2.175615000   | -4.462596000 | -0.488051000 |
| 1  | 0.762613000   | -4.399139000 | -1.573964000 |
| 6  | -6.109512000  | 0.919245000  | -0.163971000 |
| 6  | -6.850520000  | 2.128366000  | -0.296661000 |
| 16 | -7.196617000  | -0.412327000 | 0.268387000  |
| 6  | -8.193309000  | 1.998052000  | -0.068241000 |
| 1  | -6.387648000  | 3.071478000  | -0.558692000 |
| 6  | -8.601402000  | 0.666096000  | 0.262556000  |
| 1  | -8.902991000  | 2.815201000  | -0.127128000 |
| 6  | 6.109514000   | -0.919239000 | -0.164002000 |
| 6  | 6.850519000   | -2.128360000 | -0.296706000 |
| 16 | 7.196623000   | 0.412327000  | 0.268363000  |
| 6  | 8.193308000   | -1.998052000 | -0.068285000 |
| 1  | 6.387645000   | -3.071468000 | -0.558746000 |
| 6  | 8.601404000   | -0.666100000 | 0.262529000  |
| 1  | 8.902988000   | -2.815202000 | -0.127179000 |
| 6  | -9.877624000  | 0.239176000  | 0.541293000  |
| 6  | -10.210391000 | -1.147269000 | 0.872350000  |
| 16 | -11.316081000 | 1.266776000  | 0.549359000  |
| 6  | -12.366898000 | -0.149009000 | 0.993755000  |
| 6  | 9.877627000   | -0.239188000 | 0.541274000  |
| 6  | 10.210397000  | 1.147255000  | 0.872338000  |
| 16 | 11.316081000  | -1.266791000 | 0.549329000  |
| 6  | 12.366893000  | 0.148974000  | 0.993797000  |
| 7  | -11.585911000 | -1.282911000 | 1.106119000  |
| 7  | 11.585912000  | 1.282881000  | 1.106154000  |
| 6  | -12.191523000 | -2.563485000 | 1.456253000  |
| 1  | -12.936247000 | -2.844050000 | 0.708135000  |
| 1  | -11.389404000 | -3.300160000 | 1.485305000  |
| 1  | -12.678084000 | -2.494889000 | 2.431741000  |
| 6  | 12.191521000  | 2.563444000  | 1.456332000  |
| 1  | 12.936275000  | 2.844015000  | 0.708245000  |
| 1  | 11.389408000  | 3.300125000  | 1.485366000  |
| 1  | 12.678047000  | 2.494828000  | 2.431836000  |
| 8  | -13.561138000 | -0.084077000 | 1.160012000  |
| 8  | -9.415596000  | -2.077318000 | 0.941790000  |
| 8  | 9.415601000   | 2.077298000  | 0.941814000  |
| 8  | 13.561130000  | 0.084035000  | 1.160069000  |

S5IIDT-CS

E=-3115.001862 Hartree

|    |              |              |              |
|----|--------------|--------------|--------------|
| 6  | -2.537219000 | 1.618336000  | -0.869689000 |
| 6  | -1.918713000 | 0.319299000  | -0.727652000 |
| 6  | -2.768654000 | -0.769602000 | -0.383027000 |
| 6  | -4.114168000 | -0.565615000 | -0.222136000 |
| 6  | -4.725908000 | 0.723426000  | -0.388867000 |
| 6  | -3.880123000 | 1.831108000  | -0.718255000 |
| 6  | -0.303795000 | 1.942660000  | -1.181881000 |
| 6  | -0.526378000 | 0.474655000  | -0.905917000 |
| 1  | -2.349618000 | -1.758928000 | -0.275907000 |
| 1  | -4.740276000 | -1.412899000 | 0.036051000  |
| 1  | -4.292592000 | 2.825006000  | -0.837454000 |
| 6  | 0.526375000  | -0.474088000 | -0.905926000 |
| 6  | 1.918732000  | -0.318830000 | -0.727695000 |
| 6  | 0.303668000  | -1.942085000 | -1.181808000 |
| 6  | 2.537120000  | -1.617936000 | -0.869653000 |
| 6  | 2.768780000  | 0.770000000  | -0.383104000 |
| 6  | 3.880005000  | -1.830826000 | -0.718215000 |
| 6  | 4.114277000  | 0.565896000  | -0.222220000 |
| 1  | 2.349841000  | 1.759366000  | -0.276001000 |
| 6  | 4.725898000  | -0.723206000 | -0.388902000 |
| 1  | 4.292377000  | -2.824772000 | -0.837347000 |
| 1  | 4.740465000  | 1.413132000  | 0.035933000  |
| 8  | -0.732706000 | -2.541804000 | -1.425746000 |
| 8  | 0.732479000  | 2.542419000  | -1.426146000 |
| 7  | 1.556505000  | -2.550584000 | -1.155649000 |
| 7  | -1.556692000 | 2.551040000  | -1.155807000 |
| 6  | -1.758907000 | 3.965001000  | -1.396087000 |
| 1  | -2.410249000 | 4.124629000  | -2.261791000 |
| 1  | -2.200561000 | 4.452119000  | -0.520041000 |
| 1  | -0.780375000 | 4.401880000  | -1.596541000 |
| 6  | 1.758581000  | -3.964600000 | -1.395722000 |
| 1  | 2.409916000  | -4.124415000 | -2.261398000 |
| 1  | 2.200180000  | -4.451637000 | -0.519603000 |
| 1  | 0.780008000  | -4.401409000 | -1.596124000 |
| 6  | -6.118618000 | 0.896148000  | -0.225709000 |
| 6  | -6.860662000 | 2.098165000  | -0.364126000 |
| 16 | -7.199809000 | -0.439993000 | 0.200587000  |
| 6  | -8.206481000 | 1.951688000  | -0.141899000 |
| 1  | -6.408608000 | 3.047239000  | -0.623768000 |
| 6  | -8.603755000 | 0.619996000  | 0.186352000  |
| 1  | -8.910432000 | 2.771257000  | -0.208662000 |
| 6  | 6.118593000  | -0.896051000 | -0.225744000 |
| 6  | 6.860524000  | -2.098143000 | -0.364114000 |



|    |               |              |              |
|----|---------------|--------------|--------------|
| 16 | 7.199914000   | 0.440013000  | 0.200464000  |
| 6  | 8.206357000   | -1.951783000 | -0.141891000 |
| 1  | 6.408380000   | -3.047186000 | -0.623710000 |
| 6  | 8.603755000   | -0.620117000 | 0.186312000  |
| 1  | 8.910229000   | -2.771422000 | -0.208612000 |
| 6  | 9.906028000   | -0.179666000 | 0.462956000  |
| 6  | 11.024471000  | -1.053972000 | 0.444795000  |
| 6  | 10.130794000  | 1.240924000  | 0.785485000  |
| 6  | 12.291273000  | -0.610853000 | 0.717142000  |
| 1  | 10.886233000  | -2.103330000 | 0.210524000  |
| 6  | 12.564435000  | 0.801588000  | 1.044629000  |
| 6  | -9.905990000  | 0.179430000  | 0.462993000  |
| 6  | -11.024516000 | 1.053628000  | 0.444789000  |
| 6  | -10.130626000 | -1.241174000 | 0.785554000  |
| 6  | -12.291282000 | 0.610394000  | 0.717120000  |
| 1  | -10.886375000 | 2.102993000  | 0.210489000  |
| 6  | -12.564312000 | -0.802061000 | 1.044655000  |
| 6  | 13.400092000  | -1.505921000 | 0.693655000  |
| 7  | 14.276389000  | -2.271637000 | 0.663309000  |
| 6  | -13.400189000 | 1.505351000  | 0.693568000  |
| 7  | -14.276562000 | 2.270979000  | 0.663168000  |
| 8  | 9.210633000   | 2.059981000  | 0.821536000  |
| 8  | -9.210402000  | -2.060162000 | 0.821542000  |
| 8  | -13.683744000 | -1.223745000 | 1.291400000  |
| 8  | 13.683890000  | 1.223152000  | 1.291476000  |
| 7  | 11.435600000  | 1.644080000  | 1.054555000  |
| 7  | -11.435403000 | -1.644455000 | 1.054576000  |
| 6  | -11.629219000 | -3.064570000 | 1.372060000  |
| 1  | -11.288368000 | -3.679318000 | 0.536641000  |
| 1  | -11.043547000 | -3.328722000 | 2.254816000  |
| 1  | -12.689666000 | -3.218069000 | 1.554545000  |
| 6  | 11.629535000  | 3.064169000  | 1.372086000  |
| 1  | 11.288858000  | 3.678972000  | 0.536635000  |
| 1  | 11.043779000  | 3.328369000  | 2.254772000  |
| 1  | 12.689976000  | 3.217547000  | 1.554702000  |

**S6IIDT-CS** E=-3837.648393 Hartree

|   |              |              |             |
|---|--------------|--------------|-------------|
| 6 | -2.515970000 | -1.652325000 | 0.985113000 |
| 6 | -1.908247000 | -0.345521000 | 0.839391000 |
| 6 | -2.767333000 | 0.734920000  | 0.480311000 |
| 6 | -4.106736000 | 0.516330000  | 0.308427000 |
| 6 | -4.709245000 | -0.781079000 | 0.476547000 |
| 6 | -3.853197000 | -1.879560000 | 0.822225000 |

|    |              |              |              |
|----|--------------|--------------|--------------|
| 6  | -0.281615000 | -1.943688000 | 1.322579000  |
| 6  | -0.521686000 | -0.483045000 | 1.031613000  |
| 1  | -2.356321000 | 1.727781000  | 0.372669000  |
| 1  | -4.740667000 | 1.354306000  | 0.039570000  |
| 1  | -4.258160000 | -2.876192000 | 0.943490000  |
| 6  | 0.521689000  | 0.483066000  | 1.031620000  |
| 6  | 1.908252000  | 0.345536000  | 0.839420000  |
| 6  | 0.281622000  | 1.943708000  | 1.322599000  |
| 6  | 2.515972000  | 1.652346000  | 0.985098000  |
| 6  | 2.767338000  | -0.734915000 | 0.480372000  |
| 6  | 3.853197000  | 1.879579000  | 0.822195000  |
| 6  | 4.106740000  | -0.516329000 | 0.308480000  |
| 1  | 2.356326000  | -1.727779000 | 0.372758000  |
| 6  | 4.709247000  | 0.781087000  | 0.476554000  |
| 1  | 4.258159000  | 2.876216000  | 0.943425000  |
| 1  | 4.740671000  | -1.354312000 | 0.039648000  |
| 8  | -0.761259000 | 2.526293000  | 1.580760000  |
| 8  | 0.761256000  | -2.526254000 | 1.580821000  |
| 7  | 1.526441000  | 2.569877000  | 1.287689000  |
| 7  | -1.526441000 | -2.569847000 | 1.287735000  |
| 6  | -1.712490000 | -3.984297000 | 1.536994000  |
| 1  | -2.370460000 | -4.146142000 | 2.397285000  |
| 1  | -2.139065000 | -4.484009000 | 0.660551000  |
| 1  | -0.730217000 | -4.406502000 | 1.750483000  |
| 6  | 1.712484000  | 3.984340000  | 1.536873000  |
| 1  | 2.370472000  | 4.146232000  | 2.397141000  |
| 1  | 2.139036000  | 4.484014000  | 0.660396000  |
| 1  | 0.730212000  | 4.406548000  | 1.750364000  |
| 6  | -6.092606000 | -0.968426000 | 0.299698000  |
| 6  | -6.825451000 | -2.180381000 | 0.435945000  |
| 16 | -7.184740000 | 0.354924000  | -0.146062000 |
| 6  | -8.167577000 | -2.058080000 | 0.199574000  |
| 1  | -6.363715000 | -3.122210000 | 0.705753000  |
| 6  | -8.580644000 | -0.725792000 | -0.142346000 |
| 1  | -8.890247000 | -2.857837000 | 0.252461000  |
| 6  | 6.092607000  | 0.968432000  | 0.299694000  |
| 6  | 6.825449000  | 2.180393000  | 0.435897000  |
| 16 | 7.184742000  | -0.354930000 | -0.146028000 |
| 6  | 8.167574000  | 2.058087000  | 0.199523000  |
| 1  | 6.363712000  | 3.122230000  | 0.705676000  |
| 6  | 8.580643000  | 0.725789000  | -0.142354000 |
| 1  | 8.890243000  | 2.857848000  | 0.252381000  |
| 6  | 9.875494000  | 0.288802000  | -0.437648000 |
| 6  | 11.009566000 | 1.212922000  | -0.425838000 |

|    |               |              |              |
|----|---------------|--------------|--------------|
| 6  | 10.083928000  | -1.114505000 | -0.761305000 |
| 6  | 12.495740000  | -0.681510000 | -1.051776000 |
| 6  | -9.875495000  | -0.288812000 | -0.437650000 |
| 6  | -11.009570000 | -1.212928000 | -0.425804000 |
| 6  | -10.083927000 | 1.114486000  | -0.761352000 |
| 6  | -12.495741000 | 0.681487000  | -1.051799000 |
| 8  | 9.159070000   | -1.929048000 | -0.785173000 |
| 8  | -9.159066000  | 1.929025000  | -0.785254000 |
| 7  | 11.396552000  | -1.523599000 | -1.051626000 |
| 7  | -11.396551000 | 1.523573000  | -1.051682000 |
| 6  | -11.591630000 | 2.946018000  | -1.375099000 |
| 1  | -12.286423000 | 3.394334000  | -0.663701000 |
| 1  | -10.617747000 | 3.423822000  | -1.318116000 |
| 1  | -12.013494000 | 3.042677000  | -2.376386000 |
| 6  | 11.591634000  | -2.946054000 | -1.374996000 |
| 1  | 12.286430000  | -3.394344000 | -0.663586000 |
| 1  | 10.617752000  | -3.423858000 | -1.317994000 |
| 1  | 12.013494000  | -3.042746000 | -2.376282000 |
| 7  | 12.269439000  | 0.648431000  | -0.741918000 |
| 7  | -12.269442000 | -0.648444000 | -0.741897000 |
| 6  | 13.418798000  | 1.568421000  | -0.734277000 |
| 1  | 14.157681000  | 1.229925000  | -0.006663000 |
| 1  | 13.887267000  | 1.581824000  | -1.719309000 |
| 1  | 13.040313000  | 2.551909000  | -0.472377000 |
| 6  | -13.418803000 | -1.568431000 | -0.734221000 |
| 1  | -14.157683000 | -1.229908000 | -0.006616000 |
| 1  | -13.887276000 | -1.581866000 | -1.719251000 |
| 1  | -13.040320000 | -2.551911000 | -0.472289000 |
| 8  | -10.931407000 | -2.410642000 | -0.165990000 |
| 8  | 10.931402000  | 2.410645000  | -0.166064000 |
| 16 | 14.028212000  | -1.251273000 | -1.411565000 |
| 16 | -14.028213000 | 1.251243000  | -1.411601000 |

**S7IIDT-CS**

E=-3345.507171 Hartree

|   |              |              |              |
|---|--------------|--------------|--------------|
| 6 | -2.488087000 | 1.694236000  | -1.236766000 |
| 6 | -1.907373000 | 0.376886000  | -1.094856000 |
| 6 | -2.789537000 | -0.687550000 | -0.751614000 |
| 6 | -4.126904000 | -0.443152000 | -0.584340000 |
| 6 | -4.699262000 | 0.864976000  | -0.744765000 |
| 6 | -3.822894000 | 1.947364000  | -1.080648000 |
| 6 | -0.246778000 | 1.950674000  | -1.553919000 |
| 6 | -0.512695000 | 0.490695000  | -1.276481000 |
| 1 | -2.401334000 | -1.690548000 | -0.655837000 |

|    |              |              |              |
|----|--------------|--------------|--------------|
| 1  | -4.780243000 | -1.274094000 | -0.339996000 |
| 1  | -4.205949000 | 2.953922000  | -1.190790000 |
| 6  | 0.512678000  | -0.489841000 | -1.276513000 |
| 6  | 1.907372000  | -0.376176000 | -1.094853000 |
| 6  | 0.246609000  | -1.949783000 | -1.553962000 |
| 6  | 2.487952000  | -1.693578000 | -1.236882000 |
| 6  | 2.789656000  | 0.688119000  | -0.751470000 |
| 6  | 3.822733000  | -1.946864000 | -1.080799000 |
| 6  | 4.126997000  | 0.443560000  | -0.584230000 |
| 1  | 2.401568000  | 1.691146000  | -0.655564000 |
| 6  | 4.699219000  | -0.864608000 | -0.744812000 |
| 1  | 4.205676000  | -2.953455000 | -1.191030000 |
| 1  | 4.780425000  | 1.274403000  | -0.339787000 |
| 8  | -0.806739000 | -2.518286000 | -1.799795000 |
| 8  | 0.806476000  | 2.519290000  | -1.799888000 |
| 7  | 1.480664000  | -2.596078000 | -1.524949000 |
| 7  | -1.480895000 | 2.596849000  | -1.524813000 |
| 6  | -1.641226000 | 4.015687000  | -1.767704000 |
| 1  | -2.290774000 | 4.192790000  | -2.631331000 |
| 1  | -2.064789000 | 4.518039000  | -0.891286000 |
| 1  | -0.650639000 | 4.422252000  | -1.972793000 |
| 6  | 1.640846000  | -4.014923000 | -1.767897000 |
| 1  | 2.290345000  | -4.192059000 | -2.631554000 |
| 1  | 2.064389000  | -4.517348000 | -0.891511000 |
| 1  | 0.650211000  | -4.421381000 | -1.972967000 |
| 6  | -6.080277000 | 1.086805000  | -0.564767000 |
| 6  | -6.804516000 | 2.295207000  | -0.755521000 |
| 16 | -7.185090000 | -0.187377000 | -0.052866000 |
| 6  | -8.146811000 | 2.202390000  | -0.500139000 |
| 1  | -6.332135000 | 3.210214000  | -1.090119000 |
| 6  | -8.576273000 | 0.895450000  | -0.092115000 |
| 1  | -8.857830000 | 3.012010000  | -0.580681000 |
| 6  | 6.080212000  | -1.086604000 | -0.564844000 |
| 6  | 6.804319000  | -2.295064000 | -0.755731000 |
| 16 | 7.185163000  | 0.187404000  | -0.052808000 |
| 6  | 8.146626000  | -2.202418000 | -0.500345000 |
| 1  | 6.331838000  | -3.209984000 | -1.090426000 |
| 6  | 8.576230000  | -0.895568000 | -0.092182000 |
| 1  | 8.857558000  | -3.012106000 | -0.580978000 |
| 6  | 9.863525000  | -0.578911000 | 0.341749000  |
| 6  | 10.827479000 | -1.662855000 | 0.732806000  |
| 6  | 10.453835000 | 0.686809000  | 0.741312000  |
| 6  | 11.856435000 | -1.004466000 | 1.572046000  |
| 6  | 11.611218000 | 0.379484000  | 1.626853000  |

|   |               |              |              |
|---|---------------|--------------|--------------|
| 6 | 12.912802000  | -1.602007000 | 2.245115000  |
| 6 | 12.445205000  | 1.190475000  | 2.401382000  |
| 6 | 13.743306000  | -0.787260000 | 3.018042000  |
| 1 | 13.069469000  | -2.672710000 | 2.163116000  |
| 6 | 13.501778000  | 0.589034000  | 3.095078000  |
| 1 | 12.291259000  | 2.257660000  | 2.484753000  |
| 1 | 14.576291000  | -1.219474000 | 3.563762000  |
| 1 | 14.148476000  | 1.211320000  | 3.706063000  |
| 6 | -9.863531000  | 0.578606000  | 0.341787000  |
| 6 | -10.827603000 | 1.662402000  | 0.732963000  |
| 6 | -10.453699000 | -0.687222000 | 0.741216000  |
| 6 | -11.856496000 | 1.003807000  | 1.572120000  |
| 6 | -11.611123000 | -0.380121000 | 1.626781000  |
| 6 | -12.912937000 | 1.601157000  | 2.245241000  |
| 6 | -12.445026000 | -1.191289000 | 2.401216000  |
| 6 | -13.743357000 | 0.786234000  | 3.018073000  |
| 1 | -13.069724000 | 2.671851000  | 2.163355000  |
| 6 | -13.501674000 | -0.590041000 | 3.094966000  |
| 1 | -12.290961000 | -2.258465000 | 2.484475000  |
| 1 | -14.576396000 | 1.218296000  | 3.563830000  |
| 1 | -14.148308000 | -1.212465000 | 3.705878000  |
| 8 | -10.780420000 | 2.855639000  | 0.468463000  |
| 8 | 10.780154000  | -2.856061000 | 0.468192000  |
| 6 | -10.141123000 | -1.955887000 | 0.273002000  |
| 6 | 10.141406000  | 1.955559000  | 0.273229000  |
| 6 | -9.327272000  | -2.202977000 | -0.872500000 |
| 7 | -8.718124000  | -2.454278000 | -1.833684000 |
| 6 | -10.732449000 | -3.143261000 | 0.804076000  |
| 7 | -11.179479000 | -4.132836000 | 1.226991000  |
| 6 | 10.732866000  | 3.142809000  | 0.804432000  |
| 7 | 11.180009000  | 4.132286000  | 1.227457000  |
| 6 | 9.327598000   | 2.202864000  | -0.872256000 |
| 7 | 8.718506000   | 2.454335000  | -1.833431000 |

**S8IIDT-CS**

E=-4215.945304 Hartree

|   |             |              |              |
|---|-------------|--------------|--------------|
| 6 | 2.523131000 | -1.640296000 | -1.304964000 |
| 6 | 1.914614000 | -0.335561000 | -1.160526000 |
| 6 | 2.773633000 | 0.747432000  | -0.816289000 |
| 6 | 4.115968000 | 0.531682000  | -0.651293000 |
| 6 | 4.716043000 | -0.763641000 | -0.815353000 |
| 6 | 3.863404000 | -1.864600000 | -1.151576000 |
| 6 | 0.287942000 | -1.944710000 | -1.619344000 |
| 6 | 0.522878000 | -0.478896000 | -1.341112000 |

|    |               |              |              |
|----|---------------|--------------|--------------|
| 1  | 2.363778000   | 1.741473000  | -0.717713000 |
| 1  | 4.750942000   | 1.376264000  | -0.405197000 |
| 1  | 4.267957000   | -2.862384000 | -1.264078000 |
| 6  | -0.522987000  | 0.479427000  | -1.340903000 |
| 6  | -1.914707000  | 0.336023000  | -1.160249000 |
| 6  | -0.288083000  | 1.945336000  | -1.618658000 |
| 6  | -2.523240000  | 1.640809000  | -1.304165000 |
| 6  | -2.773691000  | -0.747095000 | -0.816321000 |
| 6  | -3.863499000  | 1.865054000  | -1.150571000 |
| 6  | -4.116012000  | -0.531408000 | -0.651124000 |
| 1  | -2.363824000  | -1.741170000 | -0.718137000 |
| 6  | -4.716105000  | 0.763973000  | -0.814665000 |
| 1  | -4.268066000  | 2.862878000  | -1.262677000 |
| 1  | -4.750961000  | -1.376080000 | -0.405272000 |
| 8  | 0.753428000   | 2.535350000  | -1.862705000 |
| 8  | -0.753590000  | -2.534630000 | -1.863528000 |
| 7  | -1.535673000  | 2.564618000  | -1.591744000 |
| 7  | 1.535535000   | -2.564002000 | -1.592782000 |
| 6  | 1.726390000   | -3.979239000 | -1.837211000 |
| 1  | 2.376741000   | -4.141126000 | -2.703102000 |
| 1  | 2.163605000   | -4.472180000 | -0.962292000 |
| 1  | 0.744461000   | -4.407528000 | -2.039450000 |
| 6  | -1.726552000  | 3.979944000  | -1.835638000 |
| 1  | -2.376992000  | 4.142146000  | -2.701405000 |
| 1  | -2.163678000  | 4.472568000  | -0.960496000 |
| 1  | -0.744643000  | 4.408307000  | -2.037821000 |
| 6  | 6.101535000   | -0.955110000 | -0.638526000 |
| 6  | 6.851379000   | -2.147121000 | -0.831357000 |
| 16 | 7.178513000   | 0.345402000  | -0.131209000 |
| 6  | 8.191142000   | -2.024564000 | -0.580993000 |
| 1  | 6.399417000   | -3.073485000 | -1.161847000 |
| 6  | 8.592732000   | -0.707942000 | -0.172631000 |
| 1  | 8.897742000   | -2.837519000 | -0.676613000 |
| 6  | -6.101580000  | 0.955375000  | -0.637643000 |
| 6  | -6.851446000  | 2.147451000  | -0.829985000 |
| 16 | -7.178509000  | -0.345319000 | -0.130691000 |
| 6  | -8.191186000  | 2.024803000  | -0.579544000 |
| 1  | -6.399517000  | 3.073933000  | -1.160191000 |
| 6  | -8.592733000  | 0.708036000  | -0.171602000 |
| 1  | -8.897796000  | 2.837789000  | -0.674817000 |
| 6  | -9.864161000  | 0.351990000  | 0.254537000  |
| 6  | -10.441438000 | -0.899148000 | 0.667543000  |
| 6  | -11.976412000 | 0.646974000  | 1.712538000  |
| 6  | -11.542322000 | -0.686069000 | 1.648908000  |

|    |               |              |              |
|----|---------------|--------------|--------------|
| 6  | -13.006266000 | 1.084097000  | 2.529940000  |
| 6  | -12.179168000 | -1.615230000 | 2.484959000  |
| 6  | -13.630863000 | 0.141552000  | 3.349104000  |
| 1  | -13.303867000 | 2.127245000  | 2.536542000  |
| 6  | -13.210914000 | -1.190937000 | 3.324312000  |
| 1  | -11.877721000 | -2.652831000 | 2.502392000  |
| 1  | -14.436397000 | 0.447009000  | 4.008952000  |
| 1  | -13.691104000 | -1.917432000 | 3.972015000  |
| 6  | 9.864201000   | -0.352065000 | 0.253529000  |
| 6  | 10.441546000  | 0.898912000  | 0.666922000  |
| 6  | 11.976527000  | -0.647643000 | 1.711280000  |
| 6  | 11.542474000  | 0.685440000  | 1.648170000  |
| 6  | 13.006404000  | -1.085115000 | 2.528466000  |
| 6  | 12.179377000  | 1.614248000  | 2.484574000  |
| 6  | 13.631065000  | -0.142909000 | 3.347969000  |
| 1  | 13.303970000  | -2.128275000 | 2.534654000  |
| 6  | 13.211147000  | 1.189597000  | 3.323718000  |
| 1  | 11.877959000  | 2.651846000  | 2.502448000  |
| 1  | 14.436616000  | -0.448648000 | 4.007667000  |
| 1  | 13.691378000  | 1.915824000  | 3.971691000  |
| 6  | 10.100543000  | 2.140643000  | 0.132367000  |
| 6  | -10.100444000 | -2.140705000 | 0.132598000  |
| 6  | 9.348486000   | 2.284712000  | -1.069889000 |
| 7  | 8.775566000   | 2.446814000  | -2.071893000 |
| 6  | 10.578328000  | 3.385040000  | 0.641218000  |
| 7  | 10.929103000  | 4.425097000  | 1.033652000  |
| 6  | -10.578251000 | -3.385232000 | 0.641110000  |
| 7  | -10.929158000 | -4.425317000 | 1.033354000  |
| 6  | -9.348466000  | -2.284421000 | -1.069750000 |
| 7  | -8.775573000  | -2.446218000 | -2.071819000 |
| 16 | 11.047794000  | -1.690282000 | 0.606388000  |
| 16 | -11.047761000 | 1.690051000  | 0.607987000  |
| 8  | 11.827184000  | -2.021502000 | -0.596368000 |
| 8  | 10.407917000  | -2.784402000 | 1.353385000  |
| 8  | -10.407871000 | 2.783899000  | 1.355371000  |
| 8  | -11.827236000 | 2.021717000  | -0.594590000 |

**S9IIDT-CS**

E=-4187.828756 Hartree

|   |             |              |             |
|---|-------------|--------------|-------------|
| 6 | 2.521663000 | 1.653674000  | 0.942572000 |
| 6 | 1.912426000 | 0.348850000  | 0.809184000 |
| 6 | 2.776501000 | -0.729556000 | 0.464823000 |
| 6 | 4.118048000 | -0.508970000 | 0.289352000 |

|    |              |              |              |
|----|--------------|--------------|--------------|
| 6  | 4.719315000  | 0.786174000  | 0.438902000  |
| 6  | 3.858246000  | 1.884485000  | 0.774227000  |
| 6  | 0.281595000  | 1.938145000  | 1.282342000  |
| 6  | 0.521885000  | 0.486351000  | 1.002698000  |
| 1  | 2.368356000  | -1.725633000 | 0.373560000  |
| 1  | 4.752187000  | -1.352316000 | 0.032609000  |
| 1  | 4.257609000  | 2.885504000  | 0.884764000  |
| 6  | -0.521879000 | -0.486427000 | 1.002650000  |
| 6  | -1.912413000 | -0.348917000 | 0.809095000  |
| 6  | -0.281591000 | -1.938242000 | 1.282188000  |
| 6  | -2.521669000 | -1.653729000 | 0.942515000  |
| 6  | -2.776475000 | 0.729497000  | 0.464723000  |
| 6  | -3.858258000 | -1.884522000 | 0.774193000  |
| 6  | -4.118026000 | 0.508926000  | 0.289261000  |
| 1  | -2.368320000 | 1.725568000  | 0.373454000  |
| 6  | -4.719312000 | -0.786206000 | 0.438844000  |
| 1  | -4.257636000 | -2.885532000 | 0.884760000  |
| 1  | -4.752156000 | 1.352277000  | 0.032513000  |
| 8  | 0.758389000  | -2.535954000 | 1.539625000  |
| 8  | -0.758418000 | 2.535877000  | 1.539600000  |
| 7  | -1.528159000 | -2.570389000 | 1.238350000  |
| 7  | 1.528140000  | 2.570328000  | 1.238382000  |
| 6  | 1.706134000  | 3.984246000  | 1.473842000  |
| 1  | 2.366641000  | 4.162076000  | 2.330303000  |
| 1  | 2.127340000  | 4.483257000  | 0.593106000  |
| 1  | 0.720505000  | 4.400032000  | 1.686887000  |
| 6  | -1.706184000 | -3.984285000 | 1.473920000  |
| 1  | -2.366650000 | -4.162038000 | 2.330429000  |
| 1  | -2.127453000 | -4.483341000 | 0.593240000  |
| 1  | -0.720556000 | -4.400086000 | 1.686938000  |
| 6  | 6.100823000  | 0.981090000  | 0.260960000  |
| 6  | 6.845368000  | 2.189017000  | 0.378733000  |
| 16 | 7.205206000  | -0.342154000 | -0.168288000 |
| 6  | 8.189529000  | 2.070104000  | 0.144764000  |
| 1  | 6.375660000  | 3.129793000  | 0.636864000  |
| 6  | 8.614308000  | 0.743548000  | -0.178989000 |
| 1  | 8.884577000  | 2.900641000  | 0.197570000  |
| 6  | -6.100825000 | -0.981104000 | 0.260919000  |
| 6  | -6.845388000 | -2.189016000 | 0.378727000  |
| 16 | -7.205190000 | 0.342147000  | -0.168348000 |
| 6  | -8.189549000 | -2.070087000 | 0.144770000  |
| 1  | -6.375692000 | -3.129794000 | 0.636874000  |
| 6  | -8.614310000 | -0.743532000 | -0.179008000 |
| 1  | -8.884610000 | -2.900613000 | 0.197603000  |



|    |               |              |              |
|----|---------------|--------------|--------------|
| 6  | -9.885246000  | -0.312563000 | -0.461239000 |
| 16 | -10.265587000 | 1.369094000  | -0.846432000 |
| 16 | -11.279571000 | -1.406403000 | -0.467651000 |
| 6  | -12.003756000 | 1.128048000  | -1.066745000 |
| 6  | -12.481120000 | -0.179208000 | -0.888269000 |
| 6  | -12.883733000 | 2.160049000  | -1.400691000 |
| 6  | -13.840778000 | -0.459448000 | -1.043175000 |
| 6  | -14.240089000 | 1.875856000  | -1.554378000 |
| 1  | -12.513424000 | 3.170944000  | -1.538260000 |
| 6  | -14.715632000 | 0.573799000  | -1.376644000 |
| 1  | -14.209969000 | -1.470678000 | -0.904950000 |
| 1  | -14.926838000 | 2.675070000  | -1.813710000 |
| 1  | -15.772602000 | 0.359654000  | -1.497695000 |
| 6  | 9.885248000   | 0.312593000  | -0.461226000 |
| 16 | 10.265610000  | -1.369066000 | -0.846387000 |
| 16 | 11.279555000  | 1.406455000  | -0.467679000 |
| 6  | 12.003773000  | -1.127997000 | -1.066727000 |
| 6  | 12.481118000  | 0.179270000  | -0.888285000 |
| 6  | 12.883763000  | -2.159991000 | -1.400662000 |
| 6  | 13.840770000  | 0.459529000  | -1.043214000 |
| 6  | 14.240112000  | -1.875779000 | -1.554372000 |
| 1  | 12.513468000  | -3.170895000 | -1.538205000 |
| 6  | 14.715636000  | -0.573711000 | -1.376672000 |
| 1  | 14.209946000  | 1.470768000  | -0.905015000 |
| 1  | 14.926870000  | -2.674989000 | -1.813695000 |
| 1  | 15.772602000  | -0.359551000 | -1.497741000 |

**S10IIDT-CS** E=-3880.511261 Hartree

|   |              |              |              |
|---|--------------|--------------|--------------|
| 6 | -2.590865000 | -1.543077000 | 0.728798000  |
| 6 | -1.926265000 | -0.265756000 | 0.596202000  |
| 6 | -2.743511000 | 0.848646000  | 0.253210000  |
| 6 | -4.093627000 | 0.685800000  | 0.078176000  |
| 6 | -4.749624000 | -0.582153000 | 0.226888000  |
| 6 | -3.936362000 | -1.716351000 | 0.560838000  |
| 6 | -0.364857000 | -1.924077000 | 1.067269000  |
| 6 | -0.542334000 | -0.463204000 | 0.789076000  |
| 1 | -2.293244000 | 1.826469000  | 0.162626000  |
| 1 | -4.691057000 | 1.555889000  | -0.177534000 |
| 1 | -4.378179000 | -2.699474000 | 0.670825000  |
| 6 | 0.542340000  | 0.463388000  | 0.789018000  |
| 6 | 1.926270000  | 0.265894000  | 0.596196000  |
| 6 | 0.364879000  | 1.924301000  | 1.067015000  |
| 6 | 2.590878000  | 1.543236000  | 0.728551000  |

|    |               |              |              |
|----|---------------|--------------|--------------|
| 6  | 2.743505000   | -0.848577000 | 0.253404000  |
| 6  | 3.936374000   | 1.716471000  | 0.560544000  |
| 6  | 4.093621000   | -0.685772000 | 0.078331000  |
| 1  | 2.293228000   | -1.826412000 | 0.162998000  |
| 6  | 4.749627000   | 0.582204000  | 0.226801000  |
| 1  | 4.378198000   | 2.699612000  | 0.670345000  |
| 1  | 4.691042000   | -1.555912000 | -0.177225000 |
| 8  | -0.648293000  | 2.566947000  | 1.323656000  |
| 8  | 0.648316000   | -2.566659000 | 1.324068000  |
| 7  | 1.637577000   | 2.502157000  | 1.022946000  |
| 7  | -1.637558000  | -2.501939000 | 1.023363000  |
| 6  | -1.876130000  | -3.906971000 | 1.257916000  |
| 1  | -2.543380000  | -4.056927000 | 2.114518000  |
| 1  | -2.318792000  | -4.386875000 | 0.377052000  |
| 1  | -0.909168000  | -4.364845000 | 1.470259000  |
| 6  | 1.876158000   | 3.907232000  | 1.257232000  |
| 1  | 2.543433000   | 4.057344000  | 2.113787000  |
| 1  | 2.318794000   | 4.386975000  | 0.376268000  |
| 1  | 0.909203000   | 4.365146000  | 1.469520000  |
| 6  | -6.138911000  | -0.717794000 | 0.049663000  |
| 6  | -6.934806000  | -1.891727000 | 0.166076000  |
| 16 | -7.185719000  | 0.652609000  | -0.376983000 |
| 6  | -8.273492000  | -1.713826000 | -0.067005000 |
| 1  | -6.506273000  | -2.852455000 | 0.422368000  |
| 6  | -8.639919000  | -0.370763000 | -0.388165000 |
| 1  | -9.004000000  | -2.513551000 | -0.015094000 |
| 6  | 6.138913000   | 0.717804000  | 0.049540000  |
| 6  | 6.934816000   | 1.891753000  | 0.165732000  |
| 16 | 7.185708000   | -0.652685000 | -0.376862000 |
| 6  | 8.273499000   | 1.713800000  | -0.067329000 |
| 1  | 6.506292000   | 2.852531000  | 0.421850000  |
| 6  | 8.639915000   | 0.370676000  | -0.388244000 |
| 1  | 9.004013000   | 2.513530000  | -0.015570000 |
| 6  | 9.891486000   | -0.117863000 | -0.669155000 |
| 16 | 10.208744000  | -1.817134000 | -1.052774000 |
| 16 | 11.344642000  | 0.901896000  | -0.680108000 |
| 6  | 11.941559000  | -1.620483000 | -1.266200000 |
| 6  | 12.453068000  | -0.394824000 | -1.098115000 |
| 6  | -9.891496000  | 0.117716000  | -0.669153000 |
| 16 | -10.208769000 | 1.816914000  | -1.053083000 |
| 16 | -11.344645000 | -0.902055000 | -0.679906000 |
| 6  | -11.941584000 | 1.620213000  | -1.266458000 |
| 6  | -12.453084000 | 0.394581000  | -1.098142000 |
| 1  | -13.500349000 | 0.138437000  | -1.199920000 |

|   |               |              |              |
|---|---------------|--------------|--------------|
| 1 | -12.513814000 | 2.502549000  | -1.524548000 |
| 1 | 12.513781000  | -2.502870000 | -1.524134000 |
| 1 | 13.500334000  | -0.138705000 | -1.199949000 |

**S1IIDT-OS**

E=-2504.321281 Hartree

|    |              |              |              |
|----|--------------|--------------|--------------|
| 6  | 2.645987000  | 1.429652000  | 0.403890000  |
| 6  | 1.972893000  | 0.172895000  | 0.299739000  |
| 6  | 2.767963000  | -0.961519000 | 0.046793000  |
| 6  | 4.143105000  | -0.835288000 | -0.065826000 |
| 6  | 4.802023000  | 0.412679000  | 0.064877000  |
| 6  | 4.012424000  | 1.569199000  | 0.300524000  |
| 6  | 0.427975000  | 1.929358000  | 0.596945000  |
| 6  | 0.548753000  | 0.426711000  | 0.412417000  |
| 1  | 2.305875000  | -1.932558000 | -0.037144000 |
| 1  | 4.726518000  | -1.731256000 | -0.251592000 |
| 1  | 4.468017000  | 2.547648000  | 0.386681000  |
| 6  | -0.548753000 | -0.426705000 | 0.412431000  |
| 6  | -1.972893000 | -0.172890000 | 0.299757000  |
| 6  | -0.427977000 | -1.929345000 | 0.597018000  |
| 6  | -2.645988000 | -1.429645000 | 0.403937000  |
| 6  | -2.767962000 | 0.961519000  | 0.046788000  |
| 6  | -4.012425000 | -1.569193000 | 0.300571000  |
| 6  | -4.143105000 | 0.835287000  | -0.065829000 |
| 1  | -2.305873000 | 1.932555000  | -0.037172000 |
| 6  | -4.802023000 | -0.412677000 | 0.064899000  |
| 1  | -4.468019000 | -2.547640000 | 0.386750000  |
| 1  | -4.726517000 | 1.731250000  | -0.251616000 |
| 8  | 0.566302000  | -2.619963000 | 0.764934000  |
| 8  | -0.566302000 | 2.619975000  | 0.764877000  |
| 7  | -1.716396000 | -2.441378000 | 0.598208000  |
| 7  | 1.716394000  | 2.441390000  | 0.598135000  |
| 6  | 2.010232000  | 3.849032000  | 0.773031000  |
| 1  | 2.639455000  | 4.008395000  | 1.654991000  |
| 1  | 2.518770000  | 4.254758000  | -0.108217000 |
| 1  | 1.059539000  | 4.364191000  | 0.910360000  |
| 6  | -2.010233000 | -3.849021000 | 0.773101000  |
| 1  | -2.639467000 | -4.008385000 | 1.655052000  |
| 1  | -2.518758000 | -4.254749000 | -0.108154000 |
| 1  | -1.059541000 | -4.364178000 | 0.910444000  |
| 6  | 6.234226000  | 0.518738000  | -0.042300000 |
| 6  | 7.033851000  | 1.665147000  | 0.100487000  |
| 16 | 7.244784000  | -0.882264000 | -0.392927000 |
| 6  | 8.392439000  | 1.441279000  | -0.061095000 |

|    |               |              |              |
|----|---------------|--------------|--------------|
| 1  | 6.623335000   | 2.641829000  | 0.323774000  |
| 6  | 8.706754000   | 0.090946000  | -0.340581000 |
| 1  | 9.157713000   | 2.204155000  | 0.015340000  |
| 6  | -6.234226000  | -0.518739000 | -0.042280000 |
| 6  | -7.033852000  | -1.665145000 | 0.100527000  |
| 16 | -7.244783000  | 0.882257000  | -0.392933000 |
| 6  | -8.392439000  | -1.441279000 | -0.061061000 |
| 1  | -6.623336000  | -2.641823000 | 0.323830000  |
| 6  | -8.706754000  | -0.090951000 | -0.340569000 |
| 1  | -9.157714000  | -2.204154000 | 0.015386000  |
| 6  | -9.983339000  | 0.453015000  | -0.555404000 |
| 6  | 9.983340000   | -0.453023000 | -0.555406000 |
| 6  | -11.129480000 | -0.385280000 | -0.502340000 |
| 7  | -12.053355000 | -1.095509000 | -0.453199000 |
| 6  | -10.170151000 | 1.833093000  | -0.828374000 |
| 7  | -10.297617000 | 2.971196000  | -1.051374000 |
| 6  | 10.170153000  | -1.833106000 | -0.828349000 |
| 7  | 10.297622000  | -2.971219000 | -1.051296000 |
| 6  | 11.129481000  | 0.385273000  | -0.502351000 |
| 7  | 12.053355000  | 1.095503000  | -0.453220000 |

**S2IIDT-OS**

E=-2669.295469 Hartree

|   |              |              |              |
|---|--------------|--------------|--------------|
| 6 | -2.593592000 | 1.522331000  | -0.624118000 |
| 6 | -1.975817000 | 0.242736000  | -0.527839000 |
| 6 | -2.818497000 | -0.856741000 | -0.298109000 |
| 6 | -4.193559000 | -0.674523000 | -0.199258000 |
| 6 | -4.792598000 | 0.596491000  | -0.319652000 |
| 6 | -3.957129000 | 1.718666000  | -0.529731000 |
| 6 | -0.354629000 | 1.944681000  | -0.781340000 |
| 6 | -0.530832000 | 0.443342000  | -0.622368000 |
| 1 | -2.398959000 | -1.847423000 | -0.223344000 |
| 1 | -4.820376000 | -1.548099000 | -0.051972000 |
| 1 | -4.373284000 | 2.717504000  | -0.582517000 |
| 6 | 0.530835000  | -0.443302000 | -0.622394000 |
| 6 | 1.975820000  | -0.242708000 | -0.527841000 |
| 6 | 0.354624000  | -1.944636000 | -0.781413000 |
| 6 | 2.593585000  | -1.522310000 | -0.624112000 |
| 6 | 2.818512000  | 0.856767000  | -0.298142000 |
| 6 | 3.957118000  | -1.718657000 | -0.529712000 |
| 6 | 4.193572000  | 0.674536000  | -0.199289000 |
| 1 | 2.398977000  | 1.847452000  | -0.223395000 |
| 6 | 4.792598000  | -0.596487000 | -0.319650000 |
| 1 | 4.373264000  | -2.717500000 | -0.582480000 |

|    |               |              |              |
|----|---------------|--------------|--------------|
| 1  | 4.820399000   | 1.548109000  | -0.052026000 |
| 8  | -0.664477000  | -2.605365000 | -0.925311000 |
| 8  | 0.664470000   | 2.605434000  | -0.925152000 |
| 7  | 1.622461000   | -2.502385000 | -0.790132000 |
| 7  | -1.622474000  | 2.502415000  | -0.790119000 |
| 6  | -1.862582000  | 3.921624000  | -0.943710000 |
| 1  | -2.477796000  | 4.118928000  | -1.828141000 |
| 1  | -2.365484000  | 4.331752000  | -0.061000000 |
| 1  | -0.892270000  | 4.403630000  | -1.063545000 |
| 6  | 1.862562000   | -3.921588000 | -0.943789000 |
| 1  | 2.477819000   | -4.118849000 | -1.828200000 |
| 1  | 2.365415000   | -4.331771000 | -0.061077000 |
| 1  | 0.892251000   | -4.403577000 | -1.063699000 |
| 6  | -6.233311000  | 0.771449000  | -0.230148000 |
| 6  | -6.995068000  | 1.865777000  | -0.623026000 |
| 16 | -7.274391000  | -0.470210000 | 0.438323000  |
| 6  | -8.371360000  | 1.713978000  | -0.404564000 |
| 1  | -6.564172000  | 2.744580000  | -1.087244000 |
| 6  | -8.726505000  | 0.491048000  | 0.169704000  |
| 1  | -9.096596000  | 2.471479000  | -0.673851000 |
| 6  | 6.233308000   | -0.771459000 | -0.230133000 |
| 6  | 6.995056000   | -1.865801000 | -0.622988000 |
| 16 | 7.274396000   | 0.470195000  | 0.438337000  |
| 6  | 8.371349000   | -1.714009000 | -0.404526000 |
| 1  | 6.564155000   | -2.744606000 | -1.087198000 |
| 6  | 8.726503000   | -0.491073000 | 0.169723000  |
| 1  | 9.096581000   | -2.471517000 | -0.673806000 |
| 6  | -10.031304000 | 0.012900000  | 0.522300000  |
| 6  | -10.231020000 | -1.301553000 | 1.050871000  |
| 6  | -11.184348000 | 0.847032000  | 0.355011000  |
| 6  | -11.473775000 | -1.757780000 | 1.388021000  |
| 1  | -9.371540000  | -1.953532000 | 1.181338000  |
| 6  | -12.435249000 | 0.410761000  | 0.685479000  |
| 1  | -11.058358000 | 1.850557000  | -0.037841000 |
| 6  | -12.662205000 | -0.926082000 | 1.225882000  |
| 1  | -11.623369000 | -2.756102000 | 1.786413000  |
| 1  | -13.307956000 | 1.043782000  | 0.560548000  |
| 6  | 10.031307000  | -0.012928000 | 0.522307000  |
| 6  | 11.184339000  | -0.847084000 | 0.355067000  |
| 6  | 10.231038000  | 1.301550000  | 1.050812000  |
| 6  | 12.435244000  | -0.410816000 | 0.685524000  |
| 1  | 11.058337000  | -1.850626000 | -0.037737000 |
| 6  | 11.473798000  | 1.757775000  | 1.387949000  |
| 1  | 9.371567000   | 1.953551000  | 1.181231000  |

|   |               |              |             |
|---|---------------|--------------|-------------|
| 6 | 12.662213000  | 0.926044000  | 1.225879000 |
| 1 | 13.307943000  | -1.043855000 | 0.560628000 |
| 1 | 11.623404000  | 2.756118000  | 1.786285000 |
| 8 | -13.800770000 | -1.332676000 | 1.530115000 |
| 8 | 13.800786000  | 1.332647000  | 1.530070000 |

**S3IIDT-OS**

E=-3640.036105 Hartree

|   |              |              |              |
|---|--------------|--------------|--------------|
| 6 | -2.589690000 | -1.528671000 | 0.230878000  |
| 6 | -1.977059000 | -0.246146000 | 0.142595000  |
| 6 | -2.823890000 | 0.854203000  | -0.062812000 |
| 6 | -4.199829000 | 0.669552000  | -0.150700000 |
| 6 | -4.792474000 | -0.604052000 | -0.037653000 |
| 6 | -3.954827000 | -1.726433000 | 0.155630000  |
| 6 | -0.350703000 | -1.947396000 | 0.381745000  |
| 6 | -0.529415000 | -0.443967000 | 0.230453000  |
| 1 | -2.406861000 | 1.845413000  | -0.141771000 |
| 1 | -4.826131000 | 1.537349000  | -0.331016000 |
| 1 | -4.373355000 | -2.719469000 | 0.266301000  |
| 6 | 0.529421000  | 0.443998000  | 0.230469000  |
| 6 | 1.977062000  | 0.246176000  | 0.142582000  |
| 6 | 0.350709000  | 1.947441000  | 0.381658000  |
| 6 | 2.589703000  | 1.528692000  | 0.230928000  |
| 6 | 2.823882000  | -0.854163000 | -0.062919000 |
| 6 | 3.954840000  | 1.726447000  | 0.155703000  |
| 6 | 4.199823000  | -0.669515000 | -0.150818000 |
| 1 | 2.406864000  | -1.845367000 | -0.141976000 |
| 6 | 4.792478000  | 0.604075000  | -0.037667000 |
| 1 | 4.373380000  | 2.719471000  | 0.266443000  |
| 1 | 4.826116000  | -1.537301000 | -0.331216000 |
| 8 | -0.669803000 | 2.606729000  | 0.516076000  |
| 8 | 0.669800000  | -2.606644000 | 0.516385000  |
| 7 | 1.617177000  | 2.506889000  | 0.393212000  |
| 7 | -1.617163000 | -2.506875000 | 0.393104000  |
| 6 | -1.854837000 | -3.927780000 | 0.542877000  |
| 1 | -2.459081000 | -4.129468000 | 1.433646000  |
| 1 | -2.367514000 | -4.332723000 | -0.336351000 |
| 1 | -0.883224000 | -4.410117000 | 0.648973000  |
| 6 | 1.854848000  | 3.927834000  | 0.542638000  |
| 1 | 2.458970000  | 4.129757000  | 1.433435000  |
| 1 | 2.367654000  | 4.332526000  | -0.336631000 |
| 1 | 0.883227000  | 4.410211000  | 0.648472000  |
| 6 | -6.234620000 | -0.782334000 | -0.122201000 |
| 6 | -6.946436000 | -1.948785000 | -0.373060000 |

|    |               |              |              |
|----|---------------|--------------|--------------|
| 16 | -7.337793000  | 0.561342000  | 0.102651000  |
| 6  | -8.338669000  | -1.775587000 | -0.397617000 |
| 1  | -6.465577000  | -2.899831000 | -0.565468000 |
| 6  | -8.742861000  | -0.463321000 | -0.162016000 |
| 1  | -9.040110000  | -2.578373000 | -0.594357000 |
| 6  | 6.234625000   | 0.782351000  | -0.122201000 |
| 6  | 6.946451000   | 1.948807000  | -0.373014000 |
| 16 | 7.337785000   | -0.561340000 | 0.102616000  |
| 6  | 8.338682000   | 1.775596000  | -0.397571000 |
| 1  | 6.465600000   | 2.899861000  | -0.565392000 |
| 6  | 8.742862000   | 0.463318000  | -0.162024000 |
| 1  | 9.040132000   | 2.578382000  | -0.594284000 |
| 6  | -10.065016000 | 0.059673000  | -0.116796000 |
| 6  | -10.469610000 | 1.393941000  | 0.083075000  |
| 16 | -11.495326000 | -0.932470000 | -0.314160000 |
| 1  | -9.769561000  | 2.210327000  | 0.230061000  |
| 6  | -12.490223000 | 0.530383000  | -0.112991000 |
| 6  | 10.065012000  | -0.059694000 | -0.116830000 |
| 6  | 10.469590000  | -1.393982000 | 0.082945000  |
| 16 | 11.495334000  | 0.932447000  | -0.314112000 |
| 1  | 9.769531000   | -2.210371000 | 0.229864000  |
| 6  | 12.490213000  | -0.530429000 | -0.113028000 |
| 6  | 13.893319000  | -0.496273000 | -0.160594000 |
| 6  | -13.893327000 | 0.496219000  | -0.160592000 |
| 6  | 14.652599000  | -1.684571000 | 0.005727000  |
| 7  | 15.303924000  | -2.642220000 | 0.138442000  |
| 6  | 14.583606000  | 0.724630000  | -0.375462000 |
| 7  | 15.124327000  | 1.743059000  | -0.553709000 |
| 6  | -14.583598000 | -0.724671000 | -0.375581000 |
| 7  | -15.124306000 | -1.743088000 | -0.553932000 |
| 6  | -14.652619000 | 1.684504000  | 0.005764000  |
| 7  | -15.303955000 | 2.642138000  | 0.138530000  |
| 7  | -11.775533000 | 1.647988000  | 0.085136000  |
| 7  | 11.775510000  | -1.648040000 | 0.085009000  |

**S4IIDT-OS**

E=-3572.083784 Hartree

|   |              |              |              |
|---|--------------|--------------|--------------|
| 6 | -2.549293000 | 1.596867000  | -0.630174000 |
| 6 | -1.959281000 | 0.300245000  | -0.530215000 |
| 6 | -2.828384000 | -0.778378000 | -0.278892000 |
| 6 | -4.192805000 | -0.561673000 | -0.162318000 |
| 6 | -4.769089000 | 0.726232000  | -0.287448000 |
| 6 | -3.903488000 | 1.826587000  | -0.522360000 |
| 6 | -0.302136000 | 1.951372000  | -0.825438000 |

|    |               |              |              |
|----|---------------|--------------|--------------|
| 6  | -0.520293000  | 0.461010000  | -0.643600000 |
| 1  | -2.431653000  | -1.778370000 | -0.199741000 |
| 1  | -4.834837000  | -1.417571000 | 0.018377000  |
| 1  | -4.292396000  | 2.834372000  | -0.599576000 |
| 6  | 0.520297000   | -0.461020000 | -0.643606000 |
| 6  | 1.959282000   | -0.300256000 | -0.530178000 |
| 6  | 0.302148000   | -1.951376000 | -0.825510000 |
| 6  | 2.549300000   | -1.596872000 | -0.630185000 |
| 6  | 2.828375000   | 0.778358000  | -0.278785000 |
| 6  | 3.903494000   | -1.826592000 | -0.522352000 |
| 6  | 4.192794000   | 0.561652000  | -0.162189000 |
| 1  | 2.431639000   | 1.778345000  | -0.199596000 |
| 6  | 4.769086000   | -0.726245000 | -0.287368000 |
| 1  | 4.292407000   | -2.834372000 | -0.599607000 |
| 1  | 4.834819000   | 1.417543000  | 0.018561000  |
| 8  | -0.734162000  | -2.578902000 | -0.994929000 |
| 8  | 0.734183000   | 2.578905000  | -0.994783000 |
| 7  | 1.554547000   | -2.546778000 | -0.822936000 |
| 7  | -1.554532000  | 2.546780000  | -0.822855000 |
| 6  | -1.755455000  | 3.969702000  | -0.994272000 |
| 1  | -2.374934000  | 4.172975000  | -1.874473000 |
| 1  | -2.235474000  | 4.407194000  | -0.111859000 |
| 1  | -0.772865000  | 4.421222000  | -1.132221000 |
| 6  | 1.755479000   | -3.969690000 | -0.994426000 |
| 1  | 2.374974000   | -4.172913000 | -1.874627000 |
| 1  | 2.235484000   | -4.407227000 | -0.112028000 |
| 1  | 0.772893000   | -4.421208000 | -1.132416000 |
| 6  | -6.193834000  | 0.927266000  | -0.175495000 |
| 6  | -6.910187000  | 2.119445000  | -0.358963000 |
| 16 | -7.287304000  | -0.392532000 | 0.233147000  |
| 6  | -8.280071000  | 1.990630000  | -0.183751000 |
| 1  | -6.438673000  | 3.057231000  | -0.625246000 |
| 6  | -8.691257000  | 0.678030000  | 0.148416000  |
| 1  | -8.984377000  | 2.807530000  | -0.291355000 |
| 6  | 6.193829000   | -0.927280000 | -0.175392000 |
| 6  | 6.910189000   | -2.119448000 | -0.358898000 |
| 16 | 7.287283000   | 0.392498000  | 0.233359000  |
| 6  | 8.280071000   | -1.990633000 | -0.183669000 |
| 1  | 6.438683000   | -3.057224000 | -0.625230000 |
| 6  | 8.691248000   | -0.678042000 | 0.148548000  |
| 1  | 8.984383000   | -2.807523000 | -0.291308000 |
| 6  | -9.988574000  | 0.237816000  | 0.385557000  |
| 6  | -10.332646000 | -1.141207000 | 0.722041000  |
| 16 | -11.420228000 | 1.263474000  | 0.318555000  |



|    |               |              |             |
|----|---------------|--------------|-------------|
| 6  | -12.493846000 | -0.146390000 | 0.739280000 |
| 6  | 9.988562000   | -0.237827000 | 0.385698000 |
| 6  | 10.332623000  | 1.141181000  | 0.722253000 |
| 16 | 11.420224000  | -1.263470000 | 0.318647000 |
| 6  | 12.493851000  | 0.146423000  | 0.739253000 |
| 7  | -11.718924000 | -1.276031000 | 0.900310000 |
| 7  | 11.718920000  | 1.276049000  | 0.900339000 |
| 6  | -12.336547000 | -2.552690000 | 1.243685000 |
| 1  | -13.049023000 | -2.846041000 | 0.469493000 |
| 1  | -11.535000000 | -3.286967000 | 1.316661000 |
| 1  | -12.863085000 | -2.471342000 | 2.197203000 |
| 6  | 12.336554000  | 2.552740000  | 1.243577000 |
| 1  | 13.048925000  | 2.846076000  | 0.469282000 |
| 1  | 11.534997000  | 3.286999000  | 1.316625000 |
| 1  | 12.863215000  | 2.471446000  | 2.197032000 |
| 8  | -13.693828000 | -0.075413000 | 0.853458000 |
| 8  | -9.542197000  | -2.070948000 | 0.839303000 |
| 8  | 9.542182000   | 2.070941000  | 0.839416000 |
| 8  | 13.693852000  | 0.075487000  | 0.853257000 |

**S5IIDT-OS**

E=-3115.008962 Hartree

|   |              |              |              |
|---|--------------|--------------|--------------|
| 6 | -2.557915000 | 1.580694000  | -0.709614000 |
| 6 | -1.960324000 | 0.287548000  | -0.602664000 |
| 6 | -2.819945000 | -0.797076000 | -0.344595000 |
| 6 | -4.185778000 | -0.590103000 | -0.230048000 |
| 6 | -4.769946000 | 0.693765000  | -0.364500000 |
| 6 | -3.914177000 | 1.800136000  | -0.604870000 |
| 6 | -0.313964000 | 1.950923000  | -0.901060000 |
| 6 | -0.522455000 | 0.457526000  | -0.715360000 |
| 1 | -2.415637000 | -1.793462000 | -0.259609000 |
| 1 | -4.822326000 | -1.449201000 | -0.046776000 |
| 1 | -4.311602000 | 2.804302000  | -0.684274000 |
| 6 | 0.522456000  | -0.457475000 | -0.715376000 |
| 6 | 1.960325000  | -0.287507000 | -0.602670000 |
| 6 | 0.313955000  | -1.950870000 | -0.901091000 |
| 6 | 2.557905000  | -1.580659000 | -0.709612000 |
| 6 | 2.819957000  | 0.797114000  | -0.344624000 |
| 6 | 3.914165000  | -1.800113000 | -0.604861000 |
| 6 | 4.185789000  | 0.590129000  | -0.230074000 |
| 1 | 2.415655000  | 1.793503000  | -0.259655000 |
| 6 | 4.769944000  | -0.693746000 | -0.364502000 |
| 1 | 4.311583000  | -2.804283000 | -0.684250000 |
| 1 | 4.822345000  | 1.449225000  | -0.046818000 |

|    |               |              |              |
|----|---------------|--------------|--------------|
| 8  | -0.719103000  | -2.582014000 | -1.069324000 |
| 8  | 0.719094000   | 2.582084000  | -1.069246000 |
| 7  | 1.570197000   | -2.536651000 | -0.904323000 |
| 7  | -1.570212000  | 2.536693000  | -0.904313000 |
| 6  | -1.781726000  | 3.958532000  | -1.081058000 |
| 1  | -2.400510000  | 4.153065000  | -1.963407000 |
| 1  | -2.266473000  | 4.394342000  | -0.200703000 |
| 1  | -0.802656000  | 4.417489000  | -1.218561000 |
| 6  | 1.781704000   | -3.958489000 | -1.081085000 |
| 1  | 2.400515000   | -4.153012000 | -1.963417000 |
| 1  | 2.266417000   | -4.394320000 | -0.200722000 |
| 1  | 0.802634000   | -4.417434000 | -1.218627000 |
| 6  | -6.196976000  | 0.883942000  | -0.255465000 |
| 6  | -6.922971000  | 2.061990000  | -0.485053000 |
| 16 | -7.275372000  | -0.426348000 | 0.209313000  |
| 6  | -8.289660000  | 1.919549000  | -0.299711000 |
| 1  | -6.466407000  | 2.993950000  | -0.794136000 |
| 6  | -8.686686000  | 0.618141000  | 0.086921000  |
| 1  | -8.991792000  | 2.731077000  | -0.443591000 |
| 6  | 6.196972000   | -0.883936000 | -0.255463000 |
| 6  | 6.922957000   | -2.061991000 | -0.485046000 |
| 16 | 7.275378000   | 0.426346000  | 0.209316000  |
| 6  | 8.289648000   | -1.919560000 | -0.299705000 |
| 1  | 6.466386000   | -2.993947000 | -0.794129000 |
| 6  | 8.686684000   | -0.618155000 | 0.086925000  |
| 1  | 8.991773000   | -2.731095000 | -0.443582000 |
| 6  | 10.005308000  | -0.178991000 | 0.349050000  |
| 6  | 11.120669000  | -1.042653000 | 0.249539000  |
| 6  | 10.236511000  | 1.225955000  | 0.739961000  |
| 6  | 12.398469000  | -0.606431000 | 0.503529000  |
| 1  | 10.978660000  | -2.079263000 | -0.033607000 |
| 6  | 12.678062000  | 0.788107000  | 0.894523000  |
| 6  | -10.005307000 | 0.178967000  | 0.349046000  |
| 6  | -11.120674000 | 1.042623000  | 0.249545000  |
| 6  | -10.236499000 | -1.225982000 | 0.739952000  |
| 6  | -12.398470000 | 0.606391000  | 0.503536000  |
| 1  | -10.978671000 | 2.079237000  | -0.033589000 |
| 6  | -12.678054000 | -0.788153000 | 0.894517000  |
| 6  | 13.507756000  | -1.493039000 | 0.397187000  |
| 7  | 14.385152000  | -2.252065000 | 0.298264000  |
| 6  | -13.507762000 | 1.492994000  | 0.397211000  |
| 7  | -14.385163000 | 2.252017000  | 0.298302000  |
| 8  | 9.316777000   | 2.036783000  | 0.850977000  |
| 8  | -9.316757000  | -2.036798000 | 0.850987000  |

|   |               |              |             |
|---|---------------|--------------|-------------|
| 8 | -13.805199000 | -1.199663000 | 1.124911000 |
| 8 | 13.805213000  | 1.199613000  | 1.124902000 |
| 7 | 11.548786000  | 1.622139000  | 0.985989000 |
| 7 | -11.548773000 | -1.622182000 | 0.985961000 |
| 6 | -11.747110000 | -3.025010000 | 1.371525000 |
| 1 | -11.375813000 | -3.680642000 | 0.581471000 |
| 1 | -11.190239000 | -3.238471000 | 2.285987000 |
| 1 | -12.812359000 | -3.175336000 | 1.526505000 |
| 6 | 11.747133000  | 3.024964000  | 1.371562000 |
| 1 | 11.376081000  | 3.680612000  | 0.581404000 |
| 1 | 11.190051000  | 3.238479000  | 2.285881000 |
| 1 | 12.812356000  | 3.175218000  | 1.526787000 |

**S6IIDT-OS** E=-3837.652402 Hartree

|   |              |              |             |
|---|--------------|--------------|-------------|
| 6 | -2.530468000 | -1.625639000 | 0.740258000 |
| 6 | -1.946866000 | -0.322066000 | 0.630529000 |
| 6 | -2.819764000 | 0.751949000  | 0.353807000 |
| 6 | -4.177540000 | 0.526385000  | 0.224524000 |
| 6 | -4.750481000 | -0.768326000 | 0.360712000 |
| 6 | -3.879783000 | -1.863389000 | 0.620856000 |
| 6 | -0.283982000 | -1.953812000 | 0.966417000 |
| 6 | -0.516801000 | -0.468805000 | 0.760648000 |
| 1 | -2.426329000 | 1.752758000  | 0.266578000 |
| 1 | -4.823394000 | 1.373106000  | 0.018538000 |
| 1 | -4.266548000 | -2.870300000 | 0.714228000 |
| 6 | 0.516805000  | 0.468797000  | 0.760681000 |
| 6 | 1.946872000  | 0.322058000  | 0.630597000 |
| 6 | 0.283991000  | 1.953794000  | 0.966538000 |
| 6 | 2.530471000  | 1.625636000  | 0.740288000 |
| 6 | 2.819772000  | -0.751959000 | 0.353888000 |
| 6 | 3.879782000  | 1.863390000  | 0.620857000 |
| 6 | 4.177546000  | -0.526394000 | 0.224592000 |
| 1 | 2.426335000  | -1.752769000 | 0.266671000 |
| 6 | 4.750483000  | 0.768322000  | 0.360742000 |
| 1 | 4.266543000  | 2.870306000  | 0.714190000 |
| 1 | 4.823401000  | -1.373117000 | 0.018616000 |
| 8 | -0.758509000 | 2.563116000  | 1.156803000 |
| 8 | 0.758497000  | -2.563110000 | 1.156872000 |
| 7 | 1.530574000  | 2.562525000  | 0.958297000 |
| 7 | -1.530576000 | -2.562523000 | 0.958302000 |
| 6 | -1.720179000 | -3.985605000 | 1.148925000 |
| 1 | -2.346128000 | -4.180975000 | 2.026015000 |
| 1 | -2.186821000 | -4.439623000 | 0.268004000 |

|    |               |              |              |
|----|---------------|--------------|--------------|
| 1  | -0.735049000  | -4.425966000 | 1.303330000  |
| 6  | 1.720166000   | 3.985624000  | 1.148801000  |
| 1  | 2.346160000   | 4.181067000  | 2.025842000  |
| 1  | 2.186753000   | 4.439586000  | 0.267822000  |
| 1  | 0.735038000   | 4.425982000  | 1.303231000  |
| 6  | -6.164164000  | -0.974187000 | 0.234110000  |
| 6  | -6.869885000  | -2.187910000 | 0.360037000  |
| 16 | -7.272948000  | 0.351545000  | -0.119184000 |
| 6  | -8.232156000  | -2.069305000 | 0.183219000  |
| 1  | -6.390636000  | -3.134015000 | 0.579522000  |
| 6  | -8.665460000  | -0.737377000 | -0.094215000 |
| 1  | -8.943055000  | -2.879216000 | 0.240758000  |
| 6  | 6.164163000   | 0.974186000  | 0.234120000  |
| 6  | 6.869881000   | 2.187917000  | 0.360003000  |
| 16 | 7.272949000   | -0.351551000 | -0.119151000 |
| 6  | 8.232150000   | 2.069312000  | 0.183177000  |
| 1  | 6.390629000   | 3.134026000  | 0.579464000  |
| 6  | 8.665458000   | 0.737377000  | -0.094220000 |
| 1  | 8.943046000   | 2.879227000  | 0.240686000  |
| 6  | 9.977687000   | 0.294570000  | -0.321196000 |
| 6  | 11.105938000  | 1.226435000  | -0.294643000 |
| 6  | 10.209067000  | -1.118630000 | -0.586821000 |
| 6  | 12.629073000  | -0.676639000 | -0.789335000 |
| 6  | -9.977688000  | -0.294570000 | -0.321195000 |
| 6  | -11.105945000 | -1.226427000 | -0.294607000 |
| 6  | -10.209062000 | 1.118623000  | -0.586862000 |
| 6  | -12.629071000 | 0.676641000  | -0.789349000 |
| 8  | 9.292078000   | -1.940670000 | -0.621676000 |
| 8  | -9.292066000  | 1.940655000  | -0.621760000 |
| 7  | 11.535876000  | -1.526434000 | -0.806372000 |
| 7  | -11.535869000 | 1.526428000  | -0.806421000 |
| 6  | -11.753726000 | 2.957854000  | -1.071300000 |
| 1  | -12.420089000 | 3.375621000  | -0.315533000 |
| 1  | -10.781483000 | 3.441216000  | -1.039414000 |
| 1  | -12.218836000 | 3.085645000  | -2.049649000 |
| 6  | 11.753741000  | -2.957868000 | -1.071202000 |
| 1  | 12.420110000  | -3.375605000 | -0.315424000 |
| 1  | 10.781501000  | -3.441235000 | -1.039294000 |
| 1  | 12.218847000  | -3.085689000 | -2.049549000 |
| 7  | 12.381445000  | 0.661504000  | -0.536660000 |
| 7  | -12.381451000 | -0.661495000 | -0.536633000 |
| 6  | 13.523523000  | 1.590444000  | -0.512745000 |
| 1  | 14.232695000  | 1.283556000  | 0.257185000  |
| 1  | 14.033431000  | 1.572993000  | -1.476888000 |

|    |               |              |              |
|----|---------------|--------------|--------------|
| 1  | 13.128006000  | 2.579525000  | -0.302145000 |
| 6  | -13.523534000 | -1.590428000 | -0.512681000 |
| 1  | -14.232699000 | -1.283511000 | 0.257243000  |
| 1  | -14.033449000 | -1.573003000 | -1.476822000 |
| 1  | -13.128022000 | -2.579505000 | -0.302054000 |
| 8  | -11.007845000 | -2.431559000 | -0.080892000 |
| 8  | 11.007830000  | 2.431573000  | -0.080968000 |
| 16 | 14.178890000  | -1.246716000 | -1.062991000 |
| 16 | -14.178886000 | 1.246719000  | -1.063018000 |

**S7IIDT-OS**

E=-3345.513124 Hartree

|   |              |              |              |
|---|--------------|--------------|--------------|
| 6 | -2.515814000 | 1.648193000  | -1.067348000 |
| 6 | -1.952378000 | 0.338842000  | -0.962805000 |
| 6 | -2.840538000 | -0.724136000 | -0.709365000 |
| 6 | -4.200170000 | -0.481709000 | -0.591801000 |
| 6 | -4.747974000 | 0.818630000  | -0.719516000 |
| 6 | -3.865347000 | 1.903716000  | -0.959584000 |
| 6 | -0.263251000 | 1.958894000  | -1.258475000 |
| 6 | -0.510746000 | 0.471189000  | -1.075740000 |
| 1 | -2.463315000 | -1.731853000 | -0.634623000 |
| 1 | -4.862909000 | -1.325146000 | -0.428625000 |
| 1 | -4.238126000 | 2.918345000  | -1.025624000 |
| 6 | 0.510743000  | -0.470987000 | -1.075814000 |
| 6 | 1.952375000  | -0.338663000 | -0.962838000 |
| 6 | 0.263246000  | -1.958661000 | -1.258801000 |
| 6 | 2.515809000  | -1.647996000 | -1.067615000 |
| 6 | 2.840535000  | 0.724267000  | -0.709198000 |
| 6 | 3.865341000  | -1.903541000 | -0.959889000 |
| 6 | 4.200166000  | 0.481815000  | -0.591669000 |
| 1 | 2.463314000  | 1.731971000  | -0.634278000 |
| 6 | 4.747969000  | -0.818501000 | -0.719618000 |
| 1 | 4.238117000  | -2.918159000 | -1.026114000 |
| 1 | 4.862905000  | 1.325221000  | -0.428335000 |
| 8 | -0.785634000 | -2.563224000 | -1.425722000 |
| 8 | 0.785631000  | 2.563494000  | -1.425249000 |
| 7 | 1.503619000  | -2.577700000 | -1.259668000 |
| 7 | -1.503624000 | 2.577934000  | -1.259222000 |
| 6 | -1.677628000 | 4.005086000  | -1.434675000 |
| 1 | -2.292254000 | 4.216343000  | -2.316036000 |
| 1 | -2.149661000 | 4.452904000  | -0.553443000 |
| 1 | -0.686901000 | 4.437995000  | -1.573158000 |
| 6 | 1.677623000  | -4.004819000 | -1.435393000 |
| 1 | 2.292248000  | -4.215909000 | -2.316794000 |

|    |               |              |              |
|----|---------------|--------------|--------------|
| 1  | 2.149656000   | -4.452804000 | -0.554246000 |
| 1  | 0.686895000   | -4.437701000 | -1.573956000 |
| 6  | -6.165515000  | 1.052306000  | -0.601833000 |
| 6  | -6.881575000  | 2.214743000  | -0.932027000 |
| 16 | -7.256713000  | -0.177239000 | 0.003538000  |
| 6  | -8.244746000  | 2.126654000  | -0.706948000 |
| 1  | -6.408912000  | 3.092925000  | -1.354017000 |
| 6  | -8.663449000  | 0.868929000  | -0.194332000 |
| 1  | -8.959195000  | 2.916064000  | -0.891188000 |
| 6  | 6.165509000   | -1.052201000 | -0.601968000 |
| 6  | 6.881567000   | -2.214583000 | -0.932360000 |
| 16 | 7.256706000   | 0.177236000  | 0.003621000  |
| 6  | 8.244738000   | -2.126535000 | -0.707260000 |
| 1  | 6.408904000   | -3.092691000 | -1.354501000 |
| 6  | 8.663442000   | -0.868899000 | -0.194429000 |
| 1  | 8.959185000   | -2.915916000 | -0.891632000 |
| 6  | 9.964501000   | -0.560080000 | 0.234624000  |
| 6  | 10.943391000  | -1.655046000 | 0.553885000  |
| 6  | 10.559631000  | 0.689300000  | 0.663242000  |
| 6  | 12.000384000  | -1.024351000 | 1.379168000  |
| 6  | 11.752351000  | 0.355565000  | 1.492865000  |
| 6  | 13.082472000  | -1.640739000 | 1.991331000  |
| 6  | 12.610701000  | 1.141766000  | 2.265531000  |
| 6  | 13.938102000  | -0.850385000 | 2.762519000  |
| 1  | 13.239655000  | -2.707118000 | 1.865497000  |
| 6  | 13.694627000  | 0.520757000  | 2.897844000  |
| 1  | 12.456426000  | 2.204453000  | 2.393576000  |
| 1  | 14.791851000  | -1.298046000 | 3.261647000  |
| 1  | 14.361062000  | 1.123991000  | 3.506715000  |
| 6  | -9.964509000  | 0.560033000  | 0.234664000  |
| 6  | -10.943408000 | 1.654938000  | 0.554107000  |
| 6  | -10.559634000 | -0.689423000 | 0.663065000  |
| 6  | -12.000384000 | 1.024100000  | 1.379303000  |
| 6  | -11.752349000 | -0.355836000 | 1.492756000  |
| 6  | -13.082462000 | 1.640382000  | 1.991591000  |
| 6  | -12.610688000 | -1.142171000 | 2.265295000  |
| 6  | -13.938081000 | 0.849893000  | 2.762653000  |
| 1  | -13.239648000 | 2.706783000  | 1.865945000  |
| 6  | -13.694605000 | -0.521273000 | 2.897733000  |
| 1  | -12.456410000 | -2.204881000 | 2.393154000  |
| 1  | -14.791823000 | 1.297466000  | 3.261871000  |
| 1  | -14.361031000 | -1.124614000 | 3.506508000  |
| 8  | -10.884206000 | 2.835987000  | 0.244322000  |
| 8  | 10.884203000  | -2.836034000 | 0.243864000  |

|   |               |              |              |
|---|---------------|--------------|--------------|
| 6 | -10.220575000 | -1.974776000 | 0.257628000  |
| 6 | 10.220577000  | 1.974725000  | 0.258026000  |
| 6 | -9.353573000  | -2.264643000 | -0.838324000 |
| 7 | -8.700860000  | -2.559560000 | -1.757478000 |
| 6 | -10.830008000 | -3.143542000 | 0.807929000  |
| 7 | -11.291697000 | -4.118781000 | 1.248347000  |
| 6 | 10.830020000  | 3.143392000  | 0.808525000  |
| 7 | 11.291715000  | 4.118555000  | 1.249107000  |
| 6 | 9.353580000   | 2.264785000  | -0.837878000 |
| 7 | 8.700873000   | 2.559869000  | -1.756983000 |

**S8IIDT-OS**

E=-4215.952936 Hartree

|   |              |              |              |
|---|--------------|--------------|--------------|
| 6 | 2.562460000  | -1.573121000 | -1.110109000 |
| 6 | 1.965590000  | -0.280680000 | -1.004255000 |
| 6 | 2.824075000  | 0.806184000  | -0.760372000 |
| 6 | 4.192870000  | 0.601866000  | -0.653939000 |
| 6 | 4.771692000  | -0.681652000 | -0.783677000 |
| 6 | 3.920791000  | -1.791156000 | -1.012926000 |
| 6 | 0.318607000  | -1.951734000 | -1.279946000 |
| 6 | 0.522834000  | -0.454544000 | -1.107032000 |
| 1 | 2.419842000  | 1.803078000  | -0.684135000 |
| 1 | 4.834361000  | 1.463874000  | -0.503126000 |
| 1 | 4.322556000  | -2.795128000 | -1.073617000 |
| 6 | -0.522933000 | 0.455022000  | -1.106815000 |
| 6 | -1.965679000 | 0.281109000  | -1.003997000 |
| 6 | -0.318729000 | 1.952281000  | -1.279163000 |
| 6 | -2.562565000 | 1.573588000  | -1.109283000 |
| 6 | -2.824137000 | -0.805859000 | -0.760478000 |
| 6 | -3.920891000 | 1.791575000  | -1.011900000 |
| 6 | -4.192925000 | -0.601593000 | -0.653849000 |
| 1 | -2.419890000 | -1.802781000 | -0.684673000 |
| 6 | -4.771765000 | 0.681973000  | -0.783025000 |
| 1 | -4.322667000 | 2.795569000  | -1.072153000 |
| 1 | -4.834398000 | -1.463665000 | -0.503330000 |
| 8 | 0.712816000  | 2.588888000  | -1.432042000 |
| 8 | -0.712953000 | -2.588270000 | -1.433019000 |
| 7 | -1.576308000 | 2.533416000  | -1.288419000 |
| 7 | 1.576182000  | -2.532872000 | -1.289550000 |
| 6 | 1.791478000  | -3.955694000 | -1.458128000 |
| 1 | 2.404744000  | -4.153260000 | -2.343486000 |
| 1 | 2.284149000  | -4.383199000 | -0.578249000 |
| 1 | 0.813248000  | -4.419129000 | -1.585616000 |
| 6 | -1.791625000 | 3.956306000  | -1.456398000 |

|    |               |              |              |
|----|---------------|--------------|--------------|
| 1  | -2.404970000  | 4.154230000  | -2.341621000 |
| 1  | -2.284220000  | 4.383451000  | -0.576301000 |
| 1  | -0.813409000  | 4.419798000  | -1.583783000 |
| 6  | 6.200752000   | -0.878701000 | -0.679725000 |
| 6  | 6.949386000   | -1.989754000 | -1.088924000 |
| 16 | 7.245513000   | 0.338403000  | 0.017220000  |
| 6  | 8.311975000   | -1.869529000 | -0.854769000 |
| 1  | 6.505920000   | -2.846676000 | -1.579973000 |
| 6  | 8.682399000   | -0.642393000 | -0.256338000 |
| 1  | 9.044630000   | -2.615488000 | -1.136659000 |
| 6  | -6.200817000  | 0.878972000  | -0.678875000 |
| 6  | -6.949495000  | 1.990175000  | -1.087586000 |
| 16 | -7.245509000  | -0.338406000 | 0.017696000  |
| 6  | -8.312063000  | 1.869852000  | -0.853357000 |
| 1  | -6.506078000  | 2.847286000  | -1.578350000 |
| 6  | -8.682424000  | 0.642487000  | -0.255357000 |
| 1  | -9.044748000  | 2.615912000  | -1.134899000 |
| 6  | -9.972660000  | 0.321082000  | 0.199498000  |
| 6  | -10.603792000 | -0.892758000 | 0.590295000  |
| 6  | -12.182620000 | 0.706506000  | 1.493765000  |
| 6  | -11.804263000 | -0.643881000 | 1.442715000  |
| 6  | -13.289835000 | 1.173647000  | 2.183919000  |
| 6  | -12.591526000 | -1.560022000 | 2.155587000  |
| 6  | -14.062195000 | 0.243228000  | 2.881423000  |
| 1  | -13.538017000 | 2.229706000  | 2.184184000  |
| 6  | -13.704786000 | -1.107014000 | 2.866383000  |
| 1  | -12.349783000 | -2.612755000 | 2.175571000  |
| 1  | -14.933778000 | 0.571283000  | 3.438378000  |
| 1  | -14.300969000 | -1.826754000 | 3.418164000  |
| 6  | 9.972679000   | -0.321172000 | 0.198522000  |
| 6  | 10.603856000  | 0.892511000  | 0.589730000  |
| 6  | 12.182734000  | -0.707115000 | 1.492471000  |
| 6  | 11.804385000  | 0.643295000  | 1.441970000  |
| 6  | 13.289992000  | -1.174533000 | 2.182368000  |
| 6  | 12.591706000  | 1.559154000  | 2.155143000  |
| 6  | 14.062408000  | -0.244391000 | 2.880179000  |
| 1  | 13.538164000  | -2.230594000 | 2.182208000  |
| 6  | 13.705010000  | 1.105860000  | 2.865687000  |
| 1  | 12.349973000  | 2.611881000  | 2.175552000  |
| 1  | 14.934027000  | -0.572670000 | 3.436947000  |
| 1  | 14.301237000  | 1.825381000  | 3.417706000  |
| 6  | 10.228021000  | 2.162267000  | 0.119066000  |
| 6  | -10.227971000 | -2.162332000 | 0.119129000  |
| 6  | 9.376863000   | 2.353466000  | -1.007252000 |



|    |               |              |              |
|----|---------------|--------------|--------------|
| 7  | 8.724918000   | 2.567143000  | -1.949966000 |
| 6  | 10.752581000  | 3.387378000  | 0.621069000  |
| 7  | 11.135777000  | 4.418043000  | 1.010392000  |
| 6  | -10.752471000 | -3.387637000 | 0.620718000  |
| 7  | -11.135631000 | -4.418447000 | 1.009691000  |
| 6  | -9.376890000  | -2.353097000 | -1.007321000 |
| 7  | -8.724997000  | -2.566406000 | -1.950154000 |
| 16 | 11.052646000  | -1.735406000 | 0.581891000  |
| 16 | -11.052606000 | 1.735159000  | 0.583503000  |
| 8  | 11.662674000  | -2.265860000 | -0.648214000 |
| 8  | 10.370491000  | -2.669602000 | 1.489056000  |
| 8  | -10.370387000 | 2.669004000  | 1.490980000  |
| 8  | -11.662731000 | 2.266091000  | -0.646349000 |

**S9IIDT-OS**

E=-4187.833894 Hartree

|   |              |              |             |
|---|--------------|--------------|-------------|
| 6 | 2.531162000  | 1.631879000  | 0.689724000 |
| 6 | 1.949673000  | 0.328488000  | 0.589608000 |
| 6 | 2.832342000  | -0.740154000 | 0.328682000 |
| 6 | 4.190983000  | -0.508185000 | 0.201365000 |
| 6 | 4.759374000  | 0.786746000  | 0.323728000 |
| 6 | 3.879861000  | 1.877255000  | 0.570576000 |
| 6 | 0.279681000  | 1.949976000  | 0.910636000 |
| 6 | 0.517000000  | 0.471151000  | 0.716073000 |
| 1 | 2.444889000  | -1.744397000 | 0.251507000 |
| 1 | 4.840644000  | -1.356316000 | 0.008156000 |
| 1 | 4.258841000  | 2.888595000  | 0.655159000 |
| 6 | -0.517001000 | -0.471127000 | 0.716087000 |
| 6 | -1.949675000 | -0.328468000 | 0.589626000 |
| 6 | -0.279681000 | -1.949947000 | 0.910689000 |
| 6 | -2.531161000 | -1.631859000 | 0.689755000 |
| 6 | -2.832346000 | 0.740168000  | 0.328685000 |
| 6 | -3.879859000 | -1.877240000 | 0.570604000 |
| 6 | -4.190987000 | 0.508195000  | 0.201368000 |
| 1 | -2.444895000 | 1.744411000  | 0.251495000 |
| 6 | -4.759375000 | -0.786736000 | 0.323745000 |
| 1 | -4.258836000 | -2.888581000 | 0.655195000 |
| 1 | -4.840649000 | 1.356322000  | 0.008147000 |
| 8 | 0.762810000  | -2.567215000 | 1.095497000 |
| 8 | -0.762805000 | 2.567245000  | 1.095472000 |
| 7 | -1.525631000 | -2.566178000 | 0.897776000 |
| 7 | 1.525634000  | 2.566201000  | 0.897737000 |
| 6 | 1.705776000  | 3.989191000  | 1.075768000 |
| 1 | 2.330363000  | 4.199226000  | 1.951333000 |

|    |               |              |              |
|----|---------------|--------------|--------------|
| 1  | 2.171169000   | 4.441501000  | 0.192408000  |
| 1  | 0.716749000   | 4.423258000  | 1.225372000  |
| 6  | -1.705769000  | -3.989168000 | 1.075806000  |
| 1  | -2.330364000  | -4.199204000 | 1.951365000  |
| 1  | -2.171150000  | -4.441481000 | 0.192442000  |
| 1  | -0.716741000  | -4.423230000 | 1.225421000  |
| 6  | 6.172288000   | 1.004201000  | 0.200763000  |
| 6  | 6.888728000   | 2.206531000  | 0.312080000  |
| 16 | 7.295316000   | -0.322355000 | -0.134928000 |
| 6  | 8.259325000   | 2.090864000  | 0.141067000  |
| 1  | 6.404387000   | 3.152942000  | 0.519477000  |
| 6  | 8.695418000   | 0.766511000  | -0.117378000 |
| 1  | 8.945213000   | 2.928223000  | 0.199154000  |
| 6  | -6.172288000  | -1.004195000 | 0.200779000  |
| 6  | -6.888725000  | -2.206526000 | 0.312109000  |
| 16 | -7.295318000  | 0.322353000  | -0.134931000 |
| 6  | -8.259321000  | -2.090865000 | 0.141091000  |
| 1  | -6.404382000  | -3.152934000 | 0.519518000  |
| 6  | -8.695417000  | -0.766516000 | -0.117369000 |
| 1  | -8.945208000  | -2.928224000 | 0.199187000  |
| 6  | -9.988340000  | -0.319981000 | -0.330906000 |
| 16 | -10.384388000 | 1.372735000  | -0.640989000 |
| 16 | -11.376197000 | -1.419121000 | -0.312224000 |
| 6  | -12.130507000 | 1.133203000  | -0.789524000 |
| 6  | -12.597248000 | -0.181202000 | -0.634591000 |
| 6  | -13.026841000 | 2.173133000  | -1.047165000 |
| 6  | -13.962369000 | -0.459568000 | -0.736948000 |
| 6  | -14.388354000 | 1.890454000  | -1.148527000 |
| 1  | -12.664723000 | 3.189321000  | -1.166555000 |
| 6  | -14.853333000 | 0.581562000  | -0.994285000 |
| 1  | -14.323256000 | -1.476143000 | -0.616970000 |
| 1  | -15.087424000 | 2.696056000  | -1.348535000 |
| 1  | -15.914426000 | 0.368387000  | -1.074272000 |
| 6  | 9.988340000   | 0.319971000  | -0.330907000 |
| 16 | 10.384384000  | -1.372750000 | -0.640970000 |
| 16 | 11.376199000  | 1.419108000  | -0.312236000 |
| 6  | 12.130505000  | -1.133223000 | -0.789505000 |
| 6  | 12.597248000  | 0.181182000  | -0.634586000 |
| 6  | 13.026836000  | -2.173158000 | -1.047132000 |
| 6  | 13.962370000  | 0.459544000  | -0.736944000 |
| 6  | 14.388350000  | -1.890484000 | -1.148496000 |
| 1  | 12.664717000  | -3.189347000 | -1.166511000 |
| 6  | 14.853332000  | -0.581591000 | -0.994268000 |
| 1  | 14.323260000  | 1.476120000  | -0.616978000 |

|   |              |              |              |
|---|--------------|--------------|--------------|
| 1 | 15.087418000 | -2.696089000 | -1.348493000 |
| 1 | 15.914425000 | -0.368420000 | -1.074256000 |

**S10IIDT-OS** E=-3880.516605 Hartree

|    |              |              |              |
|----|--------------|--------------|--------------|
| 6  | -2.599668000 | -1.520568000 | 0.533407000  |
| 6  | -1.962613000 | -0.243587000 | 0.434038000  |
| 6  | -2.798715000 | 0.862034000  | 0.174741000  |
| 6  | -4.166367000 | 0.688780000  | 0.048071000  |
| 6  | -4.789795000 | -0.580360000 | 0.169541000  |
| 6  | -3.957855000 | -1.707676000 | 0.414836000  |
| 6  | -0.363846000 | -1.935986000 | 0.752824000  |
| 6  | -0.536892000 | -0.448143000 | 0.559594000  |
| 1  | -2.368592000 | 1.848791000  | 0.098135000  |
| 1  | -4.778965000 | 1.564356000  | -0.143928000 |
| 1  | -4.379911000 | -2.701889000 | 0.498793000  |
| 6  | 0.536900000  | 0.448221000  | 0.559535000  |
| 6  | 1.962617000  | 0.243656000  | 0.433988000  |
| 6  | 0.363844000  | 1.936103000  | 0.752501000  |
| 6  | 2.599662000  | 1.520666000  | 0.533068000  |
| 6  | 2.798728000  | -0.862021000 | 0.174953000  |
| 6  | 3.957846000  | 1.707756000  | 0.414447000  |
| 6  | 4.166377000  | -0.688784000 | 0.048238000  |
| 1  | 2.368599000  | -1.848793000 | 0.098566000  |
| 6  | 4.789794000  | 0.580389000  | 0.169409000  |
| 1  | 4.379896000  | 2.701992000  | 0.498166000  |
| 1  | 4.778983000  | -1.564401000 | -0.143553000 |
| 8  | -0.650914000 | 2.598437000  | 0.936195000  |
| 8  | 0.650912000  | -2.598303000 | 0.936604000  |
| 7  | 1.635266000  | 2.497838000  | 0.739503000  |
| 7  | -1.635279000 | -2.497704000 | 0.740044000  |
| 6  | -1.876689000 | -3.911662000 | 0.916929000  |
| 1  | -2.509473000 | -4.095327000 | 1.792560000  |
| 1  | -2.361593000 | -4.342704000 | 0.033407000  |
| 1  | -0.907266000 | -4.388170000 | 1.065743000  |
| 6  | 1.876676000  | 3.911820000  | 0.916199000  |
| 1  | 2.509500000  | 4.095596000  | 1.791779000  |
| 1  | 2.361536000  | 4.342757000  | 0.032602000  |
| 1  | 0.907257000  | 4.388342000  | 1.065000000  |
| 6  | -6.211316000 | -0.737103000 | 0.047288000  |
| 6  | -6.979015000 | -1.906391000 | 0.157600000  |
| 16 | -7.276638000 | 0.637149000  | -0.286541000 |
| 6  | -8.344379000 | -1.730748000 | -0.012766000 |
| 1  | -6.536411000 | -2.873332000 | 0.363678000  |

|    |               |              |              |
|----|---------------|--------------|--------------|
| 6  | -8.721943000  | -0.389673000 | -0.269413000 |
| 1  | -9.065962000  | -2.537714000 | 0.044628000  |
| 6  | 6.211313000   | 0.737116000  | 0.047114000  |
| 6  | 6.979003000   | 1.906435000  | 0.157162000  |
| 16 | 7.276644000   | -0.637203000 | -0.286409000 |
| 6  | 8.344368000   | 1.730763000  | -0.013167000 |
| 1  | 6.536393000   | 2.873419000  | 0.363025000  |
| 6  | 8.721942000   | 0.389634000  | -0.269514000 |
| 1  | 9.065945000   | 2.537747000  | 0.044046000  |
| 6  | 9.994993000   | -0.115253000 | -0.482376000 |
| 16 | 10.327921000  | -1.825442000 | -0.791598000 |
| 16 | 11.441248000  | 0.911057000  | -0.466552000 |
| 6  | 12.067723000  | -1.629068000 | -0.937115000 |
| 6  | 12.568928000  | -0.396033000 | -0.790550000 |
| 6  | -9.994991000  | 0.115176000  | -0.482383000 |
| 16 | -10.327907000 | 1.825297000  | -0.791995000 |
| 16 | -11.441255000 | -0.911119000 | -0.466317000 |
| 6  | -12.067711000 | 1.628905000  | -0.937457000 |
| 6  | -12.568926000 | 0.395907000  | -0.790608000 |
| 1  | -13.619390000 | 0.141082000  | -0.856681000 |
| 1  | -12.653214000 | 2.517127000  | -1.139616000 |
| 1  | 12.653232000  | -2.517332000 | -1.139073000 |
| 1  | 13.619389000  | -0.141214000 | -0.856686000 |

**S1IIDT-T1**

E= -2504.318994 Hartree

|   |              |              |              |
|---|--------------|--------------|--------------|
| 6 | 2.658193000  | 1.405474000  | 0.425597000  |
| 6 | 1.986307000  | 0.153446000  | 0.328286000  |
| 6 | 2.777580000  | -0.983183000 | 0.102608000  |
| 6 | 4.160071000  | -0.863108000 | 0.009059000  |
| 6 | 4.814448000  | 0.380793000  | 0.132308000  |
| 6 | 4.029478000  | 1.540683000  | 0.338715000  |
| 6 | 0.440286000  | 1.928668000  | 0.573806000  |
| 6 | 0.548556000  | 0.418803000  | 0.418470000  |
| 1 | 2.314542000  | -1.953923000 | 0.025007000  |
| 1 | 4.745268000  | -1.765025000 | -0.138530000 |
| 1 | 4.487943000  | 2.520171000  | 0.397105000  |
| 6 | -0.548555000 | -0.418800000 | 0.418480000  |
| 6 | -1.986305000 | -0.153444000 | 0.328282000  |
| 6 | -0.440288000 | -1.928661000 | 0.573858000  |
| 6 | -2.658194000 | -1.405466000 | 0.425643000  |
| 6 | -2.777575000 | 0.983179000  | 0.102562000  |
| 6 | -4.029480000 | -1.540674000 | 0.338771000  |
| 6 | -4.160066000 | 0.863104000  | 0.009021000  |

|    |               |              |              |
|----|---------------|--------------|--------------|
| 1  | -2.314535000  | 1.953915000  | 0.024925000  |
| 6  | -4.814446000  | -0.380790000 | 0.132319000  |
| 1  | -4.487947000  | -2.520159000 | 0.397202000  |
| 1  | -4.745262000  | 1.765017000  | -0.138603000 |
| 8  | 0.548918000   | -2.632847000 | 0.711724000  |
| 8  | -0.548924000  | 2.632860000  | 0.711613000  |
| 7  | -1.731562000  | -2.427751000 | 0.587254000  |
| 7  | 1.731559000   | 2.427763000  | 0.587167000  |
| 6  | 2.035298000   | 3.835973000  | 0.739602000  |
| 1  | 2.654165000   | 4.005943000  | 1.626891000  |
| 1  | 2.559846000   | 4.220158000  | -0.141900000 |
| 1  | 1.087661000   | 4.362111000  | 0.853943000  |
| 6  | -2.035306000  | -3.835952000 | 0.739768000  |
| 1  | -2.654161000  | -4.005872000 | 1.627075000  |
| 1  | -2.559868000  | -4.220181000 | -0.141707000 |
| 1  | -1.087670000  | -4.362087000 | 0.854123000  |
| 6  | 6.258892000   | 0.487113000  | 0.047851000  |
| 6  | 7.066446000   | 1.575219000  | 0.394677000  |
| 16 | 7.245790000   | -0.841174000 | -0.546134000 |
| 6  | 8.428708000   | 1.361257000  | 0.202589000  |
| 1  | 6.665875000   | 2.494880000  | 0.802709000  |
| 6  | 8.722753000   | 0.081420000  | -0.309501000 |
| 1  | 9.204403000   | 2.084075000  | 0.424871000  |
| 6  | -6.258891000  | -0.487109000 | 0.047870000  |
| 6  | -7.066447000  | -1.575201000 | 0.394737000  |
| 16 | -7.245788000  | 0.841159000  | -0.546159000 |
| 6  | -8.428709000  | -1.361243000 | 0.202645000  |
| 1  | -6.665878000  | -2.494849000 | 0.802800000  |
| 6  | -8.722753000  | -0.081424000 | -0.309490000 |
| 1  | -9.204405000  | -2.084051000 | 0.424954000  |
| 6  | -9.995330000  | 0.441401000  | -0.613953000 |
| 6  | 9.995332000   | -0.441412000 | -0.613949000 |
| 6  | -11.154145000 | -0.354619000 | -0.414396000 |
| 7  | -12.089564000 | -1.029772000 | -0.240663000 |
| 6  | -10.160815000 | 1.755403000  | -1.120971000 |
| 7  | -10.271780000 | 2.839998000  | -1.537314000 |
| 6  | 10.160818000  | -1.755432000 | -1.120919000 |
| 7  | 10.271785000  | -2.840044000 | -1.537219000 |
| 6  | 11.154145000  | 0.354617000  | -0.414421000 |
| 7  | 12.089563000  | 1.029778000  | -0.240713000 |

**S2IIDT-T1**

E=-2669.294862 Hartree

|   |              |             |              |
|---|--------------|-------------|--------------|
| 6 | -2.598492000 | 1.513527000 | -0.631880000 |
|---|--------------|-------------|--------------|

|    |              |              |              |
|----|--------------|--------------|--------------|
| 6  | -1.979625000 | 0.235711000  | -0.537785000 |
| 6  | -2.820119000 | -0.865593000 | -0.316034000 |
| 6  | -4.197331000 | -0.686568000 | -0.223047000 |
| 6  | -4.796466000 | 0.582956000  | -0.340685000 |
| 6  | -3.963571000 | 1.707205000  | -0.541889000 |
| 6  | -0.359978000 | 1.944280000  | -0.778209000 |
| 6  | -0.531370000 | 0.440682000  | -0.626616000 |
| 1  | -2.399065000 | -1.855619000 | -0.242454000 |
| 1  | -4.823815000 | -1.561752000 | -0.084190000 |
| 1  | -4.382559000 | 2.705182000  | -0.590188000 |
| 6  | 0.531373000  | -0.440674000 | -0.626642000 |
| 6  | 1.979629000  | -0.235704000 | -0.537828000 |
| 6  | 0.359982000  | -1.944264000 | -0.778306000 |
| 6  | 2.598495000  | -1.513521000 | -0.631923000 |
| 6  | 2.820124000  | 0.865598000  | -0.316067000 |
| 6  | 3.963573000  | -1.707201000 | -0.541920000 |
| 6  | 4.197335000  | 0.686571000  | -0.223076000 |
| 1  | 2.399069000  | 1.855623000  | -0.242479000 |
| 6  | 4.796468000  | -0.582953000 | -0.340713000 |
| 1  | 4.382559000  | -2.705179000 | -0.590216000 |
| 1  | 4.823819000  | 1.561754000  | -0.084211000 |
| 8  | -0.657228000 | -2.609369000 | -0.914425000 |
| 8  | 0.657225000  | 2.609376000  | -0.914412000 |
| 7  | 1.629218000  | -2.497310000 | -0.789897000 |
| 7  | -1.629216000 | 2.497317000  | -0.789854000 |
| 6  | -1.873589000 | 3.916444000  | -0.937911000 |
| 1  | -2.486621000 | 4.115399000  | -1.823471000 |
| 1  | -2.380976000 | 4.320747000  | -0.055101000 |
| 1  | -0.904604000 | 4.402378000  | -1.052294000 |
| 6  | 1.873587000  | -3.916441000 | -0.937917000 |
| 1  | 2.486644000  | -4.115416000 | -1.823455000 |
| 1  | 2.380946000  | -4.320730000 | -0.055084000 |
| 1  | 0.904603000  | -4.402372000 | -1.052319000 |
| 6  | -6.240611000 | 0.756417000  | -0.258090000 |
| 6  | -7.004825000 | 1.830482000  | -0.693030000 |
| 16 | -7.274765000 | -0.461702000 | 0.459673000  |
| 6  | -8.382338000 | 1.681343000  | -0.467423000 |
| 1  | -6.576699000 | 2.690684000  | -1.193439000 |
| 6  | -8.730829000 | 0.481705000  | 0.153928000  |
| 1  | -9.111106000 | 2.423916000  | -0.767178000 |
| 6  | 6.240613000  | -0.756417000 | -0.258110000 |
| 6  | 7.004827000  | -1.830483000 | -0.693046000 |
| 16 | 7.274764000  | 0.461700000  | 0.459659000  |
| 6  | 8.382339000  | -1.681347000 | -0.467431000 |

|   |               |              |              |
|---|---------------|--------------|--------------|
| 1 | 6.576703000   | -2.690684000 | -1.193458000 |
| 6 | 8.730828000   | -0.481709000 | 0.153921000  |
| 1 | 9.111108000   | -2.423921000 | -0.767183000 |
| 6 | -10.034962000 | 0.010192000  | 0.526681000  |
| 6 | -10.228522000 | -1.287440000 | 1.095413000  |
| 6 | -11.189980000 | 0.835732000  | 0.338488000  |
| 6 | -11.469312000 | -1.736798000 | 1.451011000  |
| 1 | -9.366903000  | -1.933163000 | 1.241743000  |
| 6 | -12.439006000 | 0.406247000  | 0.686763000  |
| 1 | -11.067846000 | 1.827599000  | -0.084058000 |
| 6 | -12.659909000 | -0.913758000 | 1.267970000  |
| 1 | -11.614593000 | -2.723054000 | 1.879877000  |
| 1 | -13.313799000 | 1.033110000  | 0.546337000  |
| 6 | 10.034960000  | -0.010198000 | 0.526681000  |
| 6 | 11.189979000  | -0.835739000 | 0.338493000  |
| 6 | 10.228520000  | 1.287435000  | 1.095414000  |
| 6 | 12.439003000  | -0.406256000 | 0.686775000  |
| 1 | 11.067845000  | -1.827605000 | -0.084055000 |
| 6 | 11.469308000  | 1.736791000  | 1.451017000  |
| 1 | 9.366901000   | 1.933159000  | 1.241738000  |
| 6 | 12.659905000  | 0.913747000  | 1.267988000  |
| 1 | 13.313796000  | -1.033119000 | 0.546351000  |
| 1 | 11.614589000  | 2.723047000  | 1.879882000  |
| 8 | -13.796932000 | -1.314142000 | 1.588664000  |
| 8 | 13.796927000  | 1.314133000  | 1.588679000  |

**S3IIDT-T1**

E=-3640.035719 Hartree

|   |              |              |              |
|---|--------------|--------------|--------------|
| 6 | -2.591948000 | -1.524791000 | 0.193864000  |
| 6 | -1.979420000 | -0.242959000 | 0.107784000  |
| 6 | -2.825658000 | 0.858056000  | -0.091240000 |
| 6 | -4.202786000 | 0.674435000  | -0.176267000 |
| 6 | -4.794638000 | -0.598641000 | -0.065694000 |
| 6 | -3.957946000 | -1.721729000 | 0.122169000  |
| 6 | -0.352958000 | -1.947365000 | 0.338047000  |
| 6 | -0.529523000 | -0.442661000 | 0.192087000  |
| 1 | -2.408414000 | 1.849238000  | -0.168588000 |
| 1 | -4.829392000 | 1.542716000  | -0.353152000 |
| 1 | -4.377609000 | -2.714426000 | 0.232222000  |
| 6 | 0.529523000  | 0.442621000  | 0.192091000  |
| 6 | 1.979422000  | 0.242925000  | 0.107801000  |
| 6 | 0.352952000  | 1.947324000  | 0.338058000  |
| 6 | 2.591942000  | 1.524762000  | 0.193849000  |
| 6 | 2.825666000  | -0.858090000 | -0.091203000 |

|    |               |              |              |
|----|---------------|--------------|--------------|
| 6  | 3.957938000   | 1.721708000  | 0.122141000  |
| 6  | 4.202794000   | -0.674462000 | -0.176236000 |
| 1  | 2.408428000   | -1.849275000 | -0.168531000 |
| 6  | 4.794638000   | 0.598621000  | -0.065696000 |
| 1  | 4.377596000   | 2.714410000  | 0.232166000  |
| 1  | 4.829404000   | -1.542742000 | -0.353104000 |
| 8  | -0.666696000  | 2.608897000  | 0.467468000  |
| 8  | 0.666682000   | -2.608937000 | 0.467522000  |
| 7  | 1.619956000   | 2.504719000  | 0.350719000  |
| 7  | -1.619967000  | -2.504749000 | 0.350760000  |
| 6  | -1.859389000  | -3.925838000 | 0.496042000  |
| 1  | -2.461726000  | -4.129755000 | 1.387593000  |
| 1  | -2.375035000  | -4.326728000 | -0.383306000 |
| 1  | -0.888280000  | -4.410076000 | 0.597878000  |
| 6  | 1.859369000   | 3.925815000  | 0.495953000  |
| 1  | 2.461720000   | 4.129764000  | 1.387486000  |
| 1  | 2.374998000   | 4.326681000  | -0.383416000 |
| 1  | 0.888259000   | 4.410049000  | 0.597789000  |
| 6  | -6.238688000  | -0.777180000 | -0.148086000 |
| 6  | -6.949114000  | -1.935827000 | -0.430619000 |
| 16 | -7.341275000  | 0.557023000  | 0.124795000  |
| 6  | -8.342882000  | -1.763656000 | -0.441742000 |
| 1  | -6.467298000  | -2.879184000 | -0.655937000 |
| 6  | -8.746507000  | -0.460684000 | -0.163591000 |
| 1  | -9.044425000  | -2.560956000 | -0.659418000 |
| 6  | 6.238686000   | 0.777167000  | -0.148099000 |
| 6  | 6.949103000   | 1.935811000  | -0.430666000 |
| 16 | 7.341284000   | -0.557021000 | 0.124814000  |
| 6  | 8.342872000   | 1.763650000  | -0.441791000 |
| 1  | 6.467279000   | 2.879158000  | -0.656009000 |
| 6  | 8.746507000   | 0.460688000  | -0.163607000 |
| 1  | 9.044408000   | 2.560949000  | -0.659493000 |
| 6  | -10.069758000 | 0.060618000  | -0.094713000 |
| 6  | -10.473862000 | 1.387096000  | 0.148426000  |
| 16 | -11.499613000 | -0.926329000 | -0.314821000 |
| 1  | -9.773938000  | 2.199372000  | 0.316810000  |
| 6  | -12.494854000 | 0.528331000  | -0.063148000 |
| 6  | 10.069762000  | -0.060604000 | -0.094721000 |
| 6  | 10.473876000  | -1.387072000 | 0.148449000  |
| 16 | 11.499609000  | 0.926348000  | -0.314860000 |
| 1  | 9.773958000   | -2.199349000 | 0.316855000  |
| 6  | 12.494861000  | -0.528299000 | -0.063154000 |
| 6  | 13.898905000  | -0.493398000 | -0.104275000 |
| 6  | -13.898898000 | 0.493439000  | -0.104262000 |



|   |               |              |              |
|---|---------------|--------------|--------------|
| 6 | 14.658636000  | -1.674780000 | 0.102856000  |
| 7 | 15.310362000  | -2.627025000 | 0.268729000  |
| 6 | 14.588816000  | 0.721071000  | -0.353172000 |
| 7 | 15.129492000  | 1.734147000  | -0.560015000 |
| 6 | -14.588819000 | -0.721032000 | -0.353126000 |
| 7 | -15.129503000 | -1.734109000 | -0.559940000 |
| 6 | -14.658621000 | 1.674832000  | 0.102843000  |
| 7 | -15.310339000 | 2.627085000  | 0.268695000  |
| 7 | -11.780794000 | 1.639533000  | 0.165461000  |
| 7 | 11.780810000  | -1.639500000 | 0.165484000  |

**S4IIDT-T1**

E=-3572.081846 Hartree

|   |              |              |              |
|---|--------------|--------------|--------------|
| 6 | -2.568420000 | 1.564162000  | -0.713018000 |
| 6 | -1.973239000 | 0.274623000  | -0.616798000 |
| 6 | -2.833675000 | -0.810085000 | -0.386549000 |
| 6 | -4.205956000 | -0.604937000 | -0.287279000 |
| 6 | -4.784143000 | 0.676274000  | -0.408817000 |
| 6 | -3.928387000 | 1.783843000  | -0.619781000 |
| 6 | -0.321963000 | 1.950077000  | -0.869133000 |
| 6 | -0.522696000 | 0.451380000  | -0.710823000 |
| 1 | -2.431102000 | -1.807655000 | -0.310519000 |
| 1 | -4.846519000 | -1.467866000 | -0.137429000 |
| 1 | -4.326180000 | 2.789978000  | -0.674434000 |
| 6 | 0.522692000  | -0.451411000 | -0.710782000 |
| 6 | 1.973240000  | -0.274637000 | -0.616814000 |
| 6 | 0.321962000  | -1.950119000 | -0.868955000 |
| 6 | 2.568425000  | -1.564177000 | -0.712979000 |
| 6 | 2.833673000  | 0.810081000  | -0.386595000 |
| 6 | 3.928395000  | -1.783850000 | -0.619743000 |
| 6 | 4.205953000  | 0.604942000  | -0.287314000 |
| 1 | 2.431105000  | 1.807655000  | -0.310602000 |
| 6 | 4.784146000  | -0.676270000 | -0.408818000 |
| 1 | 4.326194000  | -2.789984000 | -0.674361000 |
| 1 | 4.846514000  | 1.467877000  | -0.137487000 |
| 8 | -0.707963000 | -2.593803000 | -1.012475000 |
| 8 | 0.707958000  | 2.593731000  | -1.012816000 |
| 7 | 1.580321000  | -2.528065000 | -0.878625000 |
| 7 | -1.580314000 | 2.528037000  | -0.878730000 |
| 6 | -1.796976000 | 3.950864000  | -1.032380000 |
| 1 | -2.407327000 | 4.158442000  | -1.917890000 |
| 1 | -2.295008000 | 4.368768000  | -0.150524000 |
| 1 | -0.818727000 | 4.417107000  | -1.150134000 |
| 6 | 1.796979000  | -3.950916000 | -1.032053000 |
| 1 | 2.407308000  | -4.158634000 | -1.917544000 |

|    |               |              |              |
|----|---------------|--------------|--------------|
| 1  | 2.295033000   | -4.368681000 | -0.150143000 |
| 1  | 0.818728000   | -4.417179000 | -1.149709000 |
| 6  | -6.220925000  | 0.872278000  | -0.317564000 |
| 6  | -6.955142000  | 1.996564000  | -0.701101000 |
| 16 | -7.279043000  | -0.371965000 | 0.331543000  |
| 6  | -8.327196000  | 1.873555000  | -0.493412000 |
| 1  | -6.501666000  | 2.872937000  | -1.147839000 |
| 6  | -8.706037000  | 0.636664000  | 0.067875000  |
| 1  | -9.049218000  | 2.642122000  | -0.744402000 |
| 6  | 6.220930000   | -0.872265000 | -0.317571000 |
| 6  | 6.955152000   | -1.996540000 | -0.701130000 |
| 16 | 7.279041000   | 0.371975000  | 0.331550000  |
| 6  | 8.327206000   | -1.873527000 | -0.493438000 |
| 1  | 6.501679000   | -2.872905000 | -1.147885000 |
| 6  | 8.706040000   | -0.636644000 | 0.067873000  |
| 1  | 9.049233000   | -2.642086000 | -0.744441000 |
| 6  | -9.995764000  | 0.215226000  | 0.394604000  |
| 6  | -10.308221000 | -1.089495000 | 0.968913000  |
| 16 | -11.446353000 | 1.185631000  | 0.165169000  |
| 6  | -12.490028000 | -0.150419000 | 0.834096000  |
| 6  | 9.995764000   | -0.215208000 | 0.394615000  |
| 6  | 10.308213000  | 1.089499000  | 0.968961000  |
| 16 | 11.446356000  | -1.185608000 | 0.165179000  |
| 6  | 12.490031000  | 0.150461000  | 0.834068000  |
| 7  | -11.691148000 | -1.218906000 | 1.181091000  |
| 7  | 11.691141000  | 1.218923000  | 1.181117000  |
| 6  | -12.279261000 | -2.428448000 | 1.747089000  |
| 1  | -12.989459000 | -2.866708000 | 1.042371000  |
| 1  | -11.461633000 | -3.122344000 | 1.939384000  |
| 1  | -12.802141000 | -2.192974000 | 2.676724000  |
| 6  | 12.279247000  | 2.428455000  | 1.747146000  |
| 1  | 12.989421000  | 2.866752000  | 1.042427000  |
| 1  | 11.461612000  | 3.122329000  | 1.939486000  |
| 1  | 12.802153000  | 2.192956000  | 2.676760000  |
| 8  | -13.690513000 | -0.082322000 | 0.944889000  |
| 8  | -9.498099000  | -1.969486000 | 1.239273000  |
| 8  | 9.498086000   | 1.969484000  | 1.239330000  |
| 8  | 13.690512000  | 0.082352000  | 0.944898000  |

**S5IIDT-T1**

E=-3115.007089 Hartree

|   |              |              |              |
|---|--------------|--------------|--------------|
| 6 | -2.575563000 | 1.550969000  | -0.772187000 |
| 6 | -1.973853000 | 0.264111000  | -0.671852000 |
| 6 | -2.826132000 | -0.826234000 | -0.437788000 |
| 6 | -4.199428000 | -0.629628000 | -0.339324000 |

|    |              |              |              |
|----|--------------|--------------|--------------|
| 6  | -4.784427000 | 0.648462000  | -0.466204000 |
| 6  | -3.937054000 | 1.761657000  | -0.681323000 |
| 6  | -0.332022000 | 1.949651000  | -0.926893000 |
| 6  | -0.524439000 | 0.448802000  | -0.765946000 |
| 1  | -2.416967000 | -1.820779000 | -0.358368000 |
| 1  | -4.834796000 | -1.495552000 | -0.186209000 |
| 1  | -4.342069000 | 2.764560000  | -0.740135000 |
| 6  | 0.524441000  | -0.448824000 | -0.765932000 |
| 6  | 1.973856000  | -0.264131000 | -0.671844000 |
| 6  | 0.332025000  | -1.949678000 | -0.926834000 |
| 6  | 2.575565000  | -1.550992000 | -0.772131000 |
| 6  | 2.826135000  | 0.826222000  | -0.437814000 |
| 6  | 3.937056000  | -1.761678000 | -0.681255000 |
| 6  | 4.199430000  | 0.629618000  | -0.339339000 |
| 1  | 2.416970000  | 1.820770000  | -0.358429000 |
| 6  | 4.784428000  | -0.648476000 | -0.466173000 |
| 1  | 4.342070000  | -2.764583000 | -0.740029000 |
| 1  | 4.834799000  | 1.495547000  | -0.186252000 |
| 8  | -0.694815000 | -2.596825000 | -1.070194000 |
| 8  | 0.694816000  | 2.596791000  | -1.070295000 |
| 7  | 1.593543000  | -2.519793000 | -0.939847000 |
| 7  | -1.593541000 | 2.519764000  | -0.939936000 |
| 6  | -1.818869000 | 3.941757000  | -1.097271000 |
| 1  | -2.429371000 | 4.142668000  | -1.983964000 |
| 1  | -2.319712000 | 4.358004000  | -0.216462000 |
| 1  | -0.843655000 | 4.413979000  | -1.215430000 |
| 6  | 1.818870000  | -3.941793000 | -1.097117000 |
| 1  | 2.429376000  | -4.142746000 | -1.983798000 |
| 1  | 2.319708000  | -4.358001000 | -0.216287000 |
| 1  | 0.843655000  | -4.414020000 | -1.215259000 |
| 6  | -6.222357000 | 0.834118000  | -0.375958000 |
| 6  | -6.961973000 | 1.952423000  | -0.770638000 |
| 16 | -7.271628000 | -0.407962000 | 0.283880000  |
| 6  | -8.330351000 | 1.816318000  | -0.559093000 |
| 1  | -6.518601000 | 2.828899000  | -1.226919000 |
| 6  | -8.702573000 | 0.582840000  | 0.014994000  |
| 1  | -9.046443000 | 2.584520000  | -0.822846000 |
| 6  | 6.222358000  | -0.834130000 | -0.375914000 |
| 6  | 6.961975000  | -1.952448000 | -0.770556000 |
| 16 | 7.271626000  | 0.407968000  | 0.283893000  |
| 6  | 8.330353000  | -1.816338000 | -0.559009000 |
| 1  | 6.518605000  | -2.828938000 | -1.226812000 |
| 6  | 8.702573000  | -0.582841000 | 0.015040000  |
| 1  | 9.046446000  | -2.584547000 | -0.822736000 |

|   |               |              |              |
|---|---------------|--------------|--------------|
| 6 | 10.015658000  | -0.163625000 | 0.348739000  |
| 6 | 11.143602000  | -0.986798000 | 0.137753000  |
| 6 | 10.222328000  | 1.175967000  | 0.936290000  |
| 6 | 12.414475000  | -0.570320000 | 0.459253000  |
| 1 | 11.019741000  | -1.975980000 | -0.287714000 |
| 6 | 12.669799000  | 0.759821000  | 1.043032000  |
| 6 | -10.015659000 | 0.163634000  | 0.348703000  |
| 6 | -11.143603000 | 0.986802000  | 0.137689000  |
| 6 | -10.222331000 | -1.175939000 | 0.936295000  |
| 6 | -12.414476000 | 0.570334000  | 0.459201000  |
| 1 | -11.019740000 | 1.975971000  | -0.287806000 |
| 6 | -12.669803000 | -0.759789000 | 1.043019000  |
| 6 | 13.537940000  | -1.416108000 | 0.237894000  |
| 7 | 14.427981000  | -2.140439000 | 0.039991000  |
| 6 | -13.537940000 | 1.416117000  | 0.237816000  |
| 7 | -14.427980000 | 2.140444000  | 0.039893000  |
| 8 | 9.289198000   | 1.947922000  | 1.156023000  |
| 8 | -9.289200000  | -1.947884000 | 1.156063000  |
| 8 | -13.789586000 | -1.151920000 | 1.335620000  |
| 8 | 13.789584000  | 1.151965000  | 1.335614000  |
| 7 | 11.527040000  | 1.554669000  | 1.243359000  |
| 7 | -11.527043000 | -1.554630000 | 1.243374000  |
| 6 | -11.700306000 | -2.892105000 | 1.824166000  |
| 1 | -11.320089000 | -3.646395000 | 1.132556000  |
| 1 | -11.137290000 | -2.965041000 | 2.756681000  |
| 1 | -12.762373000 | -3.036623000 | 2.004403000  |
| 6 | 11.700302000  | 2.892164000  | 1.824102000  |
| 1 | 11.320096000  | 3.646431000  | 1.132460000  |
| 1 | 11.137274000  | 2.965137000  | 2.756608000  |
| 1 | 12.762367000  | 3.036684000  | 2.004346000  |

**S6IIDT-T1**

E=-3837.649015 Hartree

|   |              |              |             |
|---|--------------|--------------|-------------|
| 6 | -2.551985000 | -1.590043000 | 0.768022000 |
| 6 | -1.968994000 | -0.294105000 | 0.666460000 |
| 6 | -2.837205000 | 0.783441000  | 0.429445000 |
| 6 | -4.206598000 | 0.566248000  | 0.329465000 |
| 6 | -4.775115000 | -0.721042000 | 0.458716000 |
| 6 | -3.909233000 | -1.821300000 | 0.677311000 |
| 6 | -0.302453000 | -1.954297000 | 0.926087000 |
| 6 | -0.517494000 | -0.456988000 | 0.762269000 |
| 1 | -2.442483000 | 1.783664000  | 0.347915000 |
| 1 | -4.853596000 | 1.421983000  | 0.168897000 |
| 1 | -4.298324000 | -2.829748000 | 0.743681000 |
| 6 | 0.517497000  | 0.457088000  | 0.762268000 |

|    |               |              |              |
|----|---------------|--------------|--------------|
| 6  | 1.968994000   | 0.294188000  | 0.666460000  |
| 6  | 0.302474000   | 1.954400000  | 0.926089000  |
| 6  | 2.552000000   | 1.590121000  | 0.768003000  |
| 6  | 2.837190000   | -0.783372000 | 0.429461000  |
| 6  | 3.909250000   | 1.821360000  | 0.677284000  |
| 6  | 4.206586000   | -0.566197000 | 0.329474000  |
| 1  | 2.442455000   | -1.783591000 | 0.347945000  |
| 6  | 4.775118000   | 0.721088000  | 0.458703000  |
| 1  | 4.298353000   | 2.829804000  | 0.743640000  |
| 1  | 4.853574000   | -1.421943000 | 0.168918000  |
| 8  | -0.734236000  | 2.585268000  | 1.071756000  |
| 8  | 0.734265000   | -2.585152000 | 1.071752000  |
| 7  | 1.555119000   | 2.543392000  | 0.939065000  |
| 7  | -1.555093000  | -2.543302000 | 0.939088000  |
| 6  | -1.759322000  | -3.968045000 | 1.100204000  |
| 1  | -2.366890000  | -4.175580000 | 1.987379000  |
| 1  | -2.254183000  | -4.393805000 | 0.220567000  |
| 1  | -0.777200000  | -4.425445000 | 1.219467000  |
| 6  | 1.759364000   | 3.968135000  | 1.100158000  |
| 1  | 2.366943000   | 4.175678000  | 1.987324000  |
| 1  | 2.254221000   | 4.393878000  | 0.220510000  |
| 1  | 0.777249000   | 4.425547000  | 1.219425000  |
| 6  | -6.206382000  | -0.926033000 | 0.366791000  |
| 6  | -6.923988000  | -2.086214000 | 0.692106000  |
| 16 | -7.285998000  | 0.339607000  | -0.201197000 |
| 6  | -8.291413000  | -1.973331000 | 0.503284000  |
| 1  | -6.458273000  | -2.983527000 | 1.080954000  |
| 6  | -8.701053000  | -0.702672000 | 0.010772000  |
| 1  | -9.015164000  | -2.748149000 | 0.704463000  |
| 6  | 6.206388000   | 0.926061000  | 0.366770000  |
| 6  | 6.924008000   | 2.086242000  | 0.692055000  |
| 16 | 7.285988000   | -0.339606000 | -0.201189000 |
| 6  | 8.291431000   | 1.973338000  | 0.503234000  |
| 1  | 6.458304000   | 2.983571000  | 1.080880000  |
| 6  | 8.701056000   | 0.702661000  | 0.010755000  |
| 1  | 9.015191000   | 2.748153000  | 0.704392000  |
| 6  | 10.008175000  | 0.276390000  | -0.286737000 |
| 6  | 11.152954000  | 1.170859000  | -0.108228000 |
| 6  | 10.216234000  | -1.079081000 | -0.778913000 |
| 6  | 12.645607000  | -0.655474000 | -0.895981000 |
| 6  | -10.008177000 | -0.276426000 | -0.286732000 |
| 6  | -11.152944000 | -1.170906000 | -0.108199000 |
| 6  | -10.216256000 | 1.079029000  | -0.778944000 |
| 6  | -12.645624000 | 0.655387000  | -0.895992000 |

|    |               |              |              |
|----|---------------|--------------|--------------|
| 8  | 9.285328000   | -1.867043000 | -0.951544000 |
| 8  | -9.285362000  | 1.867000000  | -0.951597000 |
| 7  | 11.537298000  | -1.469904000 | -1.056842000 |
| 7  | -11.537327000 | 1.469826000  | -1.056881000 |
| 6  | -11.731410000 | 2.842621000  | -1.551559000 |
| 1  | -12.381381000 | 3.392195000  | -0.869449000 |
| 1  | -10.750102000 | 3.305025000  | -1.607188000 |
| 1  | -12.204915000 | 2.817161000  | -2.533835000 |
| 6  | 11.731361000  | -2.842715000 | -1.551483000 |
| 1  | 12.381332000  | -3.392277000 | -0.869363000 |
| 1  | 10.750048000  | -3.305109000 | -1.607091000 |
| 1  | 12.204859000  | -2.817289000 | -2.533764000 |
| 7  | 12.420038000  | 0.628578000  | -0.431576000 |
| 7  | -12.420037000 | -0.628650000 | -0.431553000 |
| 6  | 13.578155000  | 1.519977000  | -0.251980000 |
| 1  | 14.275318000  | 1.079610000  | 0.462104000  |
| 1  | 14.095569000  | 1.648762000  | -1.203578000 |
| 1  | 13.198494000  | 2.469408000  | 0.113406000  |
| 6  | -13.578141000 | -1.520059000 | -0.251925000 |
| 1  | -14.275306000 | -1.079681000 | 0.462149000  |
| 1  | -14.095559000 | -1.648877000 | -1.203517000 |
| 1  | -13.198466000 | -2.469475000 | 0.113484000  |
| 8  | -11.073501000 | -2.328062000 | 0.294615000  |
| 8  | 11.073528000  | 2.328027000  | 0.294551000  |
| 16 | 14.187215000  | -1.203473000 | -1.249577000 |
| 16 | -14.187241000 | 1.203357000  | -1.249594000 |

**S7IIDT-T1**

E=-3345.511097 Hartree

|   |              |              |              |
|---|--------------|--------------|--------------|
| 6 | -2.534746000 | 1.618305000  | -1.054749000 |
| 6 | -1.967694000 | 0.315190000  | -0.957325000 |
| 6 | -2.849642000 | -0.753615000 | -0.733891000 |
| 6 | -4.217877000 | -0.521478000 | -0.638728000 |
| 6 | -4.765940000 | 0.773096000  | -0.758930000 |
| 6 | -3.890299000 | 1.865290000  | -0.966717000 |
| 6 | -0.281409000 | 1.958444000  | -1.201991000 |
| 6 | -0.512852000 | 0.462173000  | -1.047527000 |
| 1 | -2.467863000 | -1.759463000 | -0.662128000 |
| 1 | -4.879155000 | -1.371312000 | -0.505119000 |
| 1 | -4.270335000 | 2.878282000  | -1.019871000 |
| 6 | 0.512853000  | -0.462002000 | -1.047596000 |
| 6 | 1.967694000  | -0.315034000 | -0.957352000 |
| 6 | 0.281411000  | -1.958249000 | -1.202297000 |
| 6 | 2.534747000  | -1.618131000 | -1.055000000 |
| 6 | 2.849640000  | 0.753734000  | -0.733731000 |

|    |              |              |              |
|----|--------------|--------------|--------------|
| 6  | 3.890301000  | -1.865129000 | -0.967008000 |
| 6  | 4.217875000  | 0.521582000  | -0.638602000 |
| 1  | 2.467860000  | 1.759569000  | -0.661797000 |
| 6  | 4.765939000  | -0.772971000 | -0.759027000 |
| 1  | 4.270338000  | -2.878112000 | -1.020339000 |
| 1  | 4.879152000  | 1.371394000  | -0.504846000 |
| 8  | -0.761778000 | -2.579828000 | -1.338992000 |
| 8  | 0.761784000  | 2.580050000  | -1.338538000 |
| 7  | 1.527506000  | -2.561185000 | -1.215929000 |
| 7  | -1.527502000 | 2.561386000  | -1.215507000 |
| 6  | -1.715243000 | 3.989286000  | -1.369573000 |
| 1  | -2.318297000 | 4.208098000  | -2.257074000 |
| 1  | -2.207265000 | 4.416066000  | -0.488842000 |
| 1  | -0.727757000 | 4.436161000  | -1.484264000 |
| 6  | 1.715250000  | -3.989056000 | -1.370259000 |
| 1  | 2.318301000  | -4.207703000 | -2.257802000 |
| 1  | 2.207276000  | -4.415995000 | -0.489608000 |
| 1  | 0.727765000  | -4.435913000 | -1.485027000 |
| 6  | -6.196349000 | 1.001026000  | -0.669400000 |
| 6  | -6.920332000 | 2.114709000  | -1.109266000 |
| 16 | -7.268037000 | -0.180605000 | 0.043823000  |
| 6  | -8.288536000 | 2.027800000  | -0.882284000 |
| 1  | -6.454562000 | 2.952452000  | -1.613535000 |
| 6  | -8.689840000 | 0.819611000  | -0.261065000 |
| 1  | -9.011992000 | 2.786738000  | -1.143528000 |
| 6  | 6.196348000  | -1.000914000 | -0.669534000 |
| 6  | 6.920334000  | -2.114521000 | -1.109590000 |
| 16 | 7.268035000  | 0.180597000  | 0.043890000  |
| 6  | 8.288538000  | -2.027648000 | -0.882594000 |
| 1  | 6.454566000  | -2.952179000 | -1.614003000 |
| 6  | 8.689840000  | -0.819564000 | -0.261169000 |
| 1  | 9.011995000  | -2.786541000 | -1.143967000 |
| 6  | 9.990743000  | -0.525981000 | 0.190025000  |
| 6  | 10.982733000 | -1.629911000 | 0.429150000  |
| 6  | 10.574654000 | 0.696962000  | 0.696472000  |
| 6  | 12.042013000 | -1.043854000 | 1.283666000  |
| 6  | 11.780822000 | 0.322922000  | 1.489835000  |
| 6  | 13.136850000 | -1.686937000 | 1.843224000  |
| 6  | 12.639126000 | 1.066260000  | 2.303452000  |
| 6  | 13.992759000 | -0.939186000 | 2.655705000  |
| 1  | 13.303658000 | -2.741070000 | 1.646504000  |
| 6  | 13.736565000 | 0.417295000  | 2.882650000  |
| 1  | 12.475480000 | 2.116558000  | 2.502379000  |
| 1  | 14.856420000 | -1.409059000 | 3.115808000  |

|   |               |              |              |
|---|---------------|--------------|--------------|
| 1 | 14.403353000  | 0.987012000  | 3.522621000  |
| 6 | -9.990744000  | 0.525952000  | 0.190079000  |
| 6 | -10.982732000 | 1.629843000  | 0.429395000  |
| 6 | -10.574655000 | -0.697076000 | 0.696319000  |
| 6 | -12.042015000 | 1.043639000  | 1.283805000  |
| 6 | -11.780825000 | -0.323172000 | 1.489742000  |
| 6 | -13.136855000 | 1.686627000  | 1.843469000  |
| 6 | -12.639131000 | -1.066649000 | 2.303229000  |
| 6 | -13.992766000 | 0.938737000  | 2.655820000  |
| 1 | -13.303662000 | 2.740793000  | 1.646928000  |
| 6 | -13.736572000 | -0.417782000 | 2.882534000  |
| 1 | -12.475485000 | -2.116981000 | 2.501979000  |
| 1 | -14.856429000 | 1.408531000  | 3.116000000  |
| 1 | -14.403362000 | -0.987609000 | 3.522407000  |
| 8 | -10.929345000 | 2.787838000  | 0.042128000  |
| 8 | 10.929343000  | -2.787841000 | 0.041693000  |
| 6 | -10.214421000 | -2.003480000 | 0.383341000  |
| 6 | 10.214422000  | 2.003419000  | 0.383715000  |
| 6 | -9.329210000  | -2.357574000 | -0.678774000 |
| 7 | -8.660547000  | -2.709998000 | -1.565657000 |
| 6 | -10.816674000 | -3.139433000 | 1.004892000  |
| 7 | -11.272344000 | -4.088387000 | 1.505153000  |
| 6 | 10.816674000  | 3.139266000  | 1.005461000  |
| 7 | 11.272342000  | 4.088135000  | 1.505884000  |
| 6 | 9.329216000   | 2.357694000  | -0.678342000 |
| 7 | 8.660556000   | 2.710270000  | -1.565169000 |

**S8IIDT-T1**

E=-4215.951598 Hartree

|   |              |              |              |
|---|--------------|--------------|--------------|
| 6 | 2.574251000  | -1.552964000 | -1.094750000 |
| 6 | 1.975237000  | -0.264567000 | -0.994393000 |
| 6 | 2.829493000  | 0.826130000  | -0.771107000 |
| 6 | 4.203745000  | 0.628690000  | -0.679404000 |
| 6 | 4.782321000  | -0.651250000 | -0.802752000 |
| 6 | 3.936284000  | -1.765405000 | -1.010060000 |
| 6 | 0.330484000  | -1.950545000 | -1.236180000 |
| 6 | 0.524022000  | -0.448219000 | -1.082362000 |
| 1 | 2.422241000  | 1.821743000  | -0.697266000 |
| 1 | 4.844229000  | 1.494662000  | -0.548076000 |
| 1 | 4.343148000  | -2.767991000 | -1.062670000 |
| 6 | -0.524175000 | 0.449569000  | -1.082175000 |
| 6 | -1.975350000 | 0.265720000  | -0.994119000 |
| 6 | -0.330841000 | 1.951965000  | -1.235630000 |
| 6 | -2.574545000 | 1.554058000  | -1.094062000 |
| 6 | -2.829419000 | -0.825172000 | -0.771087000 |



|    |               |              |              |
|----|---------------|--------------|--------------|
| 6  | -3.936601000  | 1.766281000  | -1.009179000 |
| 6  | -4.203689000  | -0.627954000 | -0.679188000 |
| 1  | -2.422006000  | -1.820750000 | -0.697597000 |
| 6  | -4.782456000  | 0.651943000  | -0.802100000 |
| 1  | -4.343616000  | 2.768822000  | -1.061478000 |
| 1  | -4.844039000  | -1.494056000 | -0.548059000 |
| 8  | 0.696476000   | 2.599802000  | -1.368465000 |
| 8  | -0.696959000  | -2.598210000 | -1.368886000 |
| 7  | -1.591887000  | 2.522498000  | -1.252924000 |
| 7  | 1.591451000   | -2.521240000 | -1.253736000 |
| 6  | 1.815664000   | -3.944376000 | -1.407088000 |
| 1  | 2.421726000   | -4.148006000 | -2.296043000 |
| 1  | 2.320721000   | -4.357136000 | -0.527181000 |
| 1  | 0.839850000   | -4.416773000 | -1.518891000 |
| 6  | -1.816304000  | 3.945637000  | -1.405947000 |
| 1  | -2.422480000  | 4.149381000  | -2.294799000 |
| 1  | -2.321328000  | 4.358140000  | -0.525901000 |
| 1  | -0.840563000  | 4.418188000  | -1.517743000 |
| 6  | 6.219807000   | -0.844424000 | -0.717075000 |
| 6  | 6.971776000   | -1.919869000 | -1.196354000 |
| 16 | 7.252833000   | 0.333858000  | 0.052340000  |
| 6  | 8.337862000   | -1.802798000 | -0.957464000 |
| 1  | 6.531359000   | -2.746230000 | -1.739972000 |
| 6  | 8.697433000   | -0.614056000 | -0.288779000 |
| 1  | 9.076892000   | -2.523458000 | -1.285484000 |
| 6  | -6.219963000  | 0.844887000  | -0.716228000 |
| 6  | -6.972131000  | 1.920361000  | -1.195129000 |
| 16 | -7.252746000  | -0.333762000 | 0.052949000  |
| 6  | -8.338179000  | 1.803026000  | -0.956144000 |
| 1  | -6.531884000  | 2.746938000  | -1.738558000 |
| 6  | -8.697511000  | 0.614048000  | -0.287754000 |
| 1  | -9.077344000  | 2.523667000  | -1.283900000 |
| 6  | -9.988602000  | 0.304921000  | 0.184291000  |
| 6  | -10.617092000 | -0.894737000 | 0.610252000  |
| 6  | -12.208986000 | 0.727188000  | 1.449860000  |
| 6  | -11.829662000 | -0.623913000 | 1.439406000  |
| 6  | -13.326512000 | 1.211622000  | 2.110728000  |
| 6  | -12.628224000 | -1.521533000 | 2.162859000  |
| 6  | -14.109448000 | 0.299313000  | 2.820378000  |
| 1  | -13.574931000 | 2.267170000  | 2.079494000  |
| 6  | -13.752160000 | -1.050692000 | 2.844968000  |
| 1  | -12.388044000 | -2.573619000 | 2.212723000  |
| 1  | -14.989275000 | 0.641367000  | 3.355501000  |
| 1  | -14.357030000 | -1.756429000 | 3.405320000  |

|    |               |              |              |
|----|---------------|--------------|--------------|
| 6  | 9.988610000   | -0.305281000 | 0.183264000  |
| 6  | 10.617368000  | 0.894143000  | 0.609504000  |
| 6  | 12.208909000  | -0.728330000 | 1.448723000  |
| 6  | 11.829863000  | 0.622850000  | 1.438612000  |
| 6  | 13.326327000  | -1.213166000 | 2.109480000  |
| 6  | 12.628606000  | 1.520121000  | 2.162298000  |
| 6  | 14.109443000  | -0.301200000 | 2.819373000  |
| 1  | 13.574528000  | -2.268757000 | 2.077977000  |
| 6  | 13.752435000  | 1.048873000  | 2.844301000  |
| 1  | 12.388646000  | 2.572245000  | 2.212421000  |
| 1  | 14.989192000  | -0.643573000 | 3.354418000  |
| 1  | 14.357447000  | 1.754342000  | 3.404838000  |
| 6  | 10.227681000  | 2.179389000  | 0.187442000  |
| 6  | -10.227068000 | -2.179783000 | 0.187897000  |
| 6  | 9.367917000   | 2.405725000  | -0.925667000 |
| 7  | 8.709321000   | 2.652313000  | -1.855721000 |
| 6  | 10.744661000  | 3.388886000  | 0.731690000  |
| 7  | 11.121066000  | 4.407838000  | 1.157313000  |
| 6  | -10.743720000 | -3.389552000 | 0.731852000  |
| 7  | -11.119847000 | -4.408719000 | 1.157208000  |
| 6  | -9.367078000  | -2.405612000 | -0.925140000 |
| 7  | -8.708237000  | -2.651757000 | -1.855137000 |
| 16 | 11.064763000  | -1.732002000 | 0.528410000  |
| 16 | -11.065034000 | 1.731337000  | 0.529826000  |
| 8  | 11.659928000  | -2.239820000 | -0.718490000 |
| 8  | 10.383946000  | -2.679632000 | 1.422194000  |
| 8  | -10.384405000 | 2.678856000  | 1.423870000  |
| 8  | -11.660294000 | 2.239378000  | -0.716937000 |

**S9IIDT-T1**

E=-4187.830708 Hartree

|   |              |              |             |
|---|--------------|--------------|-------------|
| 6 | 2.542429000  | 1.611163000  | 0.684764000 |
| 6 | 1.966905000  | 0.311298000  | 0.596302000 |
| 6 | 2.850841000  | -0.757062000 | 0.372220000 |
| 6 | 4.217638000  | -0.526237000 | 0.269310000 |
| 6 | 4.777570000  | 0.766019000  | 0.380281000 |
| 6 | 3.896512000  | 1.857106000  | 0.587002000 |
| 6 | 0.288236000  | 1.952644000  | 0.850206000 |
| 6 | 0.516349000  | 0.461732000  | 0.693398000 |
| 1 | 2.467199000  | -1.762731000 | 0.302164000 |
| 1 | 4.871598000  | -1.379222000 | 0.116991000 |
| 1 | 4.272448000  | 2.871493000  | 0.645192000 |
| 6 | -0.516351000 | -0.461799000 | 0.693387000 |
| 6 | -1.966906000 | -0.311355000 | 0.596303000 |
| 6 | -0.288246000 | -1.952717000 | 0.850157000 |

|    |               |              |              |
|----|---------------|--------------|--------------|
| 6  | -2.542436000  | -1.611222000 | 0.684700000  |
| 6  | -2.850837000  | 0.757019000  | 0.372266000  |
| 6  | -3.896519000  | -1.857154000 | 0.586918000  |
| 6  | -4.217633000  | 0.526205000  | 0.269340000  |
| 1  | -2.467188000  | 1.762689000  | 0.302255000  |
| 6  | -4.777572000  | -0.766054000 | 0.380246000  |
| 1  | -4.272458000  | -2.871543000 | 0.645062000  |
| 1  | -4.871588000  | 1.379200000  | 0.117052000  |
| 8  | 0.752175000   | -2.581616000 | 0.997702000  |
| 8  | -0.752185000  | 2.581527000  | 0.997821000  |
| 7  | -1.536257000  | -2.556492000 | 0.851361000  |
| 7  | 1.536246000   | 2.556421000  | 0.851468000  |
| 6  | 1.724626000   | 3.982068000  | 1.001728000  |
| 1  | 2.334935000   | 4.205034000  | 1.883963000  |
| 1  | 2.210815000   | 4.409950000  | 0.117579000  |
| 1  | 0.737144000   | 4.427961000  | 1.122926000  |
| 6  | -1.724642000  | -3.982147000 | 1.001533000  |
| 1  | -2.334964000  | -4.205163000 | 1.883747000  |
| 1  | -2.210819000  | -4.409977000 | 0.117353000  |
| 1  | -0.737163000  | -4.428049000 | 1.122720000  |
| 6  | 6.204436000   | 0.988380000  | 0.283697000  |
| 6  | 6.925122000   | 2.158762000  | 0.523002000  |
| 16 | 7.311541000   | -0.305360000 | -0.189669000 |
| 6  | 8.303393000   | 2.047321000  | 0.345973000  |
| 1  | 6.450050000   | 3.079244000  | 0.840710000  |
| 6  | 8.722295000   | 0.756758000  | -0.047296000 |
| 1  | 8.997774000   | 2.864746000  | 0.501858000  |
| 6  | -6.204438000  | -0.988403000 | 0.283643000  |
| 6  | -6.925128000  | -2.158807000 | 0.522840000  |
| 16 | -7.311543000  | 0.305386000  | -0.189590000 |
| 6  | -8.303396000  | -2.047349000 | 0.345813000  |
| 1  | -6.450057000  | -3.079321000 | 0.840457000  |
| 6  | -8.722296000  | -0.756750000 | -0.047342000 |
| 1  | -8.997778000  | -2.864789000 | 0.501612000  |
| 6  | -10.015494000 | -0.313254000 | -0.302903000 |
| 16 | -10.391272000 | 1.344537000  | -0.779299000 |
| 16 | -11.413714000 | -1.389940000 | -0.173978000 |
| 6  | -12.141745000 | 1.115299000  | -0.885445000 |
| 6  | -12.623004000 | -0.171931000 | -0.599693000 |
| 6  | -13.028190000 | 2.137367000  | -1.233400000 |
| 6  | -13.992673000 | -0.440200000 | -0.661231000 |
| 6  | -14.394116000 | 1.864596000  | -1.293634000 |
| 1  | -12.654873000 | 3.132423000  | -1.453731000 |
| 6  | -14.873551000 | 0.582999000  | -1.009123000 |

|    |               |              |              |
|----|---------------|--------------|--------------|
| 1  | -14.364780000 | -1.435499000 | -0.439859000 |
| 1  | -15.085336000 | 2.656505000  | -1.563498000 |
| 1  | -15.938053000 | 0.377371000  | -1.057541000 |
| 6  | 10.015496000  | 0.313283000  | -0.302882000 |
| 16 | 10.391276000  | -1.344464000 | -0.779427000 |
| 16 | 11.413715000  | 1.389955000  | -0.173841000 |
| 6  | 12.141753000  | -1.115223000 | -0.885516000 |
| 6  | 12.623011000  | 0.171981000  | -0.599639000 |
| 6  | 13.028202000  | -2.137262000 | -1.233545000 |
| 6  | 13.992681000  | 0.440251000  | -0.661125000 |
| 6  | 14.394130000  | -1.864490000 | -1.293727000 |
| 1  | 12.654885000  | -3.132297000 | -1.453973000 |
| 6  | 14.873563000  | -0.582920000 | -1.009092000 |
| 1  | 14.364787000  | 1.435528000  | -0.439656000 |
| 1  | 15.085353000  | -2.656377000 | -1.563648000 |
| 1  | 15.938066000  | -0.377292000 | -1.057470000 |

**S10IIDT-T1**

E=-3880.513512 Hartree

|   |              |              |              |
|---|--------------|--------------|--------------|
| 6 | -2.608702000 | -1.501773000 | 0.516845000  |
| 6 | -1.978341000 | -0.227523000 | 0.428902000  |
| 6 | -2.816459000 | 0.877386000  | 0.205638000  |
| 6 | -4.191808000 | 0.704721000  | 0.102884000  |
| 6 | -4.806217000 | -0.562624000 | 0.213201000  |
| 6 | -3.971970000 | -1.690062000 | 0.419155000  |
| 6 | -0.370994000 | -1.938474000 | 0.682620000  |
| 6 | -0.535613000 | -0.439398000 | 0.525983000  |
| 1 | -2.390572000 | 1.865943000  | 0.135971000  |
| 1 | -4.808948000 | 1.584789000  | -0.049179000 |
| 1 | -4.390531000 | -2.687628000 | 0.477410000  |
| 6 | 0.535613000  | 0.439555000  | 0.525862000  |
| 6 | 1.978340000  | 0.227650000  | 0.428833000  |
| 6 | 0.370999000  | 1.938675000  | 0.682089000  |
| 6 | 2.608707000  | 1.501919000  | 0.516447000  |
| 6 | 2.816453000  | -0.877321000 | 0.205856000  |
| 6 | 3.971976000  | 1.690177000  | 0.418713000  |
| 6 | 4.191803000  | -0.704690000 | 0.103059000  |
| 1 | 2.390562000  | -1.865894000 | 0.136448000  |
| 6 | 4.806218000  | 0.562681000  | 0.213051000  |
| 1 | 4.390542000  | 2.687755000  | 0.476708000  |
| 1 | 4.808940000  | -1.584800000 | -0.048772000 |
| 8 | -0.641699000 | 2.611470000  | 0.829695000  |
| 8 | 0.641710000  | -2.611229000 | 0.830375000  |
| 7 | 1.643517000  | 2.489099000  | 0.682616000  |
| 7 | -1.643508000 | -2.488906000 | 0.683269000  |

|    |               |              |              |
|----|---------------|--------------|--------------|
| 6  | -1.892127000  | -3.905225000 | 0.833421000  |
| 1  | -2.511332000  | -4.102291000 | 1.715652000  |
| 1  | -2.396077000  | -4.312113000 | -0.050714000 |
| 1  | -0.924392000  | -4.392533000 | 0.954546000  |
| 6  | 1.892143000   | 3.905455000  | 0.832414000  |
| 1  | 2.511342000   | 4.102738000  | 1.714601000  |
| 1  | 2.396102000   | 4.312118000  | -0.051818000 |
| 1  | 0.924409000   | 4.392799000  | 0.953410000  |
| 6  | -6.241239000  | -0.724377000 | 0.116956000  |
| 6  | -7.010915000  | -1.863510000 | 0.350976000  |
| 16 | -7.293734000  | 0.617358000  | -0.349282000 |
| 6  | -8.384069000  | -1.692456000 | 0.175469000  |
| 1  | -6.575501000  | -2.805240000 | 0.663262000  |
| 6  | -8.747480000  | -0.384448000 | -0.211054000 |
| 1  | -9.112402000  | -2.480637000 | 0.327537000  |
| 6  | 6.241240000   | 0.724403000  | 0.116767000  |
| 6  | 7.010924000   | 1.863584000  | 0.350526000  |
| 16 | 7.293727000   | -0.617446000 | -0.349163000 |
| 6  | 8.384077000   | 1.692481000  | 0.175059000  |
| 1  | 6.575516000   | 2.805387000  | 0.662598000  |
| 6  | 8.747480000   | 0.384382000  | -0.211163000 |
| 1  | 9.112415000   | 2.480692000  | 0.326948000  |
| 6  | 10.021430000  | -0.116849000 | -0.464106000 |
| 16 | 10.337995000  | -1.792870000 | -0.932889000 |
| 16 | 11.475662000  | 0.888954000  | -0.340316000 |
| 6  | 12.081108000  | -1.603200000 | -1.040323000 |
| 6  | 12.593329000  | -0.394966000 | -0.772854000 |
| 6  | -10.021433000 | 0.116716000  | -0.464113000 |
| 16 | -10.338009000 | 1.792626000  | -0.933286000 |
| 16 | -11.475659000 | -0.889067000 | -0.340089000 |
| 6  | -12.081120000 | 1.602920000  | -1.040677000 |
| 6  | -12.593334000 | 0.394746000  | -0.772927000 |
| 1  | -13.647214000 | 0.147423000  | -0.804081000 |
| 1  | -12.660173000 | 2.474404000  | -1.319713000 |
| 1  | 12.660156000  | -2.474752000 | -1.319157000 |
| 1  | 13.647211000  | -0.147657000 | -0.804065000 |

**S2FIIDT-CS** E=-2664.824588 Hartree

|   |              |              |             |
|---|--------------|--------------|-------------|
| 6 | 0.076910000  | -1.987950000 | 0.000183000 |
| 6 | -0.431471000 | -0.568943000 | 0.000032000 |
| 6 | -1.796992000 | -0.706594000 | 0.000035000 |
| 6 | -2.181469000 | -2.088584000 | 0.000020000 |

|    |              |              |              |
|----|--------------|--------------|--------------|
| 6  | -3.994901000 | -0.792416000 | -0.000009000 |
| 6  | -3.550647000 | -2.153141000 | -0.000030000 |
| 1  | -4.199472000 | -3.016328000 | -0.000063000 |
| 6  | 0.431471000  | 0.568933000  | -0.000045000 |
| 6  | -0.076913000 | 1.987939000  | -0.000151000 |
| 6  | 1.796992000  | 0.706586000  | -0.000064000 |
| 6  | 2.181466000  | 2.088577000  | -0.000079000 |
| 6  | 3.550644000  | 2.153137000  | -0.000073000 |
| 6  | 3.994901000  | 0.792413000  | -0.000055000 |
| 1  | 4.199468000  | 3.016325000  | -0.000074000 |
| 7  | -1.052052000 | -2.857333000 | 0.000013000  |
| 7  | 1.052047000  | 2.857324000  | -0.000083000 |
| 8  | 1.226257000  | -2.383839000 | -0.000014000 |
| 8  | -1.226261000 | 2.383825000  | 0.000014000  |
| 6  | -0.951460000 | -4.303056000 | -0.000030000 |
| 1  | -1.420933000 | -4.729364000 | -0.892494000 |
| 1  | 0.110930000  | -4.549940000 | -0.000134000 |
| 1  | -1.420759000 | -4.729414000 | 0.892504000  |
| 6  | 0.951453000  | 4.303047000  | 0.000029000  |
| 1  | 1.421017000  | 4.729450000  | -0.892340000 |
| 1  | -0.110937000 | 4.549928000  | -0.000161000 |
| 1  | 1.420659000  | 4.729310000  | 0.892657000  |
| 8  | -2.902130000 | 0.074040000  | -0.000005000 |
| 8  | 2.902132000  | -0.074045000 | -0.000046000 |
| 6  | 5.245252000  | 0.218205000  | -0.000040000 |
| 6  | 5.534343000  | -1.177974000 | -0.000029000 |
| 16 | 6.743307000  | 1.154335000  | -0.000052000 |
| 6  | 6.871292000  | -1.465006000 | -0.000003000 |
| 1  | 4.739958000  | -1.914561000 | -0.000028000 |
| 6  | 7.734403000  | -0.322321000 | 0.000004000  |
| 1  | 7.258115000  | -2.475718000 | 0.000019000  |
| 6  | -5.245251000 | -0.218205000 | -0.000026000 |
| 6  | -5.534339000 | 1.177974000  | -0.000038000 |
| 16 | -6.743308000 | -1.154333000 | -0.000078000 |
| 6  | -6.871288000 | 1.465009000  | -0.000030000 |
| 1  | -4.739953000 | 1.914559000  | -0.000030000 |
| 6  | -7.734401000 | 0.322325000  | -0.000022000 |
| 1  | -7.258109000 | 2.475722000  | -0.000014000 |
| 6  | 9.128363000  | -0.290942000 | 0.000037000  |
| 6  | 9.862416000  | 0.953218000  | 0.000020000  |
| 6  | 9.903948000  | -1.512174000 | 0.000063000  |
| 6  | 11.217902000 | 0.987504000  | 0.000054000  |
| 1  | 9.305109000  | 1.886946000  | -0.000024000 |
| 6  | 11.260125000 | -1.497263000 | 0.000097000  |

|   |               |              |              |
|---|---------------|--------------|--------------|
| 1 | 9.383597000   | -2.464521000 | 0.000051000  |
| 6 | 12.024264000  | -0.242377000 | 0.000153000  |
| 1 | 11.763155000  | 1.925984000  | 0.000029000  |
| 1 | 11.836975000  | -2.416681000 | 0.000102000  |
| 6 | -9.128361000  | 0.290949000  | 0.000005000  |
| 6 | -9.862416000  | -0.953210000 | 0.000005000  |
| 6 | -9.903943000  | 1.512182000  | 0.000053000  |
| 6 | -11.217902000 | -0.987493000 | 0.000029000  |
| 1 | -9.305111000  | -1.886939000 | -0.000013000 |
| 6 | -11.260121000 | 1.497274000  | 0.000075000  |
| 1 | -9.383591000  | 2.464529000  | 0.000073000  |
| 6 | -12.024262000 | 0.242390000  | 0.000013000  |
| 1 | -11.763157000 | -1.925973000 | 0.000041000  |
| 1 | -11.836969000 | 2.416692000  | 0.000122000  |
| 8 | 13.259957000  | -0.219544000 | 0.000074000  |
| 8 | -13.259955000 | 0.219558000  | 0.000133000  |

**S3FIIDT-CS** E=-3635.563838 Hartree

|   |              |              |              |
|---|--------------|--------------|--------------|
| 6 | 0.196108000  | -1.981282000 | 0.000145000  |
| 6 | -0.396425000 | -0.592170000 | 0.000088000  |
| 6 | -1.750805000 | -0.811727000 | 0.000096000  |
| 6 | -2.050565000 | -2.214176000 | 0.000137000  |
| 6 | -3.936663000 | -1.029096000 | 0.000099000  |
| 6 | -3.415285000 | -2.359849000 | 0.000139000  |
| 1 | -4.011447000 | -3.260210000 | 0.000167000  |
| 6 | 0.396425000  | 0.592170000  | 0.000043000  |
| 6 | -0.196108000 | 1.981281000  | -0.000014000 |
| 6 | 1.750804000  | 0.811726000  | 0.000033000  |
| 6 | 2.050565000  | 2.214175000  | -0.000012000 |
| 6 | 3.415285000  | 2.359849000  | -0.000014000 |
| 6 | 3.936663000  | 1.029096000  | 0.000027000  |
| 1 | 4.011447000  | 3.260210000  | -0.000039000 |
| 7 | -0.879459000 | -2.915436000 | 0.000150000  |
| 7 | 0.879459000  | 2.915435000  | -0.000039000 |
| 8 | 1.366585000  | -2.304087000 | 0.000136000  |
| 8 | -1.366585000 | 2.304086000  | -0.000001000 |
| 6 | -0.694532000 | -4.354517000 | 0.000214000  |
| 1 | -1.138573000 | -4.805735000 | -0.892549000 |
| 1 | 0.380115000  | -4.539843000 | 0.000095000  |
| 1 | -1.138353000 | -4.805639000 | 0.893138000  |
| 6 | 0.694532000  | 4.354517000  | -0.000044000 |
| 1 | 1.138583000  | 4.805692000  | -0.892824000 |
| 1 | -0.380115000 | 4.539843000  | -0.000185000 |

|    |               |              |              |
|----|---------------|--------------|--------------|
| 1  | 1.138342000   | 4.805681000  | 0.892863000  |
| 8  | -2.901070000  | -0.099123000 | 0.000071000  |
| 8  | 2.901070000   | 0.099123000  | 0.000057000  |
| 6  | 5.221063000   | 0.526273000  | 0.000045000  |
| 6  | 5.588111000   | -0.848115000 | 0.000092000  |
| 16 | 6.659605000   | 1.552695000  | 0.000017000  |
| 6  | 6.942560000   | -1.058335000 | 0.000098000  |
| 1  | 4.837510000   | -1.629200000 | 0.000119000  |
| 6  | 7.724373000   | 0.134523000  | 0.000048000  |
| 1  | 7.402833000   | -2.039384000 | 0.000132000  |
| 6  | -5.221063000  | -0.526273000 | 0.000083000  |
| 6  | -5.588111000  | 0.848115000  | 0.000046000  |
| 16 | -6.659605000  | -1.552695000 | 0.000116000  |
| 6  | -6.942560000  | 1.058335000  | 0.000034000  |
| 1  | -4.837509000  | 1.629200000  | 0.000027000  |
| 6  | -7.724373000  | -0.134523000 | 0.000056000  |
| 1  | -7.402832000  | 2.039384000  | 0.000005000  |
| 6  | -9.107482000  | -0.239750000 | 0.000046000  |
| 6  | -9.894786000  | -1.429407000 | 0.000101000  |
| 16 | -10.211677000 | 1.141926000  | 0.000012000  |
| 1  | -9.451681000  | -2.422057000 | 0.000142000  |
| 6  | -11.580184000 | -0.001752000 | -0.000080000 |
| 6  | 9.107482000   | 0.239750000  | 0.000036000  |
| 6  | 9.894786000   | 1.429407000  | 0.000024000  |
| 16 | 10.211677000  | -1.141926000 | 0.000096000  |
| 1  | 9.451681000   | 2.422057000  | 0.000002000  |
| 6  | 11.580184000  | 0.001752000  | -0.000082000 |
| 6  | -12.903909000 | 0.411777000  | -0.000196000 |
| 6  | 12.903909000  | -0.411776000 | -0.000185000 |
| 6  | -13.966156000 | -0.536155000 | -0.000252000 |
| 7  | -14.857875000 | -1.285549000 | -0.000290000 |
| 6  | -13.227838000 | 1.796511000  | -0.000250000 |
| 7  | -13.458521000 | 2.939426000  | -0.000325000 |
| 6  | 13.227838000  | -1.796510000 | -0.000153000 |
| 7  | 13.458521000  | -2.939426000 | -0.000170000 |
| 6  | 13.966156000  | 0.536155000  | -0.000311000 |
| 7  | 14.857875000  | 1.285549000  | -0.000403000 |
| 7  | -11.200598000 | -1.309587000 | 0.000014000  |
| 7  | 11.200598000  | 1.309587000  | -0.000063000 |

**S2FIIDT-OS** E=-2664.824819 Hartree

|   |              |             |             |
|---|--------------|-------------|-------------|
| 6 | -0.075789000 | 1.986755000 | 0.000208000 |
| 6 | 0.430771000  | 0.565994000 | 0.000193000 |



|    |               |              |              |
|----|---------------|--------------|--------------|
| 6  | 1.801048000   | 0.703945000  | 0.000174000  |
| 6  | 2.182732000   | 2.080400000  | 0.000183000  |
| 6  | 3.996922000   | 0.788571000  | 0.000115000  |
| 6  | 3.556737000   | 2.144693000  | 0.000167000  |
| 1  | 4.205580000   | 3.007850000  | 0.000181000  |
| 6  | -0.430772000  | -0.566005000 | 0.000196000  |
| 6  | 0.075786000   | -1.986767000 | 0.000227000  |
| 6  | -1.801049000  | -0.703953000 | 0.000174000  |
| 6  | -2.182735000  | -2.080407000 | 0.000181000  |
| 6  | -3.556740000  | -2.144697000 | 0.000152000  |
| 6  | -3.996922000  | -0.788574000 | 0.000097000  |
| 1  | -4.205585000  | -3.007852000 | 0.000158000  |
| 7  | 1.053653000   | 2.852857000  | 0.000185000  |
| 7  | -1.053659000  | -2.852867000 | 0.000190000  |
| 8  | -1.225552000  | 2.382945000  | 0.000243000  |
| 8  | 1.225547000   | -2.382961000 | 0.000257000  |
| 6  | 0.956638000   | 4.298631000  | 0.000297000  |
| 1  | 1.427192000   | 4.724202000  | -0.892017000 |
| 1  | -0.105149000  | 4.548104000  | 0.000068000  |
| 1  | 1.426765000   | 4.724062000  | 0.892905000  |
| 6  | -0.956646000  | -4.298640000 | 0.000297000  |
| 1  | -1.427194000  | -4.724208000 | -0.892023000 |
| 1  | 0.105140000   | -4.548116000 | 0.000077000  |
| 1  | -1.426783000  | -4.724074000 | 0.892899000  |
| 8  | 2.907344000   | -0.076744000 | 0.000138000  |
| 8  | -2.907343000  | 0.076739000  | 0.000129000  |
| 6  | -5.253052000  | -0.207755000 | 0.000040000  |
| 6  | -5.539775000  | 1.182525000  | 0.000010000  |
| 16 | -6.747641000  | -1.143871000 | 0.000015000  |
| 6  | -6.882754000  | 1.469211000  | -0.000066000 |
| 1  | -4.746512000  | 1.920239000  | 0.000033000  |
| 6  | -7.739210000  | 0.329601000  | -0.000086000 |
| 1  | -7.270034000  | 2.479797000  | -0.000111000 |
| 6  | 5.253053000   | 0.207755000  | 0.000075000  |
| 6  | 5.539779000   | -1.182525000 | 0.000077000  |
| 16 | 6.747641000   | 1.143874000  | 0.000062000  |
| 6  | 6.882759000   | -1.469209000 | -0.000005000 |
| 1  | 4.746517000   | -1.920240000 | 0.000114000  |
| 6  | 7.739213000   | -0.329597000 | -0.000056000 |
| 1  | 7.270040000   | -2.479793000 | -0.000040000 |
| 6  | -9.140287000  | 0.292645000  | -0.000165000 |
| 6  | -9.867355000  | -0.952375000 | -0.000161000 |
| 6  | -9.917210000  | 1.509764000  | -0.000258000 |
| 6  | -11.224696000 | -0.991558000 | -0.000239000 |

|   |               |              |              |
|---|---------------|--------------|--------------|
| 1 | -9.307319000  | -1.884367000 | -0.000090000 |
| 6 | -11.275145000 | 1.490554000  | -0.000337000 |
| 1 | -9.400016000  | 2.463778000  | -0.000265000 |
| 6 | -12.033214000 | 0.234271000  | -0.000336000 |
| 1 | -11.766324000 | -1.932110000 | -0.000232000 |
| 1 | -11.854753000 | 2.408219000  | -0.000404000 |
| 6 | 9.140290000   | -0.292638000 | -0.000164000 |
| 6 | 9.867356000   | 0.952383000  | -0.000175000 |
| 6 | 9.917215000   | -1.509756000 | -0.000273000 |
| 6 | 11.224697000  | 0.991569000  | -0.000281000 |
| 1 | 9.307318000   | 1.884374000  | -0.000092000 |
| 6 | 11.275150000  | -1.490544000 | -0.000378000 |
| 1 | 9.400022000   | -2.463770000 | -0.000270000 |
| 6 | 12.033217000  | -0.234259000 | -0.000387000 |
| 1 | 11.766323000  | 1.932121000  | -0.000287000 |
| 1 | 11.854759000  | -2.408208000 | -0.000460000 |
| 8 | -13.270904000 | 0.207446000  | -0.000399000 |
| 8 | 13.270907000  | -0.207432000 | -0.000490000 |

**S3FIIDT-OS** E=-3635.564374 Hartree

|   |              |              |              |
|---|--------------|--------------|--------------|
| 6 | 0.193433000  | -1.980119000 | -0.000001000 |
| 6 | -0.395937000 | -0.587463000 | -0.000033000 |
| 6 | -1.757432000 | -0.807229000 | -0.000040000 |
| 6 | -2.054175000 | -2.201155000 | -0.000005000 |
| 6 | -3.940435000 | -1.021692000 | -0.000052000 |
| 6 | -3.425505000 | -2.346785000 | -0.000010000 |
| 1 | -4.020922000 | -3.247628000 | 0.000011000  |
| 6 | 0.395937000  | 0.587464000  | -0.000060000 |
| 6 | -0.193433000 | 1.980119000  | -0.000079000 |
| 6 | 1.757432000  | 0.807230000  | -0.000068000 |
| 6 | 2.054175000  | 2.201155000  | -0.000106000 |
| 6 | 3.425505000  | 2.346786000  | -0.000114000 |
| 6 | 3.940435000  | 1.021693000  | -0.000082000 |
| 1 | 4.020922000  | 3.247629000  | -0.000135000 |
| 7 | -0.883201000 | -2.908523000 | 0.000011000  |
| 7 | 0.883200000  | 2.908524000  | -0.000136000 |
| 8 | 1.364532000  | -2.303542000 | 0.000048000  |
| 8 | -1.364532000 | 2.303543000  | -0.000093000 |
| 6 | -0.704640000 | -4.348096000 | 0.000130000  |
| 1 | -1.150616000 | -4.797933000 | -0.892478000 |
| 1 | 0.369189000  | -4.538236000 | -0.000127000 |
| 1 | -1.150148000 | -4.797756000 | 0.893064000  |
| 6 | 0.704639000  | 4.348097000  | -0.000110000 |

|    |               |              |              |
|----|---------------|--------------|--------------|
| 1  | 1.150614000   | 4.797876000  | -0.892748000 |
| 1  | -0.369189000  | 4.538237000  | -0.000377000 |
| 1  | 1.150150000   | 4.797814000  | 0.892794000  |
| 8  | -2.909079000  | -0.093878000 | -0.000070000 |
| 8  | 2.909080000   | 0.093879000  | -0.000057000 |
| 6  | 5.233324000   | 0.510276000  | -0.000063000 |
| 6  | 5.596834000   | -0.856341000 | -0.000007000 |
| 16 | 6.666867000   | 1.536325000  | -0.000098000 |
| 6  | 6.959545000   | -1.065498000 | -0.000001000 |
| 1  | 4.848511000   | -1.639459000 | 0.000019000  |
| 6  | 7.732554000   | 0.122522000  | -0.000046000 |
| 1  | 7.419212000   | -2.046904000 | 0.000036000  |
| 6  | -5.233323000  | -0.510275000 | -0.000086000 |
| 6  | -5.596834000  | 0.856342000  | -0.000163000 |
| 16 | -6.666867000  | -1.536324000 | -0.000063000 |
| 6  | -6.959545000  | 1.065499000  | -0.000165000 |
| 1  | -4.848511000  | 1.639460000  | -0.000202000 |
| 6  | -7.732554000  | -0.122522000 | -0.000086000 |
| 1  | -7.419213000  | 2.046904000  | -0.000212000 |
| 6  | -9.124270000  | -0.239270000 | -0.000049000 |
| 6  | -9.902400000  | -1.428073000 | -0.000017000 |
| 16 | -10.228621000 | 1.136855000  | -0.000078000 |
| 1  | -9.458049000  | -2.419732000 | -0.000012000 |
| 6  | -11.594075000 | -0.009091000 | 0.000081000  |
| 6  | 9.124270000   | 0.239270000  | -0.000058000 |
| 6  | 9.902401000   | 1.428072000  | -0.000154000 |
| 16 | 10.228620000  | -1.136855000 | -0.000009000 |
| 1  | 9.458050000   | 2.419732000  | -0.000216000 |
| 6  | 11.594075000  | 0.009090000  | 0.000036000  |
| 6  | -12.922392000 | 0.406389000  | 0.000181000  |
| 6  | 12.922392000  | -0.406391000 | 0.000156000  |
| 6  | -13.982904000 | -0.541855000 | 0.000298000  |
| 7  | -14.873720000 | -1.292762000 | 0.000390000  |
| 6  | -13.247285000 | 1.789887000  | 0.000167000  |
| 7  | -13.480095000 | 2.932640000  | 0.000178000  |
| 6  | 13.247284000  | -1.789889000 | 0.000253000  |
| 7  | 13.480093000  | -2.932642000 | 0.000354000  |
| 6  | 13.982904000  | 0.541853000  | 0.000187000  |
| 7  | 14.873721000  | 1.292759000  | 0.000206000  |
| 7  | -11.213914000 | -1.310613000 | 0.000068000  |
| 7  | 11.213915000  | 1.310613000  | -0.000085000 |

S2FIIDT-T1

E=-2664.815459 Hartree

|    |              |              |              |
|----|--------------|--------------|--------------|
| 6  | 0.070158000  | -1.984134000 | 0.000395000  |
| 6  | -0.426263000 | -0.545050000 | -0.000032000 |
| 6  | -1.827012000 | -0.685468000 | 0.000012000  |
| 6  | -2.191102000 | -2.030899000 | -0.000037000 |
| 6  | -4.011223000 | -0.763238000 | -0.000094000 |
| 6  | -3.589197000 | -2.099071000 | -0.000166000 |
| 1  | -4.233521000 | -2.965416000 | -0.000277000 |
| 6  | 0.426262000  | 0.545041000  | -0.000246000 |
| 6  | -0.070161000 | 1.984124000  | -0.000615000 |
| 6  | 1.827012000  | 0.685462000  | -0.000276000 |
| 6  | 2.191100000  | 2.030892000  | -0.000341000 |
| 6  | 3.589195000  | 2.099067000  | -0.000274000 |
| 6  | 4.011222000  | 0.763236000  | -0.000204000 |
| 1  | 4.233518000  | 2.965413000  | -0.000270000 |
| 7  | -1.060305000 | -2.826073000 | -0.000084000 |
| 7  | 1.060301000  | 2.826065000  | -0.000384000 |
| 8  | 1.221735000  | -2.377927000 | -0.000275000 |
| 8  | -1.221739000 | 2.377915000  | -0.000194000 |
| 6  | -0.988883000 | -4.272576000 | -0.000376000 |
| 1  | -1.466551000 | -4.690980000 | -0.892695000 |
| 1  | 0.068075000  | -4.541931000 | -0.000358000 |
| 1  | -1.466657000 | -4.691333000 | 0.891721000  |
| 6  | 0.988877000  | 4.272568000  | -0.000210000 |
| 1  | 1.466827000  | 4.691251000  | -0.892246000 |
| 1  | -0.068081000 | 4.541921000  | -0.000452000 |
| 1  | 1.466368000  | 4.691047000  | 0.892170000  |
| 8  | -2.938903000 | 0.096588000  | -0.000080000 |
| 8  | 2.938904000  | -0.096593000 | -0.000167000 |
| 6  | 5.294672000  | 0.154551000  | -0.000124000 |
| 6  | 5.574197000  | -1.211167000 | -0.000052000 |
| 16 | 6.771761000  | 1.094473000  | -0.000139000 |
| 6  | 6.942957000  | -1.494297000 | 0.000056000  |
| 1  | 4.788400000  | -1.956503000 | -0.000061000 |
| 6  | 7.770183000  | -0.364238000 | 0.000077000  |
| 1  | 7.333014000  | -2.504134000 | 0.000141000  |
| 6  | -5.294671000 | -0.154553000 | -0.000122000 |
| 6  | -5.574194000 | 1.211166000  | -0.000125000 |
| 16 | -6.771762000 | -1.094472000 | -0.000250000 |
| 6  | -6.942952000 | 1.494299000  | -0.000061000 |
| 1  | -4.788396000 | 1.956501000  | -0.000125000 |
| 6  | -7.770182000 | 0.364241000  | -0.000090000 |
| 1  | -7.333008000 | 2.504136000  | -0.000030000 |
| 6  | 9.198854000  | -0.299332000 | 0.000212000  |
| 6  | 9.894777000  | 0.951467000  | 0.000172000  |

|   |               |              |             |
|---|---------------|--------------|-------------|
| 6 | 9.984989000   | -1.498250000 | 0.000337000 |
| 6 | 11.258920000  | 1.014261000  | 0.000302000 |
| 1 | 9.320904000   | 1.874560000  | 0.000026000 |
| 6 | 11.349390000  | -1.457670000 | 0.000468000 |
| 1 | 9.482544000   | -2.459933000 | 0.000317000 |
| 6 | 12.079719000  | -0.193362000 | 0.000571000 |
| 1 | 11.783438000  | 1.964356000  | 0.000247000 |
| 1 | 11.942881000  | -2.366357000 | 0.000536000 |
| 6 | -9.198851000  | 0.299338000  | 0.000144000 |
| 6 | -9.894777000  | -0.951459000 | 0.000165000 |
| 6 | -9.984984000  | 1.498258000  | 0.000314000 |
| 6 | -11.258921000 | -1.014251000 | 0.000306000 |
| 1 | -9.320906000  | -1.874554000 | 0.000070000 |
| 6 | -11.349385000 | 1.457681000  | 0.000456000 |
| 1 | -9.482537000  | 2.459940000  | 0.000336000 |
| 6 | -12.079717000 | 0.193374000  | 0.000371000 |
| 1 | -11.783441000 | -1.964344000 | 0.000342000 |
| 1 | -11.942874000 | 2.366369000  | 0.000605000 |
| 8 | 13.324999000  | -0.146940000 | 0.000483000 |
| 8 | -13.324997000 | 0.146955000  | 0.000670000 |

**S3FIIDT-T1** E=-3635.556902 Hartree

|   |              |              |              |
|---|--------------|--------------|--------------|
| 6 | 0.188715000  | -1.978045000 | 0.000813000  |
| 6 | -0.392822000 | -0.570007000 | 0.000246000  |
| 6 | -1.780301000 | -0.792843000 | 0.000343000  |
| 6 | -2.064137000 | -2.160017000 | 0.000375000  |
| 6 | -3.954385000 | -0.999949000 | 0.000278000  |
| 6 | -3.454822000 | -2.309562000 | 0.000280000  |
| 1 | -4.046477000 | -3.212769000 | 0.000228000  |
| 6 | 0.392822000  | 0.570007000  | -0.000094000 |
| 6 | -0.188715000 | 1.978045000  | -0.000644000 |
| 6 | 1.780301000  | 0.792843000  | -0.000185000 |
| 6 | 2.064137000  | 2.160017000  | -0.000263000 |
| 6 | 3.454822000  | 2.309562000  | -0.000184000 |
| 6 | 3.954385000  | 0.999949000  | -0.000135000 |
| 1 | 4.046477000  | 3.212769000  | -0.000166000 |
| 7 | -0.890019000 | -2.886192000 | 0.000334000  |
| 7 | 0.890018000  | 2.886192000  | -0.000269000 |
| 8 | 1.361336000  | -2.300058000 | -0.000003000 |
| 8 | -1.361336000 | 2.300058000  | 0.000081000  |
| 6 | -0.732885000 | -4.327248000 | 0.000049000  |
| 1 | -1.184982000 | -4.771753000 | -0.892565000 |
| 1 | 0.337935000  | -4.534011000 | 0.000062000  |

|    |               |              |              |
|----|---------------|--------------|--------------|
| 1  | -1.185057000  | -4.772099000 | 0.892453000  |
| 6  | 0.732885000   | 4.327248000  | 0.000016000  |
| 1  | 1.185293000   | 4.772110000  | -0.892261000 |
| 1  | -0.337935000  | 4.534011000  | -0.000272000 |
| 1  | 1.184746000   | 4.771742000  | 0.892756000  |
| 8  | -2.935223000  | -0.078003000 | 0.000229000  |
| 8  | 2.935223000   | 0.078003000  | -0.000060000 |
| 6  | 5.269841000   | 0.466001000  | -0.000069000 |
| 6  | 5.624714000   | -0.882505000 | 0.000025000  |
| 16 | 6.690078000   | 1.491801000  | -0.000082000 |
| 6  | 7.007674000   | -1.089072000 | 0.000066000  |
| 1  | 4.881579000   | -1.670158000 | 0.000058000  |
| 6  | 7.759556000   | 0.088677000  | 0.000003000  |
| 1  | 7.466723000   | -2.070958000 | 0.000135000  |
| 6  | -5.269841000  | -0.466001000 | 0.000227000  |
| 6  | -5.624714000  | 0.882505000  | 0.000187000  |
| 16 | -6.690079000  | -1.491801000 | 0.000211000  |
| 6  | -7.007674000  | 1.089072000  | 0.000138000  |
| 1  | -4.881579000  | 1.670158000  | 0.000195000  |
| 6  | -7.759556000  | -0.088677000 | 0.000130000  |
| 1  | -7.466723000  | 2.070958000  | 0.000103000  |
| 6  | -9.170853000  | -0.235209000 | 0.000078000  |
| 6  | -9.925824000  | -1.424474000 | 0.000093000  |
| 16 | -10.277729000 | 1.125458000  | 0.000030000  |
| 1  | -9.476154000  | -2.412665000 | 0.000146000  |
| 6  | -11.634235000 | -0.028442000 | -0.000113000 |
| 6  | 9.170853000   | 0.235209000  | 0.000010000  |
| 6  | 9.925824000   | 1.424474000  | -0.000029000 |
| 16 | 10.277729000  | -1.125458000 | 0.000129000  |
| 1  | 9.476154000   | 2.412665000  | -0.000075000 |
| 6  | 11.634235000  | 0.028442000  | -0.000054000 |
| 6  | -12.974262000 | 0.389763000  | -0.000269000 |
| 6  | 12.974263000  | -0.389763000 | -0.000124000 |
| 6  | -14.029105000 | -0.560784000 | -0.000361000 |
| 7  | -14.916572000 | -1.316733000 | -0.000435000 |
| 6  | -13.304060000 | 1.769645000  | -0.000332000 |
| 7  | -13.544872000 | 2.911386000  | -0.000389000 |
| 6  | 13.304060000  | -1.769645000 | -0.000063000 |
| 7  | 13.544872000  | -2.911386000 | -0.000015000 |
| 6  | 14.029105000  | 0.560784000  | -0.000248000 |
| 7  | 14.916573000  | 1.316733000  | -0.000345000 |
| 7  | -11.250963000 | -1.314797000 | -0.000021000 |
| 7  | 11.250963000  | 1.314797000  | -0.000076000 |

S2TIIDT-CS E=-3310.800160 Hartree

|    |              |              |              |
|----|--------------|--------------|--------------|
| 6  | 0.362824000  | -1.936318000 | -0.000022000 |
| 6  | 0.550628000  | -0.450120000 | -0.000054000 |
| 6  | 1.917674000  | -0.244978000 | -0.000019000 |
| 6  | 2.587087000  | -1.523086000 | -0.000015000 |
| 6  | 4.429088000  | -0.125045000 | 0.000009000  |
| 6  | 3.954971000  | -1.472160000 | -0.000001000 |
| 1  | 4.618110000  | -2.328249000 | 0.000005000  |
| 6  | -0.550611000 | 0.449518000  | -0.000095000 |
| 6  | -0.362660000 | 1.935692000  | -0.000099000 |
| 6  | -1.917687000 | 0.244500000  | -0.000150000 |
| 6  | -2.586966000 | 1.522685000  | -0.000125000 |
| 6  | -3.954855000 | 1.471917000  | -0.000126000 |
| 6  | -4.429125000 | 0.124858000  | -0.000115000 |
| 1  | -4.617896000 | 2.328082000  | -0.000102000 |
| 7  | 1.639951000  | -2.521358000 | -0.000027000 |
| 7  | -1.639728000 | 2.520860000  | -0.000109000 |
| 8  | -0.682142000 | -2.570512000 | -0.000023000 |
| 8  | 0.682384000  | 2.569757000  | -0.000087000 |
| 6  | 1.874010000  | -3.951705000 | -0.000031000 |
| 1  | 2.429857000  | -4.257264000 | 0.892377000  |
| 1  | 0.897819000  | -4.438011000 | -0.000034000 |
| 1  | 2.429859000  | -4.257261000 | -0.892440000 |
| 6  | -1.873641000 | 3.951230000  | -0.000100000 |
| 1  | -2.429468000 | 4.256836000  | 0.892305000  |
| 1  | -0.897400000 | 4.437434000  | -0.000084000 |
| 1  | -2.429447000 | 4.256852000  | -0.892512000 |
| 16 | -3.077868000 | -1.056159000 | -0.000234000 |
| 16 | 3.077697000  | 1.055818000  | -0.000002000 |
| 6  | -5.745762000 | -0.301619000 | -0.000079000 |
| 6  | -6.234096000 | -1.641220000 | -0.000110000 |
| 16 | -7.115933000 | 0.823907000  | -0.000003000 |
| 6  | -7.597902000 | -1.748127000 | -0.000058000 |
| 1  | -5.565021000 | -2.494411000 | -0.000166000 |
| 6  | -8.297436000 | -0.500304000 | 0.000010000  |
| 1  | -8.115633000 | -2.698418000 | -0.000067000 |
| 6  | 5.745676000  | 0.301584000  | 0.000025000  |
| 6  | 6.233857000  | 1.641241000  | 0.000033000  |
| 16 | 7.115976000  | -0.823785000 | 0.000037000  |
| 6  | 7.597651000  | 1.748303000  | 0.000048000  |
| 1  | 5.564685000  | 2.494355000  | 0.000027000  |
| 6  | 8.297327000  | 0.500561000  | 0.000054000  |
| 1  | 8.115273000  | 2.698654000  | 0.000057000  |

|   |               |              |             |
|---|---------------|--------------|-------------|
| 6 | -9.675762000  | -0.283571000 | 0.000073000 |
| 6 | -10.236268000 | 1.047727000  | 0.000133000 |
| 6 | -10.607240000 | -1.390302000 | 0.000078000 |
| 6 | -11.575018000 | 1.263047000  | 0.000195000 |
| 1 | -9.558429000  | 1.897826000  | 0.000128000 |
| 6 | -11.949263000 | -1.194303000 | 0.000139000 |
| 1 | -10.218988000 | -2.403678000 | 0.000031000 |
| 6 | -12.538356000 | 0.151784000  | 0.000208000 |
| 1 | -11.990055000 | 2.265916000  | 0.000239000 |
| 1 | -12.644074000 | -2.028134000 | 0.000140000 |
| 6 | 9.675677000   | 0.283985000  | 0.000069000 |
| 6 | 10.236334000  | -1.047250000 | 0.000073000 |
| 6 | 10.607030000  | 1.390821000  | 0.000081000 |
| 6 | 11.575109000  | -1.262418000 | 0.000089000 |
| 1 | 9.558592000   | -1.897426000 | 0.000064000 |
| 6 | 11.949075000  | 1.194974000  | 0.000096000 |
| 1 | 10.218663000  | 2.404153000  | 0.000077000 |
| 6 | 12.538321000  | -0.151045000 | 0.000102000 |
| 1 | 11.990260000  | -2.265240000 | 0.000092000 |
| 1 | 12.643791000  | 2.028885000  | 0.000104000 |
| 8 | -13.759803000 | 0.339515000  | 0.000254000 |
| 8 | 13.759789000  | -0.338638000 | 0.000114000 |

**S3TIIDT-CS** E=-4281.538963 Hartree

|   |              |              |              |
|---|--------------|--------------|--------------|
| 6 | 0.286237000  | 1.949697000  | -0.000007000 |
| 6 | 0.531683000  | 0.469368000  | -0.000025000 |
| 6 | 1.906222000  | 0.318051000  | -0.000029000 |
| 6 | 2.522716000  | 1.621496000  | -0.000028000 |
| 6 | 4.415411000  | 0.295870000  | -0.000039000 |
| 6 | 3.893383000  | 1.622773000  | -0.000035000 |
| 1 | 4.522512000  | 2.504106000  | -0.000035000 |
| 6 | -0.531681000 | -0.469309000 | -0.000032000 |
| 6 | -0.286225000 | -1.949635000 | -0.000048000 |
| 6 | -1.906222000 | -0.318001000 | -0.000028000 |
| 6 | -2.522707000 | -1.621451000 | -0.000033000 |
| 6 | -3.893373000 | -1.622739000 | -0.000024000 |
| 6 | -4.415412000 | -0.295841000 | -0.000013000 |
| 1 | -4.522494000 | -2.504077000 | -0.000025000 |
| 7 | 1.539556000  | 2.583065000  | -0.000022000 |
| 7 | -1.539539000 | -2.583012000 | -0.000044000 |
| 8 | -0.783403000 | 2.538690000  | -0.000010000 |
| 8 | 0.783420000  | -2.538619000 | -0.000058000 |
| 6 | 1.719578000  | 4.022769000  | -0.000023000 |



|    |               |              |              |
|----|---------------|--------------|--------------|
| 1  | 2.263042000   | 4.347668000  | -0.892815000 |
| 1  | 0.726125000   | 4.472391000  | -0.000015000 |
| 1  | 2.263058000   | 4.347667000  | 0.892760000  |
| 6  | -1.719550000  | -4.022717000 | -0.000054000 |
| 1  | -2.263023000  | -4.347613000 | -0.892842000 |
| 1  | -0.726093000  | -4.472331000 | -0.000061000 |
| 1  | -2.263016000  | -4.347627000 | 0.892733000  |
| 16 | -3.114735000  | 0.936284000  | -0.000017000 |
| 16 | 3.114724000   | -0.936243000 | -0.000040000 |
| 6  | -5.750836000  | 0.082141000  | -0.000001000 |
| 6  | -6.289018000  | 1.398607000  | 0.000012000  |
| 16 | -7.072112000  | -1.101401000 | 0.000004000  |
| 6  | -7.659500000  | 1.452147000  | 0.000021000  |
| 1  | -5.654834000  | 2.277890000  | 0.000012000  |
| 6  | -8.295485000  | 0.177535000  | 0.000017000  |
| 1  | -8.228723000  | 2.374248000  | 0.000031000  |
| 6  | 5.750832000   | -0.082124000 | -0.000044000 |
| 6  | 6.289001000   | -1.398596000 | -0.000050000 |
| 16 | 7.072119000   | 1.101405000  | -0.000046000 |
| 6  | 7.659482000   | -1.452149000 | -0.000051000 |
| 1  | 5.654808000   | -2.277872000 | -0.000052000 |
| 6  | 8.295480000   | -0.177544000 | -0.000041000 |
| 1  | 8.228696000   | -2.374256000 | -0.000055000 |
| 6  | -9.658105000  | -0.087709000 | 0.000024000  |
| 6  | -10.300474000 | -1.361495000 | 0.000022000  |
| 16 | -10.915357000 | 1.154793000  | 0.000038000  |
| 1  | -9.744089000  | -2.295214000 | 0.000015000  |
| 6  | -12.141066000 | -0.140790000 | 0.000039000  |
| 6  | 9.658103000   | 0.087686000  | -0.000035000 |
| 6  | 10.300486000  | 1.361465000  | -0.000045000 |
| 16 | 10.915341000  | -1.154830000 | -0.000048000 |
| 1  | 9.744111000   | 2.295190000  | -0.000047000 |
| 6  | 12.141064000  | 0.140740000  | 0.000039000  |
| 6  | -13.504180000 | 0.115661000  | 0.000048000  |
| 6  | 13.504174000  | -0.115727000 | 0.000103000  |
| 6  | -14.448440000 | -0.949726000 | 0.000049000  |
| 7  | -15.246489000 | -1.798184000 | 0.000051000  |
| 6  | -13.987644000 | 1.453024000  | 0.000058000  |
| 7  | -14.350425000 | 2.561101000  | 0.000066000  |
| 6  | 13.987624000  | -1.453095000 | 0.000094000  |
| 7  | 14.350391000  | -2.561176000 | 0.000116000  |
| 6  | 14.448447000  | 0.949650000  | 0.000152000  |
| 7  | 15.246505000  | 1.798098000  | 0.000186000  |
| 7  | -11.611653000 | -1.394897000 | 0.000030000  |

|   |              |             |             |
|---|--------------|-------------|-------------|
| 7 | 11.611664000 | 1.394852000 | 0.000008000 |
|---|--------------|-------------|-------------|

**S2TIIDT-OS** E=-3310.801790 Hartree

|    |              |              |              |
|----|--------------|--------------|--------------|
| 6  | -0.365206000 | -1.932923000 | 0.000014000  |
| 6  | -0.546083000 | -0.442353000 | 0.000004000  |
| 6  | -1.926796000 | -0.234207000 | 0.000023000  |
| 6  | -2.586105000 | -1.498734000 | -0.000002000 |
| 6  | -4.428888000 | -0.108122000 | 0.000023000  |
| 6  | -3.965568000 | -1.445469000 | -0.000006000 |
| 1  | -4.628113000 | -2.302060000 | -0.000026000 |
| 6  | 0.546088000  | 0.442571000  | -0.000008000 |
| 6  | 0.365264000  | 1.933149000  | -0.000006000 |
| 6  | 1.926791000  | 0.234380000  | -0.000024000 |
| 6  | 2.586148000  | 1.498879000  | -0.000046000 |
| 6  | 3.965608000  | 1.445556000  | -0.000061000 |
| 6  | 4.428874000  | 0.108190000  | -0.000033000 |
| 1  | 4.628190000  | 2.302120000  | -0.000076000 |
| 7  | -1.642598000 | -2.507713000 | -0.000024000 |
| 7  | 1.642678000  | 2.507894000  | -0.000055000 |
| 8  | 0.680035000  | -2.568497000 | -0.000034000 |
| 8  | -0.679948000 | 2.568771000  | -0.000047000 |
| 6  | -1.887619000 | -3.935957000 | -0.000071000 |
| 1  | -2.445735000 | -4.237905000 | -0.892409000 |
| 1  | -0.915295000 | -4.430021000 | -0.000075000 |
| 1  | -2.445755000 | -4.237957000 | 0.892237000  |
| 6  | 1.887751000  | 3.936128000  | -0.000100000 |
| 1  | 2.445869000  | 4.238058000  | -0.892443000 |
| 1  | 0.915446000  | 4.430229000  | -0.000092000 |
| 1  | 2.445908000  | 4.238105000  | 0.892203000  |
| 16 | 3.086078000  | -1.064628000 | -0.000046000 |
| 16 | -3.086140000 | 1.064752000  | 0.000047000  |
| 6  | 5.762763000  | -0.331574000 | -0.000015000 |
| 6  | 6.245305000  | -1.657429000 | -0.000002000 |
| 16 | 7.122438000  | 0.794986000  | -0.000012000 |
| 6  | 7.623273000  | -1.760013000 | 0.000015000  |
| 1  | 5.581314000  | -2.514453000 | -0.000003000 |
| 6  | 8.306740000  | -0.520256000 | 0.000012000  |
| 1  | 8.142483000  | -2.709670000 | 0.000028000  |
| 6  | -5.762795000 | 0.331586000  | 0.000030000  |
| 6  | -6.245391000 | 1.657421000  | 0.000058000  |
| 16 | -7.122423000 | -0.795030000 | 0.000003000  |
| 6  | -7.623364000 | 1.759948000  | 0.000058000  |
| 1  | -5.581436000 | 2.514472000  | 0.000078000  |

|   |               |              |              |
|---|---------------|--------------|--------------|
| 6 | -8.306779000  | 0.520163000  | 0.000029000  |
| 1 | -8.142612000  | 2.709584000  | 0.000077000  |
| 6 | 9.698854000   | -0.285506000 | 0.000025000  |
| 6 | 10.240917000  | 1.046517000  | 0.000020000  |
| 6 | 10.634168000  | -1.380802000 | 0.000045000  |
| 6 | 11.582021000  | 1.275887000  | 0.000032000  |
| 1 | 9.556080000   | 1.890744000  | 0.000005000  |
| 6 | 11.978500000  | -1.172069000 | 0.000058000  |
| 1 | 10.255241000  | -2.397615000 | 0.000050000  |
| 6 | 12.550926000  | 0.176269000  | 0.000053000  |
| 1 | 11.986395000  | 2.283051000  | 0.000027000  |
| 1 | 12.680507000  | -1.999813000 | 0.000073000  |
| 6 | -9.698884000  | 0.285356000  | 0.000020000  |
| 6 | -10.240892000 | -1.046689000 | -0.000012000 |
| 6 | -10.634242000 | 1.380613000  | 0.000043000  |
| 6 | -11.581987000 | -1.276114000 | -0.000020000 |
| 1 | -9.556021000  | -1.890888000 | -0.000030000 |
| 6 | -11.978566000 | 1.171826000  | 0.000035000  |
| 1 | -10.255357000 | 2.397442000  | 0.000068000  |
| 6 | -12.550937000 | -0.176535000 | 0.000003000  |
| 1 | -11.986319000 | -2.283295000 | -0.000044000 |
| 1 | -12.680607000 | 1.999541000  | 0.000053000  |
| 8 | 13.775430000  | 0.375962000  | 0.000063000  |
| 8 | -13.775433000 | -0.376279000 | -0.000005000 |

**S3TIIDT-OS** E=-4281.541349 Hartree

|   |              |              |              |
|---|--------------|--------------|--------------|
| 6 | -0.289530000 | -1.946510000 | -0.000082000 |
| 6 | -0.526732000 | -0.460760000 | -0.000211000 |
| 6 | -1.917548000 | -0.306003000 | -0.000211000 |
| 6 | -2.523494000 | -1.593216000 | -0.000125000 |
| 6 | -4.416594000 | -0.275245000 | -0.000208000 |
| 6 | -3.906992000 | -1.592038000 | -0.000123000 |
| 1 | -4.535707000 | -2.473779000 | -0.000068000 |
| 6 | 0.526727000  | 0.460620000  | -0.000295000 |
| 6 | 0.289499000  | 1.946364000  | -0.000422000 |
| 6 | 1.917548000  | 0.305885000  | -0.000350000 |
| 6 | 2.523469000  | 1.593112000  | -0.000249000 |
| 6 | 3.906968000  | 1.591963000  | -0.000180000 |
| 6 | 4.416596000  | 0.275181000  | -0.000242000 |
| 1 | 4.535663000  | 2.473718000  | -0.000082000 |
| 7 | -1.543402000 | -2.567515000 | -0.000066000 |
| 7 | 1.543359000  | 2.567392000  | -0.000193000 |
| 8 | 0.780470000  | -2.537468000 | -0.000050000 |

|    |               |              |              |
|----|---------------|--------------|--------------|
| 8  | -0.780514000  | 2.537298000  | -0.000145000 |
| 6  | -1.736649000  | -4.005015000 | 0.000014000  |
| 1  | -2.283040000  | -4.325931000 | -0.892622000 |
| 1  | -0.747447000  | -4.464027000 | 0.000051000  |
| 1  | -2.283057000  | -4.325826000 | 0.892678000  |
| 6  | 1.736579000   | 4.004896000  | 0.000029000  |
| 1  | 2.283066000   | 4.325888000  | -0.892521000 |
| 1  | 0.747368000   | 4.463889000  | -0.000014000 |
| 1  | 2.282881000   | 4.325651000  | 0.892778000  |
| 16 | 3.124177000   | -0.946730000 | -0.000398000 |
| 16 | -3.124149000  | 0.946638000  | -0.000303000 |
| 6  | 5.771511000   | -0.117258000 | -0.000190000 |
| 6  | 6.302023000   | -1.419790000 | -0.000260000 |
| 16 | 7.081458000   | 1.065826000  | -0.000036000 |
| 6  | 7.687794000   | -1.468491000 | -0.000163000 |
| 1  | 5.672901000   | -2.302480000 | -0.000369000 |
| 6  | 8.307425000   | -0.203915000 | -0.000014000 |
| 1  | 8.257072000   | -2.390712000 | -0.000188000 |
| 6  | -5.771501000  | 0.117223000  | -0.000233000 |
| 6  | -6.301982000  | 1.419768000  | -0.000352000 |
| 16 | -7.081474000  | -1.065831000 | -0.000141000 |
| 6  | -7.687752000  | 1.468500000  | -0.000338000 |
| 1  | -5.672841000  | 2.302443000  | -0.000442000 |
| 6  | -8.307412000  | 0.203938000  | -0.000190000 |
| 1  | -8.257009000  | 2.390733000  | -0.000416000 |
| 6  | 9.682721000   | 0.086569000  | 0.000122000  |
| 6  | 10.306857000  | 1.357876000  | 0.000269000  |
| 16 | 10.940911000  | -1.144103000 | 0.000143000  |
| 1  | 9.746846000   | 2.288586000  | 0.000288000  |
| 6  | 12.158651000  | 0.156770000  | 0.000323000  |
| 6  | -9.682714000  | -0.086514000 | -0.000118000 |
| 6  | -10.306881000 | -1.357805000 | -0.000055000 |
| 16 | -10.940874000 | 1.144188000  | -0.000257000 |
| 1  | -9.746891000  | -2.288529000 | -0.000025000 |
| 6  | -12.158645000 | -0.156656000 | 0.000247000  |
| 6  | 13.531060000  | -0.100068000 | 0.000403000  |
| 6  | -13.531047000 | 0.100215000  | 0.000557000  |
| 6  | 14.470391000  | 0.967045000  | 0.000537000  |
| 7  | 15.265144000  | 1.819292000  | 0.000653000  |
| 6  | 14.018354000  | -1.434155000 | 0.000339000  |
| 7  | 14.387152000  | -2.540738000 | 0.000283000  |
| 6  | -14.018308000 | 1.434314000  | 0.000505000  |
| 7  | -14.387079000 | 2.540905000  | 0.000520000  |
| 6  | -14.470405000 | -0.966874000 | 0.000908000  |

|   |               |              |             |
|---|---------------|--------------|-------------|
| 7 | -15.265178000 | -1.819101000 | 0.001178000 |
| 7 | 11.627828000  | 1.398618000  | 0.000373000 |
| 7 | -11.627852000 | -1.398517000 | 0.000188000 |

**S2TIIDT-T1** E=-3310.796035 Hartree

|    |              |              |              |
|----|--------------|--------------|--------------|
| 6  | 0.366436000  | -1.930765000 | 0.000046000  |
| 6  | 0.538044000  | -0.430769000 | 0.000060000  |
| 6  | 1.941437000  | -0.219133000 | 0.000051000  |
| 6  | 2.584319000  | -1.465229000 | 0.000042000  |
| 6  | 4.430562000  | -0.086032000 | 0.000026000  |
| 6  | 3.979347000  | -1.411324000 | 0.000030000  |
| 1  | 4.640570000  | -2.268971000 | 0.000019000  |
| 6  | -0.538042000 | 0.430711000  | 0.000074000  |
| 6  | -0.366421000 | 1.930705000  | 0.000067000  |
| 6  | -1.941438000 | 0.219087000  | 0.000104000  |
| 6  | -2.584308000 | 1.465190000  | 0.000093000  |
| 6  | -3.979337000 | 1.411302000  | 0.000095000  |
| 6  | -4.430565000 | 0.086014000  | 0.000090000  |
| 1  | -4.640550000 | 2.268955000  | 0.000079000  |
| 7  | 1.642713000  | -2.489647000 | 0.000046000  |
| 7  | -1.642692000 | 2.489600000  | 0.000078000  |
| 8  | -0.679579000 | -2.565876000 | 0.000047000  |
| 8  | 0.679602000  | 2.565804000  | 0.000048000  |
| 6  | 1.904264000  | -3.914576000 | 0.000043000  |
| 1  | 2.466054000  | -4.210710000 | 0.892220000  |
| 1  | 0.938086000  | -4.420613000 | 0.000045000  |
| 1  | 2.466049000  | -4.210707000 | -0.892139000 |
| 6  | -1.904229000 | 3.914531000  | 0.000069000  |
| 1  | -2.466005000 | 4.210677000  | 0.892251000  |
| 1  | -0.938046000 | 4.420558000  | 0.000056000  |
| 1  | -2.466021000 | 4.210662000  | -0.892108000 |
| 16 | -3.099308000 | -1.076006000 | 0.000159000  |
| 16 | 3.099292000  | 1.075974000  | 0.000057000  |
| 6  | -5.786145000 | -0.370121000 | 0.000057000  |
| 6  | -6.262657000 | -1.680450000 | 0.000067000  |
| 16 | -7.132072000 | 0.758895000  | 0.000000000  |
| 6  | -7.657333000 | -1.777025000 | 0.000025000  |
| 1  | -5.604746000 | -2.542022000 | 0.000104000  |
| 6  | -8.321527000 | -0.545227000 | -0.000018000 |
| 1  | -8.179479000 | -2.725299000 | 0.000025000  |
| 6  | 5.786136000  | 0.370118000  | 0.000006000  |
| 6  | 6.262634000  | 1.680452000  | 0.000005000  |
| 16 | 7.132076000  | -0.758884000 | -0.000021000 |

|   |               |              |              |
|---|---------------|--------------|--------------|
| 6 | 7.657309000   | 1.777042000  | -0.000019000 |
| 1 | 5.604713000   | 2.542016000  | 0.000020000  |
| 6 | 8.321517000   | 0.545251000  | -0.000036000 |
| 1 | 8.179445000   | 2.725321000  | -0.000023000 |
| 6 | -9.728470000  | -0.287072000 | -0.000068000 |
| 6 | -10.247637000 | 1.046854000  | -0.000107000 |
| 6 | -10.670274000 | -1.368037000 | -0.000080000 |
| 6 | -11.590546000 | 1.294581000  | -0.000156000 |
| 1 | -9.553100000  | 1.882832000  | -0.000098000 |
| 6 | -12.016437000 | -1.142388000 | -0.000128000 |
| 1 | -10.303317000 | -2.389138000 | -0.000050000 |
| 6 | -12.567773000 | 0.209649000  | -0.000171000 |
| 1 | -11.981133000 | 2.307121000  | -0.000186000 |
| 1 | -12.728143000 | -1.961787000 | -0.000137000 |
| 6 | 9.728462000   | 0.287111000  | -0.000062000 |
| 6 | 10.247644000  | -1.046808000 | -0.000077000 |
| 6 | 10.670254000  | 1.368087000  | -0.000075000 |
| 6 | 11.590555000  | -1.294521000 | -0.000104000 |
| 1 | 9.553116000   | -1.882794000 | -0.000068000 |
| 6 | 12.016419000  | 1.142452000  | -0.000101000 |
| 1 | 10.303286000  | 2.389183000  | -0.000064000 |
| 6 | 12.567771000  | -0.209579000 | -0.000118000 |
| 1 | 11.981153000  | -2.307057000 | -0.000115000 |
| 1 | 12.728116000  | 1.961860000  | -0.000110000 |
| 8 | -13.795142000 | 0.424913000  | -0.000214000 |
| 8 | 13.795142000  | -0.424829000 | -0.000141000 |

**S3TIIDT-T1** E=-4281.537069 Hartree

|   |              |              |              |
|---|--------------|--------------|--------------|
| 6 | 0.290568000  | 1.944489000  | -0.000448000 |
| 6 | 0.520650000  | 0.451561000  | -0.000206000 |
| 6 | 1.929645000  | 0.294409000  | -0.000336000 |
| 6 | 2.523623000  | 1.566602000  | -0.000210000 |
| 6 | 4.418918000  | 0.256829000  | -0.000189000 |
| 6 | 3.918901000  | 1.565028000  | -0.000114000 |
| 1 | 4.546620000  | 2.447544000  | 0.000031000  |
| 6 | -0.520651000 | -0.451628000 | -0.000036000 |
| 6 | -0.290583000 | -1.944559000 | 0.000218000  |
| 6 | -1.929645000 | -0.294464000 | -0.000001000 |
| 6 | -2.523635000 | -1.566651000 | 0.000086000  |
| 6 | -3.918913000 | -1.565062000 | 0.000077000  |
| 6 | -4.418916000 | -0.256858000 | 0.000005000  |
| 1 | -4.546641000 | -2.447571000 | 0.000131000  |
| 7 | 1.544016000  | 2.552970000  | -0.000114000 |

|    |               |              |              |
|----|---------------|--------------|--------------|
| 7  | -1.544037000  | -2.553028000 | 0.000131000  |
| 8  | -0.780044000  | 2.535569000  | 0.000029000  |
| 8  | 0.780022000   | -2.535651000 | 0.000112000  |
| 6  | 1.750123000   | 3.988144000  | 0.000220000  |
| 1  | 2.299680000   | 4.305065000  | -0.892119000 |
| 1  | 0.765266000   | 4.456522000  | 0.000166000  |
| 1  | 2.299419000   | 4.304708000  | 0.892848000  |
| 6  | -1.750157000  | -3.988200000 | 0.000136000  |
| 1  | -2.299535000  | -4.304954000 | -0.892374000 |
| 1  | -0.765305000  | -4.456588000 | 0.000202000  |
| 1  | -2.299638000  | -4.304922000 | 0.892593000  |
| 16 | -3.133931000  | 0.955552000  | -0.000129000 |
| 16 | 3.133945000   | -0.955594000 | -0.000428000 |
| 6  | -5.790209000  | 0.148324000  | -0.000010000 |
| 6  | -6.314694000  | 1.440414000  | -0.000099000 |
| 16 | -7.090503000  | -1.034592000 | 0.000094000  |
| 6  | -7.712705000  | 1.485170000  | -0.000093000 |
| 1  | -5.689477000  | 2.325676000  | -0.000171000 |
| 6  | -8.319368000  | 0.227805000  | 0.000000000  |
| 1  | -8.282370000  | 2.407280000  | -0.000158000 |
| 6  | 5.790215000   | -0.148338000 | -0.000085000 |
| 6  | 6.314714000   | -1.440423000 | -0.000151000 |
| 16 | 7.090497000   | 1.034592000  | 0.000185000  |
| 6  | 7.712725000   | -1.485164000 | -0.000025000 |
| 1  | 5.689506000   | -2.325692000 | -0.000295000 |
| 6  | 8.319375000   | -0.227793000 | 0.000124000  |
| 1  | 8.282400000   | -2.407268000 | -0.000059000 |
| 6  | -9.703792000  | -0.084052000 | 0.000026000  |
| 6  | -10.312536000 | -1.354750000 | 0.000121000  |
| 16 | -10.963795000 | 1.135708000  | -0.000064000 |
| 1  | -9.748432000  | -2.282297000 | 0.000188000  |
| 6  | -12.174081000 | -0.170699000 | 0.000048000  |
| 6  | 9.703796000   | 0.084079000  | 0.000248000  |
| 6  | 10.312527000  | 1.354783000  | 0.000488000  |
| 16 | 10.963811000  | -1.135668000 | 0.000277000  |
| 1  | 9.748413000   | 2.282325000  | 0.000597000  |
| 6  | 12.174084000  | 0.170751000  | 0.000146000  |
| 6  | -13.554118000 | 0.085391000  | 0.000042000  |
| 6  | 13.554123000  | -0.085324000 | -0.000079000 |
| 6  | -14.488668000 | -0.983746000 | 0.000131000  |
| 7  | -15.280085000 | -1.839681000 | 0.000202000  |
| 6  | -14.045741000 | 1.416352000  | -0.000054000 |
| 7  | -14.420668000 | 2.521281000  | -0.000135000 |
| 6  | 14.045760000  | -1.416279000 | -0.000242000 |

|   |               |              |              |
|---|---------------|--------------|--------------|
| 7 | 14.420699000  | -2.521204000 | -0.000405000 |
| 6 | 14.488662000  | 0.983824000  | -0.000111000 |
| 7 | 15.280070000  | 1.839766000  | -0.000130000 |
| 7 | -11.641146000 | -1.402661000 | 0.000133000  |
| 7 | 11.641135000  | 1.402709000  | 0.000398000  |

**S2IIDS0-CS** E=-1298.683180 Hartree

|   |              |              |              |
|---|--------------|--------------|--------------|
| 6 | -1.161315000 | 1.195028000  | -0.273365000 |
| 6 | -0.283480000 | 0.047492000  | -0.130535000 |
| 6 | -0.908405000 | -1.212005000 | 0.130536000  |
| 6 | -2.266673000 | -1.294905000 | 0.230514000  |
| 6 | -3.146453000 | -0.155119000 | 0.071626000  |
| 6 | -2.519878000 | 1.115225000  | -0.188187000 |
| 6 | 0.972045000  | 1.971225000  | -0.462826000 |
| 6 | 1.035706000  | 0.486273000  | -0.229187000 |
| 1 | -0.296316000 | -2.098784000 | 0.213218000  |
| 1 | -2.698666000 | -2.271181000 | 0.404554000  |
| 1 | -3.113301000 | 2.014579000  | -0.280688000 |
| 6 | 2.270776000  | -0.243453000 | -0.188933000 |
| 6 | 3.553626000  | 0.164669000  | 0.164229000  |
| 6 | 2.375343000  | -1.681312000 | -0.609139000 |
| 6 | 4.458358000  | -0.968885000 | -0.008390000 |
| 6 | 4.106184000  | 1.382421000  | 0.689587000  |
| 6 | 5.783141000  | -0.911499000 | 0.278921000  |
| 6 | 5.430071000  | 1.451178000  | 0.986370000  |
| 1 | 3.463451000  | 2.242050000  | 0.813932000  |
| 6 | 6.338923000  | 0.327156000  | 0.795007000  |
| 1 | 6.435686000  | -1.767173000 | 0.139661000  |
| 1 | 5.849478000  | 2.372701000  | 1.379226000  |
| 8 | 1.507130000  | -2.442164000 | -1.013932000 |
| 8 | 1.879215000  | 2.772519000  | -0.637519000 |
| 7 | 3.719188000  | -2.037802000 | -0.482583000 |
| 7 | -0.380954000 | 2.317875000  | -0.478002000 |
| 6 | -0.853895000 | 3.668797000  | -0.692853000 |
| 1 | -1.486682000 | 3.725348000  | -1.585034000 |
| 1 | -1.422915000 | 4.028525000  | 0.171443000  |
| 1 | 0.024632000  | 4.299177000  | -0.833989000 |
| 6 | 4.227505000  | -3.351909000 | -0.811493000 |
| 1 | 4.978609000  | -3.294293000 | -1.606725000 |
| 1 | 4.674672000  | -3.831360000 | 0.066343000  |
| 1 | 3.381635000  | -3.947269000 | -1.156818000 |
| 6 | -4.552261000 | -0.284482000 | 0.169526000  |
| 6 | -5.443484000 | 0.813702000  | -0.139030000 |



|   |              |              |              |
|---|--------------|--------------|--------------|
| 6 | -5.184450000 | -1.518494000 | 0.585508000  |
| 6 | -6.792741000 | 0.704304000  | -0.050594000 |
| 1 | -5.024701000 | 1.752728000  | -0.481778000 |
| 6 | -6.531121000 | -1.646369000 | 0.691876000  |
| 1 | -4.564764000 | -2.367010000 | 0.849357000  |
| 6 | -7.443758000 | -0.540162000 | 0.378705000  |
| 1 | -7.446632000 | 1.533827000  | -0.301051000 |
| 1 | -6.987255000 | -2.575061000 | 1.020143000  |
| 6 | 7.658534000  | 0.443055000  | 1.099114000  |
| 8 | -8.671886000 | -0.647111000 | 0.468785000  |
| 1 | 8.347804000  | -0.384135000 | 0.963674000  |
| 1 | 8.068165000  | 1.369273000  | 1.488040000  |

**S3IIDS0-CS** E=-1784.057381 Hartree

|   |              |              |              |
|---|--------------|--------------|--------------|
| 6 | 5.305557000  | -1.166314000 | -0.008754000 |
| 6 | 4.507492000  | 0.038712000  | 0.196064000  |
| 6 | 5.158464000  | 1.179009000  | 0.775825000  |
| 6 | 6.479656000  | 1.115593000  | 1.089240000  |
| 6 | 7.283878000  | -0.077933000 | 0.862207000  |
| 6 | 6.626693000  | -1.240685000 | 0.294095000  |
| 6 | 3.175696000  | -1.666817000 | -0.655710000 |
| 6 | 3.195322000  | -0.239039000 | -0.187404000 |
| 1 | 4.595080000  | 2.087907000  | 0.929097000  |
| 1 | 6.974778000  | 1.979053000  | 1.523349000  |
| 1 | 7.200766000  | -2.146335000 | 0.128783000  |
| 6 | 2.035793000  | 0.599650000  | -0.219195000 |
| 6 | 0.677084000  | 0.281974000  | -0.171882000 |
| 6 | 2.113845000  | 2.096169000  | -0.392071000 |
| 6 | -0.084280000 | 1.512867000  | -0.286299000 |
| 6 | -0.060689000 | -0.927863000 | 0.018926000  |
| 6 | -1.447482000 | 1.556647000  | -0.238920000 |
| 6 | -1.424634000 | -0.892855000 | 0.072642000  |
| 1 | 0.469597000  | -1.866520000 | 0.090634000  |
| 6 | -2.175761000 | 0.331338000  | -0.057789000 |
| 1 | -1.968630000 | 2.501366000  | -0.328538000 |
| 1 | -1.967801000 | -1.821401000 | 0.214039000  |
| 8 | 3.095244000  | 2.813950000  | -0.511610000 |
| 8 | 2.247535000  | -2.330670000 | -1.095308000 |
| 7 | 0.800277000  | 2.565340000  | -0.428010000 |
| 7 | 4.479725000  | -2.145697000 | -0.530239000 |
| 6 | 4.872995000  | -3.488755000 | -0.901475000 |

|    |              |              |              |
|----|--------------|--------------|--------------|
| 1  | 5.636459000  | -3.469908000 | -1.686428000 |
| 1  | 5.263346000  | -4.035915000 | -0.036497000 |
| 1  | 3.982340000  | -3.993691000 | -1.276542000 |
| 6  | 0.457354000  | 3.962429000  | -0.597527000 |
| 1  | -0.141268000 | 4.110946000  | -1.502329000 |
| 1  | -0.100733000 | 4.337128000  | 0.267232000  |
| 1  | 1.392471000  | 4.515370000  | -0.690254000 |
| 6  | 8.604947000  | -0.093268000 | 1.183587000  |
| 6  | -3.577665000 | 0.325286000  | -0.002459000 |
| 6  | -4.462240000 | 1.440976000  | -0.116412000 |
| 16 | -4.571437000 | -1.115954000 | 0.230074000  |
| 1  | -4.111911000 | 2.456654000  | -0.267975000 |
| 6  | -6.024894000 | -0.094218000 | 0.153663000  |
| 6  | -7.311770000 | -0.598402000 | 0.275338000  |
| 6  | -7.531663000 | -1.989495000 | 0.472872000  |
| 7  | -7.683167000 | -3.134145000 | 0.634742000  |
| 6  | -8.443293000 | 0.263029000  | 0.206803000  |
| 7  | -9.390392000 | 0.939271000  | 0.155861000  |
| 7  | -5.754424000 | 1.227092000  | -0.034906000 |
| 1  | 9.218756000  | -0.973672000 | 1.023129000  |
| 1  | 9.090946000  | 0.776824000  | 1.612123000  |

**S2IIDS0-OS** E=-1298.684448 Hartree

|   |              |              |              |
|---|--------------|--------------|--------------|
| 6 | -1.160413000 | 1.175277000  | -0.231549000 |
| 6 | -0.300716000 | 0.026437000  | -0.122281000 |
| 6 | -0.927865000 | -1.225807000 | 0.100408000  |
| 6 | -2.298967000 | -1.304169000 | 0.194971000  |
| 6 | -3.152599000 | -0.162974000 | 0.061609000  |
| 6 | -2.529234000 | 1.102052000  | -0.157236000 |
| 6 | 0.971841000  | 1.970914000  | -0.367189000 |
| 6 | 1.045225000  | 0.476307000  | -0.192115000 |
| 1 | -0.325123000 | -2.120001000 | 0.160319000  |
| 1 | -2.742689000 | -2.283034000 | 0.326602000  |
| 1 | -3.120546000 | 2.007019000  | -0.211771000 |
| 6 | 2.269681000  | -0.239845000 | -0.164227000 |
| 6 | 3.582225000  | 0.178942000  | 0.138292000  |
| 6 | 2.370205000  | -1.697317000 | -0.539140000 |
| 6 | 4.468365000  | -0.959807000 | -0.024946000 |
| 6 | 4.157250000  | 1.397815000  | 0.614041000  |
| 6 | 5.806026000  | -0.908068000 | 0.222843000  |
| 6 | 5.495888000  | 1.464373000  | 0.873560000  |
| 1 | 3.527262000  | 2.266357000  | 0.736414000  |
| 6 | 6.385085000  | 0.333967000  | 0.686050000  |

|   |              |              |              |
|---|--------------|--------------|--------------|
| 1 | 6.443876000  | -1.775498000 | 0.088813000  |
| 1 | 5.929473000  | 2.393752000  | 1.230735000  |
| 8 | 1.497705000  | -2.474315000 | -0.901150000 |
| 8 | 1.872427000  | 2.787798000  | -0.510744000 |
| 7 | 3.715082000  | -2.044455000 | -0.443746000 |
| 7 | -0.379697000 | 2.308583000  | -0.387107000 |
| 6 | -0.857792000 | 3.663487000  | -0.561027000 |
| 1 | -1.483011000 | 3.746033000  | -1.456569000 |
| 1 | -1.437270000 | 3.990847000  | 0.309236000  |
| 1 | 0.018193000  | 4.303025000  | -0.672800000 |
| 6 | 4.217734000  | -3.366816000 | -0.747926000 |
| 1 | 4.947851000  | -3.329711000 | -1.563599000 |
| 1 | 4.689375000  | -3.819309000 | 0.131391000  |
| 1 | 3.365174000  | -3.973855000 | -1.053749000 |
| 6 | -4.584690000 | -0.283878000 | 0.145836000  |
| 6 | -5.454679000 | 0.758638000  | -0.323727000 |
| 6 | -5.210832000 | -1.449488000 | 0.705983000  |
| 6 | -6.812492000 | 0.656507000  | -0.252404000 |
| 1 | -5.020756000 | 1.636379000  | -0.790187000 |
| 6 | -6.565930000 | -1.566877000 | 0.803196000  |
| 1 | -4.587848000 | -2.242867000 | 1.103290000  |
| 6 | -7.464239000 | -0.517870000 | 0.324980000  |
| 1 | -7.461550000 | 1.439503000  | -0.631754000 |
| 1 | -7.028593000 | -2.441471000 | 1.249515000  |
| 6 | 7.723720000  | 0.444532000  | 0.948041000  |
| 8 | -8.701478000 | -0.616865000 | 0.403289000  |
| 1 | 8.399443000  | -0.393693000 | 0.813293000  |
| 1 | 8.153040000  | 1.376672000  | 1.299387000  |

**S3IIDS0-OS** E=-1784.058489 Hartree

|   |             |              |              |
|---|-------------|--------------|--------------|
| 6 | 5.320089000 | -1.158976000 | -0.012562000 |
| 6 | 4.539254000 | 0.052292000  | 0.169858000  |
| 6 | 5.212710000 | 1.201296000  | 0.688243000  |
| 6 | 6.547450000 | 1.139357000  | 0.967023000  |
| 6 | 7.332967000 | -0.062070000 | 0.758538000  |
| 6 | 6.652894000 | -1.234743000 | 0.253866000  |
| 6 | 3.172487000 | -1.688967000 | -0.573114000 |
| 6 | 3.199682000 | -0.237373000 | -0.162689000 |
| 1 | 4.661781000 | 2.119451000  | 0.827683000  |
| 1 | 7.057631000 | 2.015209000  | 1.356458000  |
| 1 | 7.212578000 | -2.151987000 | 0.104152000  |
| 6 | 2.047839000 | 0.589486000  | -0.192745000 |
| 6 | 0.666648000 | 0.265461000  | -0.158654000 |

|    |              |              |              |
|----|--------------|--------------|--------------|
| 6  | 2.116510000  | 2.089607000  | -0.339060000 |
| 6  | -0.081399000 | 1.493083000  | -0.258763000 |
| 6  | -0.072529000 | -0.932901000 | 0.019356000  |
| 6  | -1.451510000 | 1.544590000  | -0.215619000 |
| 6  | -1.446324000 | -0.891874000 | 0.069714000  |
| 1  | 0.448677000  | -1.876310000 | 0.086716000  |
| 6  | -2.180982000 | 0.328250000  | -0.051873000 |
| 1  | -1.965105000 | 2.494417000  | -0.295966000 |
| 1  | -1.990230000 | -1.821631000 | 0.200747000  |
| 8  | 3.091858000  | 2.819850000  | -0.445917000 |
| 8  | 2.237076000  | -2.372358000 | -0.964229000 |
| 7  | 0.802751000  | 2.550774000  | -0.381042000 |
| 7  | 4.478288000  | -2.158798000 | -0.470638000 |
| 6  | 4.863832000  | -3.514355000 | -0.802629000 |
| 1  | 5.605270000  | -3.522994000 | -1.608568000 |
| 1  | 5.279916000  | -4.028045000 | 0.070832000  |
| 1  | 3.964598000  | -4.034417000 | -1.133662000 |
| 6  | 0.454774000  | 3.948136000  | -0.535114000 |
| 1  | -0.138578000 | 4.105378000  | -1.442020000 |
| 1  | -0.111385000 | 4.309306000  | 0.330289000  |
| 1  | 1.387833000  | 4.506491000  | -0.614271000 |
| 6  | 8.671268000  | -0.078933000 | 1.040712000  |
| 6  | -3.602389000 | 0.336671000  | -0.004920000 |
| 6  | -4.473334000 | 1.449074000  | -0.118110000 |
| 16 | -4.593479000 | -1.099878000 | 0.214031000  |
| 1  | -4.122554000 | 2.464974000  | -0.263182000 |
| 6  | -6.044535000 | -0.078199000 | 0.134049000  |
| 6  | -7.338796000 | -0.591402000 | 0.246752000  |
| 6  | -7.557188000 | -1.982165000 | 0.435163000  |
| 7  | -7.709662000 | -3.128169000 | 0.589888000  |
| 6  | -8.469662000 | 0.267484000  | 0.176467000  |
| 7  | -9.417292000 | 0.943729000  | 0.123528000  |
| 7  | -5.775939000 | 1.233969000  | -0.044726000 |
| 1  | 9.271533000  | -0.970444000 | 0.891590000  |
| 1  | 9.176650000  | 0.801240000  | 1.423484000  |

**S2IIDS0-T1** E=-1298.677257 Hartree

|   |              |              |              |
|---|--------------|--------------|--------------|
| 6 | -1.162105000 | 1.147425000  | -0.151431000 |
| 6 | -0.328855000 | -0.003282000 | -0.085183000 |
| 6 | -0.960117000 | -1.244720000 | 0.075785000  |
| 6 | -2.350229000 | -1.316374000 | 0.144401000  |

|   |              |              |              |
|---|--------------|--------------|--------------|
| 6 | -3.165552000 | -0.170992000 | 0.050554000  |
| 6 | -2.544024000 | 1.087559000  | -0.098064000 |
| 6 | 0.970977000  | 1.966483000  | -0.209573000 |
| 6 | 1.060631000  | 0.460182000  | -0.116862000 |
| 1 | -0.369804000 | -2.146766000 | 0.118079000  |
| 1 | -2.813140000 | -2.293392000 | 0.228756000  |
| 1 | -3.134788000 | 1.995845000  | -0.123624000 |
| 6 | 2.265776000  | -0.232882000 | -0.110992000 |
| 6 | 3.628380000  | 0.201566000  | 0.098133000  |
| 6 | 2.362414000  | -1.721930000 | -0.400879000 |
| 6 | 4.482971000  | -0.945119000 | -0.048274000 |
| 6 | 4.239323000  | 1.423116000  | 0.471768000  |
| 6 | 5.840678000  | -0.903849000 | 0.122280000  |
| 6 | 5.603176000  | 1.485421000  | 0.655217000  |
| 1 | 3.630566000  | 2.306333000  | 0.588106000  |
| 6 | 6.457750000  | 0.343347000  | 0.481439000  |
| 1 | 6.453706000  | -1.790593000 | 0.000098000  |
| 1 | 6.060882000  | 2.429191000  | 0.936263000  |
| 8 | 1.482330000  | -2.525824000 | -0.672991000 |
| 8 | 1.860005000  | 2.805307000  | -0.294466000 |
| 7 | 3.706614000  | -2.054437000 | -0.361867000 |
| 7 | -0.378079000 | 2.290355000  | -0.242468000 |
| 6 | -0.863764000 | 3.649041000  | -0.353267000 |
| 1 | -1.477348000 | 3.772051000  | -1.252305000 |
| 1 | -1.459497000 | 3.925641000  | 0.523719000  |
| 1 | 0.008085000  | 4.300170000  | -0.418737000 |
| 6 | 4.200505000  | -3.390800000 | -0.616166000 |
| 1 | 4.886192000  | -3.396499000 | -1.470264000 |
| 1 | 4.722549000  | -3.788296000 | 0.261178000  |
| 1 | 3.337844000  | -4.018512000 | -0.840055000 |
| 6 | -4.633508000 | -0.279053000 | 0.104749000  |
| 6 | -5.460325000 | 0.636537000  | -0.604339000 |
| 6 | -5.263554000 | -1.300295000 | 0.869834000  |
| 6 | -6.829653000 | 0.547106000  | -0.562063000 |
| 1 | -4.991255000 | 1.398691000  | -1.218899000 |
| 6 | -6.630677000 | -1.406494000 | 0.934315000  |
| 1 | -4.644132000 | -1.985392000 | 1.439845000  |
| 6 | -7.494858000 | -0.483995000 | 0.216944000  |
| 1 | -7.463042000 | 1.233457000  | -1.115055000 |
| 1 | -7.114663000 | -2.173938000 | 1.529967000  |
| 6 | 7.828333000  | 0.443944000  | 0.661428000  |
| 8 | -8.745309000 | -0.572424000 | 0.266884000  |
| 1 | 8.480147000  | -0.413557000 | 0.532752000  |
| 1 | 8.289595000  | 1.386028000  | 0.936584000  |

S3IIDS0-T1 E=-1784.050723 Hartree

|    |              |              |              |
|----|--------------|--------------|--------------|
| 6  | 5.353522000  | -1.127051000 | -0.064708000 |
| 6  | 4.593472000  | 0.077313000  | 0.138857000  |
| 6  | 5.291032000  | 1.215838000  | 0.613003000  |
| 6  | 6.647830000  | 1.149167000  | 0.836286000  |
| 6  | 7.409101000  | -0.048474000 | 0.605713000  |
| 6  | 6.703122000  | -1.212748000 | 0.144255000  |
| 6  | 3.188695000  | -1.692423000 | -0.525436000 |
| 6  | 3.209572000  | -0.222552000 | -0.134906000 |
| 1  | 4.754053000  | 2.137819000  | 0.773989000  |
| 1  | 7.173754000  | 2.028912000  | 1.194621000  |
| 1  | 7.244656000  | -2.137808000 | -0.022720000 |
| 6  | 2.067768000  | 0.573289000  | -0.126531000 |
| 6  | 0.646088000  | 0.228686000  | -0.158078000 |
| 6  | 2.108668000  | 2.082219000  | -0.129498000 |
| 6  | -0.086710000 | 1.450228000  | -0.175667000 |
| 6  | -0.088349000 | -0.963836000 | -0.087648000 |
| 6  | -1.468486000 | 1.504915000  | -0.159139000 |
| 6  | -1.479694000 | -0.924666000 | -0.068079000 |
| 1  | 0.424834000  | -1.912692000 | -0.078070000 |
| 6  | -2.191336000 | 0.291044000  | -0.113317000 |
| 1  | -1.981160000 | 2.459287000  | -0.146132000 |
| 1  | -2.024494000 | -1.863115000 | -0.045865000 |
| 8  | 3.066433000  | 2.845211000  | -0.139865000 |
| 8  | 2.250926000  | -2.394926000 | -0.873574000 |
| 7  | 0.791493000  | 2.523299000  | -0.178393000 |
| 7  | 4.497316000  | -2.141861000 | -0.474788000 |
| 6  | 4.884591000  | -3.497091000 | -0.805994000 |
| 1  | 5.595459000  | -3.505566000 | -1.639004000 |
| 1  | 5.340792000  | -3.994717000 | 0.056674000  |
| 1  | 3.980166000  | -4.031796000 | -1.096359000 |
| 6  | 0.426482000  | 3.923703000  | -0.218752000 |
| 1  | -0.146871000 | 4.151355000  | -1.123772000 |
| 1  | -0.168015000 | 4.199907000  | 0.659114000  |
| 1  | 1.352345000  | 4.499061000  | -0.223620000 |
| 6  | 8.775559000  | -0.076951000 | 0.828798000  |
| 6  | -3.645332000 | 0.316684000  | -0.114225000 |
| 6  | -4.492334000 | 1.359892000  | -0.508370000 |
| 16 | -4.628676000 | -1.028973000 | 0.402173000  |
| 1  | -4.133313000 | 2.306436000  | -0.895621000 |
| 6  | -6.077247000 | -0.070916000 | 0.036344000  |
| 6  | -7.384873000 | -0.572672000 | 0.229195000  |

|   |              |              |              |
|---|--------------|--------------|--------------|
| 6 | -7.600415000 | -1.884504000 | 0.720107000  |
| 7 | -7.754981000 | -2.968092000 | 1.125598000  |
| 6 | -8.515220000 | 0.231686000  | -0.064820000 |
| 7 | -9.464354000 | 0.868552000  | -0.296905000 |
| 7 | -5.813407000 | 1.151494000  | -0.427568000 |
| 1 | 9.357996000  | -0.976083000 | 0.658374000  |
| 1 | 9.304219000  | 0.801865000  | 1.181212000  |

**S1TIIDS0-CS** E=-1768.019941 Hartree

|   |              |              |              |
|---|--------------|--------------|--------------|
| 6 | 5.279039000  | -1.202788000 | -0.013341000 |
| 6 | 4.499106000  | 0.013245000  | 0.198915000  |
| 6 | 5.166727000  | 1.137151000  | 0.793408000  |
| 6 | 6.483864000  | 1.047754000  | 1.115469000  |
| 6 | 7.269724000  | -0.157739000 | 0.883550000  |
| 6 | 6.595974000  | -1.303166000 | 0.298537000  |
| 6 | 3.145587000  | -1.657596000 | -0.682243000 |
| 6 | 3.186669000  | -0.236956000 | -0.195779000 |
| 1 | 4.617768000  | 2.054439000  | 0.950065000  |
| 1 | 6.991079000  | 1.898549000  | 1.560666000  |
| 1 | 7.155471000  | -2.217098000 | 0.128397000  |
| 6 | 2.040222000  | 0.623096000  | -0.224171000 |
| 6 | 0.677479000  | 0.326384000  | -0.179384000 |
| 6 | 2.143833000  | 2.116101000  | -0.385346000 |
| 6 | -0.065454000 | 1.570059000  | -0.285348000 |
| 6 | -0.080183000 | -0.873085000 | 0.001304000  |
| 6 | -1.427228000 | 1.634388000  | -0.238605000 |
| 6 | -1.442863000 | -0.817217000 | 0.054397000  |
| 1 | 0.435058000  | -1.820692000 | 0.065124000  |
| 6 | -2.177007000 | 0.419529000  | -0.066958000 |
| 1 | -1.934371000 | 2.587455000  | -0.321159000 |
| 1 | -1.997188000 | -1.740523000 | 0.187710000  |
| 8 | 3.136331000  | 2.820969000  | -0.497395000 |
| 8 | 2.209355000  | -2.299890000 | -1.137316000 |
| 7 | 0.837018000  | 2.608169000  | -0.418733000 |
| 7 | 4.439948000  | -2.161999000 | -0.551428000 |
| 6 | 4.811694000  | -3.507360000 | -0.934539000 |
| 1 | 5.582245000  | -3.494165000 | -1.712797000 |
| 1 | 5.184721000  | -4.071802000 | -0.072902000 |
| 1 | 3.915041000  | -3.991417000 | -1.322802000 |
| 6 | 0.519087000  | 4.011517000  | -0.577322000 |
| 1 | -0.076172000 | 4.178607000  | -1.481357000 |
| 1 | -0.033135000 | 4.390061000  | 0.289800000  |
| 1 | 1.464275000  | 4.548143000  | -0.664915000 |

|    |              |              |              |
|----|--------------|--------------|--------------|
| 6  | 8.587511000  | -0.199756000 | 1.214687000  |
| 6  | -3.576943000 | 0.439047000  | -0.013162000 |
| 6  | -4.445455000 | 1.564356000  | -0.121225000 |
| 16 | -4.548694000 | -1.031301000 | 0.214550000  |
| 6  | -5.779449000 | 1.274107000  | -0.028630000 |
| 1  | -4.072656000 | 2.570540000  | -0.267017000 |
| 6  | -6.049252000 | -0.117706000 | 0.161326000  |
| 1  | -6.579080000 | 2.002163000  | -0.088992000 |
| 6  | -7.300187000 | -0.710651000 | 0.291192000  |
| 6  | -8.476102000 | 0.089995000  | 0.238727000  |
| 7  | -9.422849000 | 0.768805000  | 0.192465000  |
| 6  | -7.444537000 | -2.112644000 | 0.478861000  |
| 7  | -7.534543000 | -3.265035000 | 0.632491000  |
| 1  | 9.085585000  | 0.657322000  | 1.655433000  |
| 1  | 9.186813000  | -1.089364000 | 1.050153000  |

S2TIIDS0-CS E=-1850.500703 Hartree

|   |              |              |              |
|---|--------------|--------------|--------------|
| 6 | 0.747245000  | 1.690987000  | -0.284109000 |
| 6 | 1.412831000  | 0.405410000  | -0.196269000 |
| 6 | 0.583032000  | -0.747365000 | -0.051303000 |
| 6 | -0.776991000 | -0.610322000 | -0.014155000 |
| 6 | -1.432669000 | 0.666836000  | -0.116938000 |
| 6 | -0.610595000 | 1.835567000  | -0.252282000 |
| 6 | 2.988364000  | 2.105917000  | -0.343454000 |
| 6 | 2.795379000  | 0.623291000  | -0.217685000 |
| 1 | 1.038692000  | -1.725847000 | -0.002014000 |
| 1 | -1.386919000 | -1.501723000 | 0.091723000  |
| 1 | -1.057880000 | 2.819515000  | -0.320602000 |
| 6 | 3.887785000  | -0.304518000 | -0.189628000 |
| 6 | 5.208454000  | -0.140943000 | 0.223787000  |
| 6 | 3.768858000  | -1.713074000 | -0.699257000 |
| 6 | 5.916886000  | -1.397902000 | 0.003427000  |
| 6 | 5.937131000  | 0.931414000  | 0.841795000  |
| 6 | 7.220473000  | -1.584199000 | 0.331254000  |
| 6 | 7.241696000  | 0.756814000  | 1.180045000  |
| 1 | 5.443338000  | 1.878964000  | 1.002505000  |
| 6 | 7.956275000  | -0.491391000 | 0.942379000  |
| 1 | 7.724410000  | -2.528947000 | 0.155292000  |
| 1 | 7.793849000  | 1.569302000  | 1.643202000  |
| 8 | 2.803357000  | -2.292980000 | -1.177658000 |
| 8 | 4.020651000  | 2.758763000  | -0.426950000 |
| 7 | 5.028462000  | -2.297310000 | -0.559415000 |



|    |               |              |              |
|----|---------------|--------------|--------------|
| 7  | 1.711893000   | 2.675661000  | -0.383478000 |
| 6  | 1.481318000   | 4.097646000  | -0.514628000 |
| 1  | 0.910555000   | 4.321267000  | -1.422593000 |
| 1  | 0.939662000   | 4.491200000  | 0.352857000  |
| 1  | 2.458705000   | 4.577346000  | -0.577113000 |
| 6  | 5.323147000   | -3.656412000 | -0.957908000 |
| 1  | 6.104180000   | -3.679566000 | -1.725644000 |
| 1  | 5.649556000   | -4.255578000 | -0.100576000 |
| 1  | 4.404167000   | -4.079127000 | -1.365338000 |
| 6  | -2.835113000  | 0.771984000  | -0.080775000 |
| 6  | -3.629678000  | 1.946868000  | -0.173588000 |
| 16 | -3.899044000  | -0.630015000 | 0.099002000  |
| 6  | -4.983120000  | 1.733748000  | -0.104647000 |
| 1  | -3.195645000  | 2.931943000  | -0.290956000 |
| 6  | -5.360957000  | 0.367070000  | 0.048560000  |
| 1  | -5.710674000  | 2.533038000  | -0.161616000 |
| 6  | 9.264228000   | -0.620278000 | 1.290558000  |
| 6  | -6.649346000  | -0.168682000 | 0.149125000  |
| 6  | -6.872938000  | -1.586342000 | 0.301890000  |
| 6  | -7.816950000  | 0.681735000  | 0.104481000  |
| 6  | -8.120920000  | -2.109484000 | 0.401063000  |
| 1  | -6.011662000  | -2.248646000 | 0.337605000  |
| 6  | -9.072795000  | 0.176996000  | 0.202181000  |
| 1  | -7.682869000  | 1.752541000  | -0.010134000 |
| 6  | -9.321366000  | -1.262204000 | 0.358843000  |
| 1  | -8.282608000  | -3.176580000 | 0.515685000  |
| 1  | -9.946677000  | 0.819849000  | 0.168295000  |
| 8  | -10.462197000 | -1.730387000 | 0.449326000  |
| 1  | 9.808297000   | 0.197872000  | 1.750495000  |
| 1  | 9.809261000   | -1.543203000 | 1.120824000  |

**S3TIIDS0-CS** E=-2335.871539 Hartree

|   |              |              |              |
|---|--------------|--------------|--------------|
| 6 | 1.808275000  | 1.676595000  | -0.274927000 |
| 6 | 2.467368000  | 0.388525000  | -0.192790000 |
| 6 | 1.633471000  | -0.762267000 | -0.064598000 |
| 6 | 0.272954000  | -0.620645000 | -0.038470000 |
| 6 | -0.374957000 | 0.659159000  | -0.136920000 |
| 6 | 0.449434000  | 1.825460000  | -0.254348000 |
| 6 | 4.048042000  | 2.090010000  | -0.309969000 |
| 6 | 3.852130000  | 0.601907000  | -0.198502000 |
| 1 | 2.085229000  | -1.742567000 | -0.018382000 |
| 1 | -0.340093000 | -1.511231000 | 0.054933000  |
| 1 | 0.005911000  | 2.811220000  | -0.318200000 |

|    |               |              |              |
|----|---------------|--------------|--------------|
| 6  | 4.940928000   | -0.324962000 | -0.172374000 |
| 6  | 6.265376000   | -0.163455000 | 0.240000000  |
| 6  | 4.819236000   | -1.734158000 | -0.682426000 |
| 6  | 6.969271000   | -1.421159000 | 0.014005000  |
| 6  | 6.994716000   | 0.903946000  | 0.862812000  |
| 6  | 8.274191000   | -1.610494000 | 0.337234000  |
| 6  | 8.300628000   | 0.726070000  | 1.197297000  |
| 1  | 6.503003000   | 1.850852000  | 1.031764000  |
| 6  | 9.011679000   | -0.521097000 | 0.950241000  |
| 1  | 8.776478000   | -2.554908000 | 0.155734000  |
| 1  | 8.854237000   | 1.535159000  | 1.664339000  |
| 8  | 3.851422000   | -2.311858000 | -1.157645000 |
| 8  | 5.082456000   | 2.738418000  | -0.380671000 |
| 7  | 6.078699000   | -2.317832000 | -0.549099000 |
| 7  | 2.774258000   | 2.661226000  | -0.356454000 |
| 6  | 2.545585000   | 4.085557000  | -0.478235000 |
| 1  | 1.983016000   | 4.315533000  | -1.389362000 |
| 1  | 1.997106000   | 4.471326000  | 0.388077000  |
| 1  | 3.523246000   | 4.565755000  | -0.528702000 |
| 6  | 6.372342000   | -3.676719000 | -0.952180000 |
| 1  | 7.150203000   | -3.696905000 | -1.722927000 |
| 1  | 6.701914000   | -4.276915000 | -0.097036000 |
| 1  | 5.452236000   | -4.099093000 | -1.357075000 |
| 6  | -1.781372000  | 0.769696000  | -0.113140000 |
| 6  | -2.570216000  | 1.942820000  | -0.203471000 |
| 16 | -2.845153000  | -0.637012000 | 0.045734000  |
| 6  | -3.928955000  | 1.730527000  | -0.148332000 |
| 1  | -2.134667000  | 2.928442000  | -0.308865000 |
| 6  | -4.296364000  | 0.366699000  | -0.010191000 |
| 1  | -4.667593000  | 2.521589000  | -0.204076000 |
| 6  | 10.321126000  | -0.652274000 | 1.293777000  |
| 6  | -5.581936000  | -0.163081000 | 0.074315000  |
| 6  | -5.957985000  | -1.528137000 | 0.212837000  |
| 16 | -7.058374000  | 0.805556000  | 0.024451000  |
| 1  | -5.228626000  | -2.331930000 | 0.267537000  |
| 6  | -8.004288000  | -0.697191000 | 0.192407000  |
| 6  | -9.393184000  | -0.707380000 | 0.233011000  |
| 6  | -10.127880000 | 0.505810000  | 0.140133000  |
| 7  | -10.701202000 | 1.518418000  | 0.061631000  |
| 6  | -10.111207000 | -1.928439000 | 0.368628000  |
| 7  | -10.729316000 | -2.909861000 | 0.479012000  |
| 7  | -7.239404000  | -1.816557000 | 0.275896000  |
| 1  | 10.867004000  | 0.163465000  | 1.755790000  |
| 1  | 10.865118000  | -1.574680000 | 1.118175000  |

S4TIIDS0-CS E=-2301.899461 Hartree

|    |              |              |              |
|----|--------------|--------------|--------------|
| 6  | 1.280030000  | 1.766986000  | -0.277839000 |
| 6  | 1.921258000  | 0.466257000  | -0.207383000 |
| 6  | 1.068078000  | -0.674043000 | -0.083973000 |
| 6  | -0.287614000 | -0.512185000 | -0.049167000 |
| 6  | -0.920984000 | 0.781133000  | -0.134056000 |
| 6  | -0.073239000 | 1.937059000  | -0.248869000 |
| 6  | 3.529636000  | 2.136606000  | -0.322528000 |
| 6  | 3.305083000  | 0.656740000  | -0.220654000 |
| 1  | 1.505307000  | -1.661610000 | -0.049188000 |
| 1  | -0.915156000 | -1.392935000 | 0.040094000  |
| 1  | -0.500908000 | 2.930531000  | -0.302777000 |
| 6  | 4.379441000  | -0.294860000 | -0.202638000 |
| 6  | 5.696135000  | -0.167748000 | 0.229811000  |
| 6  | 4.237787000  | -1.687256000 | -0.747544000 |
| 6  | 6.382806000  | -1.433770000 | -0.011148000 |
| 6  | 6.438530000  | 0.876631000  | 0.879955000  |
| 6  | 7.678047000  | -1.652926000 | 0.328136000  |
| 6  | 7.734738000  | 0.668578000  | 1.229392000  |
| 1  | 5.961346000  | 1.830182000  | 1.055337000  |
| 6  | 8.427627000  | -0.588644000 | 0.972780000  |
| 1  | 8.165834000  | -2.603226000 | 0.137055000  |
| 1  | 8.297503000  | 1.459401000  | 1.716709000  |
| 8  | 3.266496000  | -2.234668000 | -1.251554000 |
| 8  | 4.576139000  | 2.768196000  | -0.390544000 |
| 7  | 5.483508000  | -2.301369000 | -0.605442000 |
| 7  | 2.265481000  | 2.733201000  | -0.358129000 |
| 6  | 2.064594000  | 4.161377000  | -0.467217000 |
| 1  | 1.502690000  | 4.411446000  | -1.373850000 |
| 1  | 1.526925000  | 4.551949000  | 0.404131000  |
| 1  | 3.051884000  | 4.621909000  | -0.517592000 |
| 6  | 5.754799000  | -3.656661000 | -1.032053000 |
| 1  | 6.544770000  | -3.678775000 | -1.790684000 |
| 1  | 6.057765000  | -4.282482000 | -0.185189000 |
| 1  | 4.832278000  | -4.050187000 | -1.460302000 |
| 6  | -2.317165000 | 0.907742000  | -0.099839000 |
| 6  | -3.081426000 | 2.110458000  | -0.181407000 |
| 16 | -3.405024000 | -0.487290000 | 0.060599000  |
| 6  | -4.433832000 | 1.928395000  | -0.120031000 |
| 1  | -2.623677000 | 3.086208000  | -0.285575000 |
| 6  | -4.833869000 | 0.557962000  | 0.016078000  |
| 1  | -5.159494000 | 2.732125000  | -0.168247000 |

|    |              |              |              |
|----|--------------|--------------|--------------|
| 6  | 9.727911000  | -0.751242000 | 1.334013000  |
| 6  | -6.117968000 | 0.080634000  | 0.102767000  |
| 6  | -6.443267000 | -1.338887000 | 0.241499000  |
| 16 | -7.581129000 | 1.076201000  | 0.063147000  |
| 6  | -8.629648000 | -0.398053000 | 0.230795000  |
| 7  | -7.831820000 | -1.523662000 | 0.304649000  |
| 6  | -8.433372000 | -2.845476000 | 0.443248000  |
| 1  | -9.086145000 | -3.052605000 | -0.407683000 |
| 1  | -7.617583000 | -3.566789000 | 0.477761000  |
| 1  | -9.022665000 | -2.896291000 | 1.361577000  |
| 8  | -9.836718000 | -0.374894000 | 0.269651000  |
| 8  | -5.634172000 | -2.257639000 | 0.297312000  |
| 1  | 10.282145000 | 0.045515000  | 1.818739000  |
| 1  | 10.256785000 | -1.680926000 | 1.150502000  |

S5TIIDS0-CS E=-2073.363550 Hartree

|   |              |              |              |
|---|--------------|--------------|--------------|
| 6 | 1.662016000  | 1.785597000  | -0.267500000 |
| 6 | 2.303436000  | 0.485033000  | -0.204667000 |
| 6 | 1.451982000  | -0.657793000 | -0.093504000 |
| 6 | 0.095884000  | -0.498063000 | -0.063284000 |
| 6 | -0.536655000 | 0.795916000  | -0.141650000 |
| 6 | 0.307384000  | 1.953103000  | -0.243642000 |
| 6 | 3.907683000  | 2.164132000  | -0.297918000 |
| 6 | 3.687096000  | 0.677148000  | -0.208131000 |
| 1 | 1.890778000  | -1.644690000 | -0.063245000 |
| 1 | -0.531427000 | -1.379296000 | 0.016950000  |
| 1 | -0.122932000 | 2.945543000  | -0.291382000 |
| 6 | 4.763058000  | -0.268029000 | -0.196043000 |
| 6 | 6.082927000  | -0.136668000 | 0.233542000  |
| 6 | 4.624626000  | -1.660382000 | -0.743991000 |
| 6 | 6.771475000  | -1.399422000 | -0.016332000 |
| 6 | 6.821018000  | 0.905690000  | 0.889213000  |
| 6 | 8.069722000  | -1.614809000 | 0.315951000  |
| 6 | 8.120093000  | 0.700904000  | 1.232393000  |
| 1 | 6.340850000  | 1.855385000  | 1.075567000  |
| 6 | 8.815951000  | -0.550873000 | 0.963017000  |
| 1 | 8.560993000  | -2.561517000 | 0.116951000  |
| 1 | 8.680741000  | 1.490296000  | 1.724144000  |
| 8 | 3.653015000  | -2.208957000 | -1.244606000 |
| 8 | 4.953424000  | 2.794426000  | -0.358044000 |
| 7 | 5.873762000  | -2.267691000 | -0.611134000 |

|    |               |              |              |
|----|---------------|--------------|--------------|
| 7  | 2.643678000   | 2.756328000  | -0.334954000 |
| 6  | 2.437063000   | 4.185696000  | -0.434736000 |
| 1  | 1.878073000   | 4.438249000  | -1.342061000 |
| 1  | 1.894325000   | 4.566276000  | 0.437447000  |
| 1  | 3.421984000   | 4.651602000  | -0.477844000 |
| 6  | 6.150380000   | -3.620434000 | -1.045456000 |
| 1  | 6.936078000   | -3.633857000 | -1.808409000 |
| 1  | 6.461072000   | -4.247306000 | -0.202456000 |
| 1  | 5.228020000   | -4.017559000 | -1.470391000 |
| 6  | -1.937295000  | 0.921214000  | -0.112309000 |
| 6  | -2.700936000  | 2.116915000  | -0.189945000 |
| 16 | -3.020589000  | -0.477637000 | 0.036964000  |
| 6  | -4.056203000  | 1.920132000  | -0.133439000 |
| 1  | -2.254434000  | 3.098730000  | -0.287669000 |
| 6  | -4.445218000  | 0.551060000  | -0.006219000 |
| 1  | -4.774906000  | 2.728165000  | -0.180874000 |
| 6  | 10.119067000  | -0.708935000 | 1.317312000  |
| 6  | -5.755871000  | 0.057629000  | 0.076070000  |
| 6  | -6.892210000  | 0.907100000  | 0.039337000  |
| 6  | -5.969649000  | -1.392131000 | 0.206205000  |
| 6  | -8.167918000  | 0.414518000  | 0.121392000  |
| 1  | -6.761423000  | 1.979121000  | -0.056042000 |
| 6  | -8.431672000  | -1.029490000 | 0.252465000  |
| 6  | -9.293032000  | 1.288830000  | 0.082776000  |
| 7  | -10.182335000 | 2.039363000  | 0.047459000  |
| 8  | -5.035571000  | -2.196308000 | 0.246157000  |
| 8  | -9.557373000  | -1.499599000 | 0.328187000  |
| 7  | -7.284225000  | -1.846728000 | 0.285464000  |
| 6  | -7.467227000  | -3.296813000 | 0.414149000  |
| 1  | -7.022383000  | -3.803221000 | -0.444881000 |
| 1  | -6.969206000  | -3.653655000 | 1.318009000  |
| 1  | -8.535970000  | -3.489093000 | 0.462810000  |
| 1  | 10.671325000  | 0.087633000  | 1.804544000  |
| 1  | 10.651896000  | -1.634675000 | 1.125683000  |

**S6TIIDS0-CS** E=-2434.686688 Hartree

|   |              |              |              |
|---|--------------|--------------|--------------|
| 6 | 2.024017000  | 1.794470000  | -0.263638000 |
| 6 | 2.644069000  | 0.482027000  | -0.207503000 |
| 6 | 1.772814000  | -0.648102000 | -0.105710000 |
| 6 | 0.420574000  | -0.466105000 | -0.077227000 |
| 6 | -0.191725000 | 0.840283000  | -0.147984000 |
| 6 | 0.673501000  | 1.984690000  | -0.241219000 |

|    |              |              |              |
|----|--------------|--------------|--------------|
| 6  | 4.276356000  | 2.133154000  | -0.288206000 |
| 6  | 4.029021000  | 0.650384000  | -0.207529000 |
| 1  | 2.195515000  | -1.642227000 | -0.081340000 |
| 1  | -0.222401000 | -1.336494000 | -0.003966000 |
| 1  | 0.258988000  | 2.983966000  | -0.283789000 |
| 6  | 5.089146000  | -0.314786000 | -0.198064000 |
| 6  | 6.406352000  | -0.210905000 | 0.242632000  |
| 6  | 4.930486000  | -1.697929000 | -0.762206000 |
| 6  | 7.075765000  | -1.482907000 | -0.014816000 |
| 6  | 7.157595000  | 0.812818000  | 0.913708000  |
| 6  | 8.367235000  | -1.723573000 | 0.325439000  |
| 6  | 8.449921000  | 0.582502000  | 1.264620000  |
| 1  | 6.692125000  | 1.768929000  | 1.104942000  |
| 6  | 9.126714000  | -0.678826000 | 0.988933000  |
| 1  | 8.843994000  | -2.676551000 | 0.120956000  |
| 1  | 9.020412000  | 1.357494000  | 1.767894000  |
| 8  | 3.953263000  | -2.224070000 | -1.275972000 |
| 8  | 5.333655000  | 2.744836000  | -0.341828000 |
| 7  | 6.167801000  | -2.329157000 | -0.625491000 |
| 7  | 3.023177000  | 2.747970000  | -0.323628000 |
| 6  | 2.841825000  | 4.181258000  | -0.414429000 |
| 1  | 2.289844000  | 4.449701000  | -1.321501000 |
| 1  | 2.302952000  | 4.565365000  | 0.458610000  |
| 1  | 3.834891000  | 4.630130000  | -0.451533000 |
| 6  | 6.423546000  | -3.682070000 | -1.071213000 |
| 1  | 7.214689000  | -3.702327000 | -1.828449000 |
| 1  | 6.716630000  | -4.322916000 | -0.232363000 |
| 1  | 5.497427000  | -4.058296000 | -1.506947000 |
| 6  | -1.586626000 | 0.989273000  | -0.119782000 |
| 6  | -2.330814000 | 2.200351000  | -0.187836000 |
| 16 | -2.694250000 | -0.392294000 | 0.015565000  |
| 6  | -3.687900000 | 2.034645000  | -0.135435000 |
| 1  | -1.865162000 | 3.174412000  | -0.275888000 |
| 6  | -4.104731000 | 0.665740000  | -0.020501000 |
| 1  | -4.419406000 | 2.827081000  | -0.173346000 |
| 6  | 10.423719000 | -0.862803000 | 1.352000000  |
| 6  | -5.416319000 | 0.181274000  | 0.055910000  |
| 6  | -6.561294000 | 1.087521000  | 0.023358000  |
| 6  | -5.625816000 | -1.251763000 | 0.169804000  |
| 6  | -8.066061000 | -0.885073000 | 0.217087000  |
| 8  | -4.691825000 | -2.056257000 | 0.202420000  |
| 7  | -6.954754000 | -1.708820000 | 0.243852000  |
| 6  | -7.150634000 | -3.162321000 | 0.357472000  |
| 1  | -7.744009000 | -3.522161000 | -0.484228000 |

|    |              |              |              |
|----|--------------|--------------|--------------|
| 1  | -6.164777000 | -3.618622000 | 0.359194000  |
| 1  | -7.686825000 | -3.392295000 | 1.279280000  |
| 7  | -7.837637000 | 0.474862000  | 0.108531000  |
| 6  | -8.999596000 | 1.377227000  | 0.077174000  |
| 1  | -9.637884000 | 1.128440000  | -0.771867000 |
| 1  | -9.583473000 | 1.259766000  | 0.991212000  |
| 1  | -8.616301000 | 2.389502000  | -0.010083000 |
| 8  | -6.485601000 | 2.310251000  | -0.070091000 |
| 16 | -9.617491000 | -1.511537000 | 0.312440000  |
| 1  | 10.985701000 | -0.080640000 | 1.851318000  |
| 1  | 10.942042000 | -1.795779000 | 1.155676000  |

**S7TIIDS0-CS** E=-2188.615833 Hartree

|   |              |              |              |
|---|--------------|--------------|--------------|
| 6 | -2.164469000 | -1.862820000 | -0.451058000 |
| 6 | -2.754437000 | -0.547458000 | -0.278887000 |
| 6 | -1.857400000 | 0.559855000  | -0.162174000 |
| 6 | -0.508610000 | 0.354228000  | -0.219353000 |
| 6 | 0.070968000  | -0.954182000 | -0.399183000 |
| 6 | -0.818016000 | -2.076146000 | -0.516245000 |
| 6 | -4.420184000 | -2.165547000 | -0.366506000 |
| 6 | -4.141731000 | -0.694346000 | -0.209399000 |
| 1 | -2.258093000 | 1.558365000  | -0.062962000 |
| 1 | 0.153352000  | 1.210500000  | -0.144576000 |
| 1 | -0.425883000 | -3.078153000 | -0.636399000 |
| 6 | -5.181583000 | 0.282766000  | -0.079328000 |
| 6 | -6.476807000 | 0.169213000  | 0.422884000  |
| 6 | -5.027547000 | 1.698933000  | -0.557692000 |
| 6 | -7.134883000 | 1.465269000  | 0.285301000  |
| 6 | -7.210933000 | -0.884818000 | 1.064783000  |
| 6 | -8.402706000 | 1.702231000  | 0.707914000  |
| 6 | -8.479185000 | -0.658914000 | 1.497719000  |
| 1 | -6.754050000 | -1.858289000 | 1.168946000  |
| 6 | -9.146055000 | 0.627489000  | 1.340505000  |
| 1 | -8.871502000 | 2.673770000  | 0.591347000  |
| 1 | -9.036789000 | -1.456891000 | 1.979025000  |
| 8 | -4.068965000 | 2.244478000  | -1.085591000 |
| 8 | -5.489522000 | -2.757570000 | -0.397702000 |
| 7 | -6.244597000 | 2.337107000  | -0.314984000 |
| 7 | -3.182531000 | -2.795647000 | -0.511193000 |
| 6 | -3.033299000 | -4.222825000 | -0.702110000 |
| 1 | -2.537699000 | -4.440965000 | -1.654092000 |
| 1 | -2.454185000 | -4.670074000 | 0.113213000  |
| 1 | -4.035107000 | -4.653306000 | -0.711139000 |

|    |               |              |              |
|----|---------------|--------------|--------------|
| 6  | -6.498665000  | 3.720411000  | -0.656786000 |
| 1  | -7.326987000  | 3.802197000  | -1.368711000 |
| 1  | -6.736989000  | 4.307921000  | 0.236653000  |
| 1  | -5.589574000  | 4.111574000  | -1.114625000 |
| 6  | 1.463195000   | -1.134179000 | -0.445699000 |
| 6  | 2.185612000   | -2.338128000 | -0.677011000 |
| 16 | 2.602793000   | 0.196543000  | -0.219637000 |
| 6  | 3.547070000   | -2.199882000 | -0.664917000 |
| 1  | 1.693493000   | -3.284896000 | -0.861647000 |
| 6  | 3.998549000   | -0.858660000 | -0.424280000 |
| 1  | 4.259756000   | -2.998508000 | -0.811853000 |
| 6  | -10.419417000 | 0.806171000  | 1.782117000  |
| 6  | 5.332055000   | -0.488042000 | -0.238780000 |
| 6  | 6.378115000   | -1.522220000 | 0.051757000  |
| 6  | 5.940203000   | 0.812727000  | -0.027987000 |
| 6  | 7.518381000   | -0.787749000 | 0.652230000  |
| 6  | 7.244427000   | 0.591349000  | 0.657888000  |
| 6  | 8.693628000   | -1.316867000 | 1.166013000  |
| 6  | 8.176526000   | 1.469996000  | 1.216664000  |
| 6  | 9.621816000   | -0.434835000 | 1.724723000  |
| 1  | 8.865636000   | -2.387749000 | 1.128224000  |
| 6  | 9.356117000   | 0.938580000  | 1.751440000  |
| 1  | 8.007415000   | 2.537492000  | 1.254299000  |
| 1  | 10.550089000  | -0.812491000 | 2.142305000  |
| 1  | 10.080551000  | 1.614357000  | 2.195787000  |
| 8  | 6.324550000   | -2.733370000 | -0.116652000 |
| 6  | 5.509444000   | 2.042632000  | -0.508155000 |
| 6  | 4.508941000   | 2.196759000  | -1.513135000 |
| 7  | 3.741597000   | 2.371083000  | -2.372914000 |
| 6  | 6.138346000   | 3.275469000  | -0.153484000 |
| 7  | 6.613792000   | 4.300991000  | 0.130380000  |
| 1  | -10.969174000 | 0.001039000  | 2.257987000  |
| 1  | -10.930107000 | 1.757598000  | 1.674324000  |

**S8TIIDS0-CS** E=-2623.835400 Hartree

|   |              |              |              |
|---|--------------|--------------|--------------|
| 6 | -7.536506000 | 1.426927000  | 0.282808000  |
| 6 | -6.854441000 | 0.144892000  | 0.432847000  |
| 6 | -7.567134000 | -0.915727000 | 1.087282000  |
| 6 | -8.839149000 | -0.709279000 | 1.519434000  |
| 6 | -9.530205000 | 0.562250000  | 1.348725000  |
| 6 | -8.808398000 | 1.644208000  | 0.704172000  |
| 6 | -5.434702000 | 1.692528000  | -0.564262000 |
| 6 | -5.561653000 | 0.277990000  | -0.072688000 |



|    |               |              |              |
|----|---------------|--------------|--------------|
| 1  | -7.091781000  | -1.879046000 | 1.201987000  |
| 1  | -9.380802000  | -1.512350000 | 2.010309000  |
| 1  | -9.295739000  | 2.605294000  | 0.577741000  |
| 6  | -4.504497000  | -0.680233000 | -0.195452000 |
| 6  | -3.120385000  | -0.508935000 | -0.272891000 |
| 6  | -4.756014000  | -2.159316000 | -0.335499000 |
| 6  | -2.507420000  | -1.815143000 | -0.433109000 |
| 6  | -2.243583000  | 0.615886000  | -0.172176000 |
| 6  | -1.157418000  | -2.004511000 | -0.502459000 |
| 6  | -0.891529000  | 0.434276000  | -0.233263000 |
| 1  | -2.662227000  | 1.607797000  | -0.081598000 |
| 6  | -0.289445000  | -0.865156000 | -0.401958000 |
| 1  | -0.747509000  | -3.000420000 | -0.613097000 |
| 1  | -0.245413000  | 1.303489000  | -0.169784000 |
| 8  | -5.814420000  | -2.770300000 | -0.356011000 |
| 8  | -4.486790000  | 2.250951000  | -1.097750000 |
| 7  | -3.507769000  | -2.767557000 | -0.478322000 |
| 7  | -6.663535000  | 2.309323000  | -0.327273000 |
| 6  | -6.944477000  | 3.684213000  | -0.682610000 |
| 1  | -7.773395000  | 3.742679000  | -1.396068000 |
| 1  | -7.195250000  | 4.275137000  | 0.205084000  |
| 1  | -6.042835000  | 4.088884000  | -1.143357000 |
| 6  | -3.332151000  | -4.194091000 | -0.654143000 |
| 1  | -2.837570000  | -4.413051000 | -1.606365000 |
| 1  | -2.740384000  | -4.620505000 | 0.163106000  |
| 1  | -4.325429000  | -4.643874000 | -0.652954000 |
| 6  | -10.806519000 | 0.721145000  | 1.789643000  |
| 6  | 1.105883000   | -1.020068000 | -0.453829000 |
| 6  | 1.848801000   | -2.211627000 | -0.677617000 |
| 16 | 2.219797000   | 0.336431000  | -0.250160000 |
| 6  | 3.206890000   | -2.046781000 | -0.676559000 |
| 1  | 1.375557000   | -3.170121000 | -0.848743000 |
| 6  | 3.633636000   | -0.695215000 | -0.449474000 |
| 1  | 3.910417000   | -2.852996000 | -0.832750000 |
| 6  | 4.951686000   | -0.288753000 | -0.276323000 |
| 6  | 5.557319000   | 0.997192000  | -0.076441000 |
| 6  | 7.296810000   | -0.433934000 | 0.798882000  |
| 6  | 6.828007000   | 0.884319000  | 0.695439000  |
| 6  | 8.472630000   | -0.786455000 | 1.441677000  |
| 6  | 7.592358000   | 1.891819000  | 1.302832000  |
| 6  | 9.220133000   | 0.232234000  | 2.035549000  |
| 1  | 8.789371000   | -1.823007000 | 1.487438000  |
| 6  | 8.773573000   | 1.554342000  | 1.966186000  |
| 1  | 7.278254000   | 2.925438000  | 1.278646000  |

|    |               |              |              |
|----|---------------|--------------|--------------|
| 1  | 10.142740000  | -0.005302000 | 2.555280000  |
| 1  | 9.351788000   | 2.342032000  | 2.438725000  |
| 6  | 5.083951000   | 2.188842000  | -0.629324000 |
| 6  | 5.590726000   | 3.480119000  | -0.297328000 |
| 7  | 5.960551000   | 4.556346000  | -0.043552000 |
| 6  | 4.135869000   | 2.221928000  | -1.692261000 |
| 7  | 3.397515000   | 2.291106000  | -2.591838000 |
| 16 | 6.199695000   | -1.582333000 | -0.005900000 |
| 8  | 5.724314000   | -2.590951000 | 0.955004000  |
| 8  | 6.760764000   | -2.046142000 | -1.285152000 |
| 1  | -11.340336000 | -0.089291000 | 2.274550000  |
| 1  | -11.335506000 | 1.661346000  | 1.672125000  |

**S9TIIDS0-CS** E=-2609.776026 Hartree

|   |              |              |              |
|---|--------------|--------------|--------------|
| 6 | 6.890318000  | -1.516315000 | 0.002654000  |
| 6 | 6.223962000  | -0.239227000 | 0.239771000  |
| 6 | 6.986097000  | 0.791735000  | 0.890322000  |
| 6 | 8.275793000  | 0.559082000  | 1.247330000  |
| 6 | 8.947122000  | -0.712242000 | 0.998812000  |
| 6 | 8.178448000  | -1.761336000 | 0.349919000  |
| 6 | 4.744993000  | -1.728561000 | -0.746938000 |
| 6 | 4.907767000  | -0.340225000 | -0.197514000 |
| 1 | 6.526389000  | 1.755509000  | 1.057884000  |
| 1 | 8.851693000  | 1.340625000  | 1.734723000  |
| 1 | 8.647685000  | -2.721939000 | 0.162744000  |
| 6 | 3.849683000  | 0.632242000  | -0.218693000 |
| 6 | 2.459159000  | 0.462020000  | -0.209136000 |
| 6 | 4.098453000  | 2.100698000  | -0.309233000 |
| 6 | 1.838657000  | 1.771557000  | -0.273722000 |
| 6 | 1.586961000  | -0.661933000 | -0.095337000 |
| 6 | 0.487404000  | 1.964290000  | -0.247606000 |
| 6 | 0.231826000  | -0.477212000 | -0.064620000 |
| 1 | 2.006287000  | -1.657474000 | -0.065758000 |
| 6 | -0.379859000 | 0.822734000  | -0.143302000 |
| 1 | 0.077153000  | 2.965749000  | -0.297284000 |
| 1 | -0.409092000 | -1.350081000 | 0.016695000  |
| 8 | 5.153543000  | 2.724022000  | -0.368784000 |
| 8 | 3.768280000  | -2.260104000 | -1.259633000 |
| 7 | 2.841653000  | 2.719896000  | -0.345577000 |
| 7 | 5.977732000  | -2.367765000 | -0.596672000 |
| 6 | 6.225191000  | -3.726605000 | -1.022222000 |
| 1 | 7.021264000  | -3.764947000 | -1.774224000 |
| 1 | 6.509005000  | -4.360601000 | -0.174386000 |

|    |               |              |              |
|----|---------------|--------------|--------------|
| 1  | 5.298275000   | -4.100654000 | -1.458759000 |
| 6  | 2.668043000   | 4.150556000  | -0.445263000 |
| 1  | 2.114220000   | 4.419713000  | -1.352013000 |
| 1  | 2.134241000   | 4.547228000  | 0.426355000  |
| 1  | 3.664899000   | 4.591344000  | -0.488512000 |
| 6  | 10.241518000  | -0.901803000 | 1.368196000  |
| 6  | -1.773705000  | 0.977853000  | -0.115267000 |
| 6  | -2.529941000  | 2.185942000  | -0.188916000 |
| 16 | -2.888954000  | -0.397258000 | 0.026746000  |
| 6  | -3.886940000  | 2.025238000  | -0.135562000 |
| 1  | -2.055971000  | 3.154754000  | -0.281933000 |
| 6  | -4.315178000  | 0.665467000  | -0.014566000 |
| 1  | -4.591405000  | 2.848362000  | -0.180704000 |
| 6  | -5.599747000  | 0.193421000  | 0.061385000  |
| 16 | -5.982530000  | -1.524043000 | 0.209489000  |
| 16 | -7.010140000  | 1.264490000  | 0.018667000  |
| 6  | -7.740086000  | -1.328107000 | 0.244214000  |
| 6  | -8.223881000  | -0.014477000 | 0.154229000  |
| 6  | -8.628096000  | -2.400532000 | 0.354340000  |
| 6  | -9.598483000  | 0.232848000  | 0.173930000  |
| 6  | -9.999343000  | -2.149322000 | 0.373680000  |
| 1  | -8.252743000  | -3.416500000 | 0.423740000  |
| 6  | -10.481440000 | -0.840539000 | 0.283995000  |
| 1  | -9.972784000  | 1.249193000  | 0.104176000  |
| 1  | -10.692810000 | -2.979591000 | 0.459022000  |
| 1  | -11.550100000 | -0.652593000 | 0.299579000  |
| 1  | 10.809466000  | -0.116273000 | 1.855457000  |
| 1  | 10.751852000  | -1.842608000 | 1.188577000  |

**S10TIIDS0-CS** E=-2456.117306 Hartree

|   |              |              |              |
|---|--------------|--------------|--------------|
| 6 | 0.733230000  | 1.671215000  | -0.295274000 |
| 6 | 1.425272000  | 0.399839000  | -0.204893000 |
| 6 | 0.617479000  | -0.766329000 | -0.050738000 |
| 6 | -0.745530000 | -0.654948000 | -0.007191000 |
| 6 | -1.428270000 | 0.606866000  | -0.111402000 |
| 6 | -0.626357000 | 1.790632000  | -0.256487000 |
| 6 | 2.971153000  | 2.122133000  | -0.368367000 |
| 6 | 2.804498000  | 0.645502000  | -0.236801000 |
| 1 | 1.090973000  | -1.736441000 | -0.000807000 |
| 1 | -1.336467000 | -1.559123000 | 0.105123000  |
| 1 | -1.091414000 | 2.766598000  | -0.326959000 |
| 6 | 3.914406000  | -0.266862000 | -0.203985000 |
| 6 | 5.228265000  | -0.082505000 | 0.212887000  |

|    |               |              |              |
|----|---------------|--------------|--------------|
| 6  | 3.821630000   | -1.676469000 | -0.714330000 |
| 6  | 5.960789000   | -1.327242000 | 0.000833000  |
| 6  | 5.940480000   | 1.005642000  | 0.825734000  |
| 6  | 7.264407000   | -1.492372000 | 0.337352000  |
| 6  | 7.245115000   | 0.853291000  | 1.171723000  |
| 1  | 5.430655000   | 1.947177000  | 0.973666000  |
| 6  | 7.982163000   | -0.385844000 | 0.948071000  |
| 1  | 7.783194000   | -2.430800000 | 0.169402000  |
| 1  | 7.783026000   | 1.678009000  | 1.630557000  |
| 8  | 2.869721000   | -2.274280000 | -1.200072000 |
| 8  | 3.989545000   | 2.800759000  | -0.457369000 |
| 7  | 5.089257000   | -2.243171000 | -0.563581000 |
| 7  | 1.681743000   | 2.670592000  | -0.404798000 |
| 6  | 1.428706000   | 4.086390000  | -0.539494000 |
| 1  | 0.849515000   | 4.300373000  | -1.445111000 |
| 1  | 0.884989000   | 4.476910000  | 0.328799000  |
| 1  | 2.399290000   | 4.579476000  | -0.608345000 |
| 6  | 5.405898000   | -3.597515000 | -0.956180000 |
| 1  | 6.194199000   | -3.612826000 | -1.717145000 |
| 1  | 5.733784000   | -4.191908000 | -0.095630000 |
| 1  | 4.495904000   | -4.033187000 | -1.370620000 |
| 6  | -2.828620000  | 0.686623000  | -0.069185000 |
| 6  | -3.651269000  | 1.848192000  | -0.162926000 |
| 16 | -3.864736000  | -0.743695000 | 0.121492000  |
| 6  | -4.997288000  | 1.613787000  | -0.087809000 |
| 1  | -3.233115000  | 2.839084000  | -0.285980000 |
| 6  | -5.347387000  | 0.237180000  | 0.072277000  |
| 1  | -5.746848000  | 2.395492000  | -0.144073000 |
| 6  | 9.289300000   | -0.494625000 | 1.305092000  |
| 6  | -6.603092000  | -0.305391000 | 0.176618000  |
| 16 | -6.898262000  | -2.039278000 | 0.372461000  |
| 16 | -8.083865000  | 0.670943000  | 0.127130000  |
| 6  | -8.649515000  | -1.908278000 | 0.422089000  |
| 6  | -9.183660000  | -0.685832000 | 0.311401000  |
| 1  | -10.243943000 | -0.466130000 | 0.326441000  |
| 1  | -9.213199000  | -2.825271000 | 0.540029000  |
| 1  | 9.819110000   | 0.333572000  | 1.763826000  |
| 1  | 9.848209000   | -1.410790000 | 1.143593000  |

**S1TIIDS0-OS** E=-1768.020964 Hartree

|   |              |              |              |
|---|--------------|--------------|--------------|
| 6 | -5.295350000 | -1.194354000 | 0.016060000  |
| 6 | -4.532365000 | 0.027737000  | -0.172793000 |
| 6 | -5.222518000 | 1.161497000  | -0.704384000 |

|    |              |              |              |
|----|--------------|--------------|--------------|
| 6  | -6.553915000 | 1.075183000  | -0.990473000 |
| 6  | -7.321642000 | -0.137527000 | -0.777170000 |
| 6  | -6.624714000 | -1.294399000 | -0.257891000 |
| 6  | -3.142576000 | -1.682108000 | 0.595350000  |
| 6  | -3.191633000 | -0.236282000 | 0.169748000  |
| 1  | -4.685713000 | 2.087554000  | -0.847481000 |
| 1  | -7.076295000 | 1.939340000  | -1.389919000 |
| 1  | -7.170090000 | -2.219559000 | -0.103678000 |
| 6  | -2.052182000 | 0.610711000  | 0.197014000  |
| 6  | -0.667093000 | 0.308105000  | 0.165831000  |
| 6  | -2.145786000 | 2.108090000  | 0.333718000  |
| 6  | 0.062690000  | 1.547822000  | 0.258859000  |
| 6  | 0.091802000  | -0.879697000 | -0.003170000 |
| 6  | 1.431442000  | 1.619995000  | 0.216554000  |
| 6  | 1.464290000  | -0.817589000 | -0.052663000 |
| 1  | -0.414385000 | -1.831749000 | -0.063897000 |
| 6  | 2.181927000  | 0.414631000  | 0.061182000  |
| 1  | 1.930739000  | 2.577994000  | 0.290903000  |
| 1  | 2.019746000  | -1.741593000 | -0.176576000 |
| 8  | -3.132409000 | 2.824904000  | 0.434487000  |
| 8  | -2.198462000 | -2.346037000 | 0.999745000  |
| 7  | -0.838863000 | 2.591554000  | 0.373701000  |
| 7  | -4.439777000 | -2.175706000 | 0.488568000  |
| 6  | -4.803919000 | -3.534297000 | 0.830473000  |
| 1  | -5.550511000 | -3.548903000 | 1.631679000  |
| 1  | -5.205478000 | -4.063454000 | -0.040656000 |
| 1  | -3.897870000 | -4.035480000 | 1.172051000  |
| 6  | -0.515062000 | 3.994935000  | 0.518385000  |
| 1  | 0.075267000  | 4.169104000  | 1.424379000  |
| 1  | 0.045291000  | 4.360662000  | -0.349112000 |
| 1  | -1.457857000 | 4.537446000  | 0.593487000  |
| 6  | -8.657271000 | -0.179263000 | -1.067473000 |
| 6  | 3.601951000  | 0.447495000  | 0.015551000  |
| 6  | 4.454799000  | 1.570366000  | 0.123407000  |
| 16 | 4.572951000  | -1.017104000 | -0.199388000 |
| 6  | 5.799889000  | 1.282520000  | 0.039500000  |
| 1  | 4.078170000  | 2.575943000  | 0.263076000  |
| 6  | 6.071376000  | -0.101025000 | -0.141309000 |
| 1  | 6.594968000  | 2.015497000  | 0.101917000  |
| 6  | 7.328734000  | -0.700351000 | -0.261983000 |
| 6  | 8.504098000  | 0.098338000  | -0.206879000 |
| 7  | 9.451774000  | 0.776317000  | -0.158547000 |
| 6  | 7.473251000  | -2.101818000 | -0.441642000 |
| 7  | 7.565557000  | -3.255291000 | -0.589019000 |

|   |              |              |              |
|---|--------------|--------------|--------------|
| 1 | -9.174935000 | 0.688956000  | -1.460995000 |
| 1 | -9.243485000 | -1.079441000 | -0.914549000 |

**S2TIIDS0-OS** E=-1850.505066 Hartree

|    |              |              |              |
|----|--------------|--------------|--------------|
| 6  | 0.750942000  | 1.654371000  | -0.240204000 |
| 6  | 1.396516000  | 0.376384000  | -0.180892000 |
| 6  | 0.564828000  | -0.758995000 | -0.068684000 |
| 6  | -0.809745000 | -0.610940000 | -0.041652000 |
| 6  | -1.439385000 | 0.658872000  | -0.122920000 |
| 6  | -0.616818000 | 1.812659000  | -0.219038000 |
| 6  | 2.990106000  | 2.094973000  | -0.245459000 |
| 6  | 2.814771000  | 0.600877000  | -0.171583000 |
| 1  | 1.005786000  | -1.743767000 | -0.032549000 |
| 1  | -1.422690000 | -1.503467000 | 0.032714000  |
| 1  | -1.051892000 | 2.803717000  | -0.260108000 |
| 6  | 3.898401000  | -0.301481000 | -0.149743000 |
| 6  | 5.267259000  | -0.117273000 | 0.183766000  |
| 6  | 3.766876000  | -1.748162000 | -0.568320000 |
| 6  | 5.948943000  | -1.380189000 | -0.005488000 |
| 6  | 6.031009000  | 0.966443000  | 0.706997000  |
| 6  | 7.273334000  | -1.566608000 | 0.260786000  |
| 6  | 7.360066000  | 0.795814000  | 0.986660000  |
| 1  | 5.556386000  | 1.925146000  | 0.852749000  |
| 6  | 8.045942000  | -0.459439000 | 0.772146000  |
| 1  | 7.754565000  | -2.526512000 | 0.105039000  |
| 1  | 7.936687000  | 1.627398000  | 1.380768000  |
| 8  | 2.787281000  | -2.362632000 | -0.967362000 |
| 8  | 4.013815000  | 2.765901000  | -0.300481000 |
| 7  | 5.033108000  | -2.312817000 | -0.468783000 |
| 7  | 1.713846000  | 2.649665000  | -0.295694000 |
| 6  | 1.471330000  | 4.072487000  | -0.393398000 |
| 1  | 0.910892000  | 4.312938000  | -1.303468000 |
| 1  | 0.912395000  | 4.437420000  | 0.475644000  |
| 1  | 2.444079000  | 4.563765000  | -0.429052000 |
| 6  | 5.317155000  | -3.690377000 | -0.808190000 |
| 1  | 6.057951000  | -3.749796000 | -1.612870000 |
| 1  | 5.693224000  | -4.239275000 | 0.062279000  |
| 1  | 4.382316000  | -4.140176000 | -1.143613000 |
| 6  | -2.874704000 | 0.789162000  | -0.104098000 |
| 6  | -3.644441000 | 1.948570000  | -0.240913000 |
| 16 | -3.935207000 | -0.596847000 | 0.110915000  |
| 6  | -5.020498000 | 1.736860000  | -0.178269000 |
| 1  | -3.208563000 | 2.928253000  | -0.392621000 |

|   |               |              |              |
|---|---------------|--------------|--------------|
| 6 | -5.389723000  | 0.395697000  | 0.011559000  |
| 1 | -5.743538000  | 2.537087000  | -0.272950000 |
| 6 | 9.383983000   | -0.589013000 | 1.054169000  |
| 6 | -6.697891000  | -0.158447000 | 0.118702000  |
| 6 | -6.907279000  | -1.565368000 | 0.298315000  |
| 6 | -7.859634000  | 0.682613000  | 0.050418000  |
| 6 | -8.158968000  | -2.097167000 | 0.402185000  |
| 1 | -6.043512000  | -2.222774000 | 0.351131000  |
| 6 | -9.119294000  | 0.170976000  | 0.152178000  |
| 1 | -7.730228000  | 1.751577000  | -0.083840000 |
| 6 | -9.355391000  | -1.259752000 | 0.335988000  |
| 1 | -8.313583000  | -3.162867000 | 0.537269000  |
| 1 | -9.995999000  | 0.808787000  | 0.100943000  |
| 8 | -10.501529000 | -1.735186000 | 0.430179000  |
| 1 | 9.959569000   | 0.244289000  | 1.442464000  |
| 1 | 9.908117000   | -1.526071000 | 0.897973000  |

**S3TIIDS0-OS** E=-2335.876101 Hartree

|   |              |              |              |
|---|--------------|--------------|--------------|
| 6 | -1.811897000 | 1.641766000  | 0.223633000  |
| 6 | -2.454493000 | 0.361897000  | 0.183705000  |
| 6 | -1.622056000 | -0.774711000 | 0.102951000  |
| 6 | -0.246865000 | -0.625919000 | 0.087954000  |
| 6 | 0.378869000  | 0.645746000  | 0.150772000  |
| 6 | -0.443484000 | 1.800806000  | 0.214142000  |
| 6 | -4.050259000 | 2.081746000  | 0.193608000  |
| 6 | -3.874273000 | 0.584795000  | 0.154112000  |
| 1 | -2.061954000 | -1.760300000 | 0.082612000  |
| 1 | 0.366960000  | -1.519883000 | 0.042498000  |
| 1 | -0.009235000 | 2.792785000  | 0.234684000  |
| 6 | -4.955696000 | -0.317372000 | 0.141446000  |
| 6 | -6.324323000 | -0.140026000 | -0.202824000 |
| 6 | -4.825967000 | -1.757643000 | 0.586316000  |
| 6 | -7.004924000 | -1.399863000 | 0.006955000  |
| 6 | -7.084817000 | 0.932813000  | -0.750841000 |
| 6 | -8.328230000 | -1.592085000 | -0.261806000 |
| 6 | -8.412846000 | 0.756013000  | -1.033626000 |
| 1 | -6.610202000 | 1.888616000  | -0.913670000 |
| 6 | -9.097943000 | -0.495075000 | -0.797523000 |
| 1 | -8.809956000 | -2.548879000 | -0.089967000 |
| 1 | -8.987842000 | 1.579263000  | -1.446866000 |
| 8 | -3.847572000 | -2.363452000 | 1.000179000  |
| 8 | -5.074441000 | 2.752116000  | 0.222806000  |
| 7 | -6.091122000 | -2.323394000 | 0.491897000  |

|    |               |              |              |
|----|---------------|--------------|--------------|
| 7  | -2.774910000  | 2.637414000  | 0.246672000  |
| 6  | -2.533198000  | 4.062752000  | 0.316862000  |
| 1  | -1.983413000  | 4.321909000  | 1.228094000  |
| 1  | -1.964737000  | 4.408571000  | -0.553600000 |
| 1  | -3.505993000  | 4.554811000  | 0.331075000  |
| 6  | -6.377253000  | -3.695065000 | 0.855222000  |
| 1  | -7.122137000  | -3.738897000 | 1.656914000  |
| 1  | -6.748619000  | -4.259249000 | -0.007278000 |
| 1  | -5.444529000  | -4.138996000 | 1.203801000  |
| 6  | 1.815688000   | 0.777779000  | 0.145620000  |
| 6  | 2.582659000   | 1.933665000  | 0.311265000  |
| 16 | 2.873851000   | -0.607909000 | -0.089615000 |
| 6  | 3.961068000   | 1.722841000  | 0.256903000  |
| 1  | 2.144782000   | 2.908899000  | 0.482525000  |
| 6  | 4.320292000   | 0.386764000  | 0.044693000  |
| 1  | 4.694932000   | 2.512077000  | 0.373516000  |
| 6  | -10.435065000 | -0.630434000 | -1.083155000 |
| 6  | 5.618601000   | -0.163919000 | -0.061259000 |
| 6  | 5.982035000   | -1.513634000 | -0.258088000 |
| 16 | 7.087103000   | 0.795012000  | 0.038996000  |
| 1  | 5.253680000   | -2.313424000 | -0.351760000 |
| 6  | 8.031784000   | -0.697950000 | -0.190567000 |
| 6  | 9.431833000   | -0.701899000 | -0.222863000 |
| 6  | 10.164775000  | 0.504144000  | -0.070618000 |
| 7  | 10.740568000  | 1.510810000  | 0.057141000  |
| 6  | 10.150345000  | -1.913393000 | -0.409290000 |
| 7  | 10.769181000  | -2.889506000 | -0.560531000 |
| 7  | 7.275092000   | -1.802199000 | -0.327637000 |
| 1  | -11.008982000 | 0.195115000  | -1.489995000 |
| 1  | -10.959716000 | -1.564479000 | -0.911549000 |

**S4TIIDS0-OS** E=-2301.900692 Hartree

|   |              |              |              |
|---|--------------|--------------|--------------|
| 6 | 1.282830000  | 1.737802000  | -0.250921000 |
| 6 | 1.911456000  | 0.443796000  | -0.192564000 |
| 6 | 1.058461000  | -0.683720000 | -0.078862000 |
| 6 | -0.307088000 | -0.514846000 | -0.046943000 |
| 6 | -0.923886000 | 0.771708000  | -0.125454000 |
| 6 | -0.077384000 | 1.916642000  | -0.225759000 |
| 6 | 3.530807000  | 2.125632000  | -0.270031000 |
| 6 | 3.319162000  | 0.638908000  | -0.190808000 |
| 1 | 1.486237000  | -1.674823000 | -0.046001000 |
| 1 | -0.935453000 | -1.395813000 | 0.033866000  |
| 1 | -0.497184000 | 2.913975000  | -0.271006000 |



|    |              |              |              |
|----|--------------|--------------|--------------|
| 6  | 4.388663000  | -0.294863000 | -0.173407000 |
| 6  | 5.740454000  | -0.148655000 | 0.198947000  |
| 6  | 4.235425000  | -1.718497000 | -0.645900000 |
| 6  | 6.408613000  | -1.420353000 | -0.014023000 |
| 6  | 6.509322000  | 0.909647000  | 0.775568000  |
| 6  | 7.720094000  | -1.635269000 | 0.280569000  |
| 6  | 7.824015000  | 0.708569000  | 1.082633000  |
| 1  | 6.045302000  | 1.871612000  | 0.936013000  |
| 6  | 8.497572000  | -0.554701000 | 0.847518000  |
| 1  | 8.192187000  | -2.596893000 | 0.107980000  |
| 1  | 8.405308000  | 1.516858000  | 1.516481000  |
| 8  | 3.251786000  | -2.294978000 | -1.089494000 |
| 8  | 4.571237000  | 2.769701000  | -0.328501000 |
| 7  | 5.487630000  | -2.316819000 | -0.531426000 |
| 7  | 2.265981000  | 2.711167000  | -0.313068000 |
| 6  | 2.055866000  | 4.138967000  | -0.410448000 |
| 1  | 1.498024000  | 4.392624000  | -1.318571000 |
| 1  | 1.508914000  | 4.517289000  | 0.460530000  |
| 1  | 3.039780000  | 4.607398000  | -0.449813000 |
| 6  | 5.749964000  | -3.688435000 | -0.909291000 |
| 1  | 6.509496000  | -3.739136000 | -1.697003000 |
| 1  | 6.090957000  | -4.274586000 | -0.048654000 |
| 1  | 4.814018000  | -4.105038000 | -1.282692000 |
| 6  | -2.341424000 | 0.914792000  | -0.098615000 |
| 6  | -3.090370000 | 2.110155000  | -0.185848000 |
| 16 | -3.425891000 | -0.473628000 | 0.059067000  |
| 6  | -4.455240000 | 1.930371000  | -0.130381000 |
| 1  | -2.630756000 | 3.084987000  | -0.290946000 |
| 6  | -4.852795000 | 0.570480000  | 0.005410000  |
| 1  | -5.176909000 | 2.737348000  | -0.184531000 |
| 6  | 9.820178000  | -0.713187000 | 1.160456000  |
| 6  | -6.144481000 | 0.084732000  | 0.087906000  |
| 6  | -6.471667000 | -1.332346000 | 0.227343000  |
| 16 | -7.601903000 | 1.082123000  | 0.039531000  |
| 6  | -8.657113000 | -0.389972000 | 0.204766000  |
| 7  | -7.862173000 | -1.515600000 | 0.284253000  |
| 6  | -8.465466000 | -2.836681000 | 0.422299000  |
| 1  | -9.113687000 | -3.045331000 | -0.431755000 |
| 1  | -7.650303000 | -3.558412000 | 0.462686000  |
| 1  | -9.059650000 | -2.885340000 | 1.337596000  |
| 8  | -9.864255000 | -0.361697000 | 0.237444000  |
| 8  | -5.665055000 | -2.253431000 | 0.288684000  |
| 1  | 10.397945000 | 0.098470000  | 1.589475000  |
| 1  | 10.334880000 | -1.653169000 | 0.990440000  |

S5TIIDS0-OS E=-2073.364569 Hartree

|    |              |              |              |
|----|--------------|--------------|--------------|
| 6  | 1.664436000  | 1.758961000  | -0.243574000 |
| 6  | 2.296390000  | 0.465053000  | -0.192039000 |
| 6  | 1.447007000  | -0.667476000 | -0.088476000 |
| 6  | 0.081900000  | -0.503453000 | -0.059993000 |
| 6  | -0.538196000 | 0.783432000  | -0.132389000 |
| 6  | 0.303801000  | 1.932449000  | -0.222198000 |
| 6  | 3.909342000  | 2.154408000  | -0.252601000 |
| 6  | 3.701409000  | 0.663142000  | -0.183928000 |
| 1  | 1.878711000  | -1.656976000 | -0.060494000 |
| 1  | -0.544599000 | -1.385991000 | 0.013147000  |
| 1  | -0.120549000 | 2.927912000  | -0.262120000 |
| 6  | 4.773285000  | -0.266835000 | -0.172301000 |
| 6  | 6.123130000  | -0.118977000 | 0.205778000  |
| 6  | 4.625965000  | -1.686462000 | -0.659851000 |
| 6  | 6.796171000  | -1.386407000 | -0.020424000 |
| 6  | 6.884159000  | 0.936231000  | 0.798058000  |
| 6  | 8.108105000  | -1.598085000 | 0.274114000  |
| 6  | 8.198925000  | 0.737672000  | 1.105451000  |
| 1  | 6.415334000  | 1.893650000  | 0.970446000  |
| 6  | 8.878038000  | -0.519767000 | 0.855233000  |
| 1  | 8.585876000  | -2.554818000 | 0.091056000  |
| 1  | 8.775498000  | 1.542697000  | 1.551202000  |
| 8  | 3.644463000  | -2.260102000 | -1.110240000 |
| 8  | 4.948877000  | 2.797956000  | -0.303672000 |
| 7  | 5.880302000  | -2.280222000 | -0.550060000 |
| 7  | 2.643753000  | 2.736062000  | -0.295667000 |
| 6  | 2.428442000  | 4.164671000  | -0.384583000 |
| 1  | 1.872677000  | 4.420955000  | -1.292926000 |
| 1  | 1.877725000  | 4.534290000  | 0.487423000  |
| 1  | 3.410303000  | 4.637576000  | -0.418035000 |
| 6  | 6.149583000  | -3.647116000 | -0.942869000 |
| 1  | 6.909925000  | -3.684889000 | -1.730274000 |
| 1  | 6.492032000  | -4.240339000 | -0.087911000 |
| 1  | 5.216213000  | -4.064213000 | -1.321856000 |
| 6  | -1.956409000 | 0.920961000  | -0.108914000 |
| 6  | -2.707698000 | 2.112707000  | -0.192037000 |
| 16 | -3.036446000 | -0.471084000 | 0.038831000  |
| 6  | -4.071939000 | 1.918747000  | -0.140313000 |
| 1  | -2.258353000 | 3.092994000  | -0.291284000 |
| 6  | -4.461622000 | 0.558053000  | -0.012310000 |
| 1  | -4.786606000 | 2.730227000  | -0.193172000 |

|   |               |              |              |
|---|---------------|--------------|--------------|
| 6 | 10.200279000  | -0.674461000 | 1.168810000  |
| 6 | -5.778624000  | 0.062957000  | 0.066312000  |
| 6 | -6.910472000  | 0.913263000  | 0.023537000  |
| 6 | -5.996622000  | -1.387774000 | 0.198498000  |
| 6 | -8.189654000  | 0.422605000  | 0.101398000  |
| 1 | -6.777249000  | 1.984788000  | -0.073161000 |
| 6 | -8.457279000  | -1.020453000 | 0.233981000  |
| 6 | -9.312251000  | 1.298801000  | 0.056622000  |
| 7 | -10.200038000 | 2.051061000  | 0.016291000  |
| 8 | -5.065350000  | -2.193679000 | 0.244024000  |
| 8 | -9.585136000  | -1.486423000 | 0.305865000  |
| 7 | -7.312669000  | -1.839706000 | 0.273197000  |
| 6 | -7.498779000  | -3.289433000 | 0.404010000  |
| 1 | -7.051017000  | -3.798114000 | -0.452096000 |
| 1 | -7.005361000  | -3.645103000 | 1.310801000  |
| 1 | -8.568005000  | -3.479956000 | 0.448368000  |
| 1 | 10.772712000  | 0.135230000  | 1.608558000  |
| 1 | 10.720675000  | -1.609438000 | 0.988876000  |

**S6TIIDS0-OS** E=-2434.686971 Hartree

|   |              |              |              |
|---|--------------|--------------|--------------|
| 6 | 2.025022000  | 1.777673000  | -0.250750000 |
| 6 | 2.639629000  | 0.469564000  | -0.199741000 |
| 6 | 1.770025000  | -0.654269000 | -0.099951000 |
| 6 | 0.412404000  | -0.469816000 | -0.072008000 |
| 6 | -0.192759000 | 0.831925000  | -0.141282000 |
| 6 | 0.670875000  | 1.971354000  | -0.229486000 |
| 6 | 4.276835000  | 2.126791000  | -0.264207000 |
| 6 | 4.037215000  | 0.641411000  | -0.193488000 |
| 1 | 2.188604000  | -1.649789000 | -0.075390000 |
| 1 | -0.229922000 | -1.340882000 | -0.000614000 |
| 1 | 0.259849000  | 2.972254000  | -0.269101000 |
| 6 | 5.095242000  | -0.314440000 | -0.183230000 |
| 6 | 6.431225000  | -0.199323000 | 0.225790000  |
| 6 | 4.930231000  | -1.715386000 | -0.708919000 |
| 6 | 7.091178000  | -1.474505000 | -0.015944000 |
| 6 | 7.196925000  | 0.833617000  | 0.857288000  |
| 6 | 8.391607000  | -1.711758000 | 0.301159000  |
| 6 | 8.499286000  | 0.608140000  | 1.186388000  |
| 1 | 6.738273000  | 1.794476000  | 1.039309000  |
| 6 | 9.166075000  | -0.656704000 | 0.923140000  |
| 1 | 8.860159000  | -2.670934000 | 0.107117000  |
| 1 | 9.079871000  | 1.393595000  | 1.661013000  |
| 8 | 3.946206000  | -2.257808000 | -1.191662000 |

|    |              |              |              |
|----|--------------|--------------|--------------|
| 8  | 5.330586000  | 2.746310000  | -0.314450000 |
| 7  | 6.171308000  | -2.337764000 | -0.585791000 |
| 7  | 3.022561000  | 2.735132000  | -0.303613000 |
| 6  | 2.835709000  | 4.167902000  | -0.390330000 |
| 1  | 2.285740000  | 4.436930000  | -1.298490000 |
| 1  | 2.291831000  | 4.546851000  | 0.481909000  |
| 1  | 3.826913000  | 4.621129000  | -0.422341000 |
| 6  | 6.422304000  | -3.700042000 | -1.005106000 |
| 1  | 7.196849000  | -3.735120000 | -1.778760000 |
| 1  | 6.736525000  | -4.319596000 | -0.157971000 |
| 1  | 5.488512000  | -4.089832000 | -1.411378000 |
| 6  | -1.597708000 | 0.987797000  | -0.116264000 |
| 6  | -2.334745000 | 2.197084000  | -0.186346000 |
| 16 | -2.703481000 | -0.390596000 | 0.016876000  |
| 6  | -3.696270000 | 2.033709000  | -0.136808000 |
| 1  | -1.867160000 | 3.170214000  | -0.274042000 |
| 6  | -4.114592000 | 0.668553000  | -0.022561000 |
| 1  | -4.425009000 | 2.828596000  | -0.176880000 |
| 6  | 10.475227000 | -0.837338000 | 1.261129000  |
| 6  | -5.427988000 | 0.183468000  | 0.051353000  |
| 6  | -6.572395000 | 1.090822000  | 0.016071000  |
| 6  | -5.639814000 | -1.249816000 | 0.165293000  |
| 6  | -8.079943000 | -0.879568000 | 0.207164000  |
| 8  | -4.707259000 | -2.055477000 | 0.200151000  |
| 7  | -6.969632000 | -1.704678000 | 0.236594000  |
| 6  | -7.167724000 | -3.157974000 | 0.350334000  |
| 1  | -7.759760000 | -3.517242000 | -0.492532000 |
| 1  | -6.182542000 | -3.615676000 | 0.354343000  |
| 1  | -7.706166000 | -3.386795000 | 1.271099000  |
| 7  | -7.849554000 | 0.480034000  | 0.098616000  |
| 6  | -9.010231000 | 1.384062000  | 0.064411000  |
| 1  | -9.647005000 | 1.135768000  | -0.785891000 |
| 1  | -9.596125000 | 1.267820000  | 0.977297000  |
| 1  | -8.625414000 | 2.395785000  | -0.022479000 |
| 8  | -6.494278000 | 2.313292000  | -0.077608000 |
| 16 | -9.632266000 | -1.503954000 | 0.299373000  |
| 1  | 11.049898000 | -0.046077000 | 1.730630000  |
| 1  | 10.986151000 | -1.775884000 | 1.072493000  |

**S7TIIDS0-OS** E=-2188.616515 Hartree

|   |              |              |              |
|---|--------------|--------------|--------------|
| 6 | -2.164484000 | -1.839881000 | -0.430548000 |
| 6 | -2.747634000 | -0.530293000 | -0.270587000 |
| 6 | -1.854039000 | 0.569023000  | -0.162029000 |

|    |               |              |              |
|----|---------------|--------------|--------------|
| 6  | -0.497315000  | 0.360534000  | -0.222255000 |
| 6  | 0.072427000   | -0.941223000 | -0.395857000 |
| 6  | -0.812851000  | -2.057628000 | -0.498956000 |
| 6  | -4.418501000  | -2.160353000 | -0.325639000 |
| 6  | -4.153222000  | -0.683403000 | -0.188445000 |
| 1  | -2.249300000  | 1.569414000  | -0.065250000 |
| 1  | 0.163218000   | 1.218747000  | -0.156894000 |
| 1  | -0.424554000  | -3.062531000 | -0.607900000 |
| 6  | -5.190507000  | 0.279441000  | -0.059962000 |
| 6  | -6.515414000  | 0.154079000  | 0.398365000  |
| 6  | -5.025419000  | 1.716410000  | -0.485009000 |
| 6  | -7.158993000  | 1.452281000  | 0.280520000  |
| 6  | -7.272714000  | -0.907520000 | 0.986147000  |
| 6  | -8.441056000  | 1.687773000  | 0.670926000  |
| 6  | -8.556905000  | -0.685334000 | 1.388661000  |
| 1  | -6.826282000  | -1.886504000 | 1.078790000  |
| 6  | -9.208407000  | 0.604180000  | 1.247025000  |
| 1  | -8.897324000  | 2.666716000  | 0.567702000  |
| 1  | -9.130884000  | -1.494402000 | 1.830488000  |
| 8  | -4.055195000  | 2.281584000  | -0.968858000 |
| 8  | -5.481909000  | -2.765386000 | -0.348503000 |
| 7  | -6.249086000  | 2.343210000  | -0.263044000 |
| 7  | -3.179077000  | -2.780136000 | -0.474968000 |
| 6  | -3.020496000  | -4.207616000 | -0.654853000 |
| 1  | -2.527694000  | -4.429647000 | -1.607440000 |
| 1  | -2.433738000  | -4.643901000 | 0.161032000  |
| 1  | -4.018991000  | -4.645614000 | -0.655365000 |
| 6  | -6.495085000  | 3.736367000  | -0.569162000 |
| 1  | -7.302592000  | 3.838869000  | -1.301965000 |
| 1  | -6.760901000  | 4.295358000  | 0.334750000  |
| 1  | -5.573916000  | 4.142611000  | -0.987806000 |
| 6  | 1.479504000   | -1.130405000 | -0.452119000 |
| 6  | 2.190460000   | -2.324808000 | -0.714275000 |
| 16 | 2.616201000   | 0.189457000  | -0.194369000 |
| 6  | 3.559448000   | -2.189908000 | -0.701982000 |
| 1  | 1.695057000   | -3.264453000 | -0.924606000 |
| 6  | 4.011001000   | -0.861248000 | -0.433187000 |
| 1  | 4.267898000   | -2.988187000 | -0.869971000 |
| 6  | -10.500899000 | 0.782015000  | 1.654225000  |
| 6  | 5.347807000   | -0.490444000 | -0.241198000 |
| 6  | 6.392684000   | -1.527161000 | 0.047779000  |
| 6  | 5.958036000   | 0.807984000  | -0.032902000 |
| 6  | 7.536434000   | -0.794807000 | 0.643741000  |
| 6  | 7.265019000   | 0.584872000  | 0.648321000  |

|   |               |              |              |
|---|---------------|--------------|--------------|
| 6 | 8.712227000   | -1.325461000 | 1.154576000  |
| 6 | 8.200189000   | 1.462384000  | 1.203210000  |
| 6 | 9.643880000   | -0.444377000 | 1.709166000  |
| 1 | 8.882128000   | -2.396721000 | 1.117973000  |
| 6 | 9.380693000   | 0.929434000  | 1.734867000  |
| 1 | 8.033261000   | 2.530236000  | 1.240242000  |
| 1 | 10.572710000  | -0.823199000 | 2.124389000  |
| 1 | 10.107723000  | 1.604539000  | 2.175963000  |
| 8 | 6.333218000   | -2.737585000 | -0.121098000 |
| 6 | 5.526960000   | 2.038611000  | -0.512984000 |
| 6 | 4.518853000   | 2.195220000  | -1.510294000 |
| 7 | 3.745737000   | 2.374861000  | -2.363694000 |
| 6 | 6.162173000   | 3.269966000  | -0.165311000 |
| 7 | 6.642993000   | 4.294594000  | 0.112841000  |
| 1 | -11.070772000 | -0.031815000 | 2.089662000  |
| 1 | -11.000254000 | 1.740340000  | 1.556004000  |

**S8TIIDS0-OS** E=-2623.836375 Hartree

|   |              |              |              |
|---|--------------|--------------|--------------|
| 6 | -7.575577000 | 1.406660000  | 0.300210000  |
| 6 | -6.908182000 | 0.120782000  | 0.402322000  |
| 6 | -7.646322000 | -0.962646000 | 0.970984000  |
| 6 | -8.937801000 | -0.771515000 | 1.370093000  |
| 6 | -9.612990000 | 0.505647000  | 1.242497000  |
| 6 | -8.864856000 | 1.611655000  | 0.686753000  |
| 6 | -5.443903000 | 1.728670000  | -0.448235000 |
| 6 | -5.580365000 | 0.280205000  | -0.047578000 |
| 1 | -7.181380000 | -1.933745000 | 1.053244000  |
| 1 | -9.497239000 | -1.598172000 | 1.797659000  |
| 1 | -9.339268000 | 2.583015000  | 0.594845000  |
| 6 | -4.524798000 | -0.656216000 | -0.186079000 |
| 6 | -3.118905000 | -0.472318000 | -0.274602000 |
| 6 | -4.756864000 | -2.139462000 | -0.330056000 |
| 6 | -2.511534000 | -1.767317000 | -0.445111000 |
| 6 | -2.248816000 | 0.642720000  | -0.161836000 |
| 6 | -1.154607000 | -1.957377000 | -0.521229000 |
| 6 | -0.886579000 | 0.461994000  | -0.229355000 |
| 1 | -2.663207000 | 1.634316000  | -0.056529000 |
| 6 | -0.294196000 | -0.824916000 | -0.414800000 |
| 1 | -0.746209000 | -2.953846000 | -0.634039000 |
| 1 | -0.243994000 | 1.333727000  | -0.163460000 |
| 8 | -5.806277000 | -2.768086000 | -0.352265000 |
| 8 | -4.483751000 | 2.322094000  | -0.917692000 |
| 7 | -3.505261000 | -2.729700000 | -0.489674000 |

|    |               |              |              |
|----|---------------|--------------|--------------|
| 7  | -6.681425000  | 2.324863000  | -0.224493000 |
| 6  | -6.955844000  | 3.717240000  | -0.510512000 |
| 1  | -7.761079000  | 3.813335000  | -1.246592000 |
| 1  | -7.239041000  | 4.255757000  | 0.400454000  |
| 1  | -6.041444000  | 4.150008000  | -0.917100000 |
| 6  | -3.315183000  | -4.152569000 | -0.678616000 |
| 1  | -2.823040000  | -4.357533000 | -1.635269000 |
| 1  | -2.713913000  | -4.579388000 | 0.131549000  |
| 1  | -4.303254000  | -4.613431000 | -0.676022000 |
| 6  | -10.912483000 | 0.652507000  | 1.644819000  |
| 6  | 1.120370000   | -0.987390000 | -0.479950000 |
| 6  | 1.849405000   | -2.154835000 | -0.791342000 |
| 16 | 2.228391000   | 0.343059000  | -0.169885000 |
| 6  | 3.217416000   | -1.991015000 | -0.778496000 |
| 1  | 1.372558000   | -3.092798000 | -1.045657000 |
| 6  | 3.639715000   | -0.669475000 | -0.455775000 |
| 1  | 3.921870000   | -2.776162000 | -1.020693000 |
| 6  | 4.966737000   | -0.279024000 | -0.250253000 |
| 6  | 5.601618000   | 0.987620000  | -0.076010000 |
| 6  | 7.335942000   | -0.471378000 | 0.772769000  |
| 6  | 6.903783000   | 0.856866000  | 0.641590000  |
| 6  | 8.533201000   | -0.839622000 | 1.365656000  |
| 6  | 7.734200000   | 1.859013000  | 1.165331000  |
| 6  | 9.345899000   | 0.174164000  | 1.875843000  |
| 1  | 8.818832000   | -1.883897000 | 1.434983000  |
| 6  | 8.938867000   | 1.506902000  | 1.776991000  |
| 1  | 7.455857000   | 2.901700000  | 1.114820000  |
| 1  | 10.288169000  | -0.075007000 | 2.353044000  |
| 1  | 9.567934000   | 2.292315000  | 2.183796000  |
| 6  | 5.129518000   | 2.189562000  | -0.621736000 |
| 6  | 5.664403000   | 3.473384000  | -0.311662000 |
| 7  | 6.054465000   | 4.546901000  | -0.075353000 |
| 6  | 4.147851000   | 2.237473000  | -1.652484000 |
| 7  | 3.382832000   | 2.323753000  | -2.528257000 |
| 16 | 6.151613000   | -1.613568000 | 0.095681000  |
| 8  | 5.642744000   | -2.502082000 | 1.152113000  |
| 8  | 6.636924000   | -2.220971000 | -1.154721000 |
| 1  | -11.468484000 | -0.178544000 | 2.065349000  |
| 1  | -11.429860000 | 1.602213000  | 1.556975000  |

**S9TIIDS0-OS** E=-2609.776553 Hartree

|   |             |              |             |
|---|-------------|--------------|-------------|
| 6 | 6.906569000 | -1.507754000 | 0.000636000 |
| 6 | 6.252706000 | -0.226931000 | 0.219508000 |

|    |              |              |              |
|----|--------------|--------------|--------------|
| 6  | 7.032386000  | 0.812945000  | 0.822443000  |
| 6  | 8.334942000  | 0.585274000  | 1.151198000  |
| 6  | 8.993835000  | -0.689244000 | 0.915584000  |
| 6  | 8.206254000  | -1.749301000 | 0.318012000  |
| 6  | 4.740612000  | -1.750088000 | -0.678968000 |
| 6  | 4.912722000  | -0.341232000 | -0.178588000 |
| 1  | 6.581229000  | 1.781658000  | 0.981889000  |
| 1  | 8.923233000  | 1.378180000  | 1.604103000  |
| 1  | 8.665262000  | -2.716946000 | 0.142444000  |
| 6  | 3.857217000  | 0.619318000  | -0.199119000 |
| 6  | 2.452578000  | 0.447990000  | -0.199124000 |
| 6  | 4.098551000  | 2.093670000  | -0.278658000 |
| 6  | 1.840535000  | 1.753544000  | -0.257756000 |
| 6  | 1.579391000  | -0.667419000 | -0.090100000 |
| 6  | 0.485278000  | 1.953114000  | -0.233761000 |
| 6  | 0.218779000  | -0.477324000 | -0.060764000 |
| 1  | 1.992362000  | -1.665227000 | -0.060617000 |
| 6  | -0.382086000 | 0.819419000  | -0.136679000 |
| 1  | 0.080637000  | 2.957036000  | -0.279296000 |
| 1  | -0.423564000 | -1.349325000 | 0.016774000  |
| 8  | 5.150463000  | 2.722745000  | -0.334797000 |
| 8  | 3.754361000  | -2.301518000 | -1.150766000 |
| 7  | 2.842141000  | 2.706350000  | -0.319792000 |
| 7  | 5.978674000  | -2.378318000 | -0.547772000 |
| 6  | 6.219668000  | -3.748107000 | -0.941358000 |
| 1  | 6.994181000  | -3.804536000 | -1.714369000 |
| 1  | 6.530812000  | -4.355932000 | -0.084058000 |
| 1  | 5.282537000  | -4.138217000 | -1.340130000 |
| 6  | 2.662702000  | 4.136943000  | -0.414474000 |
| 1  | 2.111349000  | 4.406470000  | -1.322506000 |
| 1  | 2.122948000  | 4.527041000  | 0.456336000  |
| 1  | 3.657315000  | 4.583009000  | -0.451677000 |
| 6  | 10.303648000 | -0.875339000 | 1.252620000  |
| 6  | -1.788632000 | 0.985359000  | -0.112358000 |
| 6  | -2.535434000 | 2.187456000  | -0.187188000 |
| 16 | -2.902849000 | -0.387139000 | 0.026471000  |
| 6  | -3.900761000 | 2.029437000  | -0.137025000 |
| 1  | -2.060732000 | 3.156274000  | -0.279172000 |
| 6  | -4.326431000 | 0.674685000  | -0.017921000 |
| 1  | -4.603047000 | 2.854104000  | -0.183870000 |
| 6  | -5.615550000 | 0.196922000  | 0.055547000  |
| 16 | -5.995946000 | -1.520783000 | 0.202336000  |
| 16 | -7.024714000 | 1.268114000  | 0.009998000  |
| 6  | -7.753647000 | -1.325368000 | 0.232755000  |



|   |               |              |             |
|---|---------------|--------------|-------------|
| 6 | -8.237930000  | -0.011773000 | 0.142087000 |
| 6 | -8.641622000  | -2.398174000 | 0.340337000 |
| 6 | -9.612826000  | 0.234524000  | 0.158596000 |
| 6 | -10.013031000 | -2.147808000 | 0.356487000 |
| 1 | -8.265895000  | -3.413983000 | 0.410256000 |
| 6 | -10.495604000 | -0.839226000 | 0.266130000 |
| 1 | -9.987435000  | 1.250735000  | 0.088313000 |
| 1 | -10.706258000 | -2.978503000 | 0.439855000 |
| 1 | -11.564408000 | -0.651814000 | 0.279212000 |
| 1 | 10.887476000  | -0.079786000 | 1.703268000 |
| 1 | 10.804930000  | -1.822408000 | 1.081215000 |

**S10TIIDS0-OS** E=-2456.117888 Hartree

|   |              |              |              |
|---|--------------|--------------|--------------|
| 6 | 0.735487000  | 1.653238000  | -0.275328000 |
| 6 | 1.418083000  | 0.384985000  | -0.192700000 |
| 6 | 0.608242000  | -0.772574000 | -0.046292000 |
| 6 | -0.760738000 | -0.655673000 | -0.005090000 |
| 6 | -1.431617000 | 0.603938000  | -0.105012000 |
| 6 | -0.628609000 | 1.779779000  | -0.239759000 |
| 6 | 2.971340000  | 2.115322000  | -0.331169000 |
| 6 | 2.812052000  | 0.632403000  | -0.213714000 |
| 1 | 1.074939000  | -1.745624000 | 0.002472000  |
| 1 | -1.353640000 | -1.559106000 | 0.101392000  |
| 1 | -1.087639000 | 2.758980000  | -0.304640000 |
| 6 | 3.918320000  | -0.268197000 | -0.182928000 |
| 6 | 5.255622000  | -0.070804000 | 0.193135000  |
| 6 | 3.817466000  | -1.697351000 | -0.644313000 |
| 6 | 5.975338000  | -1.319488000 | -0.001455000 |
| 6 | 5.985172000  | 1.025145000  | 0.757685000  |
| 6 | 7.290338000  | -1.482005000 | 0.303546000  |
| 6 | 7.302520000  | 0.877117000  | 1.073753000  |
| 1 | 5.484110000  | 1.971963000  | 0.898477000  |
| 6 | 8.026691000  | -0.365492000 | 0.861858000  |
| 1 | 7.798774000  | -2.427909000 | 0.146675000  |
| 1 | 7.852370000  | 1.712522000  | 1.497632000  |
| 8 | 2.857211000  | -2.314301000 | -1.087801000 |
| 8 | 3.986317000  | 2.799599000  | -0.415798000 |
| 7 | 5.089405000  | -2.253672000 | -0.513623000 |
| 7 | 1.682820000  | 2.657331000  | -0.372415000 |
| 6 | 1.424354000  | 4.073013000  | -0.501190000 |
| 1 | 0.848412000  | 4.288126000  | -1.408502000 |
| 1 | 0.874341000  | 4.456096000  | 0.366335000  |

|    |               |              |              |
|----|---------------|--------------|--------------|
| 1  | 2.392621000   | 4.571319000  | -0.562889000 |
| 6  | 5.400222000   | -3.618098000 | -0.875458000 |
| 1  | 6.167388000   | -3.652360000 | -1.657060000 |
| 1  | 5.754392000   | -4.185649000 | -0.007299000 |
| 1  | 4.481109000   | -4.068831000 | -1.251658000 |
| 6  | -2.845768000  | 0.694445000  | -0.067987000 |
| 6  | -3.657684000  | 1.850693000  | -0.162201000 |
| 16 | -3.881746000  | -0.733017000 | 0.116444000  |
| 6  | -5.012796000  | 1.618952000  | -0.092184000 |
| 1  | -3.238248000  | 2.841673000  | -0.282544000 |
| 6  | -5.361143000  | 0.247612000  | 0.063504000  |
| 1  | -5.759814000  | 2.402711000  | -0.150205000 |
| 6  | 9.349300000   | -0.471380000 | 1.184595000  |
| 6  | -6.621733000  | -0.300978000 | 0.163128000  |
| 16 | -6.915469000  | -2.035025000 | 0.354214000  |
| 16 | -8.100452000  | 0.676645000  | 0.110443000  |
| 6  | -8.666790000  | -1.903672000 | 0.397602000  |
| 6  | -9.200606000  | -0.680792000 | 0.287621000  |
| 1  | -10.261101000 | -0.461890000 | 0.299358000  |
| 1  | -9.231324000  | -2.820664000 | 0.511472000  |
| 1  | 9.894681000   | 0.366356000  | 1.606004000  |
| 1  | 9.899124000   | -1.394185000 | 1.030546000  |

**S1TIIDS0-T1** E=-1768.013146 Hartree

|   |              |              |              |
|---|--------------|--------------|--------------|
| 6 | 5.333601000  | -1.156239000 | -0.066067000 |
| 6 | 4.589401000  | 0.056185000  | 0.145411000  |
| 6 | 5.299629000  | 1.178468000  | 0.638038000  |
| 6 | 6.653828000  | 1.089568000  | 0.871043000  |
| 6 | 7.399671000  | -0.115933000 | 0.632666000  |
| 6 | 6.680359000  | -1.264074000 | 0.152406000  |
| 6 | 3.164274000  | -1.685439000 | -0.550185000 |
| 6 | 3.202574000  | -0.221103000 | -0.142427000 |
| 1 | 4.774880000  | 2.106291000  | 0.805649000  |
| 1 | 7.189377000  | 1.957586000  | 1.243556000  |
| 1 | 7.209459000  | -2.195156000 | -0.021006000 |
| 6 | 2.072057000  | 0.589676000  | -0.132095000 |
| 6 | 0.645350000  | 0.266111000  | -0.178729000 |
| 6 | 2.134220000  | 2.098288000  | -0.114097000 |
| 6 | -0.069734000 | 1.497534000  | -0.184055000 |
| 6 | -0.107322000 | -0.915861000 | -0.130648000 |
| 6 | -1.450716000 | 1.572222000  | -0.175535000 |
| 6 | -1.498412000 | -0.856284000 | -0.119684000 |
| 1 | 0.391452000  | -1.872426000 | -0.132176000 |

|    |              |              |              |
|----|--------------|--------------|--------------|
| 6  | -2.192571000 | 0.369724000  | -0.151185000 |
| 1  | -1.950213000 | 2.533423000  | -0.151493000 |
| 1  | -2.055693000 | -1.787630000 | -0.117923000 |
| 8  | 3.102810000  | 2.847879000  | -0.108026000 |
| 8  | 2.220053000  | -2.371033000 | -0.914541000 |
| 7  | 0.824208000  | 2.558443000  | -0.165713000 |
| 7  | 4.466251000  | -2.153956000 | -0.494460000 |
| 6  | 4.836831000  | -3.510415000 | -0.838602000 |
| 1  | 5.554416000  | -3.519461000 | -1.665898000 |
| 1  | 5.278892000  | -4.024836000 | 0.021631000  |
| 1  | 3.927200000  | -4.028549000 | -1.142516000 |
| 6  | 0.479454000  | 3.963923000  | -0.187912000 |
| 1  | -0.084499000 | 4.213117000  | -1.093286000 |
| 1  | -0.117427000 | 4.235830000  | 0.689783000  |
| 1  | 1.413360000  | 4.526146000  | -0.178074000 |
| 6  | 8.764170000  | -0.166988000 | 0.866002000  |
| 6  | -3.648060000 | 0.417064000  | -0.157415000 |
| 6  | -4.473755000 | 1.471145000  | -0.549517000 |
| 16 | -4.610708000 | -0.951929000 | 0.374281000  |
| 6  | -5.838736000 | 1.199182000  | -0.440735000 |
| 1  | -4.083692000 | 2.405104000  | -0.934989000 |
| 6  | -6.109053000 | -0.091668000 | 0.047898000  |
| 1  | -6.628628000 | 1.889845000  | -0.710520000 |
| 6  | -7.376726000 | -0.672368000 | 0.272406000  |
| 6  | -8.554142000 | 0.073696000  | 0.004969000  |
| 7  | -9.506150000 | 0.708787000  | -0.223174000 |
| 6  | -7.517281000 | -1.994373000 | 0.763866000  |
| 7  | -7.610220000 | -3.085098000 | 1.169351000  |
| 1  | 9.302727000  | 0.699902000  | 1.232683000  |
| 1  | 9.334730000  | -1.072578000 | 0.689702000  |

**S2TIIDS0-T1** E=-1850.501163 Hartree

|   |              |              |              |
|---|--------------|--------------|--------------|
| 6 | 0.736130000  | 1.613775000  | -0.212336000 |
| 6 | 1.384953000  | 0.346185000  | -0.225984000 |
| 6 | 0.566691000  | -0.794059000 | -0.233183000 |
| 6 | -0.818394000 | -0.658396000 | -0.255336000 |
| 6 | -1.444449000 | 0.603621000  | -0.264506000 |
| 6 | -0.638980000 | 1.762763000  | -0.232808000 |
| 6 | 2.965990000  | 2.090775000  | -0.072438000 |
| 6 | 2.821224000  | 0.588584000  | -0.133897000 |
| 1 | 1.013464000  | -1.775990000 | -0.252914000 |
| 1 | -1.427431000 | -1.555667000 | -0.298033000 |
| 1 | -1.089261000 | 2.747546000  | -0.189063000 |

|    |               |              |              |
|----|---------------|--------------|--------------|
| 6  | 3.908951000   | -0.283758000 | -0.137497000 |
| 6  | 5.294953000   | -0.091910000 | 0.203976000  |
| 6  | 3.804940000   | -1.726892000 | -0.597012000 |
| 6  | 5.982616000   | -1.335742000 | -0.025446000 |
| 6  | 6.047765000   | 0.973988000  | 0.758701000  |
| 6  | 7.312883000   | -1.522901000 | 0.232452000  |
| 6  | 7.385366000   | 0.804618000  | 1.031983000  |
| 1  | 5.567394000   | 1.922954000  | 0.940862000  |
| 6  | 8.076154000   | -0.431508000 | 0.776057000  |
| 1  | 7.797920000   | -2.474871000 | 0.043768000  |
| 1  | 7.953182000   | 1.629553000  | 1.451879000  |
| 8  | 2.838512000   | -2.348799000 | -1.014944000 |
| 8  | 3.974644000   | 2.784633000  | -0.023326000 |
| 7  | 5.078287000   | -2.269016000 | -0.516282000 |
| 7  | 1.685222000   | 2.624211000  | -0.140408000 |
| 6  | 1.418154000   | 4.046151000  | -0.130491000 |
| 1  | 0.891445000   | 4.351098000  | -1.041329000 |
| 1  | 0.814496000   | 4.326827000  | 0.739874000  |
| 1  | 2.380773000   | 4.555648000  | -0.082247000 |
| 6  | 5.385902000   | -3.631072000 | -0.896067000 |
| 1  | 6.128381000   | -3.652951000 | -1.701038000 |
| 1  | 5.771615000   | -4.198035000 | -0.041590000 |
| 1  | 4.459558000   | -4.087416000 | -1.245462000 |
| 6  | -2.898608000  | 0.734394000  | -0.305812000 |
| 6  | -3.652767000  | 1.813631000  | -0.737303000 |
| 16 | -3.951071000  | -0.555169000 | 0.235919000  |
| 6  | -5.042316000  | 1.612772000  | -0.646556000 |
| 1  | -3.207660000  | 2.714781000  | -1.141807000 |
| 6  | -5.404088000  | 0.367435000  | -0.139134000 |
| 1  | -5.765403000  | 2.353994000  | -0.963348000 |
| 6  | 9.425330000   | -0.563215000 | 1.051329000  |
| 6  | -6.722490000  | -0.165696000 | 0.083078000  |
| 6  | -6.921803000  | -1.505231000 | 0.538126000  |
| 6  | -7.882094000  | 0.640512000  | -0.146836000 |
| 6  | -8.174354000  | -2.012227000 | 0.749990000  |
| 1  | -6.055639000  | -2.137552000 | 0.713159000  |
| 6  | -9.142778000  | 0.153736000  | 0.058282000  |
| 1  | -7.756063000  | 1.663970000  | -0.484434000 |
| 6  | -9.369813000  | -1.209940000 | 0.521762000  |
| 1  | -8.323531000  | -3.030996000 | 1.092991000  |
| 1  | -10.021884000 | 0.766628000  | -0.113627000 |
| 8  | -10.517998000 | -1.662658000 | 0.711814000  |
| 1  | 9.996058000   | 0.260796000  | 1.465314000  |
| 1  | 9.953479000   | -1.491731000 | 0.862246000  |

S3TIIDS0-T1 E=-2335.872612 Hartree

|    |              |              |              |
|----|--------------|--------------|--------------|
| 6  | 1.799149000  | 1.610297000  | -0.166431000 |
| 6  | 2.445203000  | 0.341076000  | -0.212039000 |
| 6  | 1.625793000  | -0.797593000 | -0.251308000 |
| 6  | 0.241204000  | -0.659160000 | -0.272973000 |
| 6  | -0.381745000 | 0.604343000  | -0.250683000 |
| 6  | 0.424356000  | 1.761956000  | -0.187383000 |
| 6  | 4.029905000  | 2.076176000  | -0.009536000 |
| 6  | 3.881282000  | 0.577753000  | -0.111226000 |
| 1  | 2.071356000  | -1.779207000 | -0.296929000 |
| 1  | -0.368385000 | -1.554537000 | -0.342386000 |
| 1  | -0.024125000 | 2.746106000  | -0.119157000 |
| 6  | 4.966544000  | -0.298690000 | -0.136727000 |
| 6  | 6.350142000  | -0.121350000 | 0.214641000  |
| 6  | 4.859621000  | -1.727578000 | -0.640194000 |
| 6  | 7.035597000  | -1.360237000 | -0.049720000 |
| 6  | 7.103220000  | 0.926620000  | 0.803658000  |
| 6  | 8.364090000  | -1.557875000 | 0.207052000  |
| 6  | 8.438884000  | 0.746016000  | 1.076278000  |
| 1  | 6.624211000  | 1.870880000  | 1.012018000  |
| 6  | 9.127491000  | -0.484225000 | 0.785720000  |
| 1  | 8.848183000  | -2.504642000 | -0.008059000 |
| 1  | 9.007440000  | 1.556398000  | 1.522514000  |
| 8  | 3.891906000  | -2.332204000 | -1.079536000 |
| 8  | 5.039810000  | 2.765833000  | 0.060425000  |
| 7  | 6.130517000  | -2.275803000 | -0.571336000 |
| 7  | 2.749709000  | 2.615173000  | -0.065994000 |
| 6  | 2.486813000  | 4.037560000  | -0.019079000 |
| 1  | 1.964065000  | 4.368208000  | -0.923119000 |
| 1  | 1.882010000  | 4.296845000  | 0.857018000  |
| 1  | 3.450885000  | 4.542431000  | 0.045282000  |
| 6  | 6.435840000  | -3.627081000 | -0.990958000 |
| 1  | 7.180937000  | -3.626475000 | -1.793665000 |
| 1  | 6.816801000  | -4.220226000 | -0.152402000 |
| 1  | 5.509662000  | -4.070286000 | -1.357154000 |
| 6  | -1.834462000 | 0.738112000  | -0.291496000 |
| 6  | -2.587282000 | 1.831773000  | -0.692582000 |
| 16 | -2.885547000 | -0.569644000 | 0.210749000  |
| 6  | -3.976545000 | 1.629479000  | -0.612770000 |
| 1  | -2.139744000 | 2.744084000  | -1.067110000 |
| 6  | -4.330640000 | 0.369105000  | -0.144175000 |
| 1  | -4.708961000 | 2.374596000  | -0.902308000 |

|    |               |              |              |
|----|---------------|--------------|--------------|
| 6  | 10.474580000  | -0.626879000 | 1.061562000  |
| 6  | -5.635012000  | -0.169699000 | 0.056345000  |
| 6  | -5.989707000  | -1.458876000 | 0.493388000  |
| 16 | -7.100356000  | 0.745835000  | -0.226452000 |
| 1  | -5.260297000  | -2.225009000 | 0.735799000  |
| 6  | -8.042382000  | -0.683231000 | 0.264871000  |
| 6  | -9.448523000  | -0.683747000 | 0.285953000  |
| 6  | -10.182434000 | 0.470379000  | -0.090076000 |
| 7  | -10.761398000 | 1.433625000  | -0.404280000 |
| 6  | -10.165662000 | -1.841853000 | 0.685572000  |
| 7  | -10.783503000 | -2.776297000 | 1.008674000  |
| 7  | -7.288527000  | -1.736041000 | 0.605927000  |
| 1  | 11.045586000  | 0.183179000  | 1.501862000  |
| 1  | 11.001598000  | -1.550451000 | 0.846860000  |

**S4TIIDS0-T1** E=-2301.893804 Hartree

|   |              |              |              |
|---|--------------|--------------|--------------|
| 6 | 1.269383000  | 1.681222000  | -0.160669000 |
| 6 | 1.894360000  | 0.403843000  | -0.220449000 |
| 6 | 1.055594000  | -0.719522000 | -0.271777000 |
| 6 | -0.327131000 | -0.557854000 | -0.292067000 |
| 6 | -0.930721000 | 0.715208000  | -0.257123000 |
| 6 | -0.102274000 | 1.856985000  | -0.180446000 |
| 6 | 3.507231000  | 2.113911000  | 0.004981000  |
| 6 | 3.337028000  | 0.617005000  | -0.115362000 |
| 1 | 1.483629000  | -1.708400000 | -0.325396000 |
| 1 | -0.951519000 | -1.442194000 | -0.367166000 |
| 1 | -0.532597000 | 2.848465000  | -0.102232000 |
| 6 | 4.407768000  | -0.271603000 | -0.150237000 |
| 6 | 5.800901000  | -0.115889000 | 0.194325000  |
| 6 | 4.278157000  | -1.697650000 | -0.656446000 |
| 6 | 6.463737000  | -1.363176000 | -0.077151000 |
| 6 | 6.574035000  | 0.916114000  | 0.780910000  |
| 6 | 7.791481000  | -1.584013000 | 0.171264000  |
| 6 | 7.909957000  | 0.712725000  | 1.045257000  |
| 1 | 6.112132000  | 1.867383000  | 0.995646000  |
| 6 | 8.575895000  | -0.526238000 | 0.747771000  |
| 1 | 8.257563000  | -2.538501000 | -0.049688000 |
| 1 | 8.493696000  | 1.513111000  | 1.490094000  |
| 8 | 3.300828000  | -2.288474000 | -1.093255000 |
| 8 | 4.527478000  | 2.787669000  | 0.084808000  |
| 7 | 5.541726000  | -2.263939000 | -0.595992000 |
| 7 | 2.236891000  | 2.671342000  | -0.047718000 |
| 6 | 1.994335000  | 4.096227000  | 0.015532000  |

|    |              |              |              |
|----|--------------|--------------|--------------|
| 1  | 1.476639000  | 4.444597000  | -0.884863000 |
| 1  | 1.391735000  | 4.353806000  | 0.893756000  |
| 1  | 2.965273000  | 4.586878000  | 0.086679000  |
| 6  | 5.824581000  | -3.618139000 | -1.020395000 |
| 1  | 6.565415000  | -3.626914000 | -1.827152000 |
| 1  | 6.201551000  | -4.219176000 | -0.185520000 |
| 1  | 4.889783000  | -4.046536000 | -1.382414000 |
| 6  | -2.380934000 | 0.871215000  | -0.296068000 |
| 6  | -3.105652000 | 1.999577000  | -0.670453000 |
| 16 | -3.453513000 | -0.440308000 | 0.161523000  |
| 6  | -4.491026000 | 1.827679000  | -0.605331000 |
| 1  | -2.635856000 | 2.913612000  | -1.013180000 |
| 6  | -4.880498000 | 0.547756000  | -0.171062000 |
| 1  | -5.209473000 | 2.593997000  | -0.873178000 |
| 6  | 9.924667000  | -0.692849000 | 1.015350000  |
| 6  | -6.184083000 | 0.067700000  | -0.001168000 |
| 6  | -6.508840000 | -1.280121000 | 0.448891000  |
| 16 | -7.634523000 | 1.015774000  | -0.306200000 |
| 6  | -8.696911000 | -0.388881000 | 0.164188000  |
| 7  | -7.902478000 | -1.458438000 | 0.514550000  |
| 6  | -8.503265000 | -2.719088000 | 0.936697000  |
| 1  | -9.129784000 | -3.123441000 | 0.138488000  |
| 1  | -7.685963000 | -3.404477000 | 1.158737000  |
| 1  | -9.118718000 | -2.563928000 | 1.825726000  |
| 8  | -9.904361000 | -0.357244000 | 0.160286000  |
| 8  | -5.702766000 | -2.158566000 | 0.737874000  |
| 1  | 10.511736000 | 0.106271000  | 1.454442000  |
| 1  | 10.434279000 | -1.624716000 | 0.794689000  |

**S5TIIDS0-T1** E=-2073.357171 Hartree

|   |              |              |              |
|---|--------------|--------------|--------------|
| 6 | 1.652184000  | 1.702428000  | -0.119798000 |
| 6 | 2.281215000  | 0.427847000  | -0.208907000 |
| 6 | 1.447984000  | -0.698136000 | -0.282609000 |
| 6 | 0.064753000  | -0.542009000 | -0.295862000 |
| 6 | -0.543479000 | 0.728494000  | -0.233270000 |
| 6 | 0.280061000  | 1.872836000  | -0.135305000 |
| 6 | 3.889326000  | 2.137381000  | 0.051196000  |
| 6 | 3.723850000  | 0.644234000  | -0.102998000 |
| 1 | 1.880232000  | -1.683612000 | -0.358957000 |
| 1 | -0.555916000 | -1.427232000 | -0.387655000 |
| 1 | -0.153680000 | 2.860945000  | -0.037113000 |
| 6 | 4.796467000  | -0.240965000 | -0.161698000 |
| 6 | 6.189001000  | -0.089986000 | 0.183154000  |

|    |               |              |              |
|----|---------------|--------------|--------------|
| 6  | 4.669871000   | -1.655368000 | -0.704078000 |
| 6  | 6.854820000   | -1.328404000 | -0.121007000 |
| 6  | 6.959492000   | 0.930345000  | 0.793737000  |
| 6  | 8.183621000   | -1.550681000 | 0.118989000  |
| 6  | 8.296445000   | 0.724983000  | 1.049980000  |
| 1  | 6.494651000   | 1.874315000  | 1.032945000  |
| 6  | 8.965178000   | -0.504316000 | 0.719994000  |
| 1  | 8.652815000   | -2.497550000 | -0.126476000 |
| 1  | 8.878744000   | 1.515764000  | 1.513303000  |
| 8  | 3.692618000   | -2.236051000 | -1.153626000 |
| 8  | 4.907066000   | 2.812547000  | 0.145190000  |
| 7  | 5.934520000   | -2.218980000 | -0.660195000 |
| 7  | 2.616315000   | 2.691963000  | 0.012704000  |
| 6  | 2.369643000   | 4.114703000  | 0.108538000  |
| 1  | 1.850456000   | 4.481849000  | -0.783414000 |
| 1  | 1.767492000   | 4.350250000  | 0.993149000  |
| 1  | 3.339237000   | 4.606316000  | 0.189949000  |
| 6  | 6.221090000   | -3.561466000 | -1.119493000 |
| 1  | 6.960557000   | -3.546811000 | -1.927260000 |
| 1  | 6.601083000   | -4.181948000 | -0.300515000 |
| 1  | 5.287312000   | -3.983769000 | -1.491003000 |
| 6  | -1.992787000  | 0.877007000  | -0.265748000 |
| 6  | -2.721551000  | 2.018536000  | -0.601085000 |
| 16 | -3.060247000  | -0.450588000 | 0.144584000  |
| 6  | -4.101866000  | 1.833116000  | -0.541129000 |
| 1  | -2.259503000  | 2.947441000  | -0.912278000 |
| 6  | -4.489788000  | 0.536803000  | -0.151131000 |
| 1  | -4.811826000  | 2.613147000  | -0.786630000 |
| 6  | 10.314834000  | -0.672779000 | 0.980423000  |
| 6  | -5.817626000  | 0.055446000  | 0.001011000  |
| 6  | -6.943226000  | 0.875403000  | -0.225679000 |
| 6  | -6.040584000  | -1.346472000 | 0.409194000  |
| 6  | -8.227836000  | 0.401688000  | -0.081694000 |
| 1  | -6.808075000  | 1.909413000  | -0.521376000 |
| 6  | -8.499275000  | -0.990668000 | 0.318214000  |
| 6  | -9.348216000  | 1.247706000  | -0.315948000 |
| 7  | -10.235482000 | 1.974630000  | -0.517552000 |
| 8  | -5.112102000  | -2.123004000 | 0.632405000  |
| 8  | -9.630287000  | -1.435419000 | 0.451499000  |
| 7  | -7.358046000  | -1.781830000 | 0.539478000  |
| 6  | -7.546500000  | -3.180445000 | 0.943979000  |
| 1  | -7.078020000  | -3.842169000 | 0.212827000  |
| 1  | -7.074784000  | -3.350948000 | 1.913720000  |
| 1  | -8.616250000  | -3.364804000 | 0.999294000  |



|   |              |              |             |
|---|--------------|--------------|-------------|
| 1 | 10.900121000 | 0.117212000  | 1.437993000 |
| 1 | 10.827200000 | -1.597041000 | 0.735559000 |

**S6TIIDS0-T1** E=-2434.677464 Hartree

|    |              |              |              |
|----|--------------|--------------|--------------|
| 6  | 2.014603000  | 1.708873000  | -0.110528000 |
| 6  | 2.620189000  | 0.422776000  | -0.191755000 |
| 6  | 1.766736000  | -0.688275000 | -0.254777000 |
| 6  | 0.386579000  | -0.507117000 | -0.265552000 |
| 6  | -0.199978000 | 0.775026000  | -0.212248000 |
| 6  | 0.646447000  | 1.904814000  | -0.125153000 |
| 6  | 4.259769000  | 2.106486000  | 0.053072000  |
| 6  | 4.068422000  | 0.614475000  | -0.090629000 |
| 1  | 2.180555000  | -1.682104000 | -0.323411000 |
| 1  | -0.249766000 | -1.382104000 | -0.345782000 |
| 1  | 0.232573000  | 2.902081000  | -0.036738000 |
| 6  | 5.124291000  | -0.288049000 | -0.146163000 |
| 6  | 6.524075000  | -0.157210000 | 0.188122000  |
| 6  | 4.970758000  | -1.706795000 | -0.671394000 |
| 6  | 7.165221000  | -1.409520000 | -0.106919000 |
| 6  | 7.316081000  | 0.855106000  | 0.781883000  |
| 6  | 8.492147000  | -1.653011000 | 0.126424000  |
| 6  | 8.651957000  | 0.628811000  | 1.031271000  |
| 1  | 6.869735000  | 1.809560000  | 1.014457000  |
| 6  | 9.295929000  | -0.614812000 | 0.710265000  |
| 1  | 8.942413000  | -2.610802000 | -0.112020000 |
| 1  | 9.251032000  | 1.414401000  | 1.481857000  |
| 8  | 3.981143000  | -2.276501000 | -1.107573000 |
| 8  | 5.289412000  | 2.764242000  | 0.140501000  |
| 7  | 6.226080000  | -2.290422000 | -0.630038000 |
| 7  | 2.997171000  | 2.682246000  | 0.012688000  |
| 6  | 2.775097000  | 4.109870000  | 0.096439000  |
| 1  | 2.259874000  | 4.477555000  | -0.797546000 |
| 1  | 2.178949000  | 4.363251000  | 0.980156000  |
| 1  | 3.753048000  | 4.585649000  | 0.171385000  |
| 6  | 6.487072000  | -3.642584000 | -1.075869000 |
| 1  | 7.222300000  | -3.649390000 | -1.887603000 |
| 1  | 6.860986000  | -4.260447000 | -0.252101000 |
| 1  | 5.544203000  | -4.052933000 | -1.437685000 |
| 6  | -1.643889000 | 0.948179000  | -0.242157000 |
| 6  | -2.353434000 | 2.118591000  | -0.533616000 |
| 16 | -2.736355000 | -0.379122000 | 0.110689000  |
| 6  | -3.732297000 | 1.965685000  | -0.488102000 |
| 1  | -1.872177000 | 3.051032000  | -0.802883000 |

|    |              |              |              |
|----|--------------|--------------|--------------|
| 6  | -4.153491000 | 0.652070000  | -0.149283000 |
| 1  | -4.452606000 | 2.742477000  | -0.694011000 |
| 6  | 10.645673000 | -0.804847000 | 0.963295000  |
| 6  | -5.473178000 | 0.175913000  | -0.018140000 |
| 6  | -6.617928000 | 1.061879000  | -0.227716000 |
| 6  | -5.691942000 | -1.220863000 | 0.330908000  |
| 6  | -8.132412000 | -0.853397000 | 0.244378000  |
| 8  | -4.763094000 | -2.006058000 | 0.526277000  |
| 7  | -7.024167000 | -1.658834000 | 0.441020000  |
| 6  | -7.228436000 | -3.073747000 | 0.790756000  |
| 1  | -7.795533000 | -3.570631000 | 0.002501000  |
| 1  | -6.244984000 | -3.521648000 | 0.900853000  |
| 1  | -7.794449000 | -3.146134000 | 1.720403000  |
| 7  | -7.896819000 | 0.470624000  | -0.079573000 |
| 6  | -9.054448000 | 1.354704000  | -0.292513000 |
| 1  | -9.667957000 | 0.969503000  | -1.108114000 |
| 1  | -9.664826000 | 1.387666000  | 0.610976000  |
| 1  | -8.665504000 | 2.339642000  | -0.532846000 |
| 8  | -6.531750000 | 2.252500000  | -0.516309000 |
| 16 | -9.687063000 | -1.458521000 | 0.394158000  |
| 1  | 11.248077000 | -0.020509000 | 1.408143000  |
| 1  | 11.139517000 | -1.740763000 | 0.724825000  |

**S7TIIDS0-T1** E=-2188.608894 Hartree

|   |              |              |              |
|---|--------------|--------------|--------------|
| 6 | -2.135162000 | -1.785426000 | -0.322364000 |
| 6 | -2.727700000 | -0.491035000 | -0.278541000 |
| 6 | -1.865308000 | 0.614619000  | -0.313079000 |
| 6 | -0.489696000 | 0.423234000  | -0.412344000 |
| 6 | 0.079231000  | -0.864840000 | -0.477051000 |
| 6 | -0.771731000 | -1.991661000 | -0.423939000 |
| 6 | -4.372685000 | -2.172607000 | -0.064940000 |
| 6 | -4.169570000 | -0.676597000 | -0.110911000 |
| 1 | -2.270204000 | 1.614341000  | -0.294184000 |
| 1 | 0.153221000  | 1.294790000  | -0.480860000 |
| 1 | -0.362419000 | -2.994973000 | -0.424727000 |
| 6 | -5.216036000 | 0.237988000  | -0.040262000 |
| 6 | -6.593649000 | 0.095954000  | 0.365624000  |
| 6 | -5.074445000 | 1.688820000  | -0.472060000 |
| 6 | -7.235848000 | 1.372126000  | 0.197859000  |
| 6 | -7.362869000 | -0.949948000 | 0.932550000  |
| 6 | -8.543468000 | 1.608942000  | 0.525391000  |
| 6 | -8.678258000 | -0.731022000 | 1.275482000  |
| 1 | -6.915605000 | -1.922225000 | 1.070185000  |

|    |               |              |              |
|----|---------------|--------------|--------------|
| 6  | -9.324956000  | 0.538140000  | 1.081262000  |
| 1  | -8.995256000  | 2.584775000  | 0.381868000  |
| 1  | -9.260002000  | -1.541473000 | 1.704252000  |
| 8  | -4.104271000  | 2.279247000  | -0.923495000 |
| 8  | -5.404500000  | -2.825853000 | 0.031030000  |
| 7  | -6.317774000  | 2.279502000  | -0.316054000 |
| 7  | -3.121322000  | -2.756045000 | -0.214844000 |
| 6  | -2.913916000  | -4.187968000 | -0.245486000 |
| 1  | -2.452605000  | -4.495224000 | -1.190276000 |
| 1  | -2.274507000  | -4.510010000 | 0.583988000  |
| 1  | -3.892687000  | -4.658661000 | -0.151410000 |
| 6  | -6.586247000  | 3.662216000  | -0.649964000 |
| 1  | -7.365317000  | 3.733110000  | -1.416473000 |
| 1  | -6.905825000  | 4.223032000  | 0.235176000  |
| 1  | -5.659912000  | 4.089123000  | -1.034631000 |
| 6  | 1.518397000   | -1.053099000 | -0.594332000 |
| 6  | 2.202339000   | -2.165057000 | -1.090504000 |
| 16 | 2.642486000   | 0.183907000  | -0.092351000 |
| 6  | 3.588635000   | -2.033902000 | -1.068871000 |
| 1  | 1.691787000   | -3.033573000 | -1.488294000 |
| 6  | 4.036544000   | -0.791968000 | -0.563897000 |
| 1  | 4.289146000   | -2.786102000 | -1.402304000 |
| 6  | -10.654078000 | 0.720299000  | 1.426002000  |
| 6  | 5.380537000   | -0.442735000 | -0.317142000 |
| 6  | 6.428738000   | -1.507871000 | -0.161668000 |
| 6  | 5.991627000   | 0.819805000  | 0.028286000  |
| 6  | 7.584156000   | -0.847350000 | 0.490864000  |
| 6  | 7.313622000   | 0.523357000  | 0.653529000  |
| 6  | 8.768496000   | -1.430030000 | 0.918088000  |
| 6  | 8.258669000   | 1.334463000  | 1.285620000  |
| 6  | 9.711155000   | -0.614596000 | 1.549744000  |
| 1  | 8.937017000   | -2.490480000 | 0.760465000  |
| 6  | 9.449171000   | 0.747162000  | 1.732434000  |
| 1  | 8.093722000   | 2.391333000  | 1.444705000  |
| 1  | 10.647067000  | -1.035951000 | 1.903290000  |
| 1  | 10.184696000  | 1.370419000  | 2.231825000  |
| 8  | 6.353976000   | -2.688765000 | -0.468419000 |
| 6  | 5.545958000   | 2.097724000  | -0.297634000 |
| 6  | 4.505541000   | 2.368472000  | -1.236312000 |
| 7  | 3.705675000   | 2.655330000  | -2.033801000 |
| 6  | 6.193420000   | 3.281979000  | 0.167956000  |
| 7  | 6.685054000   | 4.269326000  | 0.545106000  |
| 1  | -11.239112000 | -0.088769000 | 1.849284000  |
| 1  | -11.149744000 | 1.674646000  | 1.283625000  |

S8TIIDS0-T1 E=-2623.829744 Hartree

|    |               |              |              |
|----|---------------|--------------|--------------|
| 6  | -7.646025000  | 1.335544000  | 0.239833000  |
| 6  | -6.978066000  | 0.067759000  | 0.372891000  |
| 6  | -7.725636000  | -1.008637000 | 0.912685000  |
| 6  | -9.044073000  | -0.825306000 | 1.262241000  |
| 6  | -9.716533000  | 0.435913000  | 1.102228000  |
| 6  | -8.957295000  | 1.537123000  | 0.574452000  |
| 6  | -5.492256000  | 1.711568000  | -0.422771000 |
| 6  | -5.605726000  | 0.247315000  | -0.029857000 |
| 1  | -7.258765000  | -1.975100000 | 1.023759000  |
| 1  | -9.609138000  | -1.658115000 | 1.669902000  |
| 1  | -9.429015000  | 2.507045000  | 0.457517000  |
| 6  | -4.541715000  | -0.646079000 | -0.126631000 |
| 6  | -3.104668000  | -0.428245000 | -0.285940000 |
| 6  | -4.716995000  | -2.145772000 | -0.126644000 |
| 6  | -2.487248000  | -1.709715000 | -0.368294000 |
| 6  | -2.264198000  | 0.694918000  | -0.285441000 |
| 6  | -1.119880000  | -1.885988000 | -0.474086000 |
| 6  | -0.885275000  | 0.533279000  | -0.388241000 |
| 1  | -2.689002000  | 1.685406000  | -0.237742000 |
| 6  | -0.292261000  | -0.741258000 | -0.490833000 |
| 1  | -0.690137000  | -2.880292000 | -0.503167000 |
| 1  | -0.259201000  | 1.418652000  | -0.430850000 |
| 8  | -5.736620000  | -2.820438000 | -0.052593000 |
| 8  | -4.533658000  | 2.332157000  | -0.858187000 |
| 7  | -3.454334000  | -2.701208000 | -0.291886000 |
| 7  | -6.746520000  | 2.273914000  | -0.250275000 |
| 6  | -7.042134000  | 3.659720000  | -0.546801000 |
| 1  | -7.823486000  | 3.735928000  | -1.310424000 |
| 1  | -7.371101000  | 4.190340000  | 0.353362000  |
| 1  | -6.124812000  | 4.114619000  | -0.920813000 |
| 6  | -3.219869000  | -4.127723000 | -0.364627000 |
| 1  | -2.753025000  | -4.398208000 | -1.317845000 |
| 1  | -2.574675000  | -4.461734000 | 0.455469000  |
| 1  | -4.189610000  | -4.619271000 | -0.285079000 |
| 6  | -11.047717000 | 0.581762000  | 1.452485000  |
| 6  | 1.150788000   | -0.898431000 | -0.610358000 |
| 6  | 1.854604000   | -1.973001000 | -1.154888000 |
| 16 | 2.248152000   | 0.328863000  | -0.034879000 |
| 6  | 3.239513000   | -1.817088000 | -1.115176000 |
| 1  | 1.362280000   | -2.827402000 | -1.602111000 |
| 6  | 3.656109000   | -0.598387000 | -0.547334000 |

|    |               |              |              |
|----|---------------|--------------|--------------|
| 1  | 3.944929000   | -2.533540000 | -1.518314000 |
| 6  | 4.993389000   | -0.239430000 | -0.272802000 |
| 6  | 5.641264000   | 0.991382000  | -0.005050000 |
| 6  | 7.383147000   | -0.547649000 | 0.679358000  |
| 6  | 6.971602000   | 0.793560000  | 0.645604000  |
| 6  | 8.600275000   | -0.970880000 | 1.188815000  |
| 6  | 7.848518000   | 1.748152000  | 1.180683000  |
| 6  | 9.458366000   | -0.002975000 | 1.714074000  |
| 1  | 8.868253000   | -2.022105000 | 1.182731000  |
| 6  | 9.074769000   | 1.339889000  | 1.710061000  |
| 1  | 7.593031000   | 2.797639000  | 1.200597000  |
| 1  | 10.417602000  | -0.296081000 | 2.128149000  |
| 1  | 9.739925000   | 2.089914000  | 2.126070000  |
| 6  | 5.151738000   | 2.245877000  | -0.425252000 |
| 6  | 5.691737000   | 3.493498000  | -0.005644000 |
| 7  | 6.084539000   | 4.541551000  | 0.324650000  |
| 6  | 4.144194000   | 2.393689000  | -1.421075000 |
| 7  | 3.361270000   | 2.578691000  | -2.265320000 |
| 16 | 6.139929000   | -1.624984000 | 0.002901000  |
| 8  | 5.616846000   | -2.519529000 | 1.045406000  |
| 8  | 6.561686000   | -2.207946000 | -1.281651000 |
| 1  | -11.615829000 | -0.249949000 | 1.854423000  |
| 1  | -11.562883000 | 1.529293000  | 1.336063000  |

**S9TIIDS0-T1** E=-2609.767442 Hartree

|   |             |              |              |
|---|-------------|--------------|--------------|
| 6 | 6.964506000 | -1.459750000 | -0.046216000 |
| 6 | 6.334671000 | -0.189484000 | 0.187787000  |
| 6 | 7.141455000 | 0.843536000  | 0.722092000  |
| 6 | 8.477870000 | 0.618629000  | 0.972650000  |
| 6 | 9.110508000 | -0.644575000 | 0.712099000  |
| 6 | 8.291845000 | -1.702885000 | 0.189084000  |
| 6 | 4.760985000 | -1.766168000 | -0.575952000 |
| 6 | 4.929764000 | -0.327295000 | -0.129876000 |
| 1 | 6.706149000 | 1.812999000  | 0.908963000  |
| 1 | 9.086595000 | 1.421840000  | 1.377399000  |
| 1 | 8.731056000 | -2.676197000 | -0.003520000 |
| 6 | 3.878806000 | 0.584712000  | -0.112346000 |
| 6 | 2.432379000 | 0.404505000  | -0.193803000 |
| 6 | 4.085462000 | 2.082388000  | -0.042832000 |
| 6 | 1.836081000 | 1.696795000  | -0.164834000 |
| 6 | 1.562534000 | -0.697528000 | -0.203928000 |
| 6 | 0.470625000 | 1.907379000  | -0.171708000 |
| 6 | 0.185508000 | -0.501609000 | -0.213177000 |

|    |               |              |              |
|----|---------------|--------------|--------------|
| 1  | 1.965078000   | -1.698191000 | -0.232825000 |
| 6  | -0.392015000  | 0.786211000  | -0.207008000 |
| 1  | 0.070128000   | 2.912866000  | -0.120272000 |
| 1  | -0.459031000  | -1.374070000 | -0.252657000 |
| 8  | 5.122123000   | 2.734291000  | 0.000506000  |
| 8  | 3.764453000   | -2.355640000 | -0.972059000 |
| 7  | 2.828752000   | 2.667641000  | -0.094404000 |
| 7  | 6.013820000   | -2.358198000 | -0.515072000 |
| 6  | 6.258744000   | -3.733361000 | -0.890070000 |
| 1  | 6.985005000   | -3.791572000 | -1.708199000 |
| 1  | 6.637354000   | -4.310446000 | -0.038921000 |
| 1  | 5.308065000   | -4.153639000 | -1.218989000 |
| 6  | 2.620648000   | 4.098578000  | -0.074369000 |
| 1  | 2.096825000   | 4.429994000  | -0.977765000 |
| 1  | 2.037544000   | 4.399250000  | 0.803495000  |
| 1  | 3.603777000   | 4.568119000  | -0.033664000 |
| 6  | 10.461311000  | -0.833521000 | 0.964192000  |
| 6  | -1.832647000  | 0.976855000  | -0.231794000 |
| 6  | -2.553384000  | 2.134171000  | -0.503858000 |
| 16 | -2.942397000  | -0.353123000 | 0.110354000  |
| 6  | -3.943479000  | 1.986789000  | -0.452849000 |
| 1  | -2.072739000  | 3.070409000  | -0.762517000 |
| 6  | -4.360288000  | 0.678993000  | -0.131709000 |
| 1  | -4.641480000  | 2.791391000  | -0.652475000 |
| 6  | -5.662164000  | 0.195056000  | -0.002581000 |
| 16 | -6.034539000  | -1.484236000 | 0.392548000  |
| 16 | -7.069460000  | 1.243072000  | -0.224353000 |
| 6  | -7.792762000  | -1.299469000 | 0.345913000  |
| 6  | -8.279828000  | -0.015542000 | 0.054428000  |
| 6  | -8.680068000  | -2.352149000 | 0.583012000  |
| 6  | -9.656103000  | 0.218449000  | -0.000681000 |
| 6  | -10.052488000 | -2.113372000 | 0.527101000  |
| 1  | -8.302270000  | -3.344508000 | 0.807839000  |
| 6  | -10.537695000 | -0.835190000 | 0.236860000  |
| 1  | -10.032630000 | 1.211074000  | -0.226551000 |
| 1  | -10.744298000 | -2.929120000 | 0.710664000  |
| 1  | -11.607246000 | -0.656130000 | 0.194512000  |
| 1  | 11.074109000  | -0.032699000 | 1.363188000  |
| 1  | 10.945040000  | -1.784976000 | 0.770496000  |

**S10TIIDS0-T1** E=-2456.108883 Hartree

|   |             |             |              |
|---|-------------|-------------|--------------|
| 6 | 0.733272000 | 1.597751000 | -0.196328000 |
| 6 | 1.397040000 | 0.338378000 | -0.187716000 |

|    |              |              |              |
|----|--------------|--------------|--------------|
| 6  | 0.586475000  | -0.807426000 | -0.145887000 |
| 6  | -0.798866000 | -0.684464000 | -0.141943000 |
| 6  | -1.444008000 | 0.570649000  | -0.173280000 |
| 6  | -0.641310000 | 1.736019000  | -0.190713000 |
| 6  | 2.960426000  | 2.105030000  | -0.121716000 |
| 6  | 2.832457000  | 0.596987000  | -0.134127000 |
| 1  | 1.041081000  | -1.785979000 | -0.145012000 |
| 1  | -1.396627000 | -1.590498000 | -0.140669000 |
| 1  | -1.093674000 | 2.720394000  | -0.169668000 |
| 6  | 3.930149000  | -0.258782000 | -0.133995000 |
| 6  | 5.329527000  | -0.035704000 | 0.158077000  |
| 6  | 3.832284000  | -1.719807000 | -0.525233000 |
| 6  | 6.023020000  | -1.278846000 | -0.039020000 |
| 6  | 6.087175000  | 1.057331000  | 0.642750000  |
| 6  | 7.364303000  | -1.442928000 | 0.185293000  |
| 6  | 7.436722000  | 0.912490000  | 0.881481000  |
| 1  | 5.603394000  | 2.008757000  | 0.800889000  |
| 6  | 8.132309000  | -0.324422000 | 0.657491000  |
| 1  | 7.852076000  | -2.398244000 | 0.021550000  |
| 1  | 8.007034000  | 1.761031000  | 1.247893000  |
| 8  | 2.863579000  | -2.375245000 | -0.885269000 |
| 8  | 3.961544000  | 2.811664000  | -0.117344000 |
| 7  | 5.115491000  | -2.242639000 | -0.461145000 |
| 7  | 1.673918000  | 2.621303000  | -0.175419000 |
| 6  | 1.390557000  | 4.039079000  | -0.203416000 |
| 1  | 0.838511000  | 4.309510000  | -1.110328000 |
| 1  | 0.803422000  | 4.340424000  | 0.671534000  |
| 1  | 2.347850000  | 4.560783000  | -0.193757000 |
| 6  | 5.428269000  | -3.615836000 | -0.789880000 |
| 1  | 6.146532000  | -3.665810000 | -1.615596000 |
| 1  | 5.847333000  | -4.140749000 | 0.075972000  |
| 1  | 4.497211000  | -4.097182000 | -1.089985000 |
| 6  | -2.892701000 | 0.684253000  | -0.183756000 |
| 6  | -3.677947000 | 1.791393000  | -0.482335000 |
| 16 | -3.926360000 | -0.690830000 | 0.216490000  |
| 6  | -5.058041000 | 1.571789000  | -0.406707000 |
| 1  | -3.251891000 | 2.743182000  | -0.777407000 |
| 6  | -5.399630000 | 0.255941000  | -0.037837000 |
| 1  | -5.800613000 | 2.331419000  | -0.621518000 |
| 6  | 9.494310000  | -0.432560000 | 0.896238000  |
| 6  | -6.672554000 | -0.293790000 | 0.126168000  |
| 16 | -6.960734000 | -1.978089000 | 0.581330000  |
| 16 | -8.147754000 | 0.658428000  | -0.110329000 |
| 6  | -8.712509000 | -1.852048000 | 0.557732000  |

|   |               |              |             |
|---|---------------|--------------|-------------|
| 6 | -9.246986000  | -0.664137000 | 0.245511000 |
| 1 | -10.308648000 | -0.455966000 | 0.196990000 |
| 1 | -9.278912000  | -2.743139000 | 0.798158000 |
| 1 | 10.068775000  | 0.413596000  | 1.256870000 |
| 1 | 10.025405000  | -1.363732000 | 0.729977000 |

S2IIDS1-CS E=-1483.164593 Hartree

|   |              |              |              |
|---|--------------|--------------|--------------|
| 6 | -2.075780000 | 1.162768000  | -0.358069000 |
| 6 | -1.216257000 | 0.005217000  | -0.191519000 |
| 6 | -1.850322000 | -1.224137000 | 0.162423000  |
| 6 | -3.206447000 | -1.275516000 | 0.314892000  |
| 6 | -4.069609000 | -0.130047000 | 0.122002000  |
| 6 | -3.432830000 | 1.112784000  | -0.223629000 |
| 6 | 0.061762000  | 1.892403000  | -0.656428000 |
| 6 | 0.110043000  | 0.416962000  | -0.362390000 |
| 1 | -1.253319000 | -2.117031000 | 0.276913000  |
| 1 | -3.647222000 | -2.232494000 | 0.558937000  |
| 1 | -4.012844000 | 2.017695000  | -0.341495000 |
| 6 | 1.329174000  | -0.326898000 | -0.337041000 |
| 6 | 2.640867000  | 0.072771000  | -0.088737000 |
| 6 | 1.391060000  | -1.801850000 | -0.671667000 |
| 6 | 3.506754000  | -1.088841000 | -0.237669000 |
| 6 | 3.252480000  | 1.302756000  | 0.323066000  |
| 6 | 4.851969000  | -1.048850000 | -0.029298000 |
| 6 | 4.595462000  | 1.355908000  | 0.541141000  |
| 1 | 2.642182000  | 2.187543000  | 0.431094000  |
| 6 | 5.447287000  | 0.197099000  | 0.369916000  |
| 1 | 5.474563000  | -1.927688000 | -0.149051000 |
| 1 | 5.056532000  | 2.287555000  | 0.849583000  |
| 8 | 0.487671000  | -2.561301000 | -0.981261000 |
| 8 | 0.974507000  | 2.668209000  | -0.896249000 |
| 7 | 2.731228000  | -2.173728000 | -0.597117000 |
| 7 | -1.285190000 | 2.258887000  | -0.644165000 |
| 6 | -1.744461000 | 3.607753000  | -0.906291000 |
| 1 | -2.403830000 | 3.632875000  | -1.780116000 |
| 1 | -2.279090000 | 4.014244000  | -0.041169000 |
| 1 | -0.861859000 | 4.216691000  | -1.103499000 |
| 6 | 3.207154000  | -3.516795000 | -0.867763000 |
| 1 | 3.914478000  | -3.517073000 | -1.702986000 |
| 1 | 3.695366000  | -3.941935000 | 0.015042000  |
| 1 | 2.338702000  | -4.121731000 | -1.128850000 |
| 6 | 6.823656000  | 0.289765000  | 0.598626000  |



|   |              |              |              |
|---|--------------|--------------|--------------|
| 6 | 7.441966000  | 1.507191000  | 1.004089000  |
| 7 | 7.942329000  | 2.505884000  | 1.337259000  |
| 6 | 7.678796000  | -0.838350000 | 0.438794000  |
| 7 | 8.357232000  | -1.776460000 | 0.302037000  |
| 6 | -5.473954000 | -0.230136000 | 0.270453000  |
| 6 | -6.109075000 | -1.427749000 | 0.781278000  |
| 6 | -6.355751000 | 0.864694000  | -0.079426000 |
| 6 | -7.452516000 | -1.525937000 | 0.936315000  |
| 1 | -5.493414000 | -2.267564000 | 1.078813000  |
| 6 | -7.702168000 | 0.784024000  | 0.055486000  |
| 1 | -5.932042000 | 1.772107000  | -0.492831000 |
| 6 | -8.356485000 | -0.423118000 | 0.581281000  |
| 1 | -7.913659000 | -2.423605000 | 1.335551000  |
| 1 | -8.352324000 | 1.606119000  | -0.226360000 |
| 8 | -9.580686000 | -0.503285000 | 0.714426000  |

**S2IIDS3-CS** E=-2051.014759 Hartree

|   |              |              |              |
|---|--------------|--------------|--------------|
| 6 | -3.688157000 | -1.112011000 | 0.428203000  |
| 6 | -2.909035000 | 0.088257000  | 0.205886000  |
| 6 | -3.614199000 | 1.233927000  | -0.264841000 |
| 6 | -4.967888000 | 1.177732000  | -0.452418000 |
| 6 | -5.750961000 | -0.011155000 | -0.208760000 |
| 6 | -5.039161000 | -1.176582000 | 0.238024000  |
| 6 | -1.522395000 | -1.661858000 | 0.872356000  |
| 6 | -1.559029000 | -0.211157000 | 0.461245000  |
| 1 | -3.075880000 | 2.151530000  | -0.450089000 |
| 1 | -5.458753000 | 2.064978000  | -0.828772000 |
| 1 | -5.562911000 | -2.098204000 | 0.451413000  |
| 6 | -0.398716000 | 0.609947000  | 0.428965000  |
| 6 | 0.963242000  | 0.282577000  | 0.312200000  |
| 6 | -0.455306000 | 2.111037000  | 0.591879000  |
| 6 | 1.730802000  | 1.508965000  | 0.381893000  |
| 6 | 1.685808000  | -0.925432000 | 0.081502000  |
| 6 | 3.091576000  | 1.550197000  | 0.265037000  |
| 6 | 3.047864000  | -0.894347000 | -0.043128000 |
| 1 | 1.152300000  | -1.863213000 | 0.033266000  |
| 6 | 3.805982000  | 0.324896000  | 0.049821000  |
| 1 | 3.617208000  | 2.494626000  | 0.326317000  |
| 1 | 3.578246000  | -1.825279000 | -0.214347000 |
| 8 | -1.421998000 | 2.839843000  | 0.754600000  |
| 8 | -0.572606000 | -2.352392000 | 1.210567000  |
| 7 | 0.860576000  | 2.567908000  | 0.563938000  |
| 7 | -2.838143000 | -2.120943000 | 0.841820000  |

|    |               |              |              |
|----|---------------|--------------|--------------|
| 6  | -3.216282000  | -3.474949000 | 1.191929000  |
| 1  | -3.909280000  | -3.479853000 | 2.039697000  |
| 1  | -3.685335000  | -3.982209000 | 0.342097000  |
| 1  | -2.304204000  | -4.003771000 | 1.469424000  |
| 6  | 1.222284000   | 3.963535000  | 0.708570000  |
| 1  | 1.864931000   | 4.111378000  | 1.582653000  |
| 1  | 1.740981000   | 4.328097000  | -0.184476000 |
| 1  | 0.297440000   | 4.524887000  | 0.842914000  |
| 6  | 5.206877000   | 0.316281000  | -0.074504000 |
| 6  | 6.096905000   | 1.430943000  | -0.005070000 |
| 16 | 6.182149000   | -1.125439000 | -0.353234000 |
| 1  | 5.756654000   | 2.447411000  | 0.162295000  |
| 6  | 7.640595000   | -0.107651000 | -0.349378000 |
| 6  | 8.918663000   | -0.616725000 | -0.533135000 |
| 6  | 9.123836000   | -2.008727000 | -0.739165000 |
| 7  | 9.262715000   | -3.154147000 | -0.906433000 |
| 6  | 10.054705000  | 0.240918000  | -0.520827000 |
| 7  | 11.005031000  | 0.914493000  | -0.516716000 |
| 7  | 7.383630000   | 1.213343000  | -0.149652000 |
| 6  | -7.155104000  | -0.027569000 | -0.412370000 |
| 6  | -7.901607000  | 1.179771000  | -0.694465000 |
| 6  | -7.919109000  | -1.254841000 | -0.345776000 |
| 6  | -9.245408000  | 1.174285000  | -0.880949000 |
| 1  | -7.380144000  | 2.128487000  | -0.727512000 |
| 6  | -9.260919000  | -1.286226000 | -0.541584000 |
| 1  | -7.402530000  | -2.189545000 | -0.162946000 |
| 6  | -10.030496000 | -0.065927000 | -0.822243000 |
| 1  | -9.795219000  | 2.089737000  | -1.074605000 |
| 1  | -9.819326000  | -2.216197000 | -0.505398000 |
| 8  | -11.252573000 | -0.083585000 | -0.996951000 |

**S2IIDS4-CS** E=-2017.042434 Hartree

|   |              |              |              |
|---|--------------|--------------|--------------|
| 6 | -2.281773000 | -1.123070000 | 0.399466000  |
| 6 | -1.424681000 | 0.041166000  | 0.254975000  |
| 6 | -2.055862000 | 1.275171000  | -0.107452000 |
| 6 | -3.405659000 | 1.321367000  | -0.280410000 |
| 6 | -4.259142000 | 0.159279000  | -0.112967000 |
| 6 | -3.632951000 | -1.094345000 | 0.235503000  |
| 6 | -0.147187000 | -1.838189000 | 0.751447000  |
| 6 | -0.102083000 | -0.358887000 | 0.454556000  |
| 1 | -1.456106000 | 2.167429000  | -0.213528000 |
| 1 | -3.864497000 | 2.266636000  | -0.551539000 |
| 1 | -4.248234000 | -1.975041000 | 0.352113000  |

|    |              |              |              |
|----|--------------|--------------|--------------|
| 6  | 1.113572000  | 0.392586000  | 0.456787000  |
| 6  | 2.436618000  | -0.006312000 | 0.239514000  |
| 6  | 1.163139000  | 1.863452000  | 0.775991000  |
| 6  | 3.294351000  | 1.152800000  | 0.397652000  |
| 6  | 3.068916000  | -1.226028000 | -0.150679000 |
| 6  | 4.646449000  | 1.115628000  | 0.218409000  |
| 6  | 4.419890000  | -1.265275000 | -0.347091000 |
| 1  | 2.473509000  | -2.121332000 | -0.255622000 |
| 6  | 5.281289000  | -0.116749000 | -0.166895000 |
| 1  | 5.223656000  | 2.023177000  | 0.330724000  |
| 1  | 4.859808000  | -2.215825000 | -0.617055000 |
| 8  | 0.254771000  | 2.630918000  | 1.059387000  |
| 8  | 0.768777000  | -2.604546000 | 1.013600000  |
| 7  | 2.506180000  | 2.239933000  | 0.726184000  |
| 7  | -1.486611000 | -2.213402000 | 0.708377000  |
| 6  | -1.947949000 | -3.563790000 | 0.959180000  |
| 1  | -2.630383000 | -3.589303000 | 1.814770000  |
| 1  | -2.463330000 | -3.969063000 | 0.082226000  |
| 1  | -1.068974000 | -4.170671000 | 1.177624000  |
| 6  | 2.965241000  | 3.586442000  | 0.995987000  |
| 1  | 3.653825000  | 3.601789000  | 1.847418000  |
| 1  | 3.468588000  | 4.012103000  | 0.121140000  |
| 1  | 2.085763000  | 4.185685000  | 1.233216000  |
| 6  | -5.630976000 | 0.267798000  | -0.293517000 |
| 6  | -6.614803000 | -0.831211000 | -0.160727000 |
| 16 | -6.450726000 | 1.774209000  | -0.724787000 |
| 6  | -8.070843000 | 0.967187000  | -0.732306000 |
| 7  | -7.911475000 | -0.368489000 | -0.413683000 |
| 8  | -9.107344000 | 1.535395000  | -0.979988000 |
| 8  | -6.400636000 | -2.002041000 | 0.125169000  |
| 6  | -9.052616000 | -1.276260000 | -0.342624000 |
| 1  | -8.936850000 | -2.077628000 | -1.075759000 |
| 1  | -9.111430000 | -1.718963000 | 0.653925000  |
| 1  | -9.949653000 | -0.696608000 | -0.554365000 |
| 6  | 6.681213000  | -0.202319000 | -0.363769000 |
| 6  | 7.308783000  | -1.384827000 | -0.914633000 |
| 6  | 7.566324000  | 0.892439000  | -0.026575000 |
| 6  | 8.647702000  | -1.469354000 | -1.116501000 |
| 1  | 6.690107000  | -2.225170000 | -1.205144000 |
| 6  | 8.908749000  | 0.825061000  | -0.208359000 |
| 1  | 7.150566000  | 1.789979000  | 0.416034000  |
| 6  | 9.555071000  | -0.366386000 | -0.775183000 |
| 1  | 9.101090000  | -2.357221000 | -1.545686000 |
| 1  | 9.560871000  | 1.648536000  | 0.065175000  |

|                   |                        |              |              |              |
|-------------------|------------------------|--------------|--------------|--------------|
|                   | 8                      | 10.775924000 | -0.434273000 | -0.951156000 |
| <b>S2IIDS5-CS</b> | E=-1788.495327 Hartree |              |              |              |
|                   | 6                      | 1.900795000  | 1.198845000  | 0.270580000  |
|                   | 6                      | 1.055505000  | 0.020741000  | 0.257728000  |
|                   | 6                      | 1.704521000  | -1.232417000 | 0.041065000  |
|                   | 6                      | 3.059383000  | -1.292660000 | -0.128652000 |
|                   | 6                      | 3.907761000  | -0.119675000 | -0.077182000 |
|                   | 6                      | 3.255415000  | 1.150153000  | 0.124164000  |
|                   | 6                      | -0.236034000 | 1.944571000  | 0.503887000  |
|                   | 6                      | -0.274360000 | 0.434615000  | 0.392245000  |
|                   | 1                      | 1.118525000  | -2.139912000 | 0.039311000  |
|                   | 1                      | 3.535773000  | -2.245932000 | -0.295497000 |
|                   | 1                      | 3.815693000  | 2.074758000  | 0.112560000  |
|                   | 6                      | -1.483551000 | -0.312486000 | 0.475576000  |
|                   | 6                      | -2.812002000 | 0.054810000  | 0.214051000  |
|                   | 6                      | -1.527455000 | -1.738987000 | 0.960111000  |
|                   | 6                      | -3.661231000 | -1.085229000 | 0.499310000  |
|                   | 6                      | -3.449704000 | 1.219092000  | -0.307524000 |
|                   | 6                      | -5.014937000 | -1.074310000 | 0.321002000  |
|                   | 6                      | -4.804976000 | 1.237571000  | -0.482977000 |
|                   | 1                      | -2.857597000 | 2.091847000  | -0.540276000 |
|                   | 6                      | -5.657970000 | 0.110969000  | -0.176937000 |
|                   | 1                      | -5.592526000 | -1.950509000 | 0.581394000  |
|                   | 1                      | -5.244432000 | 2.134404000  | -0.898003000 |
|                   | 8                      | -0.616831000 | -2.463259000 | 1.330087000  |
|                   | 8                      | -1.155987000 | 2.731007000  | 0.662299000  |
|                   | 7                      | -2.869814000 | -2.121240000 | 0.956612000  |
|                   | 7                      | 1.102253000  | 2.318440000  | 0.427653000  |
|                   | 6                      | 1.554366000  | 3.692507000  | 0.518152000  |
|                   | 1                      | 2.227832000  | 3.825534000  | 1.371017000  |
|                   | 1                      | 2.071904000  | 3.994954000  | -0.398289000 |
|                   | 1                      | 0.670882000  | 4.316100000  | 0.656054000  |
|                   | 6                      | -3.324046000 | -3.430819000 | 1.378011000  |
|                   | 1                      | -4.007197000 | -3.351961000 | 2.230155000  |
|                   | 1                      | -3.830805000 | -3.951403000 | 0.558453000  |
|                   | 1                      | -2.441787000 | -3.998239000 | 1.675194000  |
|                   | 6                      | 5.320310000  | -0.192750000 | -0.207443000 |
|                   | 6                      | 6.022546000  | -1.438657000 | -0.635571000 |
|                   | 6                      | 6.137409000  | 0.939719000  | 0.073512000  |
|                   | 6                      | 7.500641000  | 0.930581000  | -0.030910000 |
|                   | 1                      | 5.678051000  | 1.854945000  | 0.423162000  |
|                   | 6                      | 8.231560000  | -0.274003000 | -0.460124000 |

|   |               |              |              |
|---|---------------|--------------|--------------|
| 6 | 8.265091000   | 2.090584000  | 0.287393000  |
| 7 | 8.848329000   | 3.061890000  | 0.555026000  |
| 8 | 5.465685000   | -2.492903000 | -0.928790000 |
| 8 | 9.448008000   | -0.308973000 | -0.571155000 |
| 7 | 7.421748000   | -1.387138000 | -0.728627000 |
| 6 | 8.080269000   | -2.625769000 | -1.163668000 |
| 1 | 7.843804000   | -3.433456000 | -0.468512000 |
| 1 | 7.717714000   | -2.909851000 | -2.153456000 |
| 1 | 9.150466000   | -2.437757000 | -1.185589000 |
| 6 | -7.060715000  | 0.172492000  | -0.370801000 |
| 6 | -7.733585000  | 1.408240000  | -0.712709000 |
| 6 | -7.899987000  | -0.999480000 | -0.233977000 |
| 6 | -9.076401000  | 1.477259000  | -0.890335000 |
| 1 | -7.154483000  | 2.319216000  | -0.800348000 |
| 6 | -9.242508000  | -0.956530000 | -0.419281000 |
| 1 | -7.441370000  | -1.953711000 | -0.003963000 |
| 6 | -9.936976000  | 0.293508000  | -0.760253000 |
| 1 | -9.569874000  | 2.413748000  | -1.129721000 |
| 1 | -9.857859000  | -1.846052000 | -0.329510000 |
| 8 | -11.159016000 | 0.343463000  | -0.926122000 |

**S2IIDS6-CS** E=-2149.814907 Hartree

|   |              |              |              |
|---|--------------|--------------|--------------|
| 6 | 3.948676000  | -1.122956000 | -0.481741000 |
| 6 | 3.124767000  | 0.045965000  | -0.235079000 |
| 6 | 3.791816000  | 1.219640000  | 0.229276000  |
| 6 | 5.145819000  | 1.211842000  | 0.407853000  |
| 6 | 5.974371000  | 0.056995000  | 0.136124000  |
| 6 | 5.303949000  | -1.130751000 | -0.320830000 |
| 6 | 1.794224000  | -1.751538000 | -0.877349000 |
| 6 | 1.788669000  | -0.304497000 | -0.460158000 |
| 1 | 3.221729000  | 2.119926000  | 0.406385000  |
| 1 | 5.613035000  | 2.129916000  | 0.737279000  |
| 1 | 5.856064000  | -2.042459000 | -0.502998000 |
| 6 | 0.594238000  | 0.473083000  | -0.385925000 |
| 6 | -0.732540000 | 0.098082000  | -0.184961000 |
| 6 | 0.582047000  | 1.976283000  | -0.590000000 |
| 6 | -1.558181000 | 1.290574000  | -0.239196000 |
| 6 | -1.404955000 | -1.131346000 | 0.107372000  |
| 6 | -2.906158000 | 1.291984000  | -0.047863000 |
| 6 | -2.749663000 | -1.147178000 | 0.322879000  |
| 1 | -0.842070000 | -2.053321000 | 0.125599000  |
| 6 | -3.580577000 | 0.052683000  | 0.262732000  |
| 1 | -3.478553000 | 2.204569000  | -0.089618000 |

|    |              |              |              |
|----|--------------|--------------|--------------|
| 1  | -3.231501000 | -2.084421000 | 0.548399000  |
| 8  | 1.516093000  | 2.727038000  | -0.823743000 |
| 8  | 0.862907000  | -2.471460000 | -1.201614000 |
| 7  | -0.743083000 | 2.381347000  | -0.494640000 |
| 7  | 3.128608000  | -2.164182000 | -0.870593000 |
| 6  | 3.548715000  | -3.500922000 | -1.237775000 |
| 1  | 4.222978000  | -3.475778000 | -2.100274000 |
| 1  | 4.053971000  | -3.996083000 | -0.401637000 |
| 1  | 2.650446000  | -4.060982000 | -1.498959000 |
| 6  | -1.176706000 | 3.756520000  | -0.646840000 |
| 1  | -1.873277000 | 3.852850000  | -1.485438000 |
| 1  | -1.667741000 | 4.111418000  | 0.264767000  |
| 1  | -0.288454000 | 4.357892000  | -0.841077000 |
| 6  | -4.980388000 | -0.012423000 | 0.442088000  |
| 6  | -5.845032000 | 1.158719000  | 0.207610000  |
| 6  | -5.639767000 | -1.257416000 | 0.880074000  |
| 6  | -7.823882000 | -0.338868000 | 0.153596000  |
| 8  | -5.066016000 | -2.188342000 | 1.435707000  |
| 7  | -7.027715000 | -1.362754000 | 0.628220000  |
| 6  | -7.656433000 | -2.660373000 | 0.926620000  |
| 1  | -6.878578000 | -3.314194000 | 1.309111000  |
| 1  | -8.445819000 | -2.527899000 | 1.668049000  |
| 1  | -8.101714000 | -3.069598000 | 0.019038000  |
| 8  | -5.452485000 | 2.320976000  | 0.144152000  |
| 7  | -7.221949000 | 0.898108000  | 0.013484000  |
| 6  | -8.063833000 | 2.044986000  | -0.366776000 |
| 1  | -8.860721000 | 2.176794000  | 0.366454000  |
| 1  | -7.422166000 | 2.920056000  | -0.397462000 |
| 1  | -8.519491000 | 1.860250000  | -1.340397000 |
| 16 | -9.445508000 | -0.571929000 | -0.189560000 |
| 6  | 7.378454000  | 0.096339000  | 0.316110000  |
| 6  | 8.230391000  | -0.996526000 | -0.105255000 |
| 6  | 8.042751000  | 1.226389000  | 0.932044000  |
| 6  | 9.576025000  | -0.973472000 | 0.058750000  |
| 1  | 7.785306000  | -1.853174000 | -0.597144000 |
| 6  | 9.385636000  | 1.265551000  | 1.117113000  |
| 1  | 7.449627000  | 2.060816000  | 1.285422000  |
| 6  | 10.259563000 | 0.164295000  | 0.690523000  |
| 1  | 10.203830000 | -1.792750000 | -0.276927000 |
| 1  | 9.868016000  | 2.112400000  | 1.594660000  |
| 8  | 11.483275000 | 0.191415000  | 0.850290000  |

**S2IIDS7-CS**

E=-1903.755998 Hartree

|   |              |              |             |
|---|--------------|--------------|-------------|
| 6 | -4.173639000 | -1.030489000 | 0.657438000 |
|---|--------------|--------------|-------------|

|   |              |              |              |
|---|--------------|--------------|--------------|
| 6 | -3.275545000 | 0.004262000  | 0.181230000  |
| 6 | -3.860235000 | 1.074612000  | -0.559669000 |
| 6 | -5.208579000 | 1.099803000  | -0.778660000 |
| 6 | -6.110748000 | 0.084995000  | -0.280415000 |
| 6 | -5.523608000 | -1.001237000 | 0.456422000  |
| 6 | -2.070794000 | -1.672110000 | 1.257192000  |
| 6 | -1.966692000 | -0.358245000 | 0.526628000  |
| 1 | -3.233934000 | 1.878851000  | -0.916811000 |
| 1 | -5.611999000 | 1.942722000  | -1.323141000 |
| 1 | -6.133556000 | -1.816125000 | 0.821320000  |
| 6 | -0.728102000 | 0.318152000  | 0.326893000  |
| 6 | 0.583534000  | -0.159470000 | 0.282151000  |
| 6 | -0.635633000 | 1.823574000  | 0.169724000  |
| 6 | 1.469008000  | 0.973392000  | 0.076413000  |
| 6 | 1.182480000  | -1.459632000 | 0.299571000  |
| 6 | 2.819714000  | 0.850997000  | -0.056893000 |
| 6 | 2.532939000  | -1.594681000 | 0.164441000  |
| 1 | 0.559203000  | -2.328709000 | 0.451794000  |
| 6 | 3.418917000  | -0.450790000 | 0.035229000  |
| 1 | 3.428658000  | 1.719568000  | -0.261461000 |
| 1 | 2.983182000  | -2.577038000 | 0.179573000  |
| 8 | -1.527964000 | 2.655727000  | 0.199172000  |
| 8 | -1.193108000 | -2.352951000 | 1.763580000  |
| 7 | 0.711978000  | 2.128402000  | 0.016535000  |
| 7 | -3.427547000 | -1.999615000 | 1.299366000  |
| 6 | -3.936907000 | -3.192487000 | 1.944305000  |
| 1 | -4.626753000 | -2.934193000 | 2.754538000  |
| 1 | -4.453482000 | -3.836574000 | 1.224623000  |
| 1 | -3.080677000 | -3.726734000 | 2.356831000  |
| 6 | 1.227915000  | 3.483147000  | -0.055417000 |
| 1 | 1.935378000  | 3.662005000  | 0.759885000  |
| 1 | 1.725996000  | 3.661124000  | -1.014306000 |
| 1 | 0.378395000  | 4.159761000  | 0.038370000  |
| 6 | 4.807372000  | -0.642095000 | -0.063179000 |
| 6 | 5.432766000  | -1.930291000 | -0.521022000 |
| 6 | 5.882728000  | 0.337019000  | 0.029313000  |
| 6 | 6.810657000  | -1.583585000 | -0.947276000 |
| 6 | 7.070547000  | -0.230919000 | -0.665411000 |
| 6 | 7.746173000  | -2.412619000 | -1.550448000 |
| 6 | 8.306508000  | 0.316646000  | -1.022046000 |
| 6 | 8.980071000  | -1.861794000 | -1.902872000 |
| 1 | 7.504639000  | -3.454144000 | -1.736297000 |
| 6 | 9.246177000  | -0.511714000 | -1.645522000 |
| 1 | 8.548671000  | 1.354686000  | -0.839541000 |

|   |               |              |              |
|---|---------------|--------------|--------------|
| 1 | 9.735632000   | -2.477828000 | -2.380545000 |
| 1 | 10.205118000  | -0.092097000 | -1.933772000 |
| 8 | 4.935791000   | -3.045482000 | -0.590335000 |
| 6 | 5.910952000   | 1.499971000  | 0.787701000  |
| 6 | 4.895939000   | 1.888251000  | 1.714559000  |
| 7 | 4.111180000   | 2.250839000  | 2.496046000  |
| 6 | 7.032569000   | 2.386042000  | 0.801113000  |
| 7 | 7.917919000   | 3.143342000  | 0.823700000  |
| 6 | -7.506497000  | 0.158391000  | -0.512392000 |
| 6 | -8.087180000  | 1.148480000  | -1.395192000 |
| 6 | -8.431730000  | -0.757929000 | 0.120953000  |
| 6 | -9.421081000  | 1.216285000  | -1.631011000 |
| 1 | -7.436712000  | 1.843972000  | -1.911088000 |
| 6 | -9.769859000  | -0.700612000 | -0.090418000 |
| 1 | -8.049950000  | -1.498517000 | 0.813559000  |
| 6 | -10.369142000 | 0.293573000  | -0.992151000 |
| 1 | -9.840781000  | 1.953501000  | -2.307956000 |
| 1 | -10.453396000 | -1.383312000 | 0.404280000  |
| 8 | -11.585256000 | 0.348573000  | -1.197051000 |

**S2IIDS8-CS** E=-2338.976461 Hartree

|   |              |              |              |
|---|--------------|--------------|--------------|
| 6 | -4.478366000 | -0.952360000 | 0.715986000  |
| 6 | -3.597533000 | 0.081061000  | 0.206261000  |
| 6 | -4.195175000 | 1.103521000  | -0.589182000 |
| 6 | -5.540828000 | 1.088260000  | -0.826383000 |
| 6 | -6.426654000 | 0.076721000  | -0.294170000 |
| 6 | -5.826113000 | -0.962313000 | 0.497319000  |
| 6 | -2.370431000 | -1.520809000 | 1.368333000  |
| 6 | -2.284961000 | -0.236818000 | 0.584067000  |
| 1 | -3.582446000 | 1.904919000  | -0.974782000 |
| 1 | -5.955114000 | 1.896752000  | -1.413237000 |
| 1 | -6.422662000 | -1.774148000 | 0.890056000  |
| 6 | -1.059855000 | 0.457816000  | 0.370332000  |
| 6 | 0.263987000  | 0.010429000  | 0.363221000  |
| 6 | -0.999839000 | 1.956628000  | 0.144480000  |
| 6 | 1.124621000  | 1.153183000  | 0.114287000  |
| 6 | 0.891640000  | -1.271971000 | 0.459779000  |
| 6 | 2.479545000  | 1.058154000  | -0.003985000 |
| 6 | 2.244908000  | -1.380572000 | 0.336265000  |
| 1 | 0.290057000  | -2.143840000 | 0.670469000  |
| 6 | 3.101696000  | -0.226646000 | 0.135668000  |
| 1 | 3.073729000  | 1.929258000  | -0.240876000 |
| 1 | 2.702239000  | -2.354668000 | 0.456762000  |



|    |               |              |              |
|----|---------------|--------------|--------------|
| 8  | -1.910647000  | 2.768243000  | 0.124881000  |
| 8  | -1.485047000  | -2.159751000 | 1.914218000  |
| 7  | 0.342517000   | 2.285615000  | -0.006934000 |
| 7  | -3.719981000  | -1.875758000 | 1.408410000  |
| 6  | -4.211644000  | -3.051925000 | 2.096975000  |
| 1  | -4.917566000  | -2.775130000 | 2.886919000  |
| 1  | -4.704098000  | -3.736834000 | 1.398490000  |
| 1  | -3.349596000  | -3.549143000 | 2.542268000  |
| 6  | 0.827258000   | 3.646522000  | -0.144821000 |
| 1  | 1.515750000   | 3.887914000  | 0.670670000  |
| 1  | 1.337453000   | 3.784064000  | -1.103886000 |
| 1  | -0.039435000  | 4.306199000  | -0.101318000 |
| 6  | 4.487026000   | -0.395585000 | 0.021464000  |
| 6  | 5.577270000   | 0.538982000  | 0.094578000  |
| 6  | 6.694577000   | -1.324283000 | -0.962348000 |
| 6  | 6.781065000   | 0.034874000  | -0.626950000 |
| 6  | 7.699380000   | -2.022581000 | -1.613084000 |
| 6  | 7.946265000   | 0.721633000  | -1.000447000 |
| 6  | 8.855889000   | -1.323723000 | -1.963095000 |
| 1  | 7.580318000   | -3.075118000 | -1.847188000 |
| 6  | 8.965969000   | 0.036776000  | -1.663253000 |
| 1  | 8.066506000   | 1.775966000  | -0.797125000 |
| 1  | 9.663846000   | -1.835895000 | -2.475514000 |
| 1  | 9.860112000   | 0.579936000  | -1.951999000 |
| 6  | 5.575306000   | 1.698690000  | 0.872663000  |
| 6  | 4.548218000   | 2.023815000  | 1.807858000  |
| 7  | 3.746602000   | 2.337583000  | 2.593758000  |
| 6  | 6.649690000   | 2.637331000  | 0.904966000  |
| 7  | 7.489501000   | 3.444299000  | 0.956041000  |
| 16 | 5.128678000   | -2.020999000 | -0.479990000 |
| 8  | 4.420638000   | -2.518501000 | -1.669252000 |
| 8  | 5.271670000   | -2.914387000 | 0.681207000  |
| 6  | -7.820659000  | 0.108883000  | -0.546182000 |
| 6  | -8.410077000  | 1.043838000  | -1.481930000 |
| 6  | -8.734168000  | -0.796761000 | 0.119018000  |
| 6  | -9.741827000  | 1.071747000  | -1.736549000 |
| 1  | -7.767475000  | 1.727508000  | -2.022799000 |
| 6  | -10.070306000 | -0.778109000 | -0.110402000 |
| 1  | -8.345576000  | -1.495264000 | 0.850400000  |
| 6  | -10.678359000 | 0.159893000  | -1.065340000 |
| 1  | -10.168313000 | 1.766620000  | -2.452844000 |
| 1  | -10.745922000 | -1.451006000 | 0.407969000  |
| 8  | -11.892390000 | 0.179385000  | -1.286542000 |

S2IIDS9-CS

E=-2324.927673 Hartree

|   |               |              |              |
|---|---------------|--------------|--------------|
| 6 | 3.774345000   | -1.134164000 | -0.409133000 |
| 6 | 2.938506000   | 0.038796000  | -0.257314000 |
| 6 | 3.594921000   | 1.242814000  | 0.141042000  |
| 6 | 4.944358000   | 1.251965000  | 0.357218000  |
| 6 | 5.782397000   | 0.086129000  | 0.189732000  |
| 6 | 5.124245000   | -1.129232000 | -0.209256000 |
| 6 | 1.635149000   | -1.802297000 | -0.817790000 |
| 6 | 1.608095000   | -0.331471000 | -0.489265000 |
| 1 | 3.018079000   | 2.151472000  | 0.236394000  |
| 1 | 5.402664000   | 2.192819000  | 0.631699000  |
| 1 | 5.682311000   | -2.049924000 | -0.313459000 |
| 6 | 0.406232000   | 0.441576000  | -0.495690000 |
| 6 | -0.933754000  | 0.054217000  | -0.322863000 |
| 6 | 0.390779000   | 1.914893000  | -0.754768000 |
| 6 | -1.767397000  | 1.234721000  | -0.454088000 |
| 6 | -1.591232000  | -1.169301000 | 0.001415000  |
| 6 | -3.123635000  | 1.215678000  | -0.308425000 |
| 6 | -2.949537000  | -1.201146000 | 0.154878000  |
| 1 | -1.010240000  | -2.075118000 | 0.094295000  |
| 6 | -3.776209000  | -0.029664000 | 0.001495000  |
| 1 | -3.699522000  | 2.128219000  | -0.418026000 |
| 1 | -3.420191000  | -2.149022000 | 0.396834000  |
| 8 | 1.312607000   | 2.687918000  | -0.984995000 |
| 8 | 0.717068000   | -2.553061000 | -1.120410000 |
| 7 | -0.951025000  | 2.314627000  | -0.725246000 |
| 7 | 2.968082000   | -2.206243000 | -0.751678000 |
| 6 | 3.403825000   | -3.559412000 | -1.020164000 |
| 1 | 4.107509000   | -3.585484000 | -1.859205000 |
| 1 | 3.883962000   | -4.000738000 | -0.139693000 |
| 1 | 2.516390000   | -4.139192000 | -1.275959000 |
| 6 | -1.375649000  | 3.678429000  | -0.950113000 |
| 1 | -2.042077000  | 3.745516000  | -1.817264000 |
| 1 | -1.893104000  | 4.080940000  | -0.071799000 |
| 1 | -0.477040000  | 4.266420000  | -1.140250000 |
| 6 | -5.158152000  | -0.102204000 | 0.152596000  |
| 6 | -7.632649000  | -0.907949000 | 0.572554000  |
| 6 | -7.729153000  | 0.464986000  | 0.304925000  |
| 6 | -8.780585000  | -1.656435000 | 0.846073000  |
| 6 | -8.973437000  | 1.100600000  | 0.308615000  |
| 6 | -10.019695000 | -1.019049000 | 0.848832000  |
| 1 | -8.705787000  | -2.719078000 | 1.053197000  |
| 6 | -10.115643000 | 0.350578000  | 0.581868000  |

|    |               |              |              |
|----|---------------|--------------|--------------|
| 1  | -9.047228000  | 2.163316000  | 0.101449000  |
| 1  | -10.914930000 | -1.594510000 | 1.060509000  |
| 1  | -11.085223000 | 0.837699000  | 0.586439000  |
| 16 | -6.209646000  | 1.299958000  | -0.027734000 |
| 16 | -6.007984000  | -1.597197000 | 0.537487000  |
| 6  | 7.182655000   | 0.136453000  | 0.409917000  |
| 6  | 8.048348000   | -0.971211000 | 0.074165000  |
| 6  | 7.828486000   | 1.294593000  | 0.985059000  |
| 6  | 9.390410000   | -0.936793000 | 0.278775000  |
| 1  | 7.620549000   | -1.853639000 | -0.388090000 |
| 6  | 9.167025000   | 1.345896000  | 1.210035000  |
| 1  | 7.224090000   | 2.145081000  | 1.277820000  |
| 6  | 10.05557000   | 0.229517000  | 0.870549000  |
| 1  | 10.026745000  | -1.772424000 | 0.004105000  |
| 1  | 9.631652000   | 2.218396000  | 1.658805000  |
| 8  | 11.276878000  | 0.267309000  | 1.067827000  |

**S2IIDS10-CS** E=-2171.269408 Hartree

|   |              |              |              |
|---|--------------|--------------|--------------|
| 6 | 2.790318000  | -1.158157000 | -0.343470000 |
| 6 | 1.939142000  | 0.008232000  | -0.202552000 |
| 6 | 2.572893000  | 1.229995000  | 0.169742000  |
| 6 | 3.927062000  | 1.273935000  | 0.357962000  |
| 6 | 4.770828000  | 0.117352000  | 0.194868000  |
| 6 | 4.142723000  | -1.126619000 | -0.163340000 |
| 6 | 0.648927000  | -1.855961000 | -0.716030000 |
| 6 | 0.608091000  | -0.390710000 | -0.419361000 |
| 1 | 1.978633000  | 2.126184000  | 0.271555000  |
| 1 | 4.379726000  | 2.220828000  | 0.636034000  |
| 1 | 4.732647000  | -2.029087000 | -0.282436000 |
| 6 | -0.603020000 | 0.367238000  | -0.423206000 |
| 6 | -1.934748000 | -0.025176000 | -0.237515000 |
| 6 | -0.640092000 | 1.846556000  | -0.710520000 |
| 6 | -2.780705000 | 1.141629000  | -0.378302000 |
| 6 | -2.586597000 | -1.247479000 | 0.108846000  |
| 6 | -4.135288000 | 1.115473000  | -0.214649000 |
| 6 | -3.941163000 | -1.278455000 | 0.288706000  |
| 1 | -2.001383000 | -2.151803000 | 0.193699000  |
| 6 | -4.788717000 | -0.118217000 | 0.132132000  |
| 1 | -4.701671000 | 2.032322000  | -0.307335000 |
| 1 | -4.394924000 | -2.232087000 | 0.523880000  |
| 8 | 0.276031000  | 2.616733000  | -0.967254000 |
| 8 | -0.256236000 | -2.634582000 | -0.989745000 |

|    |               |              |              |
|----|---------------|--------------|--------------|
| 7  | -1.979113000  | 2.232613000  | -0.668687000 |
| 7  | 1.995014000   | -2.240141000 | -0.663036000 |
| 6  | 2.442119000   | -3.592387000 | -0.912423000 |
| 1  | 3.130516000   | -3.629005000 | -1.764130000 |
| 1  | 2.942658000   | -4.011763000 | -0.032167000 |
| 1  | 1.555839000   | -4.185722000 | -1.140149000 |
| 6  | -2.424675000  | 3.587619000  | -0.910300000 |
| 1  | -3.106578000  | 3.629271000  | -1.766525000 |
| 1  | -2.933131000  | 3.997961000  | -0.030734000 |
| 1  | -1.538259000  | 4.184939000  | -1.126150000 |
| 6  | 6.148741000   | 0.202331000  | 0.382248000  |
| 6  | 8.591367000   | 0.995936000  | 0.872032000  |
| 6  | 8.706508000   | -0.307573000 | 0.584806000  |
| 16 | 6.984190000   | 1.691650000  | 0.827880000  |
| 16 | 7.234860000   | -1.175741000 | 0.195666000  |
| 1  | 9.634068000   | -0.866102000 | 0.572571000  |
| 1  | 9.412292000   | 1.654147000  | 1.127945000  |
| 6  | -6.193722000  | -0.190803000 | 0.313575000  |
| 6  | -6.839991000  | -1.371508000 | 0.839976000  |
| 6  | -7.063857000  | 0.915350000  | -0.015102000 |
| 6  | -8.183293000  | -1.444487000 | 1.027984000  |
| 1  | -6.232940000  | -2.222479000 | 1.125834000  |
| 6  | -8.410371000  | 0.859749000  | 0.152813000  |
| 1  | -6.635001000  | 1.814895000  | -0.442102000 |
| 6  | -9.076356000  | -0.329778000 | 0.695218000  |
| 1  | -8.648643000  | -2.334208000 | 1.440765000  |
| 1  | -9.049533000  | 1.695072000  | -0.116197000 |
| 8  | -10.301940000 | -0.387117000 | 0.859016000  |

**S2IIDS1-OS** E=-1483.167414 Hartree

|   |              |              |              |
|---|--------------|--------------|--------------|
| 6 | 2.079117000  | 1.137380000  | 0.274322000  |
| 6 | 1.248279000  | -0.025526000 | 0.157372000  |
| 6 | 1.894087000  | -1.252566000 | -0.114969000 |
| 6 | 3.268736000  | -1.297644000 | -0.242108000 |
| 6 | 4.091365000  | -0.143977000 | -0.093626000 |
| 6 | 3.450614000  | 1.098137000  | 0.169981000  |
| 6 | -0.060061000 | 1.900415000  | 0.468994000  |
| 6 | -0.118092000 | 0.399399000  | 0.268803000  |
| 1 | 1.312142000  | -2.158186000 | -0.192315000 |
| 1 | 3.732407000  | -2.261657000 | -0.410990000 |
| 1 | 4.024471000  | 2.013788000  | 0.234472000  |
| 6 | -1.320181000 | -0.323366000 | 0.259125000  |
| 6 | -2.674410000 | 0.092193000  | 0.071091000  |

|   |              |              |              |
|---|--------------|--------------|--------------|
| 6 | -1.385643000 | -1.816267000 | 0.526453000  |
| 6 | -3.515463000 | -1.072524000 | 0.203837000  |
| 6 | -3.304659000 | 1.315147000  | -0.278094000 |
| 6 | -4.875099000 | -1.042220000 | 0.044359000  |
| 6 | -4.667593000 | 1.363698000  | -0.450031000 |
| 1 | -2.711242000 | 2.210397000  | -0.382976000 |
| 6 | -5.492180000 | 0.202444000  | -0.286975000 |
| 1 | -5.479517000 | -1.934756000 | 0.155900000  |
| 1 | -5.140779000 | 2.303488000  | -0.712342000 |
| 8 | -0.484679000 | -2.601758000 | 0.775461000  |
| 8 | -0.968422000 | 2.698411000  | 0.647331000  |
| 7 | -2.726966000 | -2.173022000 | 0.491880000  |
| 7 | 1.282580000  | 2.254398000  | 0.472284000  |
| 6 | 1.745593000  | 3.614008000  | 0.663494000  |
| 1 | 2.388612000  | 3.685297000  | 1.546859000  |
| 1 | 2.300581000  | 3.964962000  | -0.213045000 |
| 1 | 0.864420000  | 4.239384000  | 0.807296000  |
| 6 | -3.200704000 | -3.523424000 | 0.726163000  |
| 1 | -3.880215000 | -3.552172000 | 1.583791000  |
| 1 | -3.721145000 | -3.911478000 | -0.155480000 |
| 1 | -2.327776000 | -4.141984000 | 0.934277000  |
| 6 | -6.895331000 | 0.286816000  | -0.461222000 |
| 6 | -7.537876000 | 1.507654000  | -0.799685000 |
| 7 | -8.057942000 | 2.514018000  | -1.078747000 |
| 6 | -7.727615000 | -0.854129000 | -0.306864000 |
| 7 | -8.387963000 | -1.807018000 | -0.174867000 |
| 6 | 5.532894000  | -0.230019000 | -0.208283000 |
| 6 | 6.163320000  | -1.329125000 | -0.878934000 |
| 6 | 6.383719000  | 0.783693000  | 0.342494000  |
| 6 | 7.520446000  | -1.412526000 | -1.004295000 |
| 1 | 5.544369000  | -2.092269000 | -1.337384000 |
| 6 | 7.743836000  | 0.713937000  | 0.245083000  |
| 1 | 5.936859000  | 1.605669000  | 0.891262000  |
| 6 | 8.402934000  | -0.392675000 | -0.443998000 |
| 1 | 7.993266000  | -2.233729000 | -1.533286000 |
| 1 | 8.385944000  | 1.470618000  | 0.684371000  |
| 8 | 9.641780000  | -0.461604000 | -0.546438000 |

**S2IIDS3- OS** E=-2051.022975 Hartree

|   |              |              |              |
|---|--------------|--------------|--------------|
| 6 | -3.706350000 | -1.086215000 | 0.311688000  |
| 6 | -2.965882000 | 0.119871000  | 0.126732000  |
| 6 | -3.695587000 | 1.271032000  | -0.224558000 |
| 6 | -5.076302000 | 1.209943000  | -0.343969000 |

|    |              |              |              |
|----|--------------|--------------|--------------|
| 6  | -5.804578000 | 0.012197000  | -0.137899000 |
| 6  | -5.078125000 | -1.160225000 | 0.190134000  |
| 6  | -1.525267000 | -1.688840000 | 0.601448000  |
| 6  | -1.558108000 | -0.199255000 | 0.292573000  |
| 1  | -3.179845000 | 2.204213000  | -0.387376000 |
| 1  | -5.603533000 | 2.107631000  | -0.644247000 |
| 1  | -5.591652000 | -2.093964000 | 0.382931000  |
| 6  | -0.416458000 | 0.589284000  | 0.251138000  |
| 6  | 0.996629000  | 0.249352000  | 0.202200000  |
| 6  | -0.455674000 | 2.106742000  | 0.301514000  |
| 6  | 1.735234000  | 1.472130000  | 0.219859000  |
| 6  | 1.731808000  | -0.942956000 | 0.068888000  |
| 6  | 3.110174000  | 1.529288000  | 0.146264000  |
| 6  | 3.115381000  | -0.901112000 | -0.012666000 |
| 1  | 1.218044000  | -1.891175000 | 0.052526000  |
| 6  | 3.837685000  | 0.315746000  | 0.032896000  |
| 1  | 3.616838000  | 2.486048000  | 0.162630000  |
| 1  | 3.654476000  | -1.838402000 | -0.104993000 |
| 8  | -1.411885000 | 2.863844000  | 0.377884000  |
| 8  | -0.573128000 | -2.414979000 | 0.846781000  |
| 7  | 0.859803000  | 2.545423000  | 0.299367000  |
| 7  | -2.838298000 | -2.127418000 | 0.614252000  |
| 6  | -3.215147000 | -3.498232000 | 0.893216000  |
| 1  | -3.867699000 | -3.550990000 | 1.770903000  |
| 1  | -3.732024000 | -3.942908000 | 0.036061000  |
| 1  | -2.298339000 | -4.053556000 | 1.090835000  |
| 6  | 1.229321000  | 3.944840000  | 0.362021000  |
| 1  | 1.843100000  | 4.145840000  | 1.246316000  |
| 1  | 1.783564000  | 4.243349000  | -0.534348000 |
| 1  | 0.306411000  | 4.521288000  | 0.424731000  |
| 6  | 5.276615000  | 0.334414000  | -0.039262000 |
| 6  | 6.138514000  | 1.445593000  | 0.040047000  |
| 16 | 6.257317000  | -1.101057000 | -0.247795000 |
| 1  | 5.791284000  | 2.463421000  | 0.175870000  |
| 6  | 7.708712000  | -0.080778000 | -0.208903000 |
| 6  | 9.006685000  | -0.605153000 | -0.334073000 |
| 6  | 9.218392000  | -1.998397000 | -0.498638000 |
| 7  | 9.366662000  | -3.147810000 | -0.633266000 |
| 6  | 10.138676000 | 0.251246000  | -0.299186000 |
| 7  | 11.087893000 | 0.927593000  | -0.274692000 |
| 7  | 7.448192000  | 1.226134000  | -0.050771000 |
| 6  | -7.257133000 | -0.019501000 | -0.269177000 |
| 6  | -8.039529000 | 1.163209000  | -0.091784000 |
| 6  | -7.945146000 | -1.233482000 | -0.577216000 |

|   |               |              |              |
|---|---------------|--------------|--------------|
| 6 | -9.403445000  | 1.144746000  | -0.201726000 |
| 1 | -7.541167000  | 2.087846000  | 0.178989000  |
| 6 | -9.306783000  | -1.274818000 | -0.707229000 |
| 1 | -7.368652000  | -2.135393000 | -0.754798000 |
| 6 | -10.123477000 | -0.081613000 | -0.521394000 |
| 1 | -9.999043000  | 2.038262000  | -0.044657000 |
| 1 | -9.827150000  | -2.192140000 | -0.963329000 |
| 8 | -11.367047000 | -0.109395000 | -0.630312000 |

**S2IIDS4-OS** E=-2017.045651 Hartree

|   |              |              |              |
|---|--------------|--------------|--------------|
| 6 | -2.285121000 | -1.091793000 | 0.319979000  |
| 6 | -1.453524000 | 0.073959000  | 0.194314000  |
| 6 | -2.101757000 | 1.298048000  | -0.108640000 |
| 6 | -3.469688000 | 1.336793000  | -0.243371000 |
| 6 | -4.293749000 | 0.172239000  | -0.088689000 |
| 6 | -3.649856000 | -1.075312000 | 0.196688000  |
| 6 | -0.144230000 | -1.838311000 | 0.573025000  |
| 6 | -0.089401000 | -0.339754000 | 0.338346000  |
| 1 | -1.518954000 | 2.200834000  | -0.208501000 |
| 1 | -3.939516000 | 2.288084000  | -0.471461000 |
| 1 | -4.247254000 | -1.969688000 | 0.302337000  |
| 6 | 1.108784000  | 0.386726000  | 0.330154000  |
| 6 | 2.478222000  | -0.032244000 | 0.187119000  |
| 6 | 1.166137000  | 1.885629000  | 0.537595000  |
| 6 | 3.305208000  | 1.132458000  | 0.293005000  |
| 6 | 3.125060000  | -1.252956000 | -0.103918000 |
| 6 | 4.674865000  | 1.102309000  | 0.158876000  |
| 6 | 4.498485000  | -1.290022000 | -0.260066000 |
| 1 | 2.545883000  | -2.161061000 | -0.172595000 |
| 6 | 5.317114000  | -0.133946000 | -0.124671000 |
| 1 | 5.244786000  | 2.021125000  | 0.215804000  |
| 1 | 4.963817000  | -2.251024000 | -0.442277000 |
| 8 | 0.260883000  | 2.683096000  | 0.739858000  |
| 8 | 0.765727000  | -2.627871000 | 0.782638000  |
| 7 | 2.507269000  | 2.245143000  | 0.514049000  |
| 7 | -1.482656000 | -2.197847000 | 0.562779000  |
| 6 | -1.946900000 | -3.553674000 | 0.776508000  |
| 1 | -2.604952000 | -3.605245000 | 1.649848000  |
| 1 | -2.491395000 | -3.921449000 | -0.099423000 |
| 1 | -1.067423000 | -4.174799000 | 0.946427000  |
| 6 | 2.968533000  | 3.604502000  | 0.704088000  |
| 1 | 3.629372000  | 3.673811000  | 1.574637000  |
| 1 | 3.505154000  | 3.963549000  | -0.180824000 |

|    |               |              |              |
|----|---------------|--------------|--------------|
| 1  | 2.087747000   | 4.225253000  | 0.869232000  |
| 6  | -5.693404000  | 0.265626000  | -0.223296000 |
| 6  | -6.654260000  | -0.845621000 | -0.097317000 |
| 16 | -6.534607000  | 1.771798000  | -0.576365000 |
| 6  | -8.151520000  | 0.948348000  | -0.562019000 |
| 7  | -7.967127000  | -0.392536000 | -0.294121000 |
| 8  | -9.198622000  | 1.517148000  | -0.758732000 |
| 8  | -6.416257000  | -2.023456000 | 0.142710000  |
| 6  | -9.093584000  | -1.317989000 | -0.218121000 |
| 1  | -8.992634000  | -2.091237000 | -0.982982000 |
| 1  | -9.113608000  | -1.796401000 | 0.763329000  |
| 1  | -10.004616000 | -0.743839000 | -0.379289000 |
| 6  | 6.758008000   | -0.210242000 | -0.271120000 |
| 6  | 7.379952000   | -1.295704000 | -0.969184000 |
| 6  | 7.615057000   | 0.799652000  | 0.274263000  |
| 6  | 8.735297000   | -1.370007000 | -1.124428000 |
| 1  | 6.754920000   | -2.056214000 | -1.424161000 |
| 6  | 8.973903000   | 0.738957000  | 0.146263000  |
| 1  | 7.175501000   | 1.611881000  | 0.843411000  |
| 6  | 9.624245000   | -0.353650000 | -0.570663000 |
| 1  | 9.200407000   | -2.181968000 | -1.674272000 |
| 1  | 9.620708000   | 1.493956000  | 0.581740000  |
| 8  | 10.862283000  | -0.414155000 | -0.701025000 |

**S2IIDS5-OS** E=-1788.500096 Hartree

|   |              |              |              |
|---|--------------|--------------|--------------|
| 6 | -1.907843000 | 1.175170000  | -0.072047000 |
| 6 | -1.091184000 | 0.000609000  | -0.162411000 |
| 6 | -1.750927000 | -1.243213000 | -0.089457000 |
| 6 | -3.127710000 | -1.301403000 | 0.040641000  |
| 6 | -3.937547000 | -0.127873000 | 0.085118000  |
| 6 | -3.276580000 | 1.135947000  | 0.032433000  |
| 6 | 0.238828000  | 1.945154000  | -0.142450000 |
| 6 | 0.287595000  | 0.428281000  | -0.212415000 |
| 1 | -1.181695000 | -2.156770000 | -0.161392000 |
| 1 | -3.612349000 | -2.264057000 | 0.095223000  |
| 1 | -3.831478000 | 2.059791000  | 0.134704000  |
| 6 | 1.475148000  | -0.288006000 | -0.340435000 |
| 6 | 2.855973000  | 0.090740000  | -0.140063000 |
| 6 | 1.521998000  | -1.731238000 | -0.814252000 |
| 6 | 3.666891000  | -1.044947000 | -0.452108000 |
| 6 | 3.517415000  | 1.239850000  | 0.338243000  |
| 6 | 5.039865000  | -1.049268000 | -0.333504000 |
| 6 | 4.897308000  | 1.248305000  | 0.454295000  |



|   |              |              |              |
|---|--------------|--------------|--------------|
| 1 | 2.946736000  | 2.117697000  | 0.598577000  |
| 6 | 5.697472000  | 0.123201000  | 0.121987000  |
| 1 | 5.606827000  | -1.924563000 | -0.624627000 |
| 1 | 5.370677000  | 2.137527000  | 0.852669000  |
| 8 | 0.609778000  | -2.472471000 | -1.146579000 |
| 8 | 1.150537000  | 2.757614000  | -0.180069000 |
| 7 | 2.859434000  | -2.093522000 | -0.869077000 |
| 7 | -1.099154000 | 2.302868000  | -0.077973000 |
| 6 | -1.552604000 | 3.678075000  | -0.027699000 |
| 1 | -2.199782000 | 3.905089000  | -0.881280000 |
| 1 | -2.101247000 | 3.874738000  | 0.899599000  |
| 1 | -0.667867000 | 4.313499000  | -0.065935000 |
| 6 | 3.310803000  | -3.401320000 | -1.299059000 |
| 1 | 3.960936000  | -3.319695000 | -2.176369000 |
| 1 | 3.855179000  | -3.909893000 | -0.496188000 |
| 1 | 2.424985000  | -3.980939000 | -1.558899000 |
| 6 | -5.379357000 | -0.184162000 | 0.152488000  |
| 6 | -6.091405000 | -1.395863000 | 0.644986000  |
| 6 | -6.162997000 | 0.917067000  | -0.246905000 |
| 6 | -7.540652000 | 0.907285000  | -0.206440000 |
| 1 | -5.678066000 | 1.799839000  | -0.645894000 |
| 6 | -8.288303000 | -0.268657000 | 0.272618000  |
| 6 | -8.291229000 | 2.031961000  | -0.647147000 |
| 7 | -8.864549000 | 2.977120000  | -1.014479000 |
| 8 | -5.528709000 | -2.407852000 | 1.051546000  |
| 8 | -9.509695000 | -0.299221000 | 0.323738000  |
| 7 | -7.493120000 | -1.355012000 | 0.661629000  |
| 6 | -8.166671000 | -2.561454000 | 1.159778000  |
| 1 | -7.888761000 | -3.419225000 | 0.544607000  |
| 1 | -7.855695000 | -2.761459000 | 2.186975000  |
| 1 | -9.237778000 | -2.383853000 | 1.110551000  |
| 6 | 7.145737000  | 0.164898000  | 0.254483000  |
| 6 | 7.854303000  | 1.408024000  | 0.243002000  |
| 6 | 7.911859000  | -1.034901000 | 0.398291000  |
| 6 | 9.216026000  | 1.459863000  | 0.354679000  |
| 1 | 7.299673000  | 2.328584000  | 0.097426000  |
| 6 | 9.272655000  | -1.008293000 | 0.527947000  |
| 1 | 7.395019000  | -1.987317000 | 0.450119000  |
| 6 | 10.013764000 | 0.248349000  | 0.508831000  |
| 1 | 9.754038000  | 2.401793000  | 0.322085000  |
| 1 | 9.850279000  | -1.917483000 | 0.660423000  |
| 8 | 11.255628000 | 0.283611000  | 0.618407000  |

S2IIDS6-OS E=-2149.817086 Hartree

|   |              |              |              |
|---|--------------|--------------|--------------|
| 6 | -3.957331000 | -1.099885000 | 0.418203000  |
| 6 | -3.162246000 | 0.073627000  | 0.193276000  |
| 6 | -3.843088000 | 1.244897000  | -0.211496000 |
| 6 | -5.215262000 | 1.230271000  | -0.359964000 |
| 6 | -6.003881000 | 0.069718000  | -0.104832000 |
| 6 | -5.327115000 | -1.117249000 | 0.292968000  |
| 6 | -1.796471000 | -1.760713000 | 0.722136000  |
| 6 | -1.787306000 | -0.289340000 | 0.364814000  |
| 1 | -3.288526000 | 2.156945000  | -0.372291000 |
| 1 | -5.706772000 | 2.155971000  | -0.632365000 |
| 1 | -5.871830000 | -2.040493000 | 0.443656000  |
| 6 | -0.608441000 | 0.470199000  | 0.288553000  |
| 6 | 0.754119000  | 0.085022000  | 0.138992000  |
| 6 | -0.592587000 | 1.985869000  | 0.410208000  |
| 6 | 1.559762000  | 1.280014000  | 0.155688000  |
| 6 | 1.438526000  | -1.137189000 | -0.088894000 |
| 6 | 2.917559000  | 1.291342000  | -0.001488000 |
| 6 | 2.798512000  | -1.147547000 | -0.275018000 |
| 1 | 0.889770000  | -2.066543000 | -0.085903000 |
| 6 | 3.608348000  | 0.053491000  | -0.238000000 |
| 1 | 3.476898000  | 2.212587000  | 0.019950000  |
| 1 | 3.289477000  | -2.091612000 | -0.446942000 |
| 8 | -1.523262000 | 2.757320000  | 0.586393000  |
| 8 | -0.865187000 | -2.500838000 | 1.000275000  |
| 7 | 0.733301000  | 2.380266000  | 0.334560000  |
| 7 | -3.127653000 | -2.161481000 | 0.740482000  |
| 6 | -3.547147000 | -3.508617000 | 1.068712000  |
| 1 | -4.199950000 | -3.510199000 | 1.947909000  |
| 1 | -4.077318000 | -3.969039000 | 0.228163000  |
| 1 | -2.647138000 | -4.083833000 | 1.286670000  |
| 6 | 1.165513000  | 3.760302000  | 0.437119000  |
| 1 | 1.845495000  | 3.890258000  | 1.284775000  |
| 1 | 1.676512000  | 4.075327000  | -0.478313000 |
| 1 | 0.274728000  | 4.370276000  | 0.586834000  |
| 6 | 5.024972000  | -0.008231000 | -0.375788000 |
| 6 | 5.881402000  | 1.149308000  | -0.068304000 |
| 6 | 5.686855000  | -1.237042000 | -0.847557000 |
| 6 | 7.868399000  | -0.339608000 | -0.089526000 |
| 8 | 5.110123000  | -2.149955000 | -1.430247000 |
| 7 | 7.075693000  | -1.346329000 | -0.604940000 |
| 6 | 7.708926000  | -2.627390000 | -0.960114000 |
| 1 | 6.932128000  | -3.268276000 | -1.365997000 |
| 1 | 8.494232000  | -2.460162000 | -1.698788000 |

|    |               |              |              |
|----|---------------|--------------|--------------|
| 1  | 8.160161000   | -3.072258000 | -0.072462000 |
| 8  | 5.480082000   | 2.302633000  | 0.067382000  |
| 7  | 7.259212000   | 0.884629000  | 0.115594000  |
| 6  | 8.093476000   | 2.013560000  | 0.561165000  |
| 1  | 8.886042000   | 2.196113000  | -0.165883000 |
| 1  | 7.444978000   | 2.879842000  | 0.647244000  |
| 1  | 8.554680000   | 1.773949000  | 1.520018000  |
| 16 | 9.494174000   | -0.577586000 | 0.230891000  |
| 6  | -7.443576000  | 0.095567000  | -0.246071000 |
| 6  | -8.270901000  | -0.892838000 | 0.382997000  |
| 6  | -8.100174000  | 1.107225000  | -1.022483000 |
| 6  | -9.630308000  | -0.878826000 | 0.261431000  |
| 1  | -7.806981000  | -1.646215000 | 1.010321000  |
| 6  | -9.456609000  | 1.132112000  | -1.173186000 |
| 1  | -7.499991000  | 1.846866000  | -1.540377000 |
| 6  | -10.314877000 | 0.137545000  | -0.534384000 |
| 1  | -10.254069000 | -1.614328000 | 0.759272000  |
| 1  | -9.947205000  | 1.885400000  | -1.781191000 |
| 8  | -11.553037000 | 0.154295000  | -0.659226000 |

**S2IIDS7-OS** E=-1903.758983 Hartree

|   |              |              |              |
|---|--------------|--------------|--------------|
| 6 | -4.178388000 | -1.034027000 | 0.570563000  |
| 6 | -3.313981000 | 0.017493000  | 0.123696000  |
| 6 | -3.918176000 | 1.109627000  | -0.536161000 |
| 6 | -5.288823000 | 1.139287000  | -0.713970000 |
| 6 | -6.144984000 | 0.105976000  | -0.239866000 |
| 6 | -5.546263000 | -1.003222000 | 0.416859000  |
| 6 | -2.066577000 | -1.742689000 | 1.059775000  |
| 6 | -1.959570000 | -0.378741000 | 0.404755000  |
| 1 | -3.309702000 | 1.934925000  | -0.872769000 |
| 1 | -5.721746000 | 2.011528000  | -1.188189000 |
| 1 | -6.147088000 | -1.841685000 | 0.745625000  |
| 6 | -0.740965000 | 0.279304000  | 0.208168000  |
| 6 | 0.610804000  | -0.198060000 | 0.213107000  |
| 6 | -0.640450000 | 1.778914000  | -0.022769000 |
| 6 | 1.473173000  | 0.929895000  | -0.021613000 |
| 6 | 1.222381000  | -1.473071000 | 0.292763000  |
| 6 | 2.834999000  | 0.827941000  | -0.126691000 |
| 6 | 2.590446000  | -1.593618000 | 0.185805000  |
| 1 | 0.615087000  | -2.347710000 | 0.467281000  |
| 6 | 3.447892000  | -0.452749000 | 0.018029000  |
| 1 | 3.431728000  | 1.700713000  | -0.351610000 |
| 1 | 3.048048000  | -2.570532000 | 0.249096000  |

|   |               |              |              |
|---|---------------|--------------|--------------|
| 8 | -1.526071000  | 2.619488000  | -0.052831000 |
| 8 | -1.188267000  | -2.465289000 | 1.505188000  |
| 7 | 0.706976000   | 2.077568000  | -0.145886000 |
| 7 | -3.419231000  | -2.049558000 | 1.130808000  |
| 6 | -3.926122000  | -3.270981000 | 1.722200000  |
| 1 | -4.590183000  | -3.049222000 | 2.564158000  |
| 1 | -4.472134000  | -3.866494000 | 0.982667000  |
| 1 | -3.066955000  | -3.838495000 | 2.080037000  |
| 6 | 1.220088000   | 3.429132000  | -0.267811000 |
| 1 | 1.903831000   | 3.649185000  | 0.557824000  |
| 1 | 1.745559000   | 3.563098000  | -1.219370000 |
| 1 | 0.366512000   | 4.105832000  | -0.230350000 |
| 6 | 4.856275000   | -0.624677000 | -0.065763000 |
| 6 | 5.496756000   | -1.894054000 | -0.552893000 |
| 6 | 5.915766000   | 0.351700000  | 0.094421000  |
| 6 | 6.897059000   | -1.541528000 | -0.890278000 |
| 6 | 7.143246000   | -0.200462000 | -0.547603000 |
| 6 | 7.862099000   | -2.353289000 | -1.469135000 |
| 6 | 8.398310000   | 0.352925000  | -0.814595000 |
| 6 | 9.116028000   | -1.796641000 | -1.731729000 |
| 1 | 7.628326000   | -3.386303000 | -1.705668000 |
| 6 | 9.370468000   | -0.458328000 | -1.411826000 |
| 1 | 8.633831000   | 1.382565000  | -0.582916000 |
| 1 | 9.895483000   | -2.399178000 | -2.187637000 |
| 1 | 10.345551000  | -0.033259000 | -1.629209000 |
| 8 | 4.989330000   | -2.997068000 | -0.695604000 |
| 6 | 5.893106000   | 1.513686000  | 0.860402000  |
| 6 | 4.826622000   | 1.894743000  | 1.730331000  |
| 7 | 4.003493000   | 2.257858000  | 2.471093000  |
| 6 | 7.004837000   | 2.407289000  | 0.939629000  |
| 7 | 7.881315000   | 3.171737000  | 1.015944000  |
| 6 | -7.582354000  | 0.179051000  | -0.420626000 |
| 6 | -8.164405000  | 1.012446000  | -1.430257000 |
| 6 | -8.473505000  | -0.583159000 | 0.402304000  |
| 6 | -9.515908000  | 1.077366000  | -1.618246000 |
| 1 | -7.512571000  | 1.572719000  | -2.091365000 |
| 6 | -9.829054000  | -0.522171000 | 0.244984000  |
| 1 | -8.062457000  | -1.190397000 | 1.201631000  |
| 6 | -10.439524000 | 0.312539000  | -0.785796000 |
| 1 | -9.952486000  | 1.691367000  | -2.399392000 |
| 1 | -10.502535000 | -1.082153000 | 0.885848000  |
| 8 | -11.673968000 | 0.368271000  | -0.944304000 |

S2IIDS8-OS E=-2338.980408 Hartree

|   |              |              |              |
|---|--------------|--------------|--------------|
| 6 | -4.485155000 | -0.956045000 | 0.626507000  |
| 6 | -3.645322000 | 0.093001000  | 0.134803000  |
| 6 | -4.271576000 | 1.137369000  | -0.576590000 |
| 6 | -5.643327000 | 1.126197000  | -0.760176000 |
| 6 | -6.474309000 | 0.096657000  | -0.241666000 |
| 6 | -5.853564000 | -0.965793000 | 0.466937000  |
| 6 | -2.361818000 | -1.595982000 | 1.158056000  |
| 6 | -2.279068000 | -0.259005000 | 0.440331000  |
| 1 | -3.681626000 | 1.959626000  | -0.950781000 |
| 1 | -6.095262000 | 1.964738000  | -1.275885000 |
| 1 | -6.436163000 | -1.802264000 | 0.831858000  |
| 6 | -1.077304000 | 0.412481000  | 0.219051000  |
| 6 | 0.292969000  | -0.031063000 | 0.272262000  |
| 6 | -1.007394000 | 1.895080000  | -0.110891000 |
| 6 | 1.126095000  | 1.099976000  | -0.025016000 |
| 6 | 0.932258000  | -1.278466000 | 0.449103000  |
| 6 | 2.493977000  | 1.028206000  | -0.112038000 |
| 6 | 2.306433000  | -1.369360000 | 0.361294000  |
| 1 | 0.347321000  | -2.153299000 | 0.685776000  |
| 6 | 3.127819000  | -0.225504000 | 0.110115000  |
| 1 | 3.075298000  | 1.898837000  | -0.383777000 |
| 1 | 2.779015000  | -2.327284000 | 0.543602000  |
| 8 | -1.909695000 | 2.712094000  | -0.210925000 |
| 8 | -1.471320000 | -2.277632000 | 1.641228000  |
| 7 | 0.334606000  | 2.217480000  | -0.233405000 |
| 7 | -3.706394000 | -1.927923000 | 1.236649000  |
| 6 | -4.190404000 | -3.132166000 | 1.880894000  |
| 1 | -4.863383000 | -2.886261000 | 2.708877000  |
| 1 | -4.719695000 | -3.771606000 | 1.166442000  |
| 1 | -3.321559000 | -3.664626000 | 2.267841000  |
| 6 | 0.816233000  | 3.567991000  | -0.452167000 |
| 1 | 1.476270000  | 3.872162000  | 0.366173000  |
| 1 | 1.358240000  | 3.640388000  | -1.401043000 |
| 1 | -0.054542000 | 4.222628000  | -0.484162000 |
| 6 | 4.542046000  | -0.374860000 | 0.018819000  |
| 6 | 5.613228000  | 0.546071000  | 0.182433000  |
| 6 | 6.802186000  | -1.283591000 | -0.865859000 |
| 6 | 6.878120000  | 0.051289000  | -0.442273000 |
| 6 | 7.855198000  | -1.971220000 | -1.447595000 |
| 6 | 8.091917000  | 0.723655000  | -0.646661000 |
| 6 | 9.057065000  | -1.285607000 | -1.632525000 |
| 1 | 7.740227000  | -3.005939000 | -1.752562000 |
| 6 | 9.162443000  | 0.050434000  | -1.239035000 |

|    |               |              |              |
|----|---------------|--------------|--------------|
| 1  | 8.217146000   | 1.758843000  | -0.364851000 |
| 1  | 9.903903000   | -1.789175000 | -2.087316000 |
| 1  | 10.094087000  | 0.584826000  | -1.395149000 |
| 6  | 5.538120000   | 1.715547000  | 0.961544000  |
| 6  | 4.447316000   | 2.026439000  | 1.825055000  |
| 7  | 3.600111000   | 2.337416000  | 2.563272000  |
| 6  | 6.585816000   | 2.675106000  | 1.063797000  |
| 7  | 7.399769000   | 3.503871000  | 1.171193000  |
| 16 | 5.182114000   | -1.963464000 | -0.586718000 |
| 8  | 4.551105000   | -2.312472000 | -1.867816000 |
| 8  | 5.202224000   | -2.965969000 | 0.491520000  |
| 6  | -7.915248000  | 0.126815000  | -0.429542000 |
| 6  | -8.509726000  | 0.879419000  | -1.492344000 |
| 6  | -8.790478000  | -0.598314000 | 0.440576000  |
| 6  | -9.862505000  | 0.903852000  | -1.686001000 |
| 1  | -7.866640000  | 1.408056000  | -2.187349000 |
| 6  | -10.147320000 | -0.576451000 | 0.277596000  |
| 1  | -8.367732000  | -1.142910000 | 1.278136000  |
| 6  | -10.771142000 | 0.176128000  | -0.806175000 |
| 1  | -10.309901000 | 1.455996000  | -2.506198000 |
| 1  | -10.810900000 | -1.107441000 | 0.952521000  |
| 8  | -12.006821000 | 0.195795000  | -0.969551000 |

**S2IIDS9-OS** E=-2324.929206 Hartree

|   |              |              |              |
|---|--------------|--------------|--------------|
| 6 | -3.781570000 | -1.126551000 | 0.343404000  |
| 6 | -2.964159000 | 0.048783000  | 0.224568000  |
| 6 | -3.626311000 | 1.254325000  | -0.113475000 |
| 6 | -4.991482000 | 1.265312000  | -0.304823000 |
| 6 | -5.803504000 | 0.098169000  | -0.162693000 |
| 6 | -5.144367000 | -1.121309000 | 0.172075000  |
| 6 | -1.634651000 | -1.824359000 | 0.667527000  |
| 6 | -1.603668000 | -0.338952000 | 0.412676000  |
| 1 | -3.058971000 | 2.170117000  | -0.187271000 |
| 1 | -5.464770000 | 2.214576000  | -0.523406000 |
| 1 | -5.699372000 | -2.048329000 | 0.239603000  |
| 6 | -0.410486000 | 0.419364000  | 0.424715000  |
| 6 | 0.949036000  | 0.029446000  | 0.280549000  |
| 6 | -0.389411000 | 1.905409000  | 0.659781000  |
| 6 | 1.769898000  | 1.210344000  | 0.405219000  |
| 6 | 1.617440000  | -1.188360000 | -0.016497000 |
| 6 | 3.131906000  | 1.201061000  | 0.279818000  |
| 6 | 2.983192000  | -1.214730000 | -0.151100000 |
| 1 | 1.044621000  | -2.098981000 | -0.107981000 |

|    |               |              |              |
|----|---------------|--------------|--------------|
| 6  | 3.796199000   | -0.039919000 | -0.001705000 |
| 1  | 3.697424000   | 2.120555000  | 0.383965000  |
| 1  | 3.461084000   | -2.163657000 | -0.373447000 |
| 8  | -1.308963000  | 2.685702000  | 0.869585000  |
| 8  | -0.718323000  | -2.598633000 | 0.917538000  |
| 7  | 0.949689000   | 2.297894000  | 0.645995000  |
| 7  | -2.969349000  | -2.215874000 | 0.617713000  |
| 6  | -3.406315000  | -3.577547000 | 0.835905000  |
| 1  | -4.090607000  | -3.637320000 | 1.689239000  |
| 1  | -3.910060000  | -3.976560000 | -0.051619000 |
| 1  | -2.516716000  | -4.172524000 | 1.044481000  |
| 6  | 1.376667000   | 3.663414000  | 0.857479000  |
| 1  | 2.032280000   | 3.738706000  | 1.732051000  |
| 1  | 1.907671000   | 4.050654000  | -0.019506000 |
| 1  | 0.478787000   | 4.258276000  | 1.027713000  |
| 6  | 5.188737000   | -0.102939000 | -0.130520000 |
| 6  | 7.672512000   | -0.895374000 | -0.501367000 |
| 6  | 7.754927000   | 0.481857000  | -0.250128000 |
| 6  | 8.830325000   | -1.638290000 | -0.747418000 |
| 6  | 8.994713000   | 1.126306000  | -0.243131000 |
| 6  | 10.064773000  | -0.991981000 | -0.739526000 |
| 1  | 8.766444000   | -2.704066000 | -0.941829000 |
| 6  | 10.146591000  | 0.381638000  | -0.489014000 |
| 1  | 9.057510000   | 2.192159000  | -0.048727000 |
| 1  | 10.967308000  | -1.563497000 | -0.929949000 |
| 1  | 11.112519000  | 0.876023000  | -0.485063000 |
| 16 | 6.224709000   | 1.310462000  | 0.048813000  |
| 16 | 6.052751000   | -1.597251000 | -0.482457000 |
| 6  | -7.232397000  | 0.147420000  | -0.350864000 |
| 6  | -8.089111000  | -0.898230000 | 0.131301000  |
| 6  | -7.864618000  | 1.241551000  | -1.031601000 |
| 6  | -9.442741000  | -0.863130000 | -0.037770000 |
| 1  | -7.653018000  | -1.721948000 | 0.686397000  |
| 6  | -9.214363000  | 1.290666000  | -1.226733000 |
| 1  | -7.247718000  | 2.033652000  | -1.441429000 |
| 6  | -10.100394000 | 0.237700000  | -0.737577000 |
| 1  | -10.083546000 | -1.648065000 | 0.351742000  |
| 1  | -9.679421000  | 2.111678000  | -1.763433000 |
| 8  | -11.333638000 | 0.274991000  | -0.905077000 |

**S2IIDS10-OS** E=-2171.271013 Hartree

|   |              |              |             |
|---|--------------|--------------|-------------|
| 6 | -2.793065000 | -1.141366000 | 0.308735000 |
| 6 | -1.956755000 | 0.027151000  | 0.175979000 |

|    |              |              |              |
|----|--------------|--------------|--------------|
| 6  | -2.605027000 | 1.244891000  | -0.160680000 |
| 6  | -3.967933000 | 1.283211000  | -0.324215000 |
| 6  | -4.796051000 | 0.121360000  | -0.166742000 |
| 6  | -4.152590000 | -1.119865000 | 0.154805000  |
| 6  | -0.647652000 | -1.854885000 | 0.623151000  |
| 6  | -0.604127000 | -0.374735000 | 0.357070000  |
| 1  | -2.020314000 | 2.147122000  | -0.259701000 |
| 1  | -4.430419000 | 2.232459000  | -0.576402000 |
| 1  | -4.730512000 | -2.030785000 | 0.267022000  |
| 6  | 0.597402000  | 0.369384000  | 0.354125000  |
| 6  | 1.958016000  | -0.037806000 | 0.206901000  |
| 6  | 0.639936000  | 1.860264000  | 0.573157000  |
| 6  | 2.785548000  | 1.131006000  | 0.316051000  |
| 6  | 2.614128000  | -1.257977000 | -0.086489000 |
| 6  | 4.151881000  | 1.107183000  | 0.176327000  |
| 6  | 3.983364000  | -1.288209000 | -0.245992000 |
| 1  | 2.038515000  | -2.169245000 | -0.151339000 |
| 6  | 4.804696000  | -0.126880000 | -0.113519000 |
| 1  | 4.715605000  | 2.029616000  | 0.234075000  |
| 1  | 4.450903000  | -2.247539000 | -0.430502000 |
| 8  | -0.272682000 | 2.650915000  | 0.782819000  |
| 8  | 0.257566000  | -2.641439000 | 0.868943000  |
| 7  | 1.979723000  | 2.235621000  | 0.544997000  |
| 7  | -1.990950000 | -2.232523000 | 0.589720000  |
| 6  | -2.437866000 | -3.588346000 | 0.821126000  |
| 1  | -3.112178000 | -3.637780000 | 1.683265000  |
| 1  | -2.955031000 | -3.988548000 | -0.058334000 |
| 1  | -1.550540000 | -4.189245000 | 1.022643000  |
| 6  | 2.427328000  | 3.597345000  | 0.739843000  |
| 1  | 3.093112000  | 3.670499000  | 1.606672000  |
| 1  | 2.955335000  | 3.968952000  | -0.145488000 |
| 1  | 1.540216000  | 4.206988000  | 0.913776000  |
| 6  | -6.186102000 | 0.196635000  | -0.325779000 |
| 6  | -8.641133000 | 0.977623000  | -0.753108000 |
| 6  | -8.740003000 | -0.331800000 | -0.486425000 |
| 16 | -7.039464000 | 1.687292000  | -0.728663000 |
| 16 | -7.254417000 | -1.195042000 | -0.141047000 |
| 1  | -9.663113000 | -0.897437000 | -0.465986000 |
| 1  | -9.473096000 | 1.632204000  | -0.981232000 |
| 6  | 6.237262000  | -0.195762000 | -0.267311000 |
| 6  | 6.872360000  | -1.311358000 | -0.909009000 |
| 6  | 7.094243000  | 0.850930000  | 0.211555000  |
| 6  | 8.225708000  | -1.379340000 | -1.071697000 |
| 1  | 6.255990000  | -2.105576000 | -1.315567000 |



|   |              |              |              |
|---|--------------|--------------|--------------|
| 6 | 8.451038000  | 0.797532000  | 0.074669000  |
| 1 | 6.654727000  | 1.691354000  | 0.738223000  |
| 6 | 9.112033000  | -0.325460000 | -0.585395000 |
| 1 | 8.693622000  | -2.217016000 | -1.579378000 |
| 1 | 9.091523000  | 1.583968000  | 0.461665000  |
| 8 | 10.348431000 | -0.379731000 | -0.723493000 |

**S2IIDS1-T1** E=-1483.162554 Hartree

|   |              |              |              |
|---|--------------|--------------|--------------|
| 6 | -2.083138000 | 1.119834000  | -0.197741000 |
| 6 | -1.272399000 | -0.045836000 | -0.112767000 |
| 6 | -1.925771000 | -1.270664000 | 0.092975000  |
| 6 | -3.314321000 | -1.311793000 | 0.185866000  |
| 6 | -4.107756000 | -0.152025000 | 0.072692000  |
| 6 | -3.463690000 | 1.089861000  | -0.120945000 |
| 6 | 0.057668000  | 1.902528000  | -0.315519000 |
| 6 | 0.123999000  | 0.385784000  | -0.182222000 |
| 1 | -1.352655000 | -2.182350000 | 0.153599000  |
| 1 | -3.795082000 | -2.276044000 | 0.305763000  |
| 1 | -4.036619000 | 2.008581000  | -0.162218000 |
| 6 | 1.311966000  | -0.321365000 | -0.183396000 |
| 6 | 2.699696000  | 0.105647000  | -0.045517000 |
| 6 | 1.382039000  | -1.825219000 | -0.396931000 |
| 6 | 3.522307000  | -1.061147000 | -0.169892000 |
| 6 | 3.342636000  | 1.324554000  | 0.244437000  |
| 6 | 4.892101000  | -1.038114000 | -0.057026000 |
| 6 | 4.721094000  | 1.369744000  | 0.369763000  |
| 1 | 2.761180000  | 2.226916000  | 0.347157000  |
| 6 | 5.524586000  | 0.205812000  | 0.214498000  |
| 1 | 5.483207000  | -1.940187000 | -0.163047000 |
| 1 | 5.204001000  | 2.316145000  | 0.587171000  |
| 8 | 0.483613000  | -2.630440000 | -0.586557000 |
| 8 | 0.962819000  | 2.714534000  | -0.437898000 |
| 7 | 2.723841000  | -2.171390000 | -0.396956000 |
| 7 | -1.281229000 | 2.247511000  | -0.333714000 |
| 6 | -1.747677000 | 3.612390000  | -0.472499000 |
| 1 | -2.374787000 | 3.719079000  | -1.363692000 |
| 1 | -2.322091000 | 3.919779000  | 0.407848000  |
| 1 | -0.868158000 | 4.248487000  | -0.571006000 |
| 6 | 3.195732000  | -3.527517000 | -0.598502000 |
| 1 | 3.846859000  | -3.583919000 | -1.476653000 |
| 1 | 3.747761000  | -3.880958000 | 0.278587000  |
| 1 | 2.319666000  | -4.156570000 | -0.754744000 |
| 6 | 6.947974000  | 0.284890000  | 0.338415000  |

|   |              |              |              |
|---|--------------|--------------|--------------|
| 6 | 7.607265000  | 1.508390000  | 0.616823000  |
| 7 | 8.141066000  | 2.520854000  | 0.847069000  |
| 6 | 7.763308000  | -0.865013000 | 0.189301000  |
| 7 | 8.410010000  | -1.828901000 | 0.062073000  |
| 6 | -5.575200000 | -0.227658000 | 0.154190000  |
| 6 | -6.211360000 | -1.221613000 | 0.950157000  |
| 6 | -6.393918000 | 0.692355000  | -0.559318000 |
| 6 | -7.578608000 | -1.297304000 | 1.040577000  |
| 1 | -5.596875000 | -1.908306000 | 1.523411000  |
| 6 | -7.763398000 | 0.631656000  | -0.493303000 |
| 1 | -5.920517000 | 1.432330000  | -1.197091000 |
| 6 | -8.435347000 | -0.370613000 | 0.318265000  |
| 1 | -8.068326000 | -2.041945000 | 1.659781000  |
| 1 | -8.392416000 | 1.319304000  | -1.049406000 |
| 8 | -9.685145000 | -0.431875000 | 0.390822000  |

**S2IIDS3-T1** E=-2051.020992 Hartree

|   |              |              |              |
|---|--------------|--------------|--------------|
| 6 | -3.714283000 | -1.071018000 | 0.322094000  |
| 6 | -2.978279000 | 0.127752000  | 0.108728000  |
| 6 | -3.707512000 | 1.270554000  | -0.255039000 |
| 6 | -5.093530000 | 1.207907000  | -0.363418000 |
| 6 | -5.813880000 | 0.017513000  | -0.129379000 |
| 6 | -5.089821000 | -1.147210000 | 0.214442000  |
| 6 | -1.532918000 | -1.680950000 | 0.606402000  |
| 6 | -1.558816000 | -0.193465000 | 0.272630000  |
| 1 | -3.193184000 | 2.200212000  | -0.439181000 |
| 1 | -5.625840000 | 2.100077000  | -0.672703000 |
| 1 | -5.604959000 | -2.076327000 | 0.426495000  |
| 6 | -0.420051000 | 0.583278000  | 0.210144000  |
| 6 | 1.005029000  | 0.237138000  | 0.198260000  |
| 6 | -0.451572000 | 2.103017000  | 0.183033000  |
| 6 | 1.739363000  | 1.457292000  | 0.171270000  |
| 6 | 1.739722000  | -0.955947000 | 0.131473000  |
| 6 | 3.118060000  | 1.513254000  | 0.114804000  |
| 6 | 3.128990000  | -0.916972000 | 0.070171000  |
| 1 | 1.227406000  | -1.904535000 | 0.151075000  |
| 6 | 3.844074000  | 0.298734000  | 0.070947000  |
| 1 | 3.625667000  | 2.469138000  | 0.074719000  |
| 1 | 3.670720000  | -1.856995000 | 0.044574000  |
| 8 | -1.403668000 | 2.868803000  | 0.202852000  |
| 8 | -0.583616000 | -2.409321000 | 0.855978000  |
| 7 | 0.864803000  | 2.535363000  | 0.181949000  |
| 7 | -2.846195000 | -2.111244000 | 0.635584000  |

|    |               |              |              |
|----|---------------|--------------|--------------|
| 6  | -3.228022000  | -3.475274000 | 0.939753000  |
| 1  | -3.874006000  | -3.509942000 | 1.823200000  |
| 1  | -3.754686000  | -3.930336000 | 0.094082000  |
| 1  | -2.312898000  | -4.032746000 | 1.138820000  |
| 6  | 1.239111000   | 3.934865000  | 0.179075000  |
| 1  | 1.841147000   | 4.177841000  | 1.060927000  |
| 1  | 1.807848000   | 4.185491000  | -0.722896000 |
| 1  | 0.317944000   | 4.517047000  | 0.198828000  |
| 6  | 5.292803000   | 0.321876000  | 0.025417000  |
| 6  | 6.150949000   | 1.404562000  | 0.272241000  |
| 16 | 6.267390000   | -1.076173000 | -0.358296000 |
| 1  | 5.802757000   | 2.391889000  | 0.552988000  |
| 6  | 7.722028000   | -0.082075000 | -0.148252000 |
| 6  | 9.023309000   | -0.598784000 | -0.318990000 |
| 6  | 9.230337000   | -1.958837000 | -0.662073000 |
| 7  | 9.375860000   | -3.081742000 | -0.944526000 |
| 6  | 10.158131000  | 0.236128000  | -0.151488000 |
| 7  | 11.110157000  | 0.896702000  | -0.020983000 |
| 7  | 7.466313000   | 1.188705000  | 0.179640000  |
| 6  | -7.276476000  | -0.017815000 | -0.248500000 |
| 6  | -8.058952000  | 1.146330000  | 0.003547000  |
| 6  | -7.953892000  | -1.215951000 | -0.617630000 |
| 6  | -9.426345000  | 1.125095000  | -0.096098000 |
| 1  | -7.559558000  | 2.056725000  | 0.318590000  |
| 6  | -9.319326000  | -1.260094000 | -0.735388000 |
| 1  | -7.369703000  | -2.101173000 | -0.848332000 |
| 6  | -10.138517000 | -0.085663000 | -0.475811000 |
| 1  | -10.026301000 | 2.004640000  | 0.114201000  |
| 1  | -9.836780000  | -2.165666000 | -1.035414000 |
| 8  | -11.386298000 | -0.116043000 | -0.574212000 |

**S2IIDS4-T1** E=-2017.041250 Hartree

|   |             |              |              |
|---|-------------|--------------|--------------|
| 6 | 2.287300000 | -1.072567000 | -0.250994000 |
| 6 | 1.472249000 | 0.093864000  | -0.135790000 |
| 6 | 2.130468000 | 1.313101000  | 0.115647000  |
| 6 | 3.510821000 | 1.347476000  | 0.214762000  |
| 6 | 4.315185000 | 0.180894000  | 0.071776000  |
| 6 | 3.660461000 | -1.063491000 | -0.162815000 |
| 6 | 0.142444000 | -1.838739000 | -0.429599000 |
| 6 | 0.079656000 | -0.328679000 | -0.240163000 |
| 1 | 1.558112000 | 2.222156000  | 0.210948000  |
| 1 | 3.988239000 | 2.303570000  | 0.403985000  |
| 1 | 4.246805000 | -1.966083000 | -0.260641000 |

|    |              |              |              |
|----|--------------|--------------|--------------|
| 6  | -1.106078000 | 0.381571000  | -0.226556000 |
| 6  | -2.505355000 | -0.047033000 | -0.132364000 |
| 6  | -1.170312000 | 1.894174000  | -0.364051000 |
| 6  | -3.314038000 | 1.120121000  | -0.209798000 |
| 6  | -3.160364000 | -1.267604000 | 0.086612000  |
| 6  | -4.693417000 | 1.096030000  | -0.112466000 |
| 6  | -4.548281000 | -1.303459000 | 0.200747000  |
| 1  | -2.589337000 | -2.180961000 | 0.141085000  |
| 6  | -5.340379000 | -0.142346000 | 0.095682000  |
| 1  | -5.262419000 | 2.017489000  | -0.148434000 |
| 1  | -5.029517000 | -2.266335000 | 0.330317000  |
| 8  | -0.267724000 | 2.708179000  | -0.502214000 |
| 8  | -0.763416000 | -2.643906000 | -0.591303000 |
| 7  | -2.509777000 | 2.243708000  | -0.362570000 |
| 7  | 1.479813000  | -2.188113000 | -0.443484000 |
| 6  | 1.946359000  | -3.547639000 | -0.626793000 |
| 1  | 2.584959000  | -3.621524000 | -1.512901000 |
| 1  | 2.513455000  | -3.885144000 | 0.247013000  |
| 1  | 1.067196000  | -4.178389000 | -0.757350000 |
| 6  | -2.973028000 | 3.608780000  | -0.499572000 |
| 1  | -3.613973000 | 3.715188000  | -1.381199000 |
| 1  | -3.533083000 | 3.922756000  | 0.387973000  |
| 1  | -2.092325000 | 4.240677000  | -0.614170000 |
| 6  | 5.734165000  | 0.264618000  | 0.168379000  |
| 6  | 6.679442000  | -0.853821000 | 0.047858000  |
| 16 | 6.587992000  | 1.770652000  | 0.457935000  |
| 6  | 8.203639000  | 0.937452000  | 0.423915000  |
| 7  | 8.003063000  | -0.406655000 | 0.197924000  |
| 8  | 9.257001000  | 1.507948000  | 0.578301000  |
| 8  | 6.426289000  | -2.036794000 | -0.154113000 |
| 6  | 9.119573000  | -1.343598000 | 0.117372000  |
| 1  | 9.032011000  | -2.096012000 | 0.904333000  |
| 1  | 9.110845000  | -1.847265000 | -0.851543000 |
| 1  | 10.039210000 | -0.773682000 | 0.240434000  |
| 6  | -6.805721000 | -0.212549000 | 0.198891000  |
| 6  | -7.435772000 | -1.210419000 | 0.995696000  |
| 6  | -7.632874000 | 0.716853000  | -0.493298000 |
| 6  | -8.801511000 | -1.280821000 | 1.106596000  |
| 1  | -6.816037000 | -1.904907000 | 1.553689000  |
| 6  | -9.001175000 | 0.661738000  | -0.406358000 |
| 1  | -7.166545000 | 1.460318000  | -1.132211000 |
| 6  | -9.666065000 | -0.344287000 | 0.406487000  |
| 1  | -9.284577000 | -2.028825000 | 1.727093000  |
| 1  | -9.635268000 | 1.357153000  | -0.946964000 |

|                   |                        |               |              |              |
|-------------------|------------------------|---------------|--------------|--------------|
|                   | 8                      | -10.914858000 | -0.400542000 | 0.498037000  |
| <b>S2IIDS5-T1</b> | E=-1788.496991 Hartree |               |              |              |
|                   | 6                      | 1.910812000   | 1.160507000  | -0.016961000 |
|                   | 6                      | 1.106367000   | -0.010720000 | 0.112566000  |
|                   | 6                      | 1.769850000   | -1.246434000 | 0.104228000  |
|                   | 6                      | 3.156245000   | -1.300640000 | -0.001084000 |
|                   | 6                      | 3.948976000   | -0.128545000 | -0.086123000 |
|                   | 6                      | 3.285384000   | 1.128077000  | -0.099960000 |
|                   | 6                      | -0.240487000  | 1.931671000  | -0.018232000 |
|                   | 6                      | -0.293834000  | 0.418962000  | 0.126320000  |
|                   | 1                      | 1.206366000   | -2.160470000 | 0.202242000  |
|                   | 1                      | 3.645768000   | -2.262913000 | -0.003290000 |
|                   | 1                      | 3.839994000   | 2.048920000  | -0.232636000 |
|                   | 6                      | -1.471727000  | -0.284112000 | 0.273672000  |
|                   | 6                      | -2.873652000  | 0.100450000  | 0.099154000  |
|                   | 6                      | -1.520859000  | -1.733805000 | 0.744311000  |
|                   | 6                      | -3.670109000  | -1.031446000 | 0.427934000  |
|                   | 6                      | -3.542746000  | 1.245255000  | -0.360154000 |
|                   | 6                      | -5.049793000  | -1.038819000 | 0.341136000  |
|                   | 6                      | -4.931862000  | 1.251500000  | -0.448521000 |
|                   | 1                      | -2.979794000  | 2.123965000  | -0.632270000 |
|                   | 6                      | -5.711831000  | 0.129245000  | -0.099846000 |
|                   | 1                      | -5.613442000  | -1.914125000 | 0.640907000  |
|                   | 1                      | -5.419906000  | 2.140546000  | -0.831331000 |
|                   | 8                      | -0.608275000  | -2.484202000 | 1.054746000  |
|                   | 8                      | -1.148805000  | 2.748924000  | -0.040027000 |
|                   | 7                      | -2.855803000  | -2.086080000 | 0.825416000  |
|                   | 7                      | 1.097398000   | 2.285119000  | -0.074149000 |
|                   | 6                      | 1.550787000   | 3.656502000  | -0.185629000 |
|                   | 1                      | 2.185760000   | 3.925533000  | 0.665005000  |
|                   | 1                      | 2.113286000   | 3.807482000  | -1.113294000 |
|                   | 1                      | 0.665493000   | 4.292138000  | -0.191801000 |
|                   | 6                      | -3.306599000  | -3.392584000 | 1.259783000  |
|                   | 1                      | -3.939090000  | -3.309427000 | 2.149765000  |
|                   | 1                      | -3.870752000  | -3.894034000 | 0.466120000  |
|                   | 1                      | -2.419960000  | -3.979248000 | 1.499852000  |
|                   | 6                      | 5.402787000   | -0.176247000 | -0.120845000 |
|                   | 6                      | 6.121201000   | -1.367118000 | -0.649288000 |
|                   | 6                      | 6.167899000   | 0.905694000  | 0.338207000  |
|                   | 6                      | 7.551617000   | 0.896532000  | 0.322450000  |
|                   | 1                      | 5.669528000   | 1.770562000  | 0.760590000  |
|                   | 6                      | 8.308294000   | -0.260901000 | -0.188376000 |

|   |               |              |              |
|---|---------------|--------------|--------------|
| 6 | 8.293635000   | 2.001229000  | 0.819314000  |
| 7 | 8.860660000   | 2.931291000  | 1.233265000  |
| 8 | 5.557738000   | -2.356919000 | -1.105321000 |
| 8 | 9.530842000   | -0.288558000 | -0.214711000 |
| 7 | 7.522593000   | -1.330622000 | -0.636161000 |
| 6 | 8.204888000   | -2.517445000 | -1.168707000 |
| 1 | 7.913823000   | -3.398423000 | -0.593755000 |
| 1 | 7.914334000   | -2.675328000 | -2.209115000 |
| 1 | 9.275062000   | -2.344269000 | -1.091217000 |
| 6 | -7.177352000  | 0.165901000  | -0.200684000 |
| 6 | -7.890685000  | 1.386678000  | -0.027724000 |
| 6 | -7.922861000  | -1.016991000 | -0.472247000 |
| 6 | -9.259018000  | 1.433575000  | -0.111244000 |
| 1 | -7.337224000  | 2.288670000  | 0.212466000  |
| 6 | -9.290761000  | -0.994450000 | -0.571592000 |
| 1 | -7.390130000  | -1.947401000 | -0.641840000 |
| 6 | -10.040562000 | 0.239197000  | -0.391753000 |
| 1 | -9.807386000  | 2.357999000  | 0.038739000  |
| 1 | -9.861003000  | -1.889842000 | -0.797249000 |
| 8 | -11.290090000 | 0.270430000  | -0.474328000 |

**S2IIDS6-T1** E=-2149.812043 Hartree

|   |              |              |              |
|---|--------------|--------------|--------------|
| 6 | 3.972909000  | -1.074794000 | -0.370420000 |
| 6 | 3.198184000  | 0.095439000  | -0.138408000 |
| 6 | 3.885985000  | 1.259585000  | 0.236401000  |
| 6 | 5.273669000  | 1.242194000  | 0.348663000  |
| 6 | 6.032091000  | 0.082170000  | 0.090060000  |
| 6 | 5.352522000  | -1.100836000 | -0.275103000 |
| 6 | 1.809602000  | -1.761001000 | -0.620236000 |
| 6 | 1.789918000  | -0.276270000 | -0.279438000 |
| 1 | 3.339680000  | 2.173151000  | 0.411503000  |
| 1 | 5.782630000  | 2.165519000  | 0.601191000  |
| 1 | 5.896979000  | -2.024289000 | -0.432758000 |
| 6 | 0.625266000  | 0.462253000  | -0.190218000 |
| 6 | -0.774778000 | 0.064497000  | -0.112787000 |
| 6 | 0.601602000  | 1.984325000  | -0.194436000 |
| 6 | -1.562845000 | 1.258946000  | -0.075323000 |
| 6 | -1.465926000 | -1.154047000 | 0.008498000  |
| 6 | -2.931086000 | 1.275338000  | 0.032604000  |
| 6 | -2.844010000 | -1.163649000 | 0.145673000  |
| 1 | -0.926543000 | -2.086824000 | -0.031621000 |
| 6 | -3.631361000 | 0.036680000  | 0.155520000  |
| 1 | -3.479546000 | 2.203236000  | 0.043897000  |

|    |              |              |              |
|----|--------------|--------------|--------------|
| 1  | -3.345831000 | -2.114862000 | 0.226362000  |
| 8  | 1.527967000  | 2.777404000  | -0.275927000 |
| 8  | 0.882179000  | -2.516431000 | -0.868558000 |
| 7  | -0.726310000 | 2.366587000  | -0.142907000 |
| 7  | 3.138132000  | -2.146038000 | -0.666592000 |
| 6  | 3.562929000  | -3.493377000 | -0.987330000 |
| 1  | 4.199950000  | -3.498026000 | -1.878014000 |
| 1  | 4.113768000  | -3.938469000 | -0.151831000 |
| 1  | 2.664917000  | -4.079627000 | -1.181996000 |
| 6  | -1.158342000 | 3.750125000  | -0.163508000 |
| 1  | -1.816487000 | 3.934926000  | -1.018224000 |
| 1  | -1.694676000 | 4.002170000  | 0.757197000  |
| 1  | -0.265526000 | 4.369387000  | -0.247163000 |
| 6  | -5.065606000 | -0.025159000 | 0.243785000  |
| 6  | -5.903634000 | 1.096983000  | -0.197210000 |
| 6  | -5.724316000 | -1.215723000 | 0.797950000  |
| 6  | -7.922442000 | -0.321506000 | 0.082873000  |
| 8  | -5.129375000 | -2.110827000 | 1.391756000  |
| 7  | -7.126003000 | -1.305338000 | 0.636148000  |
| 6  | -7.767617000 | -2.537713000 | 1.124197000  |
| 1  | -6.984027000 | -3.166039000 | 1.536666000  |
| 1  | -8.507233000 | -2.292418000 | 1.887629000  |
| 1  | -8.276665000 | -3.038234000 | 0.299616000  |
| 8  | -5.470693000 | 2.201633000  | -0.518406000 |
| 7  | -7.294401000 | 0.854097000  | -0.285715000 |
| 6  | -8.119873000 | 1.949126000  | -0.822971000 |
| 1  | -8.865305000 | 2.245806000  | -0.083794000 |
| 1  | -7.452284000 | 2.774859000  | -1.048890000 |
| 1  | -8.640047000 | 1.611673000  | -1.720151000 |
| 16 | -9.572794000 | -0.531868000 | -0.106806000 |
| 6  | 7.499538000  | 0.097732000  | 0.196675000  |
| 6  | 8.299827000  | -0.748176000 | -0.621960000 |
| 6  | 8.155195000  | 0.957613000  | 1.122543000  |
| 6  | 9.669296000  | -0.742540000 | -0.533547000 |
| 1  | 7.812939000  | -1.382457000 | -1.356165000 |
| 6  | 9.522564000  | 0.974997000  | 1.237019000  |
| 1  | 7.554153000  | 1.584053000  | 1.773778000  |
| 6  | 10.360573000 | 0.122155000  | 0.409385000  |
| 1  | 10.284464000 | -1.372530000 | -1.167975000 |
| 1  | 10.026144000 | 1.615832000  | 1.953617000  |
| 8  | 11.610461000 | 0.131435000  | 0.503108000  |

S2IIDS7-T1 E=-1903.754895 Hartree

|   |              |              |              |
|---|--------------|--------------|--------------|
| 6 | -4.180060000 | -1.037084000 | 0.510101000  |
| 6 | -3.339198000 | 0.019827000  | 0.063685000  |
| 6 | -3.959486000 | 1.120945000  | -0.545922000 |
| 6 | -5.345093000 | 1.155486000  | -0.676729000 |
| 6 | -6.169506000 | 0.112871000  | -0.205763000 |
| 6 | -5.558047000 | -1.008026000 | 0.398976000  |
| 6 | -2.060311000 | -1.778539000 | 0.923617000  |
| 6 | -1.954008000 | -0.391317000 | 0.300710000  |
| 1 | -3.363061000 | 1.951598000  | -0.888911000 |
| 1 | -5.799288000 | 2.036553000  | -1.115668000 |
| 1 | -6.153108000 | -1.851737000 | 0.727581000  |
| 6 | -0.751157000 | 0.253467000  | 0.092105000  |
| 6 | 0.631223000  | -0.219680000 | 0.135189000  |
| 6 | -0.647773000 | 1.741380000  | -0.211860000 |
| 6 | 1.474462000  | 0.902763000  | -0.136165000 |
| 6 | 1.252695000  | -1.471128000 | 0.285389000  |
| 6 | 2.844159000  | 0.817921000  | -0.219235000 |
| 6 | 2.634109000  | -1.577528000 | 0.203194000  |
| 1 | 0.657438000  | -2.346746000 | 0.488985000  |
| 6 | 3.467069000  | -0.441798000 | -0.014063000 |
| 1 | 3.432357000  | 1.690395000  | -0.469494000 |
| 1 | 3.099010000  | -2.545711000 | 0.323257000  |
| 8 | -1.530042000 | 2.581921000  | -0.302216000 |
| 8 | -1.179658000 | -2.524515000 | 1.323915000  |
| 7 | 0.698836000  | 2.038272000  | -0.321570000 |
| 7 | -3.408609000 | -2.071941000 | 1.026027000  |
| 6 | -3.910750000 | -3.305011000 | 1.596897000  |
| 1 | -4.552570000 | -3.099830000 | 2.460050000  |
| 1 | -4.480663000 | -3.875140000 | 0.855383000  |
| 1 | -3.048536000 | -3.889282000 | 1.918108000  |
| 6 | 1.206588000  | 3.384147000  | -0.505508000 |
| 1 | 1.872912000  | 3.652096000  | 0.320487000  |
| 1 | 1.750827000  | 3.470173000  | -1.452170000 |
| 1 | 0.349066000  | 4.056515000  | -0.520837000 |
| 6 | 4.891745000  | -0.599625000 | -0.081803000 |
| 6 | 5.538831000  | -1.850150000 | -0.607285000 |
| 6 | 5.940142000  | 0.360894000  | 0.154232000  |
| 6 | 6.961580000  | -1.508070000 | -0.843597000 |
| 6 | 7.201916000  | -0.186296000 | -0.428915000 |
| 6 | 7.949994000  | -2.309161000 | -1.396472000 |
| 6 | 8.478064000  | 0.357357000  | -0.591633000 |
| 6 | 9.225871000  | -1.762027000 | -1.554898000 |
| 1 | 7.718163000  | -3.327013000 | -1.693141000 |
| 6 | 9.476561000  | -0.443741000 | -1.160266000 |



|   |               |              |              |
|---|---------------|--------------|--------------|
| 1 | 8.713351000   | 1.371864000  | -0.300818000 |
| 1 | 10.024530000  | -2.356699000 | -1.987163000 |
| 1 | 10.469232000  | -0.025243000 | -1.295097000 |
| 8 | 5.012811000   | -2.929001000 | -0.836477000 |
| 6 | 5.872319000   | 1.521687000  | 0.926073000  |
| 6 | 4.755100000   | 1.905458000  | 1.727557000  |
| 7 | 3.893187000   | 2.276883000  | 2.418566000  |
| 6 | 6.977363000   | 2.412607000  | 1.077089000  |
| 7 | 7.848407000   | 3.175633000  | 1.211816000  |
| 6 | -7.631915000  | 0.185075000  | -0.338366000 |
| 6 | -8.233911000  | 0.889686000  | -1.419648000 |
| 6 | -8.483937000  | -0.449816000 | 0.609571000  |
| 6 | -9.597034000  | 0.956172000  | -1.559294000 |
| 1 | -7.595541000  | 1.350792000  | -2.166331000 |
| 6 | -9.850025000  | -0.389395000 | 0.497944000  |
| 1 | -8.038347000  | -0.959375000 | 1.458178000  |
| 6 | -10.486798000 | 0.318005000  | -0.601940000 |
| 1 | -10.059588000 | 1.476584000  | -2.391764000 |
| 1 | -10.503091000 | -0.856135000 | 1.228351000  |
| 8 | -11.733179000 | 0.374131000  | -0.717805000 |

**S2IIDS8-T1** E=-2338.977120 Hartree

|   |              |              |              |
|---|--------------|--------------|--------------|
| 6 | -4.488191000 | -0.958074000 | 0.584625000  |
| 6 | -3.666795000 | 0.087067000  | 0.077443000  |
| 6 | -4.306636000 | 1.134550000  | -0.603147000 |
| 6 | -5.691363000 | 1.130800000  | -0.743156000 |
| 6 | -6.497138000 | 0.102062000  | -0.211798000 |
| 6 | -5.865333000 | -0.965654000 | 0.465172000  |
| 6 | -2.356894000 | -1.626990000 | 1.055336000  |
| 6 | -2.275346000 | -0.277514000 | 0.347570000  |
| 1 | -3.725710000 | 1.954499000  | -0.994777000 |
| 1 | -6.160849000 | 1.972780000  | -1.238831000 |
| 1 | -6.443993000 | -1.800099000 | 0.842773000  |
| 6 | -1.085506000 | 0.378784000  | 0.107937000  |
| 6 | 0.308941000  | -0.060033000 | 0.196267000  |
| 6 | -1.010838000 | 1.843769000  | -0.293914000 |
| 6 | 1.128236000  | 1.061329000  | -0.136119000 |
| 6 | 0.952712000  | -1.284583000 | 0.433781000  |
| 6 | 2.502585000  | 1.002361000  | -0.200993000 |
| 6 | 2.337912000  | -1.365537000 | 0.369949000  |
| 1 | 0.374706000  | -2.157577000 | 0.690704000  |
| 6 | 3.140250000  | -0.230595000 | 0.081320000  |
| 1 | 3.080079000  | 1.869114000  | -0.494931000 |

|    |               |              |              |
|----|---------------|--------------|--------------|
| 1  | 2.818307000   | -2.311941000 | 0.589536000  |
| 8  | -1.908764000  | 2.656436000  | -0.455661000 |
| 8  | -1.463087000  | -2.327053000 | 1.505131000  |
| 7  | 0.331236000   | 2.164216000  | -0.404003000 |
| 7  | -3.698664000  | -1.942253000 | 1.168151000  |
| 6  | -4.178599000  | -3.149221000 | 1.810186000  |
| 1  | -4.830452000  | -2.905674000 | 2.655589000  |
| 1  | -4.730989000  | -3.775114000 | 1.101201000  |
| 1  | -3.306614000  | -3.694412000 | 2.171168000  |
| 6  | 0.809736000   | 3.502278000  | -0.690882000 |
| 1  | 1.449801000   | 3.859460000  | 0.122164000  |
| 1  | 1.372924000   | 3.522506000  | -1.630036000 |
| 1  | -0.063708000  | 4.147857000  | -0.780194000 |
| 6  | 4.571928000   | -0.365650000 | 0.012106000  |
| 6  | 5.625523000   | 0.542879000  | 0.253422000  |
| 6  | 6.867328000   | -1.240453000 | -0.817216000 |
| 6  | 6.927457000   | 0.065928000  | -0.310234000 |
| 6  | 7.950973000   | -1.909964000 | -1.362133000 |
| 6  | 8.161788000   | 0.726816000  | -0.381975000 |
| 6  | 9.171388000   | -1.234201000 | -1.419890000 |
| 1  | 7.846374000   | -2.923644000 | -1.734160000 |
| 6  | 9.264485000   | 0.072461000  | -0.936486000 |
| 1  | 8.282118000   | 1.738842000  | -0.024366000 |
| 1  | 10.042451000  | -1.723368000 | -1.843468000 |
| 1  | 10.212142000  | 0.598838000  | -0.989115000 |
| 6  | 5.495241000   | 1.707699000  | 1.045426000  |
| 6  | 4.362410000   | 1.989997000  | 1.861812000  |
| 7  | 3.483742000   | 2.282222000  | 2.570682000  |
| 6  | 6.515575000   | 2.687078000  | 1.197999000  |
| 7  | 7.305466000   | 3.533660000  | 1.344582000  |
| 16 | 5.226108000   | -1.912213000 | -0.678649000 |
| 8  | 4.652057000   | -2.149784000 | -2.010346000 |
| 8  | 5.178024000   | -2.990208000 | 0.323023000  |
| 6  | -7.958852000  | 0.134576000  | -0.355778000 |
| 6  | -8.569523000  | 0.767604000  | -1.476374000 |
| 6  | -8.803418000  | -0.467966000 | 0.620215000  |
| 6  | -9.932515000  | 0.796388000  | -1.626527000 |
| 1  | -7.936977000  | 1.202063000  | -2.243626000 |
| 6  | -10.169449000 | -0.443078000 | 0.498740000  |
| 1  | -8.352786000  | -0.921842000 | 1.497224000  |
| 6  | -10.814641000 | 0.190919000  | -0.640764000 |
| 1  | -10.400896000 | 1.261149000  | -2.488134000 |
| 1  | -10.816885000 | -0.884227000 | 1.249751000  |
| 8  | -12.060707000 | 0.213900000  | -0.765585000 |

S2IIDS9-T1 E=-2324.922373 Hartree

|   |               |              |              |
|---|---------------|--------------|--------------|
| 6 | 3.794262000   | -1.116910000 | -0.239760000 |
| 6 | 2.999931000   | 0.060889000  | -0.157650000 |
| 6 | 3.669102000   | 1.267055000  | 0.094119000  |
| 6 | 5.055403000   | 1.280387000  | 0.235237000  |
| 6 | 5.833363000   | 0.110032000  | 0.125894000  |
| 6 | 5.172522000   | -1.114323000 | -0.115564000 |
| 6 | 1.636911000   | -1.845197000 | -0.446598000 |
| 6 | 1.597981000   | -0.346734000 | -0.284859000 |
| 1 | 3.111854000   | 2.188932000  | 0.151537000  |
| 1 | 5.548124000   | 2.234055000  | 0.389534000  |
| 1 | 5.728563000   | -2.043744000 | -0.156507000 |
| 6 | 0.418180000   | 0.390439000  | -0.303496000 |
| 6 | -0.969653000  | -0.003332000 | -0.203269000 |
| 6 | 0.387737000   | 1.896025000  | -0.496871000 |
| 6 | -1.772643000  | 1.177574000  | -0.316951000 |
| 6 | -1.652323000  | -1.215026000 | 0.042840000  |
| 6 | -3.142350000  | 1.181187000  | -0.226667000 |
| 6 | -3.029135000  | -1.234880000 | 0.142527000  |
| 1 | -1.090204000  | -2.131969000 | 0.130918000  |
| 6 | -3.823200000  | -0.055160000 | 0.004434000  |
| 1 | -3.693889000  | 2.110028000  | -0.320419000 |
| 1 | -3.517217000  | -2.186719000 | 0.326163000  |
| 8 | 1.304948000   | 2.687590000  | -0.663577000 |
| 8 | 0.724858000   | -2.647736000 | -0.615786000 |
| 7 | -0.946814000  | 2.277035000  | -0.506832000 |
| 7 | 2.974032000   | -2.221341000 | -0.426675000 |
| 6 | 3.412862000   | -3.591181000 | -0.578786000 |
| 1 | 4.068347000   | -3.697281000 | -1.450197000 |
| 1 | 3.950714000   | -3.933260000 | 0.312615000  |
| 1 | 2.521251000   | -4.202366000 | -0.720307000 |
| 6 | -1.378243000  | 3.645562000  | -0.691076000 |
| 1 | -2.014793000  | 3.738382000  | -1.577797000 |
| 1 | -1.932883000  | 4.003421000  | 0.183577000  |
| 1 | -0.482187000  | 4.252064000  | -0.824304000 |
| 6 | -5.230690000  | -0.105061000 | 0.096316000  |
| 6 | -7.727155000  | -0.880250000 | 0.382834000  |
| 6 | -7.789720000  | 0.503696000  | 0.160887000  |
| 6 | -8.898955000  | -1.615839000 | 0.580639000  |
| 6 | -9.023235000  | 1.159842000  | 0.135523000  |
| 6 | -10.126861000 | -0.957539000 | 0.554503000  |
| 1 | -8.850449000  | -2.686366000 | 0.752346000  |

|    |               |              |              |
|----|---------------|--------------|--------------|
| 6  | -10.188776000 | 0.422032000  | 0.333313000  |
| 1  | -9.070516000  | 2.230437000  | -0.036171000 |
| 1  | -11.039534000 | -1.524255000 | 0.707608000  |
| 1  | -11.149423000 | 0.926396000  | 0.314691000  |
| 16 | -6.244872000  | 1.324969000  | -0.078321000 |
| 16 | -6.114815000  | -1.599678000 | 0.392327000  |
| 6  | 7.297601000   | 0.157979000  | 0.257377000  |
| 6  | 8.125994000   | -0.770739000 | -0.433992000 |
| 6  | 7.927916000   | 1.132690000  | 1.081993000  |
| 6  | 9.493281000   | -0.737201000 | -0.319640000 |
| 1  | 7.661320000   | -1.497014000 | -1.093635000 |
| 6  | 9.292471000   | 1.182151000  | 1.218959000  |
| 1  | 7.307428000   | 1.826877000  | 1.639676000  |
| 6  | 10.157575000  | 0.245298000  | 0.521026000  |
| 1  | 10.127226000  | -1.433462000 | -0.859565000 |
| 1  | 9.773695000   | 1.913621000  | 1.860449000  |
| 8  | 11.405960000  | 0.282259000  | 0.636961000  |

**S2IIDS10-T1** E=-2171.264240 Hartree

|   |              |              |              |
|---|--------------|--------------|--------------|
| 6 | 2.796152000  | -1.118917000 | -0.249258000 |
| 6 | 1.979645000  | 0.051724000  | -0.128309000 |
| 6 | 2.646386000  | 1.265563000  | 0.148262000  |
| 6 | 4.021443000  | 1.297243000  | 0.269583000  |
| 6 | 4.828833000  | 0.128155000  | 0.124373000  |
| 6 | 4.164610000  | -1.110440000 | -0.137745000 |
| 6 | 0.646242000  | -1.855382000 | -0.474986000 |
| 6 | 0.597542000  | -0.353837000 | -0.256754000 |
| 1 | 2.073750000  | 2.175369000  | 0.242758000  |
| 1 | 4.497167000  | 2.250747000  | 0.476268000  |
| 1 | 4.726924000  | -2.032172000 | -0.238551000 |
| 6 | -0.589932000 | 0.371236000  | -0.244180000 |
| 6 | -1.989495000 | -0.052393000 | -0.146337000 |
| 6 | -0.641367000 | 1.871506000  | -0.380317000 |
| 6 | -2.794409000 | 1.118784000  | -0.220722000 |
| 6 | -2.650497000 | -1.269231000 | 0.073787000  |
| 6 | -4.174324000 | 1.100541000  | -0.118626000 |
| 6 | -4.038619000 | -1.298588000 | 0.192618000  |
| 1 | -2.085070000 | -2.186528000 | 0.124079000  |
| 6 | -4.826684000 | -0.134228000 | 0.091128000  |
| 1 | -4.738884000 | 2.025105000  | -0.152319000 |
| 1 | -4.523994000 | -2.259639000 | 0.322483000  |
| 8 | 0.265024000  | 2.686137000  | -0.520686000 |
| 8 | -0.259875000 | -2.653382000 | -0.669371000 |

|    |               |              |              |
|----|---------------|--------------|--------------|
| 7  | -1.982442000  | 2.234221000  | -0.375294000 |
| 7  | 1.984829000   | -2.223126000 | -0.470356000 |
| 6  | 2.432662000   | -3.584046000 | -0.670614000 |
| 1  | 3.083730000   | -3.655915000 | -1.548725000 |
| 1  | 2.977184000   | -3.951358000 | 0.206502000  |
| 1  | 1.544820000   | -4.196836000 | -0.827959000 |
| 6  | -2.432482000  | 3.602160000  | -0.510321000 |
| 1  | -3.075148000  | 3.717370000  | -1.390099000 |
| 1  | -2.987802000  | 3.923198000  | 0.378207000  |
| 1  | -1.544875000  | 4.224370000  | -0.626785000 |
| 6  | 6.234873000   | 0.190230000  | 0.238961000  |
| 6  | 8.705862000   | 0.954623000  | 0.566768000  |
| 6  | 8.782661000   | -0.362984000 | 0.333367000  |
| 16 | 7.112448000   | 1.683679000  | 0.574567000  |
| 16 | 7.278931000   | -1.220859000 | 0.058965000  |
| 1  | 9.699841000   | -0.937623000 | 0.299755000  |
| 1  | 9.552886000   | 1.604014000  | 0.750058000  |
| 6  | -6.292086000  | -0.198847000 | 0.198355000  |
| 6  | -6.925691000  | -1.195076000 | 0.994350000  |
| 6  | -7.118890000  | 0.734737000  | -0.488479000 |
| 6  | -8.291629000  | -1.260320000 | 1.108642000  |
| 1  | -6.307217000  | -1.893664000 | 1.548762000  |
| 6  | -8.487367000  | 0.685749000  | -0.396595000 |
| 1  | -6.651244000  | 1.477886000  | -1.126889000 |
| 6  | -9.155053000  | -0.318879000 | 0.414762000  |
| 1  | -8.775522000  | -2.008430000 | 1.728579000  |
| 1  | -9.119640000  | 1.385932000  | -0.933410000 |
| 8  | -10.404649000 | -0.370144000 | 0.510065000  |

**S2TIIDTS1-CS** E=-2586.797553 Hartree

|   |              |              |              |
|---|--------------|--------------|--------------|
| 6 | -1.888669000 | 1.637160000  | -0.591529000 |
| 6 | -1.228062000 | 0.356624000  | -0.493443000 |
| 6 | -2.046230000 | -0.773037000 | -0.218155000 |
| 6 | -3.403134000 | -0.621871000 | -0.080130000 |
| 6 | -4.054404000 | 0.648514000  | -0.202433000 |
| 6 | -3.242174000 | 1.797546000  | -0.461215000 |
| 6 | 0.339818000  | 2.050630000  | -0.838324000 |
| 6 | 0.164559000  | 0.568940000  | -0.634088000 |
| 1 | -1.595866000 | -1.751678000 | -0.145867000 |
| 1 | -4.003724000 | -1.502212000 | 0.124906000  |
| 1 | -3.685683000 | 2.781718000  | -0.546369000 |
| 6 | 1.250148000  | -0.342580000 | -0.650080000 |
| 6 | 2.632986000  | -0.147277000 | -0.441467000 |

|    |               |              |              |
|----|---------------|--------------|--------------|
| 6  | 1.084437000   | -1.806230000 | -0.983910000 |
| 6  | 3.299781000   | -1.417619000 | -0.618713000 |
| 6  | 3.440377000   | 0.956400000  | -0.044302000 |
| 6  | 4.645307000   | -1.591990000 | -0.450111000 |
| 6  | 4.788827000   | 0.792265000  | 0.134060000  |
| 1  | 2.985666000   | 1.926751000  | 0.088494000  |
| 6  | 5.448314000   | -0.468309000 | -0.065676000 |
| 1  | 5.093129000   | -2.566817000 | -0.596588000 |
| 1  | 5.380402000   | 1.651600000  | 0.432655000  |
| 8  | 0.074626000   | -2.433774000 | -1.269232000 |
| 8  | 1.357407000   | 2.701481000  | -1.031701000 |
| 7  | 2.356578000   | -2.372418000 | -0.956091000 |
| 7  | -0.935623000  | 2.614225000  | -0.813758000 |
| 6  | -1.181048000  | 4.029363000  | -0.994320000 |
| 1  | -1.820060000  | 4.207709000  | -1.865826000 |
| 1  | -1.656527000  | 4.462144000  | -0.107224000 |
| 1  | -0.213745000  | 4.506518000  | -1.153757000 |
| 6  | 2.611865000   | -3.768406000 | -1.243118000 |
| 1  | 3.284353000   | -3.874431000 | -2.100977000 |
| 1  | 3.054266000   | -4.272638000 | -0.377034000 |
| 1  | 1.652753000   | -4.230371000 | -1.478380000 |
| 6  | -5.457176000  | 0.770714000  | -0.066408000 |
| 6  | -6.245274000  | 1.946122000  | -0.160290000 |
| 16 | -6.506645000  | -0.608060000 | 0.262088000  |
| 6  | -7.593445000  | 1.748884000  | 0.020156000  |
| 1  | -5.815468000  | 2.919656000  | -0.359397000 |
| 6  | -7.963102000  | 0.397107000  | 0.269564000  |
| 1  | -8.318531000  | 2.551224000  | -0.023258000 |
| 6  | 6.838722000   | -0.602609000 | 0.115979000  |
| 6  | 7.635641000   | -1.768680000 | -0.045929000 |
| 16 | 7.870701000   | 0.752744000  | 0.607841000  |
| 6  | 8.972411000   | -1.592689000 | 0.205326000  |
| 1  | 7.215666000   | -2.720596000 | -0.346143000 |
| 6  | 9.308702000   | -0.258466000 | 0.585090000  |
| 1  | 9.724946000   | -2.368210000 | 0.132088000  |
| 6  | 10.575787000  | 0.224467000  | 0.902104000  |
| 6  | 11.699209000  | -0.647937000 | 0.863750000  |
| 7  | 12.602435000  | -1.384319000 | 0.824600000  |
| 6  | 10.785723000  | 1.581287000  | 1.269188000  |
| 7  | 10.929890000  | 2.699451000  | 1.567642000  |
| 6  | -9.243672000  | -0.125286000 | 0.492119000  |
| 6  | -10.407542000 | 0.731529000  | 0.490619000  |
| 6  | -9.457103000  | -1.532639000 | 0.731357000  |
| 6  | -11.654065000 | 0.240819000  | 0.705128000  |

|   |               |              |             |
|---|---------------|--------------|-------------|
| 1 | -10.277970000 | 1.794064000  | 0.313402000 |
| 6 | -10.695544000 | -2.042311000 | 0.947668000 |
| 1 | -8.597180000  | -2.197291000 | 0.736685000 |
| 6 | -11.892923000 | -1.188370000 | 0.950928000 |
| 1 | -12.526702000 | 0.886008000  | 0.703785000 |
| 1 | -10.852433000 | -3.101041000 | 1.126974000 |
| 8 | -13.024462000 | -1.643710000 | 1.147165000 |

**S2TIIDTS3-CS** E=-3154.650772 Hartree

|   |              |              |              |
|---|--------------|--------------|--------------|
| 6 | -1.509572000 | -1.538772000 | 0.707142000  |
| 6 | -0.878628000 | -0.251629000 | 0.582450000  |
| 6 | -1.721918000 | 0.852357000  | 0.299408000  |
| 6 | -3.080524000 | 0.670212000  | 0.177236000  |
| 6 | -3.699659000 | -0.607230000 | 0.326100000  |
| 6 | -2.863124000 | -1.731316000 | 0.593736000  |
| 6 | 0.726173000  | -1.919622000 | 0.932951000  |
| 6 | 0.529053000  | -0.436620000 | 0.709090000  |
| 1 | -1.294305000 | 1.838988000  | 0.205424000  |
| 1 | -3.699861000 | 1.535875000  | -0.034457000 |
| 1 | -3.283649000 | -2.723650000 | 0.698227000  |
| 6 | 1.595580000  | 0.482951000  | 0.700258000  |
| 6 | 2.999353000  | 0.298498000  | 0.525584000  |
| 6 | 1.406250000  | 1.959526000  | 0.952803000  |
| 6 | 3.635368000  | 1.583566000  | 0.652993000  |
| 6 | 3.831418000  | -0.800853000 | 0.195827000  |
| 6 | 4.984749000  | 1.776758000  | 0.501919000  |
| 6 | 5.185744000  | -0.618116000 | 0.035282000  |
| 1 | 3.399750000  | -1.785156000 | 0.096911000  |
| 6 | 5.812021000  | 0.656173000  | 0.188701000  |
| 1 | 5.409212000  | 2.766868000  | 0.611554000  |
| 1 | 5.797080000  | -1.480060000 | -0.211794000 |
| 8 | 0.385759000  | 2.592328000  | 1.185843000  |
| 8 | 1.754232000  | -2.553176000 | 1.126111000  |
| 7 | 2.671577000  | 2.539344000  | 0.924817000  |
| 7 | -0.537997000 | -2.499639000 | 0.932574000  |
| 6 | -0.762529000 | -3.915293000 | 1.137588000  |
| 1 | -1.389731000 | -4.087598000 | 2.018687000  |
| 1 | -1.242504000 | -4.367176000 | 0.262660000  |
| 1 | 0.212225000  | -4.377931000 | 1.293511000  |
| 6 | 2.901985000  | 3.951319000  | 1.146126000  |
| 1 | 3.554767000  | 4.110005000  | 2.011166000  |
| 1 | 3.355777000  | 4.417994000  | 0.264894000  |
| 1 | 1.931990000  | 4.410465000  | 1.338118000  |

|    |               |              |              |
|----|---------------|--------------|--------------|
| 6  | -5.110111000  | -0.766090000 | 0.206877000  |
| 6  | -5.869412000  | -1.945770000 | 0.331871000  |
| 16 | -6.184937000  | 0.589946000  | -0.139937000 |
| 6  | -7.231646000  | -1.776288000 | 0.159664000  |
| 1  | -5.421372000  | -2.907617000 | 0.547196000  |
| 6  | -7.613588000  | -0.444321000 | -0.111050000 |
| 1  | -7.953315000  | -2.582240000 | 0.224111000  |
| 6  | 7.215512000   | 0.814099000  | 0.029997000  |
| 6  | 7.979542000   | 1.997764000  | 0.153396000  |
| 16 | 8.281074000   | -0.529183000 | -0.370713000 |
| 6  | 9.330583000   | 1.833510000  | -0.061071000 |
| 1  | 7.535933000   | 2.954526000  | 0.398343000  |
| 6  | 9.717976000   | 0.502336000  | -0.368382000 |
| 1  | 10.041070000  | 2.647748000  | -0.000846000 |
| 6  | -8.903723000  | 0.052282000  | -0.332547000 |
| 6  | -9.290154000  | 1.390581000  | -0.603917000 |
| 16 | -10.357514000 | -0.943652000 | -0.314456000 |
| 1  | -8.574242000  | 2.205320000  | -0.668308000 |
| 6  | -11.317328000 | 0.518066000  | -0.668041000 |
| 6  | -12.702169000 | 0.486808000  | -0.809536000 |
| 6  | -13.415649000 | -0.734148000 | -0.674793000 |
| 7  | -13.972266000 | -1.752664000 | -0.558426000 |
| 6  | -13.432974000 | 1.673622000  | -1.091971000 |
| 7  | -14.060868000 | 2.627642000  | -1.323412000 |
| 7  | -10.571968000 | 1.642720000  | -0.782937000 |
| 6  | 11.005053000  | 0.009530000  | -0.637069000 |
| 6  | 11.235964000  | -1.382745000 | -0.933978000 |
| 6  | 12.152685000  | 0.885894000  | -0.625989000 |
| 6  | 12.478578000  | -1.862537000 | -1.194905000 |
| 1  | 10.387482000  | -2.061765000 | -0.947481000 |
| 6  | 13.403274000  | 0.425692000  | -0.884400000 |
| 1  | 12.008723000  | 1.938392000  | -0.405452000 |
| 6  | 13.660580000  | -0.988349000 | -1.189543000 |
| 1  | 12.649165000  | -2.910781000 | -1.417841000 |
| 1  | 14.264673000  | 1.085721000  | -0.875844000 |
| 8  | 14.795685000  | -1.415977000 | -1.426236000 |

**S2TIIDTS4-CS** E=-3120.677991 Hartree

|   |              |              |              |
|---|--------------|--------------|--------------|
| 6 | -1.993020000 | 1.683345000  | -0.707219000 |
| 6 | -1.368678000 | 0.384252000  | -0.610602000 |
| 6 | -2.218453000 | -0.719211000 | -0.319052000 |
| 6 | -3.567130000 | -0.526957000 | -0.162648000 |
| 6 | -4.184200000 | 0.763517000  | -0.282203000 |



|    |              |              |              |
|----|--------------|--------------|--------------|
| 6  | -3.337530000 | 1.886184000  | -0.559577000 |
| 6  | 0.244014000  | 2.028355000  | -0.984656000 |
| 6  | 0.026806000  | 0.552987000  | -0.769296000 |
| 1  | -1.796518000 | -1.710713000 | -0.249206000 |
| 1  | -4.191351000 | -1.387573000 | 0.054530000  |
| 1  | -3.751084000 | 2.883492000  | -0.643082000 |
| 6  | 1.084516000  | -0.391093000 | -0.793046000 |
| 6  | 2.478190000  | -0.234550000 | -0.601013000 |
| 6  | 0.871877000  | -1.847822000 | -1.112181000 |
| 6  | 3.103621000  | -1.524141000 | -0.774683000 |
| 6  | 3.322600000  | 0.845294000  | -0.223397000 |
| 6  | 4.446906000  | -1.737584000 | -0.618926000 |
| 6  | 4.669715000  | 0.640917000  | -0.058961000 |
| 1  | 2.899656000  | 1.830439000  | -0.094385000 |
| 6  | 5.286282000  | -0.637601000 | -0.254167000 |
| 1  | 4.862627000  | -2.727233000 | -0.762205000 |
| 1  | 5.290632000  | 1.484610000  | 0.224688000  |
| 8  | -0.157994000 | -2.451015000 | -1.382591000 |
| 8  | 1.278342000  | 2.647999000  | -1.194551000 |
| 7  | 2.128358000  | -2.452388000 | -1.093550000 |
| 7  | -1.012564000 | 2.630489000  | -0.946964000 |
| 6  | -1.217670000 | 4.050673000  | -1.132517000 |
| 1  | -1.862855000 | 4.243870000  | -1.996448000 |
| 1  | -1.668737000 | 4.502906000  | -0.242192000 |
| 1  | -0.238579000 | 4.497585000  | -1.307319000 |
| 6  | 2.336720000  | -3.857063000 | -1.371156000 |
| 1  | 2.996117000  | -3.992269000 | -2.235379000 |
| 1  | 2.772783000  | -4.368903000 | -0.506000000 |
| 1  | 1.360650000  | -4.290028000 | -1.591958000 |
| 6  | -5.576971000 | 0.925451000  | -0.126296000 |
| 6  | -6.323449000 | 2.133290000  | -0.223130000 |
| 16 | -6.659746000 | -0.429159000 | 0.233632000  |
| 6  | -7.669744000 | 1.984787000  | -0.022794000 |
| 1  | -5.863311000 | 3.089290000  | -0.439197000 |
| 6  | -8.072675000 | 0.638551000  | 0.247172000  |
| 1  | -8.384249000 | 2.798953000  | -0.060920000 |
| 6  | 6.679958000  | -0.815862000 | -0.087511000 |
| 6  | 7.435563000  | -2.003452000 | -0.248081000 |
| 16 | 7.760781000  | 0.499927000  | 0.377414000  |
| 6  | 8.783850000  | -1.863890000 | -0.013579000 |
| 1  | 6.984044000  | -2.945040000 | -0.534532000 |
| 6  | 9.185724000  | -0.548797000 | 0.349982000  |
| 1  | 9.485762000  | -2.683470000 | -0.097653000 |
| 6  | -9.350359000 | 0.190705000  | 0.486833000  |

|    |               |              |             |
|----|---------------|--------------|-------------|
| 6  | -9.676913000  | -1.210842000 | 0.756392000 |
| 16 | -10.796405000 | 1.205630000  | 0.511281000 |
| 6  | -11.843217000 | -0.235215000 | 0.880765000 |
| 7  | -11.054744000 | -1.366539000 | 0.961159000 |
| 6  | -11.655379000 | -2.664919000 | 1.249469000 |
| 1  | -12.383721000 | -2.921808000 | 0.477129000 |
| 1  | -10.847502000 | -3.395676000 | 1.264542000 |
| 1  | -12.160234000 | -2.638536000 | 2.217654000 |
| 8  | -13.040381000 | -0.185536000 | 1.028918000 |
| 8  | -8.875191000  | -2.136324000 | 0.802016000 |
| 6  | 10.474734000  | -0.085385000 | 0.650704000 |
| 6  | 10.722980000  | 1.290188000  | 1.005622000 |
| 6  | 11.612011000  | -0.974577000 | 0.616723000 |
| 6  | 11.969246000  | 1.741894000  | 1.298179000 |
| 1  | 9.883695000   | 1.980215000  | 1.037952000 |
| 6  | 12.865861000  | -0.541898000 | 0.906081000 |
| 1  | 11.457439000  | -2.015710000 | 0.352609000 |
| 6  | 13.140079000  | 0.854184000  | 1.270327000 |
| 1  | 12.150451000  | 2.778256000  | 1.564621000 |
| 1  | 13.718034000  | -1.213523000 | 0.879441000 |
| 8  | 14.278928000  | 1.256784000  | 1.535734000 |

**S2TIIDTS5-CS** E=-2892.141597 Hartree

|   |              |              |              |
|---|--------------|--------------|--------------|
| 6 | 1.602149000  | -1.685542000 | -0.718590000 |
| 6 | 0.979795000  | -0.386176000 | -0.628148000 |
| 6 | 1.831821000  | 0.720029000  | -0.356405000 |
| 6 | 3.182597000  | 0.529334000  | -0.212363000 |
| 6 | 3.796597000  | -0.762300000 | -0.326437000 |
| 6 | 2.949161000  | -1.886637000 | -0.583480000 |
| 6 | -0.634831000 | -2.039934000 | -0.967370000 |
| 6 | -0.418429000 | -0.557030000 | -0.768677000 |
| 1 | 1.410650000  | 1.711991000  | -0.290505000 |
| 1 | 3.809361000  | 1.391223000  | -0.010079000 |
| 1 | 3.363219000  | -2.884059000 | -0.661278000 |
| 6 | -1.476659000 | 0.381570000  | -0.792512000 |
| 6 | -2.872495000 | 0.221954000  | -0.595000000 |
| 6 | -1.269303000 | 1.838688000  | -1.117066000 |
| 6 | -3.499329000 | 1.509231000  | -0.773995000 |
| 6 | -3.711917000 | -0.856301000 | -0.206926000 |
| 6 | -4.843678000 | 1.720544000  | -0.616992000 |
| 6 | -5.059989000 | -0.653796000 | -0.040728000 |
| 1 | -3.287187000 | -1.839398000 | -0.070235000 |
| 6 | -5.678400000 | 0.621125000  | -0.244226000 |

|    |               |              |              |
|----|---------------|--------------|--------------|
| 1  | -5.261591000  | 2.708272000  | -0.766169000 |
| 1  | -5.677524000  | -1.497125000 | 0.251137000  |
| 8  | -0.242323000  | 2.443484000  | -1.391474000 |
| 8  | -1.670871000  | -2.659885000 | -1.160685000 |
| 7  | -2.527874000  | 2.438209000  | -1.100041000 |
| 7  | 0.621446000   | -2.638019000 | -0.937730000 |
| 6  | 0.829447000   | -4.060202000 | -1.112181000 |
| 1  | 1.466205000   | -4.258109000 | -1.980943000 |
| 1  | 1.291327000   | -4.501305000 | -0.222148000 |
| 1  | -0.149359000  | -4.512766000 | -1.272595000 |
| 6  | -2.741504000  | 3.841515000  | -1.383999000 |
| 1  | -3.402271000  | 3.969793000  | -2.248055000 |
| 1  | -3.177813000  | 4.355228000  | -0.520258000 |
| 1  | -1.767413000  | 4.276993000  | -1.608139000 |
| 6  | 5.195384000   | -0.924009000 | -0.183071000 |
| 6  | 5.938839000   | -2.126077000 | -0.276964000 |
| 16 | 6.279183000   | 0.434692000  | 0.154962000  |
| 6  | 7.290532000   | -1.963960000 | -0.089191000 |
| 1  | 5.486548000   | -3.088786000 | -0.480527000 |
| 6  | 7.687519000   | -0.618802000 | 0.164461000  |
| 1  | 7.996463000   | -2.783587000 | -0.129999000 |
| 6  | -7.073850000  | 0.796972000  | -0.076669000 |
| 6  | -7.830920000  | 1.983386000  | -0.243271000 |
| 16 | -8.148868000  | -0.517843000 | 0.395567000  |
| 6  | -9.178319000  | 1.842098000  | -0.006714000 |
| 1  | -7.381245000  | 2.924037000  | -0.535023000 |
| 6  | -9.576095000  | 0.527599000  | 0.364133000  |
| 1  | -9.881990000  | 2.659749000  | -0.094387000 |
| 6  | 8.995186000   | -0.157430000 | 0.393079000  |
| 6  | 10.116341000  | -1.025279000 | 0.396014000  |
| 6  | 9.218631000   | 1.276387000  | 0.639375000  |
| 6  | 11.388381000  | -0.565444000 | 0.619859000  |
| 1  | 9.978311000   | -2.085699000 | 0.217546000  |
| 6  | 11.661446000  | 0.860838000  | 0.870105000  |
| 6  | 12.498971000  | -1.458196000 | 0.618156000  |
| 7  | 13.376710000  | -2.223111000 | 0.607927000  |
| 8  | 8.296637000   | 2.095068000  | 0.654076000  |
| 8  | 12.783553000  | 1.301214000  | 1.072683000  |
| 7  | 10.527907000  | 1.697521000  | 0.860735000  |
| 6  | 10.720606000  | 3.131981000  | 1.102378000  |
| 1  | 10.357426000  | 3.703036000  | 0.245524000  |
| 1  | 10.153247000  | 3.437985000  | 1.983720000  |
| 1  | 11.784077000  | 3.298954000  | 1.252948000  |
| 6  | -10.863029000 | 0.062873000  | 0.668173000  |

|   |               |              |             |
|---|---------------|--------------|-------------|
| 6 | -11.105981000 | -1.312787000 | 1.030269000 |
| 6 | -12.002513000 | 0.950581000  | 0.630234000 |
| 6 | -12.350082000 | -1.766222000 | 1.325866000 |
| 1 | -10.264507000 | -1.999760000 | 1.065214000 |
| 6 | -13.254300000 | 0.516253000  | 0.922553000 |
| 1 | -11.850193000 | 1.990470000  | 0.360832000 |
| 6 | -13.523211000 | -0.879996000 | 1.294046000 |
| 1 | -12.529378000 | -2.801413000 | 1.597688000 |
| 1 | -14.108867000 | 1.184555000  | 0.893558000 |
| 8 | -14.659653000 | -1.284016000 | 1.561791000 |

**S2TIIDTS6-CS** E=-3253.464394 Hartree

|   |              |              |              |
|---|--------------|--------------|--------------|
| 6 | -1.223662000 | 1.742179000  | -0.738740000 |
| 6 | -0.608476000 | 0.435601000  | -0.672056000 |
| 6 | -1.468243000 | -0.672066000 | -0.421188000 |
| 6 | -2.815988000 | -0.476052000 | -0.274139000 |
| 6 | -3.424241000 | 0.823712000  | -0.363907000 |
| 6 | -2.567882000 | 1.948893000  | -0.600311000 |
| 6 | 1.016273000  | 2.081895000  | -0.981906000 |
| 6 | 0.786991000  | 0.598757000  | -0.809480000 |
| 1 | -1.052330000 | -1.667472000 | -0.374701000 |
| 1 | -3.449328000 | -1.336682000 | -0.088122000 |
| 1 | -2.977049000 | 2.949491000  | -0.659496000 |
| 6 | 1.839455000  | -0.350351000 | -0.849818000 |
| 6 | 3.230754000  | -0.207513000 | -0.633142000 |
| 6 | 1.622999000  | -1.794207000 | -1.219273000 |
| 6 | 3.851651000  | -1.494767000 | -0.841847000 |
| 6 | 4.073854000  | 0.854921000  | -0.206458000 |
| 6 | 5.192053000  | -1.719299000 | -0.676220000 |
| 6 | 5.417543000  | 0.638522000  | -0.031812000 |
| 1 | 3.653746000  | 1.836904000  | -0.048050000 |
| 6 | 6.030560000  | -0.635803000 | -0.263671000 |
| 1 | 5.605501000  | -2.705215000 | -0.848251000 |
| 1 | 6.038109000  | 1.468779000  | 0.289631000  |
| 8 | 0.593596000  | -2.381241000 | -1.522219000 |
| 8 | 2.058243000  | 2.695657000  | -1.163429000 |
| 7 | 2.876654000  | -2.405773000 | -1.204713000 |
| 7 | -0.235277000 | 2.690242000  | -0.940670000 |
| 6 | -0.431707000 | 4.116976000  | -1.089062000 |
| 1 | -1.066313000 | 4.336069000  | -1.954307000 |
| 1 | -0.890850000 | 4.545284000  | -0.191408000 |
| 1 | 0.550909000  | 4.564418000  | -1.240486000 |

|    |               |              |              |
|----|---------------|--------------|--------------|
| 6  | 3.081416000   | -3.802100000 | -1.526261000 |
| 1  | 3.750574000   | -3.911905000 | -2.386444000 |
| 1  | 3.503700000   | -4.344229000 | -0.672937000 |
| 1  | 2.106066000   | -4.222231000 | -1.773261000 |
| 6  | -4.816977000  | 0.990483000  | -0.217626000 |
| 6  | -5.554652000  | 2.201842000  | -0.287878000 |
| 16 | -5.910319000  | -0.368451000 | 0.094036000  |
| 6  | -6.904760000  | 2.053450000  | -0.104478000 |
| 1  | -5.093517000  | 3.164386000  | -0.472692000 |
| 6  | -7.315622000  | 0.699343000  | 0.124391000  |
| 1  | -7.631946000  | 2.850591000  | -0.122028000 |
| 6  | 7.420956000   | -0.825217000 | -0.085584000 |
| 6  | 8.172897000   | -2.012391000 | -0.276031000 |
| 16 | 8.500641000   | 0.468980000  | 0.434852000  |
| 6  | 9.517708000   | -1.887262000 | -0.020793000 |
| 1  | 7.720178000   | -2.941555000 | -0.598379000 |
| 6  | 9.920936000   | -0.585702000 | 0.390599000  |
| 1  | 10.216823000  | -2.707151000 | -0.122873000 |
| 6  | -8.617207000  | 0.230275000  | 0.344505000  |
| 6  | -9.757343000  | 1.143629000  | 0.363128000  |
| 6  | -8.821693000  | -1.192869000 | 0.556549000  |
| 6  | -11.246700000 | -0.801691000 | 0.797133000  |
| 8  | -7.891431000  | -2.002244000 | 0.551627000  |
| 7  | -10.140473000 | -1.632681000 | 0.772323000  |
| 6  | -10.331552000 | -3.076083000 | 0.983703000  |
| 1  | -10.997386000 | -3.476657000 | 0.218078000  |
| 1  | -9.351196000  | -3.540378000 | 0.925364000  |
| 1  | -10.786172000 | -3.249698000 | 1.960025000  |
| 7  | -11.023215000 | 0.548236000  | 0.593990000  |
| 6  | -12.179771000 | 1.458168000  | 0.614973000  |
| 1  | -12.891348000 | 1.169083000  | -0.159743000 |
| 1  | -12.681033000 | 1.396192000  | 1.581925000  |
| 1  | -11.801511000 | 2.460655000  | 0.438538000  |
| 8  | -9.683923000  | 2.358549000  | 0.195829000  |
| 16 | -12.785982000 | -1.408146000 | 1.062098000  |
| 6  | 11.207235000  | -0.139699000 | 0.721260000  |
| 6  | 11.456747000  | 1.223506000  | 1.124078000  |
| 6  | 12.340911000  | -1.034389000 | 0.671269000  |
| 6  | 12.700809000  | 1.658997000  | 1.445554000  |
| 1  | 10.620029000  | 1.915745000  | 1.169038000  |
| 6  | 13.592507000  | -0.617790000 | 0.989032000  |
| 1  | 12.184185000  | -2.065329000 | 0.371525000  |
| 6  | 13.867843000  | 0.765414000  | 1.401858000  |
| 1  | 12.884513000  | 2.684920000  | 1.747943000  |

|   |              |              |             |
|---|--------------|--------------|-------------|
| 1 | 14.442340000 | -1.291677000 | 0.950745000 |
| 8 | 15.004303000 | 1.153215000  | 1.693185000 |

**S2TIIDTS7-CS** E=-3007.393930 Hartree

|    |              |              |              |
|----|--------------|--------------|--------------|
| 6  | 1.038687000  | -1.780742000 | -1.033775000 |
| 6  | 0.443652000  | -0.475774000 | -0.864411000 |
| 6  | 1.325425000  | 0.604077000  | -0.579344000 |
| 6  | 2.675925000  | 0.383866000  | -0.488704000 |
| 6  | 3.260406000  | -0.913137000 | -0.675098000 |
| 6  | 2.384994000  | -2.011059000 | -0.953883000 |
| 6  | -1.211831000 | -2.084875000 | -1.217835000 |
| 6  | -0.960883000 | -0.616733000 | -0.962402000 |
| 1  | 0.926100000  | 1.600785000  | -0.465995000 |
| 1  | 3.327126000  | 1.227982000  | -0.287597000 |
| 1  | 2.778021000  | -3.011912000 | -1.080430000 |
| 6  | -2.002756000 | 0.339975000  | -0.905740000 |
| 6  | -3.391875000 | 0.194800000  | -0.662041000 |
| 6  | -1.781438000 | 1.806190000  | -1.175413000 |
| 6  | -4.002479000 | 1.498884000  | -0.762046000 |
| 6  | -4.235580000 | -0.885808000 | -0.288398000 |
| 6  | -5.335869000 | 1.724664000  | -0.544955000 |
| 6  | -5.572286000 | -0.668972000 | -0.062167000 |
| 1  | -3.823454000 | -1.880647000 | -0.210437000 |
| 6  | -6.175560000 | 0.623683000  | -0.187349000 |
| 1  | -5.741536000 | 2.724540000  | -0.635695000 |
| 1  | -6.193516000 | -1.513935000 | 0.216886000  |
| 8  | -0.754651000 | 2.405411000  | -1.461724000 |
| 8  | -2.265461000 | -2.677924000 | -1.400914000 |
| 7  | -3.027643000 | 2.425114000  | -1.084949000 |
| 7  | 0.033333000  | -2.705521000 | -1.258208000 |
| 6  | 0.208729000  | -4.121724000 | -1.502926000 |
| 1  | 0.811695000  | -4.290983000 | -2.401320000 |
| 1  | 0.692549000  | -4.610362000 | -0.650142000 |
| 1  | -0.783310000 | -4.549703000 | -1.648910000 |
| 6  | -3.226233000 | 3.842610000  | -1.301245000 |
| 1  | -3.916705000 | 4.018528000  | -2.133087000 |
| 1  | -3.620185000 | 4.326235000  | -0.400549000 |
| 1  | -2.253518000 | 4.271001000  | -1.544293000 |
| 6  | 4.655785000  | -1.112372000 | -0.575017000 |
| 6  | 5.387827000  | -2.305716000 | -0.806166000 |
| 16 | 5.765451000  | 0.181509000  | -0.129347000 |
| 6  | 6.743161000  | -2.188265000 | -0.629596000 |
| 1  | 4.913677000  | -3.229826000 | -1.112399000 |

|    |               |              |              |
|----|---------------|--------------|--------------|
| 6  | 7.171051000   | -0.875509000 | -0.249319000 |
| 1  | 7.462008000   | -2.985855000 | -0.749860000 |
| 6  | -7.559823000  | 0.814400000  | 0.041111000  |
| 6  | -8.302136000  | 2.018538000  | -0.046969000 |
| 16 | -8.639445000  | -0.501921000 | 0.500488000  |
| 6  | -9.641731000  | 1.888958000  | 0.235706000  |
| 1  | -7.847533000  | 2.963239000  | -0.317304000 |
| 6  | -10.048232000 | 0.566587000  | 0.567461000  |
| 1  | -10.333935000 | 2.720549000  | 0.208980000  |
| 6  | 8.477226000   | -0.532551000 | 0.111974000  |
| 6  | 9.476919000   | -1.596260000 | 0.457684000  |
| 6  | 9.066700000   | 0.745065000  | 0.463209000  |
| 6  | 10.547812000  | -0.912568000 | 1.222286000  |
| 6  | 10.284794000  | 0.467837000  | 1.275919000  |
| 6  | 11.654072000  | -1.485480000 | 1.833055000  |
| 6  | 11.154332000  | 1.301096000  | 1.984496000  |
| 6  | 12.520012000  | -0.648577000 | 2.541300000  |
| 1  | 11.821629000  | -2.554791000 | 1.753882000  |
| 6  | 12.262769000  | 0.724616000  | 2.616402000  |
| 1  | 10.989855000  | 2.367010000  | 2.063972000  |
| 1  | 13.392786000  | -1.061437000 | 3.037716000  |
| 1  | 12.937600000  | 1.364704000  | 3.176556000  |
| 8  | 9.431549000   | -2.794567000 | 0.213584000  |
| 6  | 8.700482000   | 2.006168000  | 0.009348000  |
| 6  | 7.817449000   | 2.230765000  | -1.088161000 |
| 7  | 7.149500000   | 2.465216000  | -2.014093000 |
| 6  | 9.295778000   | 3.208193000  | 0.500522000  |
| 7  | 9.744727000   | 4.209709000  | 0.892768000  |
| 6  | -11.330625000 | 0.110355000  | 0.902214000  |
| 6  | -11.584173000 | -1.274967000 | 1.216517000  |
| 6  | -12.454823000 | 1.016872000  | 0.945792000  |
| 6  | -12.823922000 | -1.720184000 | 1.541896000  |
| 1  | -10.754405000 | -1.976449000 | 1.189935000  |
| 6  | -13.702022000 | 0.590938000  | 1.268986000  |
| 1  | -12.294660000 | 2.064608000  | 0.713774000  |
| 6  | -13.981431000 | -0.814849000 | 1.592960000  |
| 1  | -13.010812000 | -2.762887000 | 1.777579000  |
| 1  | -14.544922000 | 1.273790000  | 1.301156000  |
| 8  | -15.113905000 | -1.211336000 | 1.888482000  |

**S2TIIDTS8-CS** E=-3442.613433 Hartree

|   |              |             |              |
|---|--------------|-------------|--------------|
| 6 | -4.464231000 | 1.541415000 | -0.738664000 |
|---|--------------|-------------|--------------|

|    |               |              |              |
|----|---------------|--------------|--------------|
| 6  | -3.837927000  | 0.243742000  | -0.659300000 |
| 6  | -4.666943000  | -0.852205000 | -0.299340000 |
| 6  | -6.006055000  | -0.655190000 | -0.067387000 |
| 6  | -6.625075000  | 0.631274000  | -0.173099000 |
| 6  | -5.800140000  | 1.747550000  | -0.515940000 |
| 6  | -2.248114000  | 1.883278000  | -1.151111000 |
| 6  | -2.450237000  | 0.409999000  | -0.904062000 |
| 1  | -4.242592000  | -1.842852000 | -0.235941000 |
| 1  | -6.615894000  | -1.511790000 | 0.201053000  |
| 1  | -6.218201000  | 2.743515000  | -0.591805000 |
| 6  | -1.397427000  | -0.531885000 | -0.978342000 |
| 6  | 0.006494000   | -0.375199000 | -0.886944000 |
| 6  | -1.631342000  | -2.001018000 | -1.251301000 |
| 6  | 0.615635000   | -1.670308000 | -1.076967000 |
| 6  | 0.876613000   | 0.711232000  | -0.593003000 |
| 6  | 1.965465000   | -1.885401000 | -1.008568000 |
| 6  | 2.230441000   | 0.506054000  | -0.513378000 |
| 1  | 0.466140000   | 1.701443000  | -0.464097000 |
| 6  | 2.828384000   | -0.780840000 | -0.720935000 |
| 1  | 2.369618000   | -2.879916000 | -1.148916000 |
| 1  | 2.872372000   | 1.355606000  | -0.305452000 |
| 8  | -2.678665000  | -2.604008000 | -1.436097000 |
| 8  | -1.229663000  | 2.499923000  | -1.429476000 |
| 7  | -0.379210000  | -2.604965000 | -1.306996000 |
| 7  | -3.501878000  | 2.484527000  | -1.049535000 |
| 6  | -3.718954000  | 3.902691000  | -1.243668000 |
| 1  | -4.412083000  | 4.082453000  | -2.072425000 |
| 1  | -4.118506000  | 4.366846000  | -0.335275000 |
| 1  | -2.752080000  | 4.347455000  | -1.480425000 |
| 6  | -0.186962000  | -4.015945000 | -1.570728000 |
| 1  | 0.411921000   | -4.165653000 | -2.475204000 |
| 1  | 0.308996000   | -4.508326000 | -0.727258000 |
| 1  | -1.174160000  | -4.455261000 | -1.715500000 |
| 6  | -8.011727000  | 0.801503000  | 0.060243000  |
| 6  | -8.768319000  | 1.998086000  | -0.008427000 |
| 16 | -9.073915000  | -0.534490000 | 0.500267000  |
| 6  | -10.105744000 | 1.847900000  | 0.274001000  |
| 1  | -8.325441000  | 2.952208000  | -0.264570000 |
| 6  | -10.495406000 | 0.515644000  | 0.585799000  |
| 1  | -10.807960000 | 2.671372000  | 0.261176000  |
| 6  | 4.227682000   | -0.964920000 | -0.632642000 |
| 6  | 4.972745000   | -2.141127000 | -0.897569000 |
| 16 | 5.320993000   | 0.335132000  | -0.164520000 |
| 6  | 6.327855000   | -2.007026000 | -0.729575000 |



|    |               |              |              |
|----|---------------|--------------|--------------|
| 1  | 4.511196000   | -3.063830000 | -1.225401000 |
| 6  | 6.738179000   | -0.699546000 | -0.318434000 |
| 1  | 7.037939000   | -2.803936000 | -0.905311000 |
| 6  | 8.035749000   | -0.342475000 | 0.042377000  |
| 6  | 8.646856000   | 0.904883000  | 0.389482000  |
| 6  | 10.260657000  | -0.633115000 | 1.327311000  |
| 6  | 9.841657000   | 0.704147000  | 1.259549000  |
| 6  | 11.367590000  | -1.060308000 | 2.043148000  |
| 6  | 10.584086000  | 1.650228000  | 1.982137000  |
| 6  | 12.094372000  | -0.101500000 | 2.751237000  |
| 1  | 11.648235000  | -2.108136000 | 2.056125000  |
| 6  | 11.695403000  | 1.237078000  | 2.719343000  |
| 1  | 10.306272000  | 2.694337000  | 1.989487000  |
| 1  | 12.963348000  | -0.398336000 | 3.329573000  |
| 1  | 12.256474000  | 1.978266000  | 3.279627000  |
| 6  | 8.251497000   | 2.147494000  | -0.117527000 |
| 6  | 8.747073000   | 3.397920000  | 0.354608000  |
| 7  | 9.108769000   | 4.444707000  | 0.719947000  |
| 6  | 7.410158000   | 2.282529000  | -1.258713000 |
| 7  | 6.761810000   | 2.437742000  | -2.215385000 |
| 16 | 9.195168000   | -1.700352000 | 0.382310000  |
| 8  | 8.581343000   | -2.711087000 | 1.258260000  |
| 8  | 9.849462000   | -2.154336000 | -0.855779000 |
| 6  | -11.771495000 | 0.038727000  | 0.915067000  |
| 6  | -12.007187000 | -1.354583000 | 1.208403000  |
| 6  | -12.906584000 | 0.931075000  | 0.973839000  |
| 6  | -13.240738000 | -1.819902000 | 1.528405000  |
| 1  | -11.168848000 | -2.045165000 | 1.170043000  |
| 6  | -14.147838000 | 0.485012000  | 1.291939000  |
| 1  | -12.759447000 | 1.984040000  | 0.757710000  |
| 6  | -14.409165000 | -0.929261000 | 1.594531000  |
| 1  | -13.414761000 | -2.868210000 | 1.748408000  |
| 1  | -14.999163000 | 1.156620000  | 1.335722000  |
| 8  | -15.535935000 | -1.343957000 | 1.885437000  |

**S2TIIDTS9-CS** E=-3428.556892 Hartree

|   |             |              |              |
|---|-------------|--------------|--------------|
| 6 | 3.617271000 | -1.511673000 | -0.801873000 |
| 6 | 2.999739000 | -0.220599000 | -0.620735000 |
| 6 | 3.852166000 | 0.847986000  | -0.229434000 |
| 6 | 5.196567000 | 0.630495000  | -0.055695000 |
| 6 | 5.804450000 | -0.651097000 | -0.255214000 |
| 6 | 4.956982000 | -1.739293000 | -0.636959000 |

|    |              |              |              |
|----|--------------|--------------|--------------|
| 6  | 1.385673000  | -1.816075000 | -1.159552000 |
| 6  | 1.605452000  | -0.363773000 | -0.822820000 |
| 1  | 3.436520000  | 1.835961000  | -0.097284000 |
| 1  | 5.822890000  | 1.466714000  | 0.238179000  |
| 1  | 5.364812000  | -2.731736000 | -0.784695000 |
| 6  | 0.553714000  | 0.587173000  | -0.794660000 |
| 6  | -0.849104000 | 0.422449000  | -0.651644000 |
| 6  | 0.780809000  | 2.059256000  | -0.976003000 |
| 6  | -1.464116000 | 1.725500000  | -0.727416000 |
| 6  | -1.708484000 | -0.678129000 | -0.392079000 |
| 6  | -2.810086000 | 1.935043000  | -0.588260000 |
| 6  | -3.059938000 | -0.479265000 | -0.245560000 |
| 1  | -1.294703000 | -1.674098000 | -0.339214000 |
| 6  | -3.665858000 | 0.813684000  | -0.343518000 |
| 1  | -3.215423000 | 2.937273000  | -0.655819000 |
| 1  | -3.690624000 | -1.342016000 | -0.053192000 |
| 8  | 1.818244000  | 2.684379000  | -1.163083000 |
| 8  | 0.353931000  | -2.411420000 | -1.445165000 |
| 7  | -0.475090000 | 2.669524000  | -0.938268000 |
| 7  | 2.636416000  | -2.430555000 | -1.136528000 |
| 6  | 2.836704000  | -3.832970000 | -1.426263000 |
| 1  | 3.503763000  | -3.965161000 | -2.285303000 |
| 1  | 3.261333000  | -4.357656000 | -0.562835000 |
| 1  | 1.859409000  | -4.256116000 | -1.660719000 |
| 6  | -0.666944000 | 4.093630000  | -1.095312000 |
| 1  | -1.301665000 | 4.312226000  | -1.961433000 |
| 1  | -1.123631000 | 4.532137000  | -0.200514000 |
| 1  | 0.318156000  | 4.534992000  | -1.250425000 |
| 6  | 7.195368000  | -0.845147000 | -0.077763000 |
| 6  | 7.942763000  | -2.034138000 | -0.244260000 |
| 16 | 8.285132000  | 0.456385000  | 0.413645000  |
| 6  | 9.291784000  | -1.908963000 | 0.005216000  |
| 1  | 7.487023000  | -2.968978000 | -0.546674000 |
| 6  | 9.701520000  | -0.603638000 | 0.387827000  |
| 1  | 9.987479000  | -2.733581000 | -0.081984000 |
| 6  | -5.060484000 | 0.987802000  | -0.200084000 |
| 6  | -5.809207000 | 2.193395000  | -0.272009000 |
| 16 | -6.158795000 | -0.365145000 | 0.112664000  |
| 6  | -7.161199000 | 2.047427000  | -0.089533000 |
| 1  | -5.341754000 | 3.151817000  | -0.458198000 |
| 6  | -7.577737000 | 0.702996000  | 0.140738000  |
| 1  | -7.862953000 | 2.873536000  | -0.116147000 |
| 6  | -8.855850000 | 0.241040000  | 0.355600000  |
| 16 | -9.224424000 | -1.459894000 | 0.627302000  |

|    |               |              |             |
|----|---------------|--------------|-------------|
| 16 | -10.257599000 | 1.316129000  | 0.379171000 |
| 6  | -10.971298000 | -1.253624000 | 0.806528000 |
| 6  | -11.458541000 | 0.056507000  | 0.689414000 |
| 6  | -11.847371000 | -2.313638000 | 1.051740000 |
| 6  | -12.825533000 | 0.314664000  | 0.816922000 |
| 6  | -13.210479000 | -2.051670000 | 1.178291000 |
| 1  | -11.469514000 | -3.326941000 | 1.142071000 |
| 6  | -13.696258000 | -0.745883000 | 1.061618000 |
| 1  | -13.202752000 | 1.328189000  | 0.726310000 |
| 1  | -13.895675000 | -2.871157000 | 1.368769000 |
| 1  | -14.758995000 | -0.550882000 | 1.161484000 |
| 6  | 10.993220000  | -0.153093000 | 0.707624000 |
| 6  | 11.250864000  | 1.214008000  | 1.080292000 |
| 6  | 12.122942000  | -1.048947000 | 0.675951000 |
| 6  | 12.499120000  | 1.652126000  | 1.391260000 |
| 1  | 10.417728000  | 1.911848000  | 1.111854000 |
| 6  | 13.378640000  | -0.629957000 | 0.983564000 |
| 1  | 11.963325000  | -2.086181000 | 0.398527000 |
| 6  | 13.662634000  | 0.757502000  | 1.366401000 |
| 1  | 12.684561000  | 2.684396000  | 1.671004000 |
| 1  | 14.224404000  | -1.309952000 | 0.957681000 |
| 8  | 14.803901000  | 1.147830000  | 1.648696000 |

**S2TIIDTS10-CS** E=-3274.898293 Hartree

|   |              |              |              |
|---|--------------|--------------|--------------|
| 6 | 2.529835000  | -1.525747000 | -0.695934000 |
| 6 | 1.881926000  | -0.245064000 | -0.549570000 |
| 6 | 2.708847000  | 0.855640000  | -0.201486000 |
| 6 | 4.061777000  | 0.678770000  | -0.039043000 |
| 6 | 4.700607000  | -0.590552000 | -0.206935000 |
| 6 | 3.877653000  | -1.712863000 | -0.541759000 |
| 6 | 0.299052000  | -1.894703000 | -1.013081000 |
| 6 | 0.486208000  | -0.432652000 | -0.732649000 |
| 1 | 2.270041000  | 1.836330000  | -0.093563000 |
| 1 | 4.667200000  | 1.541660000  | 0.221837000  |
| 1 | 4.308495000  | -2.699067000 | -0.664824000 |
| 6 | -0.587672000 | 0.493206000  | -0.721596000 |
| 6 | -1.982159000 | 0.304791000  | -0.559946000 |
| 6 | -0.396904000 | 1.969400000  | -0.957403000 |
| 6 | -2.627157000 | 1.590334000  | -0.669354000 |
| 6 | -2.816064000 | -0.806527000 | -0.258430000 |
| 6 | -3.975119000 | 1.775790000  | -0.519073000 |
| 6 | -4.168720000 | -0.631951000 | -0.100239000 |

|    |               |              |              |
|----|---------------|--------------|--------------|
| 1  | -2.379306000  | -1.791281000 | -0.182242000 |
| 6  | -4.803412000  | 0.645628000  | -0.228295000 |
| 1  | -4.403927000  | 2.766177000  | -0.610539000 |
| 1  | -4.780250000  | -1.499964000 | 0.124459000  |
| 8  | 0.625454000   | 2.606181000  | -1.180750000 |
| 8  | -0.718677000  | -2.530568000 | -1.262107000 |
| 7  | -1.662505000  | 2.551810000  | -0.921577000 |
| 7  | 1.568625000   | -2.476793000 | -0.988056000 |
| 6  | 1.798264000   | -3.882926000 | -1.232094000 |
| 1  | 2.454779000   | -4.030413000 | -2.097008000 |
| 1  | 2.248108000   | -4.367688000 | -0.357921000 |
| 1  | 0.827414000   | -4.335982000 | -1.435748000 |
| 6  | -1.891392000  | 3.965205000  | -1.123325000 |
| 1  | -2.544366000  | 4.138033000  | -1.985966000 |
| 1  | -2.345862000  | 4.421969000  | -0.236788000 |
| 1  | -0.920342000  | 4.425447000  | -1.308699000 |
| 6  | 6.096372000   | -0.741854000 | -0.044682000 |
| 6  | 6.876071000   | -1.921315000 | -0.178402000 |
| 16 | 7.154469000   | 0.613053000  | 0.380140000  |
| 6  | 8.220745000   | -1.755441000 | 0.043397000  |
| 1  | 6.436916000   | -2.876269000 | -0.437178000 |
| 6  | 8.597956000   | -0.420687000 | 0.369926000  |
| 1  | 8.943318000   | -2.561363000 | -0.021509000 |
| 6  | -6.202144000  | 0.795571000  | -0.069097000 |
| 6  | -6.974443000  | 1.975682000  | -0.171569000 |
| 16 | -7.269977000  | -0.560849000 | 0.308803000  |
| 6  | -8.325023000  | 1.803142000  | 0.038817000  |
| 1  | -6.535319000  | 2.939104000  | -0.399773000 |
| 6  | -8.710817000  | 0.465897000  | 0.323022000  |
| 1  | -9.038531000  | 2.615734000  | -0.008009000 |
| 6  | 9.859748000   | 0.058294000  | 0.643653000  |
| 16 | 10.191135000  | 1.747077000  | 1.036350000  |
| 16 | 11.299997000  | -0.969666000 | 0.632461000  |
| 6  | 11.923069000  | 1.540063000  | 1.233250000  |
| 6  | 12.423831000  | 0.311470000  | 1.050528000  |
| 1  | 13.469542000  | 0.044911000  | 1.140435000  |
| 1  | 12.502528000  | 2.417065000  | 1.493175000  |
| 6  | -9.997663000  | -0.034840000 | 0.582589000  |
| 6  | -10.229900000 | -1.429840000 | 0.854804000  |
| 6  | -11.147693000 | 0.835251000  | 0.587597000  |
| 6  | -11.473377000 | -1.916525000 | 1.107430000  |
| 1  | -9.381072000  | -2.109242000 | 0.856543000  |
| 6  | -12.398987000 | 0.367742000  | 0.838120000  |
| 1  | -11.007456000 | 1.892563000  | 0.385769000  |

|   |               |              |             |
|---|---------------|--------------|-------------|
| 6 | -12.657307000 | -1.048879000 | 1.118500000 |
| 1 | -11.639567000 | -2.969614000 | 1.311430000 |
| 1 | -13.260124000 | 1.028668000  | 0.840484000 |
| 8 | -13.794414000 | -1.483461000 | 1.348231000 |

**S2TIIDTS1-OS** E=-2586.808548 Hartree

|   |              |              |              |
|---|--------------|--------------|--------------|
| 6 | -1.904507000 | 1.583528000  | -0.483267000 |
| 6 | -1.268077000 | 0.308459000  | -0.436671000 |
| 6 | -2.098591000 | -0.815067000 | -0.280134000 |
| 6 | -3.476283000 | -0.658349000 | -0.202580000 |
| 6 | -4.094313000 | 0.609443000  | -0.273806000 |
| 6 | -3.271880000 | 1.753853000  | -0.410290000 |
| 6 | 0.329501000  | 2.042522000  | -0.570354000 |
| 6 | 0.170097000  | 0.532501000  | -0.487232000 |
| 1 | -1.664626000 | -1.801906000 | -0.245807000 |
| 1 | -4.091609000 | -1.547347000 | -0.109743000 |
| 1 | -3.702082000 | 2.747828000  | -0.425907000 |
| 6 | 1.245949000  | -0.341918000 | -0.506392000 |
| 6 | 2.678465000  | -0.127261000 | -0.350869000 |
| 6 | 1.097086000  | -1.830386000 | -0.765047000 |
| 6 | 3.322786000  | -1.391837000 | -0.504567000 |
| 6 | 3.494288000  | 0.970874000  | -0.025288000 |
| 6 | 4.683790000  | -1.571475000 | -0.380620000 |
| 6 | 4.865215000  | 0.804606000  | 0.108879000  |
| 1 | 3.054615000  | 1.947887000  | 0.098396000  |
| 6 | 5.495474000  | -0.449604000 | -0.071164000 |
| 1 | 5.116525000  | -2.556649000 | -0.502025000 |
| 1 | 5.465947000  | 1.676370000  | 0.347541000  |
| 8 | 0.093122000  | -2.492841000 | -0.984203000 |
| 8 | 1.343579000  | 2.719394000  | -0.661431000 |
| 7 | 2.374071000  | -2.370653000 | -0.766781000 |
| 7 | -0.945263000 | 2.583839000  | -0.579439000 |
| 6 | -1.202230000 | 4.006004000  | -0.670906000 |
| 1 | -1.800204000 | 4.236893000  | -1.558876000 |
| 1 | -1.729896000 | 4.366434000  | 0.218849000  |
| 1 | -0.236638000 | 4.506180000  | -0.745676000 |
| 6 | 2.640061000  | -3.774354000 | -1.002580000 |
| 1 | 3.283166000  | -3.907038000 | -1.879094000 |
| 1 | 3.122428000  | -4.232922000 | -0.132433000 |
| 1 | 1.680929000  | -4.260235000 | -1.181782000 |
| 6 | -5.536731000 | 0.756185000  | -0.206558000 |
| 6 | -6.306234000 | 1.873510000  | -0.517408000 |

|    |               |              |              |
|----|---------------|--------------|--------------|
| 16 | -6.576740000  | -0.555511000 | 0.315666000  |
| 6  | -7.683415000  | 1.685203000  | -0.351000000 |
| 1  | -5.878210000  | 2.798318000  | -0.884508000 |
| 6  | -8.035259000  | 0.408823000  | 0.099138000  |
| 1  | -8.412605000  | 2.455808000  | -0.566788000 |
| 6  | 6.924776000   | -0.598746000 | 0.059194000  |
| 6  | 7.702745000   | -1.744114000 | -0.167664000 |
| 16 | 7.954303000   | 0.741521000  | 0.558168000  |
| 6  | 9.063073000   | -1.565970000 | 0.043730000  |
| 1  | 7.277981000   | -2.686077000 | -0.491230000 |
| 6  | 9.397655000   | -0.254940000 | 0.450138000  |
| 1  | 9.814209000   | -2.335697000 | -0.085913000 |
| 6  | 10.680373000  | 0.240407000  | 0.742288000  |
| 6  | 11.810117000  | -0.615044000 | 0.641701000  |
| 7  | 12.720611000  | -1.338612000 | 0.551093000  |
| 6  | 10.888378000  | 1.586071000  | 1.140856000  |
| 7  | 11.034523000  | 2.696888000  | 1.467006000  |
| 6  | -9.340278000  | -0.114343000 | 0.371477000  |
| 6  | -10.501746000 | 0.715777000  | 0.240848000  |
| 6  | -9.533553000  | -1.472008000 | 0.781902000  |
| 6  | -11.753798000 | 0.236482000  | 0.496897000  |
| 1  | -10.380972000 | 1.750102000  | -0.063666000 |
| 6  | -10.777268000 | -1.971607000 | 1.043151000  |
| 1  | -8.667645000  | -2.120684000 | 0.882883000  |
| 6  | -11.974194000 | -1.144681000 | 0.916731000  |
| 1  | -12.632869000 | 0.865492000  | 0.399746000  |
| 1  | -10.922369000 | -3.001737000 | 1.352107000  |
| 8  | -13.113391000 | -1.590635000 | 1.152409000  |

**S2TIIDTS3-OS** E=-3154.665980 Hartree

|   |              |              |              |
|---|--------------|--------------|--------------|
| 6 | -1.522485000 | -1.507270000 | 0.268966000  |
| 6 | -0.914385000 | -0.224148000 | 0.156360000  |
| 6 | -1.765733000 | 0.868678000  | -0.069420000 |
| 6 | -3.140981000 | 0.677263000  | -0.152771000 |
| 6 | -3.729268000 | -0.596193000 | -0.015366000 |
| 6 | -2.886902000 | -1.711550000 | 0.198214000  |
| 6 | 0.719321000  | -1.912443000 | 0.424851000  |
| 6 | 0.533947000  | -0.415083000 | 0.246331000  |
| 1 | -1.352530000 | 1.859880000  | -0.166939000 |
| 1 | -3.770559000 | 1.539346000  | -0.348785000 |
| 1 | -3.301228000 | -2.704152000 | 0.327418000  |
| 6 | 1.589755000  | 0.478053000  | 0.228100000  |
| 6 | 3.035541000  | 0.286340000  | 0.136648000  |

|    |               |              |              |
|----|---------------|--------------|--------------|
| 6  | 1.403809000   | 1.983369000  | 0.357486000  |
| 6  | 3.643820000   | 1.572648000  | 0.200251000  |
| 6  | 3.888147000   | -0.813277000 | -0.055402000 |
| 6  | 5.006534000   | 1.775981000  | 0.112706000  |
| 6  | 5.261656000   | -0.623170000 | -0.154935000 |
| 1  | 3.475779000   | -1.807904000 | -0.114271000 |
| 6  | 5.851077000   | 0.655305000  | -0.067630000 |
| 1  | 5.419312000   | 2.773588000  | 0.201211000  |
| 1  | 5.891570000   | -1.491061000 | -0.320912000 |
| 8  | 0.380104000   | 2.638907000  | 0.488951000  |
| 8  | 1.742091000   | -2.566427000 | 0.570547000  |
| 7  | 2.666704000   | 2.549309000  | 0.352019000  |
| 7  | -0.545795000  | -2.477617000 | 0.448454000  |
| 6  | -0.776462000  | -3.896231000 | 0.624371000  |
| 1  | -1.378535000  | -4.085081000 | 1.519544000  |
| 1  | -1.288459000  | -4.320068000 | -0.246449000 |
| 1  | 0.197850000   | -4.371546000 | 0.737763000  |
| 6  | 2.898125000   | 3.973115000  | 0.478097000  |
| 1  | 3.506879000   | 4.191861000  | 1.361836000  |
| 1  | 3.403954000   | 4.366882000  | -0.410212000 |
| 1  | 1.924762000   | 4.452404000  | 0.582440000  |
| 6  | -5.170170000  | -0.781024000 | -0.095310000 |
| 6  | -5.878957000  | -1.956093000 | -0.315497000 |
| 16 | -6.278217000  | 0.564589000  | 0.094344000  |
| 6  | -7.271251000  | -1.788187000 | -0.344688000 |
| 1  | -5.394994000  | -2.910322000 | -0.482580000 |
| 6  | -7.680382000  | -0.471211000 | -0.143815000 |
| 1  | -7.970124000  | -2.598079000 | -0.520423000 |
| 6  | 7.290220000   | 0.838309000  | -0.164372000 |
| 6  | 7.997499000   | 2.013104000  | -0.392985000 |
| 16 | 8.404001000   | -0.503797000 | 0.008916000  |
| 6  | 9.388237000   | 1.844891000  | -0.437724000 |
| 1  | 7.513795000   | 2.968989000  | -0.553290000 |
| 6  | 9.809948000   | 0.527522000  | -0.241996000 |
| 1  | 10.073672000  | 2.662105000  | -0.623560000 |
| 6  | -9.003635000  | 0.047733000  | -0.113039000 |
| 6  | -9.413329000  | 1.385459000  | 0.051062000  |
| 16 | -10.431255000 | -0.954265000 | -0.284322000 |
| 1  | -8.715914000  | 2.207723000  | 0.176414000  |
| 6  | -11.431256000 | 0.510329000  | -0.122517000 |
| 6  | -12.833872000 | 0.470188000  | -0.169619000 |
| 6  | -13.520086000 | -0.758263000 | -0.352241000 |
| 7  | -14.057802000 | -1.782654000 | -0.503575000 |
| 6  | -13.597495000 | 1.659869000  | -0.035222000 |

|   |               |              |              |
|---|---------------|--------------|--------------|
| 7 | -14.252528000 | 2.618223000  | 0.071730000  |
| 7 | -10.719897000 | 1.635295000  | 0.045962000  |
| 6 | 11.146551000  | 0.008607000  | -0.225513000 |
| 6 | 11.406212000  | -1.389217000 | -0.064671000 |
| 6 | 12.271209000  | 0.884764000  | -0.369845000 |
| 6 | 12.679174000  | -1.884541000 | -0.048060000 |
| 1 | 10.568120000  | -2.072582000 | 0.042002000  |
| 6 | 13.551530000  | 0.410687000  | -0.356281000 |
| 1 | 12.100348000  | 1.949757000  | -0.487141000 |
| 6 | 13.839667000  | -1.011163000 | -0.193920000 |
| 1 | 12.874454000  | -2.945279000 | 0.071870000  |
| 1 | 14.403385000  | 1.074512000  | -0.463740000 |
| 8 | 15.005212000  | -1.452751000 | -0.180869000 |

**S2TIIDTS4-OS** E=-3120.689517 Hartree

|   |              |              |              |
|---|--------------|--------------|--------------|
| 6 | -2.012784000 | 1.638150000  | -0.600752000 |
| 6 | -1.408658000 | 0.347799000  | -0.534934000 |
| 6 | -2.265408000 | -0.747065000 | -0.323166000 |
| 6 | -3.634875000 | -0.550305000 | -0.211191000 |
| 6 | -4.224066000 | 0.732444000  | -0.302389000 |
| 6 | -3.371223000 | 1.848943000  | -0.496600000 |
| 6 | 0.230853000  | 2.031424000  | -0.764914000 |
| 6 | 0.033585000  | 0.530932000  | -0.632935000 |
| 1 | -1.857679000 | -1.744192000 | -0.270608000 |
| 1 | -4.268375000 | -1.419379000 | -0.067001000 |
| 1 | -3.771785000 | 2.854290000  | -0.539223000 |
| 6 | 1.084651000  | -0.372446000 | -0.654678000 |
| 6 | 2.528547000  | -0.193956000 | -0.546894000 |
| 6 | 0.888018000  | -1.864058000 | -0.859536000 |
| 6 | 3.131383000  | -1.479039000 | -0.675315000 |
| 6 | 3.383939000  | 0.888421000  | -0.280543000 |
| 6 | 4.491311000  | -1.694836000 | -0.577693000 |
| 6 | 4.754897000  | 0.685916000  | -0.177532000 |
| 1 | 2.976096000  | 1.882015000  | -0.181662000 |
| 6 | 5.339857000  | -0.589449000 | -0.329925000 |
| 1 | 4.894787000  | -2.697023000 | -0.657638000 |
| 1 | 5.391275000  | 1.546890000  | -0.000034000 |
| 8 | -0.139407000 | -2.505032000 | -1.031575000 |
| 8 | 1.258954000  | 2.679430000  | -0.903702000 |
| 7 | 2.148643000  | -2.440113000 | -0.875707000 |
| 7 | -1.029106000 | 2.607591000  | -0.754784000 |
| 6 | -1.249717000 | 4.032379000  | -0.881902000 |
| 1 | -1.866021000 | 4.254493000  | -1.759725000 |



|    |               |              |              |
|----|---------------|--------------|--------------|
| 1  | -1.742597000  | 4.433871000  | 0.010434000  |
| 1  | -0.273118000  | 4.502585000  | -0.997811000 |
| 6  | 2.369416000   | -3.857273000 | -1.070524000 |
| 1  | 2.987593000   | -4.037125000 | -1.956656000 |
| 1  | 2.860221000   | -4.301336000 | -0.197435000 |
| 1  | 1.392961000   | -4.321057000 | -1.210984000 |
| 6  | -5.654837000  | 0.915163000  | -0.196385000 |
| 6  | -6.388291000  | 2.087888000  | -0.418835000 |
| 16 | -6.725157000  | -0.407707000 | 0.255418000  |
| 6  | -7.757919000  | 1.941887000  | -0.241062000 |
| 1  | -5.931535000  | 3.022042000  | -0.721415000 |
| 6  | -8.146736000  | 0.635368000  | 0.133153000  |
| 1  | -8.475698000  | 2.742352000  | -0.378908000 |
| 6  | 6.776043000   | -0.783994000 | -0.235012000 |
| 6  | 7.525315000   | -1.888941000 | -0.626126000 |
| 16 | 7.832794000   | 0.442698000  | 0.438458000  |
| 6  | 8.901659000   | -1.756808000 | -0.402407000 |
| 1  | 7.084551000   | -2.762152000 | -1.091506000 |
| 6  | 9.272438000   | -0.538825000 | 0.174778000  |
| 1  | 9.617114000   | -2.524490000 | -0.668979000 |
| 6  | -9.437777000  | 0.180095000  | 0.384668000  |
| 6  | -9.758786000  | -1.193290000 | 0.763853000  |
| 16 | -10.885383000 | 1.179016000  | 0.286014000  |
| 6  | -11.936363000 | -0.235261000 | 0.749416000  |
| 7  | -11.142842000 | -1.346052000 | 0.945498000  |
| 6  | -11.739145000 | -2.621791000 | 1.328081000  |
| 1  | -12.444462000 | -2.951972000 | 0.562212000  |
| 1  | -10.925194000 | -3.339333000 | 1.425905000  |
| 1  | -12.269343000 | -2.519259000 | 2.277497000  |
| 8  | -13.137353000 | -0.180269000 | 0.860717000  |
| 8  | -8.952777000  | -2.105401000 | 0.910283000  |
| 6  | 10.581618000  | -0.080406000 | 0.532154000  |
| 6  | 10.798337000  | 1.229595000  | 1.066194000  |
| 6  | 11.724116000  | -0.929626000 | 0.364912000  |
| 6  | 12.046060000  | 1.667372000  | 1.408174000  |
| 1  | 9.947467000   | 1.892740000  | 1.196960000  |
| 6  | 12.979699000  | -0.511811000 | 0.700283000  |
| 1  | 11.585577000  | -1.929808000 | -0.032257000 |
| 6  | 13.223815000  | 0.820023000  | 1.246301000  |
| 1  | 12.208247000  | 2.662113000  | 1.810608000  |
| 1  | 13.843993000  | -1.156266000 | 0.575252000  |
| 8  | 14.366725000  | 1.209794000  | 1.554948000  |

S2TIIDTS5-OS E=-2892.152355 Hartree

|    |              |              |              |
|----|--------------|--------------|--------------|
| 6  | 1.622673000  | -1.647520000 | -0.603589000 |
| 6  | 1.015825000  | -0.356807000 | -0.557022000 |
| 6  | 1.869084000  | 0.745071000  | -0.369094000 |
| 6  | 3.239714000  | 0.555024000  | -0.262631000 |
| 6  | 3.831833000  | -0.728102000 | -0.336598000 |
| 6  | 2.982670000  | -1.851344000 | -0.505763000 |
| 6  | -0.620940000 | -2.048807000 | -0.743672000 |
| 6  | -0.426634000 | -0.545973000 | -0.642751000 |
| 1  | 1.458118000  | 1.741462000  | -0.331228000 |
| 1  | 3.871511000  | 1.428034000  | -0.137466000 |
| 1  | 3.387229000  | -2.855545000 | -0.533218000 |
| 6  | -1.479263000 | 0.354964000  | -0.677411000 |
| 6  | -2.920329000 | 0.176947000  | -0.556811000 |
| 6  | -1.286657000 | 1.843682000  | -0.919879000 |
| 6  | -3.526891000 | 1.457686000  | -0.712664000 |
| 6  | -3.771345000 | -0.901278000 | -0.258338000 |
| 6  | -4.886387000 | 1.672343000  | -0.612215000 |
| 6  | -5.141426000 | -0.699509000 | -0.151814000 |
| 1  | -3.360277000 | -1.891103000 | -0.137412000 |
| 6  | -5.730690000 | 0.570923000  | -0.332194000 |
| 1  | -5.292878000 | 2.671099000  | -0.715106000 |
| 1  | -5.774361000 | -1.557132000 | 0.051798000  |
| 8  | -0.260801000 | 2.479867000  | -1.113557000 |
| 8  | -1.648248000 | -2.701384000 | -0.861456000 |
| 7  | -2.547843000 | 2.416122000  | -0.942481000 |
| 7  | 0.641189000  | -2.621457000 | -0.732818000 |
| 6  | 0.864854000  | -4.048318000 | -0.834726000 |
| 1  | 1.474579000  | -4.285034000 | -1.713190000 |
| 1  | 1.365525000  | -4.431162000 | 0.061332000  |
| 1  | -0.111238000 | -4.523234000 | -0.933986000 |
| 6  | -2.773532000 | 3.828159000  | -1.170192000 |
| 1  | -3.396892000 | 3.984508000  | -2.056986000 |
| 1  | -3.260510000 | 4.291292000  | -0.305076000 |
| 1  | -1.799351000 | 4.291247000  | -1.327290000 |
| 6  | 5.263808000  | -0.903055000 | -0.237935000 |
| 6  | 5.998476000  | -2.076164000 | -0.456313000 |
| 16 | 6.332283000  | 0.424519000  | 0.196676000  |
| 6  | 7.366711000  | -1.916832000 | -0.286897000 |
| 1  | 5.548048000  | -3.016066000 | -0.750197000 |
| 6  | 7.753761000  | -0.606816000 | 0.075677000  |
| 1  | 8.075757000  | -2.723004000 | -0.427288000 |
| 6  | -7.166105000 | 0.763649000  | -0.233047000 |
| 6  | -7.919191000 | 1.863208000  | -0.633833000 |

|    |               |              |              |
|----|---------------|--------------|--------------|
| 16 | -8.217705000  | -0.457311000 | 0.458269000  |
| 6  | -9.293770000  | 1.731219000  | -0.402987000 |
| 1  | -7.482416000  | 2.732428000  | -1.110227000 |
| 6  | -9.659689000  | 0.518863000  | 0.189885000  |
| 1  | -10.011722000 | 2.494669000  | -0.674724000 |
| 6  | 9.071122000   | -0.149421000 | 0.318809000  |
| 6  | 10.193690000  | -1.003052000 | 0.223791000  |
| 6  | 9.291894000   | 1.263544000  | 0.683946000  |
| 6  | 11.470253000  | -0.550562000 | 0.458073000  |
| 1  | 10.059181000  | -2.045788000 | -0.039973000 |
| 6  | 11.739861000  | 0.852485000  | 0.822210000  |
| 6  | 12.586552000  | -1.428722000 | 0.356308000  |
| 7  | 13.469969000  | -2.181434000 | 0.261988000  |
| 8  | 8.365899000   | 2.067914000  | 0.791329000  |
| 8  | 12.865065000  | 1.279632000  | 1.034872000  |
| 7  | 10.603035000  | 1.676595000  | 0.910218000  |
| 6  | 10.790814000  | 3.087402000  | 1.270225000  |
| 1  | 10.403660000  | 3.726006000  | 0.473832000  |
| 1  | 10.241962000  | 3.310548000  | 2.187276000  |
| 1  | 11.856113000  | 3.251242000  | 1.410603000  |
| 6  | -10.966336000 | 0.062566000  | 0.558319000  |
| 6  | -11.177550000 | -1.241001000 | 1.110568000  |
| 6  | -12.111117000 | 0.907592000  | 0.383927000  |
| 6  | -12.422750000 | -1.676892000 | 1.463128000  |
| 1  | -10.324674000 | -1.900372000 | 1.246897000  |
| 6  | -13.364319000 | 0.491649000  | 0.729649000  |
| 1  | -11.976215000 | 1.902535000  | -0.027206000 |
| 6  | -13.602890000 | -0.833691000 | 1.294347000  |
| 1  | -12.581572000 | -2.666408000 | 1.879418000  |
| 1  | -14.230692000 | 1.132197000  | 0.599482000  |
| 8  | -14.743326000 | -1.221680000 | 1.612506000  |

**S2TIIDTS6-OS** E=-3253.473747 Hartree

|   |              |              |              |
|---|--------------|--------------|--------------|
| 6 | -1.239460000 | 1.688537000  | -0.610541000 |
| 6 | -0.643164000 | 0.391746000  | -0.544492000 |
| 6 | -1.506467000 | -0.699725000 | -0.330736000 |
| 6 | -2.872497000 | -0.494971000 | -0.218256000 |
| 6 | -3.456404000 | 0.794386000  | -0.310908000 |
| 6 | -2.595102000 | 1.907117000  | -0.507470000 |
| 6 | 1.006798000  | 2.062200000  | -0.778006000 |
| 6 | 0.796825000  | 0.564322000  | -0.643863000 |
| 1 | -1.103911000 | -1.698846000 | -0.276071000 |
| 1 | -3.510705000 | -1.358145000 | -0.062548000 |

|    |               |              |              |
|----|---------------|--------------|--------------|
| 1  | -2.990863000  | 2.913340000  | -0.564034000 |
| 6  | 1.841222000   | -0.349843000 | -0.666246000 |
| 6  | 3.281826000   | -0.184526000 | -0.546625000 |
| 6  | 1.632881000   | -1.838330000 | -0.888699000 |
| 6  | 3.876660000   | -1.473838000 | -0.682491000 |
| 6  | 4.143112000   | 0.890214000  | -0.262488000 |
| 6  | 5.233621000   | -1.699745000 | -0.576369000 |
| 6  | 5.510316000   | 0.676801000  | -0.150128000 |
| 1  | 3.741212000   | 1.885734000  | -0.157722000 |
| 6  | 6.088319000   | -0.602296000 | -0.310563000 |
| 1  | 5.630379000   | -2.703729000 | -0.665129000 |
| 1  | 6.150932000   | 1.531121000  | 0.043144000  |
| 8  | 0.600610000   | -2.466005000 | -1.076680000 |
| 8  | 2.040714000   | 2.699905000  | -0.918117000 |
| 7  | 2.888453000   | -2.425012000 | -0.900386000 |
| 7  | -0.248883000  | 2.648867000  | -0.768769000 |
| 6  | -0.458444000  | 4.075637000  | -0.898574000 |
| 1  | -1.071728000  | 4.300715000  | -1.777589000 |
| 1  | -0.949168000  | 4.481783000  | -0.007317000 |
| 1  | 0.521831000   | 4.538127000  | -1.014040000 |
| 6  | 3.099233000   | -3.842182000 | -1.108936000 |
| 1  | 3.722317000   | -4.017241000 | -1.992459000 |
| 1  | 3.579583000   | -4.299269000 | -0.236888000 |
| 1  | 2.120257000   | -4.296591000 | -1.261723000 |
| 6  | -4.879814000  | 0.981547000  | -0.203721000 |
| 6  | -5.597066000  | 2.186736000  | -0.313343000 |
| 16 | -5.975018000  | -0.365556000 | 0.098956000  |
| 6  | -6.962993000  | 2.046296000  | -0.163473000 |
| 1  | -5.126844000  | 3.143551000  | -0.504208000 |
| 6  | -7.382554000  | 0.704767000  | 0.074741000  |
| 1  | -7.682867000  | 2.848585000  | -0.215678000 |
| 6  | 7.520604000   | -0.806627000 | -0.205040000 |
| 6  | 8.262589000   | -1.927130000 | -0.569397000 |
| 16 | 8.586114000   | 0.425199000  | 0.445820000  |
| 6  | 9.637852000   | -1.802651000 | -0.342793000 |
| 1  | 7.816691000   | -2.807486000 | -1.015860000 |
| 6  | 10.017457000  | -0.575086000 | 0.210294000  |
| 1  | 10.347292000  | -2.582715000 | -0.588420000 |
| 6  | -8.693616000  | 0.237817000  | 0.268954000  |
| 6  | -9.833220000  | 1.154713000  | 0.245184000  |
| 6  | -8.910272000  | -1.183748000 | 0.496774000  |
| 6  | -11.339612000 | -0.778917000 | 0.667596000  |
| 8  | -7.983796000  | -1.995317000 | 0.528232000  |
| 7  | -10.235727000 | -1.614186000 | 0.683455000  |

|    |               |              |              |
|----|---------------|--------------|--------------|
| 6  | -10.438523000 | -3.054144000 | 0.910329000  |
| 1  | -11.086021000 | -3.462557000 | 0.133314000  |
| 1  | -9.459281000  | -3.523538000 | 0.884064000  |
| 1  | -10.918742000 | -3.211633000 | 1.877008000  |
| 7  | -11.105674000 | 0.567675000  | 0.451519000  |
| 6  | -12.259141000 | 1.482176000  | 0.429858000  |
| 1  | -12.950757000 | 1.185364000  | -0.359789000 |
| 1  | -12.785706000 | 1.434562000  | 1.384002000  |
| 1  | -11.872902000 | 2.481046000  | 0.250444000  |
| 8  | -9.748298000  | 2.366064000  | 0.062147000  |
| 16 | -12.886673000 | -1.375817000 | 0.900225000  |
| 6  | 11.328489000  | -0.121957000 | 0.563459000  |
| 6  | 11.554143000  | 1.195167000  | 1.077216000  |
| 6  | 12.464701000  | -0.983365000 | 0.412511000  |
| 6  | 12.804086000  | 1.628268000  | 1.415340000  |
| 1  | 10.708180000  | 1.866827000  | 1.195574000  |
| 6  | 13.722424000  | -0.570417000 | 0.744384000  |
| 1  | 12.319160000  | -1.988331000 | 0.030366000  |
| 6  | 13.975599000  | 0.768456000  | 1.269915000  |
| 1  | 12.973607000  | 2.627811000  | 1.802464000  |
| 1  | 14.582030000  | -1.223309000 | 0.631770000  |
| 8  | 15.120223000  | 1.153823000  | 1.575191000  |

**S2TIIDTS7-OS** E=-3007.404330 Hartree

|   |              |              |              |
|---|--------------|--------------|--------------|
| 6 | 1.064227000  | -1.730858000 | -0.917866000 |
| 6 | 0.480572000  | -0.434758000 | -0.788613000 |
| 6 | 1.357573000  | 0.645514000  | -0.584682000 |
| 6 | 2.728122000  | 0.431297000  | -0.536617000 |
| 6 | 3.293856000  | -0.856444000 | -0.687900000 |
| 6 | 2.423233000  | -1.959328000 | -0.878435000 |
| 6 | -1.188939000 | -2.092845000 | -0.992640000 |
| 6 | -0.967263000 | -0.599264000 | -0.828927000 |
| 1 | 0.964647000  | 1.645601000  | -0.492628000 |
| 1 | 3.380942000  | 1.289072000  | -0.412451000 |
| 1 | 2.813126000  | -2.966659000 | -0.958097000 |
| 6 | -2.006524000 | 0.316545000  | -0.780760000 |
| 6 | -3.445241000 | 0.152457000  | -0.616251000 |
| 6 | -1.800035000 | 1.812900000  | -0.955691000 |
| 6 | -4.037123000 | 1.447564000  | -0.687091000 |
| 6 | -4.301841000 | -0.927277000 | -0.340256000 |
| 6 | -5.388823000 | 1.675566000  | -0.526990000 |
| 6 | -5.664045000 | -0.712257000 | -0.174133000 |
| 1 | -3.902169000 | -1.927409000 | -0.282916000 |

|    |               |              |              |
|----|---------------|--------------|--------------|
| 6  | -6.239494000  | 0.573446000  | -0.270637000 |
| 1  | -5.783097000  | 2.683720000  | -0.566037000 |
| 1  | -6.302569000  | -1.570155000 | 0.009995000  |
| 8  | -0.772363000  | 2.444557000  | -1.153131000 |
| 8  | -2.230047000  | -2.724661000 | -1.102720000 |
| 7  | -3.052531000  | 2.402749000  | -0.904825000 |
| 7  | 0.063269000   | -2.683423000 | -1.054518000 |
| 6  | 0.260630000   | -4.106856000 | -1.231728000 |
| 1  | 0.834806000   | -4.309696000 | -2.141997000 |
| 1  | 0.787193000   | -4.538872000 | -0.373698000 |
| 1  | -0.725746000  | -4.562743000 | -1.317510000 |
| 6  | -3.264166000  | 3.827328000  | -1.054750000 |
| 1  | -3.916462000  | 4.035860000  | -1.909409000 |
| 1  | -3.712406000  | 4.253896000  | -0.150749000 |
| 1  | -2.289139000  | 4.284074000  | -1.224699000 |
| 6  | 4.722797000   | -1.062589000 | -0.643726000 |
| 6  | 5.445202000   | -2.198295000 | -1.039015000 |
| 16 | 5.813962000   | 0.174039000  | -0.056138000 |
| 6  | 6.817086000   | -2.085289000 | -0.875965000 |
| 1  | 4.970894000   | -3.074171000 | -1.464119000 |
| 6  | 7.232141000   | -0.833740000 | -0.350117000 |
| 1  | 7.538233000   | -2.853417000 | -1.115695000 |
| 6  | -7.667414000  | 0.780915000  | -0.110116000 |
| 6  | -8.417424000  | 1.908166000  | -0.431528000 |
| 16 | -8.712074000  | -0.456715000 | 0.561966000  |
| 6  | -9.784769000  | 1.784248000  | -0.156822000 |
| 1  | -7.984728000  | 2.792687000  | -0.882819000 |
| 6  | -10.147697000 | 0.550590000  | 0.392215000  |
| 1  | -10.500121000 | 2.569481000  | -0.366216000 |
| 6  | 8.545952000   | -0.505292000 | 0.027179000  |
| 6  | 9.559641000   | -1.585039000 | 0.279533000  |
| 6  | 9.134625000   | 0.747608000  | 0.450708000  |
| 6  | 10.643823000  | -0.947162000 | 1.063449000  |
| 6  | 10.374187000  | 0.425030000  | 1.214229000  |
| 6  | 11.766847000  | -1.551310000 | 1.610312000  |
| 6  | 11.253978000  | 1.215484000  | 1.957687000  |
| 6  | 12.643874000  | -0.756737000 | 2.352821000  |
| 1  | 11.938706000  | -2.611904000 | 1.457512000  |
| 6  | 12.380201000  | 0.606411000  | 2.524641000  |
| 1  | 11.085226000  | 2.272427000  | 2.112284000  |
| 1  | 13.529991000  | -1.195135000 | 2.801222000  |
| 1  | 13.063827000  | 1.212976000  | 3.110752000  |
| 8  | 9.508248000   | -2.761807000 | -0.048066000 |
| 6  | 8.748406000   | 2.033463000  | 0.089337000  |

|   |               |              |              |
|---|---------------|--------------|--------------|
| 6 | 7.823206000   | 2.325993000  | -0.957136000 |
| 7 | 7.120629000   | 2.625657000  | -1.837223000 |
| 6 | 9.358350000   | 3.204332000  | 0.634159000  |
| 7 | 9.819722000   | 4.180914000  | 1.072141000  |
| 6 | -11.447103000 | 0.095515000  | 0.786861000  |
| 6 | -11.658061000 | -1.228448000 | 1.288231000  |
| 6 | -12.584769000 | 0.962403000  | 0.691288000  |
| 6 | -12.896349000 | -1.663086000 | 1.665918000  |
| 1 | -10.810710000 | -1.904423000 | 1.364710000  |
| 6 | -13.831005000 | 0.548079000  | 1.063249000  |
| 1 | -12.449858000 | 1.972720000  | 0.319475000  |
| 6 | -14.069148000 | -0.797759000 | 1.577240000  |
| 1 | -13.054882000 | -2.668011000 | 2.043667000  |
| 1 | -14.691841000 | 1.205232000  | 0.992543000  |
| 8 | -15.203275000 | -1.184456000 | 1.918993000  |

**S2TIIDTS8-OS** E=-3442.624511 Hartree

|   |              |              |              |
|---|--------------|--------------|--------------|
| 6 | -4.508449000 | 1.505206000  | -0.644660000 |
| 6 | -3.898112000 | 0.217387000  | -0.614447000 |
| 6 | -4.738612000 | -0.882618000 | -0.371606000 |
| 6 | -6.103762000 | -0.692563000 | -0.198205000 |
| 6 | -6.697422000 | 0.586989000  | -0.254532000 |
| 6 | -5.863156000 | 1.708697000  | -0.476837000 |
| 6 | -2.277513000 | 1.912532000  | -0.902503000 |
| 6 | -2.461578000 | 0.407326000  | -0.775054000 |
| 1 | -4.324518000 | -1.878121000 | -0.345172000 |
| 1 | -6.729789000 | -1.564851000 | -0.040847000 |
| 1 | -6.272134000 | 2.711707000  | -0.483688000 |
| 6 | -1.409833000 | -0.490356000 | -0.854006000 |
| 6 | 0.037334000  | -0.305284000 | -0.815591000 |
| 6 | -1.609556000 | -1.981973000 | -1.059526000 |
| 6 | 0.638124000  | -1.588065000 | -0.986597000 |
| 6 | 0.898498000  | 0.781017000  | -0.583844000 |
| 6 | 2.001365000  | -1.797381000 | -0.961211000 |
| 6 | 2.273164000  | 0.585804000  | -0.549783000 |
| 1 | 0.491422000  | 1.771914000  | -0.460097000 |
| 6 | 2.854401000  | -0.687787000 | -0.742614000 |
| 1 | 2.406976000  | -2.795944000 | -1.068955000 |
| 1 | 2.914739000  | 1.449175000  | -0.406871000 |
| 8 | -2.641380000 | -2.626332000 | -1.181764000 |
| 8 | -1.259360000 | 2.564996000  | -1.079550000 |

|    |               |              |              |
|----|---------------|--------------|--------------|
| 7  | -0.348822000  | -2.551120000 | -1.145552000 |
| 7  | -3.538158000  | 2.481404000  | -0.832798000 |
| 6  | -3.771416000  | 3.906822000  | -0.937277000 |
| 1  | -4.427860000  | 4.132227000  | -1.784386000 |
| 1  | -4.224922000  | 4.297446000  | -0.019802000 |
| 1  | -2.803706000  | 4.383560000  | -1.093391000 |
| 6  | -0.130655000  | -3.966145000 | -1.363632000 |
| 1  | 0.441235000   | -4.134311000 | -2.282296000 |
| 1  | 0.407305000   | -4.413479000 | -0.520759000 |
| 1  | -1.110355000  | -4.434674000 | -1.456957000 |
| 6  | -8.128358000  | 0.769115000  | -0.087015000 |
| 6  | -8.895434000  | 1.891958000  | -0.381390000 |
| 16 | -9.152591000  | -0.499155000 | 0.558041000  |
| 6  | -10.260457000 | 1.741062000  | -0.107479000 |
| 1  | -8.476832000  | 2.792732000  | -0.813440000 |
| 6  | -10.603362000 | 0.489941000  | 0.413661000  |
| 1  | -10.988025000 | 2.519876000  | -0.297831000 |
| 6  | 4.288881000   | -0.875753000 | -0.713446000 |
| 6  | 5.025281000   | -1.964912000 | -1.195222000 |
| 16 | 5.356405000   | 0.325724000  | -0.024328000 |
| 6  | 6.397128000   | -1.840410000 | -1.021118000 |
| 1  | 4.565171000   | -2.808246000 | -1.694469000 |
| 6  | 6.786133000   | -0.631937000 | -0.399090000 |
| 1  | 7.121410000   | -2.569559000 | -1.362497000 |
| 6  | 8.094534000   | -0.314299000 | 0.006823000  |
| 6  | 8.734622000   | 0.891323000  | 0.403740000  |
| 6  | 10.366817000  | -0.720750000 | 1.181127000  |
| 6  | 9.979018000   | 0.627817000  | 1.186370000  |
| 6  | 11.510942000  | -1.198833000 | 1.799844000  |
| 6  | 10.798144000  | 1.529788000  | 1.881136000  |
| 6  | 12.313761000  | -0.282474000 | 2.481398000  |
| 1  | 11.764358000  | -2.252840000 | 1.758209000  |
| 6  | 11.949235000  | 1.065319000  | 2.520843000  |
| 1  | 10.552948000  | 2.580204000  | 1.941076000  |
| 1  | 13.214784000  | -0.619571000 | 2.983438000  |
| 1  | 12.569851000  | 1.774191000  | 3.059661000  |
| 6  | 8.324407000   | 2.172741000  | -0.005702000 |
| 6  | 8.856602000   | 3.386175000  | 0.515464000  |
| 7  | 9.245119000   | 4.407545000  | 0.923947000  |
| 6  | 7.422195000   | 2.391377000  | -1.086095000 |
| 7  | 6.727184000   | 2.628873000  | -1.991742000 |
| 16 | 9.197001000   | -1.731390000 | 0.301368000  |
| 8  | 8.564186000   | -2.691996000 | 1.216972000  |
| 8  | 9.749875000   | -2.229018000 | -0.969139000 |



|   |               |              |             |
|---|---------------|--------------|-------------|
| 6 | -11.895230000 | 0.006156000  | 0.800205000 |
| 6 | -12.085052000 | -1.332330000 | 1.270268000 |
| 6 | -13.045628000 | 0.858203000  | 0.727653000 |
| 6 | -13.315859000 | -1.794241000 | 1.640135000 |
| 1 | -11.227612000 | -1.997258000 | 1.328780000 |
| 6 | -14.284717000 | 0.416661000  | 1.092281000 |
| 1 | -12.926573000 | 1.878965000  | 0.379793000 |
| 6 | -14.501409000 | -0.944435000 | 1.574515000 |
| 1 | -13.458625000 | -2.810089000 | 1.994166000 |
| 1 | -15.155398000 | 1.062372000  | 1.039130000 |
| 8 | -15.628852000 | -1.355954000 | 1.909359000 |

**S2TIIDTS9-OS** E=-3428.565678 Hartree

|   |              |              |              |
|---|--------------|--------------|--------------|
| 6 | -3.637096000 | -1.497988000 | 0.653015000  |
| 6 | -3.042527000 | -0.206062000 | 0.539796000  |
| 6 | -3.906608000 | 0.871206000  | 0.275265000  |
| 6 | -5.273851000 | 0.657595000  | 0.158691000  |
| 6 | -5.851249000 | -0.624452000 | 0.295708000  |
| 6 | -4.993747000 | -1.724382000 | 0.542638000  |
| 6 | -1.389923000 | -1.857331000 | 0.851968000  |
| 6 | -1.601264000 | -0.372520000 | 0.657483000  |
| 1 | -3.506702000 | 1.869430000  | 0.189373000  |
| 1 | -5.915693000 | 1.514557000  | -0.019394000 |
| 1 | -5.388433000 | -2.730786000 | 0.614161000  |
| 6 | -0.556340000 | 0.547062000  | 0.649010000  |
| 6 | 0.879598000  | 0.382146000  | 0.541582000  |
| 6 | -0.771257000 | 2.039530000  | 0.811691000  |
| 6 | 1.475837000  | 1.678233000  | 0.623638000  |
| 6 | 1.749461000  | -0.702328000 | 0.311831000  |
| 6 | 2.829421000  | 1.903874000  | 0.516524000  |
| 6 | 3.113494000  | -0.490888000 | 0.196570000  |
| 1 | 1.349562000  | -1.702277000 | 0.247024000  |
| 6 | 3.696025000  | 0.797610000  | 0.301515000  |
| 1 | 3.220618000  | 2.911525000  | 0.585918000  |
| 1 | 3.753291000  | -1.351419000 | 0.027586000  |
| 8 | -1.805673000 | 2.673947000  | 0.971688000  |
| 8 | -0.357373000 | -2.492586000 | 1.026757000  |
| 7 | 0.482500000  | 2.633032000  | 0.801551000  |
| 7 | -2.646203000 | -2.449219000 | 0.854079000  |
| 6 | -2.851566000 | -3.869306000 | 1.036166000  |
| 1 | -3.473813000 | -4.064778000 | 1.916434000  |
| 1 | -3.331156000 | -4.313540000 | 0.156610000  |
| 1 | -1.870168000 | -4.321870000 | 1.179869000  |

|    |               |              |              |
|----|---------------|--------------|--------------|
| 6  | 0.685314000   | 4.057068000  | 0.953333000  |
| 1  | 1.303482000   | 4.272565000  | 1.831791000  |
| 1  | 1.168276000   | 4.482040000  | 0.066189000  |
| 1  | -0.297054000  | 4.511799000  | 1.082820000  |
| 6  | -7.282390000  | -0.829319000 | 0.186034000  |
| 6  | -8.023590000  | -1.958847000 | 0.523823000  |
| 16 | -8.352089000  | 0.415132000  | -0.437119000 |
| 6  | -9.399001000  | -1.832195000 | 0.299916000  |
| 1  | -7.575650000  | -2.848389000 | 0.949691000  |
| 6  | -9.782847000  | -0.593159000 | -0.224574000 |
| 1  | -10.106741000 | -2.619456000 | 0.527336000  |
| 6  | 5.115241000   | 0.994978000  | 0.191687000  |
| 6  | 5.844669000   | 2.188949000  | 0.294387000  |
| 16 | 6.221547000   | -0.350070000 | -0.111983000 |
| 6  | 7.216255000   | 2.051712000  | 0.140750000  |
| 1  | 5.371455000   | 3.144746000  | 0.483154000  |
| 6  | 7.634962000   | 0.718980000  | -0.093702000 |
| 1  | 7.912873000   | 2.880344000  | 0.194980000  |
| 6  | 8.925764000   | 0.250326000  | -0.286862000 |
| 16 | 9.299270000   | -1.449892000 | -0.568119000 |
| 16 | 10.325910000  | 1.329320000  | -0.267959000 |
| 6  | 11.049845000  | -1.238100000 | -0.704428000 |
| 6  | 11.533314000  | 0.071499000  | -0.562807000 |
| 6  | 11.933230000  | -2.294274000 | -0.940060000 |
| 6  | 12.902964000  | 0.330368000  | -0.656284000 |
| 6  | 13.299023000  | -2.031168000 | -1.032610000 |
| 1  | 11.558219000  | -3.306855000 | -1.049337000 |
| 6  | 13.780880000  | -0.726601000 | -0.891534000 |
| 1  | 13.277000000  | 1.343291000  | -0.546699000 |
| 1  | 13.988801000  | -2.848652000 | -1.215537000 |
| 1  | 14.845497000  | -0.529565000 | -0.964775000 |
| 6  | -11.094168000 | -0.135249000 | -0.566180000 |
| 6  | -11.324799000 | 1.191744000  | -1.051111000 |
| 6  | -12.229660000 | -1.000510000 | -0.433541000 |
| 6  | -12.576216000 | 1.629374000  | -1.378739000 |
| 1  | -10.480427000 | 1.867843000  | -1.155882000 |
| 6  | -13.488611000 | -0.582856000 | -0.755400000 |
| 1  | -12.082312000 | -2.013384000 | -0.073041000 |
| 6  | -13.746612000 | 0.765820000  | -1.251728000 |
| 1  | -12.747137000 | 2.637029000  | -1.743924000 |
| 1  | -14.346358000 | -1.240492000 | -0.655740000 |
| 8  | -14.892901000 | 1.155457000  | -1.547934000 |

S2TIIDTS10-OS E=-3274.907139 Hartree

|    |              |              |              |
|----|--------------|--------------|--------------|
| 6  | -2.542696000 | -1.493530000 | 0.592136000  |
| 6  | -1.914096000 | -0.218118000 | 0.450346000  |
| 6  | -2.753587000 | 0.871627000  | 0.145237000  |
| 6  | -4.120148000 | 0.685526000  | 0.016184000  |
| 6  | -4.735172000 | -0.581338000 | 0.180606000  |
| 6  | -3.899269000 | -1.693567000 | 0.472171000  |
| 6  | -0.308599000 | -1.895552000 | 0.842240000  |
| 6  | -0.484587000 | -0.409851000 | 0.593765000  |
| 1  | -2.328723000 | 1.856993000  | 0.033120000  |
| 1  | -4.735949000 | 1.549927000  | -0.211990000 |
| 1  | -4.315722000 | -2.686538000 | 0.589734000  |
| 6  | 0.581896000  | 0.484398000  | 0.571479000  |
| 6  | 2.020710000  | 0.278399000  | 0.491014000  |
| 6  | 0.402981000  | 1.982135000  | 0.679323000  |
| 6  | 2.644118000  | 1.560543000  | 0.544195000  |
| 6  | 2.863245000  | -0.831491000 | 0.303014000  |
| 6  | 4.007604000  | 1.749130000  | 0.447701000  |
| 6  | 4.237144000  | -0.656269000 | 0.201160000  |
| 1  | 2.441087000  | -1.823486000 | 0.264654000  |
| 6  | 4.842668000  | 0.617737000  | 0.278353000  |
| 1  | 4.425100000  | 2.748594000  | 0.470840000  |
| 1  | 4.861313000  | -1.536377000 | 0.083264000  |
| 8  | -0.616892000 | 2.650006000  | 0.798439000  |
| 8  | 0.707206000  | -2.543934000 | 1.056483000  |
| 7  | 1.672950000  | 2.544086000  | 0.673104000  |
| 7  | -1.575899000 | -2.459692000 | 0.840878000  |
| 6  | -1.815465000 | -3.868043000 | 1.066995000  |
| 1  | -2.453787000 | -4.020270000 | 1.944293000  |
| 1  | -2.293009000 | -4.330366000 | 0.195730000  |
| 1  | -0.846671000 | -4.337342000 | 1.239613000  |
| 6  | 1.909181000  | 3.966982000  | 0.780260000  |
| 1  | 2.519940000  | 4.196887000  | 1.660263000  |
| 1  | 2.415212000  | 4.350279000  | -0.113047000 |
| 1  | 0.936535000  | 4.449378000  | 0.879590000  |
| 6  | -6.156800000 | -0.751972000 | 0.055173000  |
| 6  | -6.916540000 | -1.920744000 | 0.206341000  |
| 16 | -7.225564000 | 0.600516000  | -0.338799000 |
| 6  | -8.282355000 | -1.759503000 | 0.020006000  |
| 1  | -6.470254000 | -2.876276000 | 0.453187000  |
| 6  | -8.663754000 | -0.432646000 | -0.291148000 |
| 1  | -8.999669000 | -2.567837000 | 0.104185000  |
| 6  | 6.280068000  | 0.783283000  | 0.185075000  |
| 6  | 7.042252000  | 1.911379000  | 0.477791000  |

|    |               |              |              |
|----|---------------|--------------|--------------|
| 16 | 7.330137000   | -0.516409000 | -0.352846000 |
| 6  | 8.417944000   | 1.741353000  | 0.286519000  |
| 1  | 6.608465000   | 2.831920000  | 0.848920000  |
| 6  | 8.780906000   | 0.468135000  | -0.165967000 |
| 1  | 9.140406000   | 2.522754000  | 0.486164000  |
| 6  | -9.939861000  | 0.057395000  | -0.532992000 |
| 16 | -10.278209000 | 1.749765000  | -0.911109000 |
| 16 | -11.378046000 | -0.974306000 | -0.486945000 |
| 6  | -12.015243000 | 1.540177000  | -1.061957000 |
| 6  | -12.511022000 | 0.310846000  | -0.870414000 |
| 1  | -13.559351000 | 0.046877000  | -0.934001000 |
| 1  | -12.603062000 | 2.416992000  | -1.303224000 |
| 6  | 10.086568000  | -0.037152000 | -0.459108000 |
| 6  | 10.293541000  | -1.392169000 | -0.871810000 |
| 6  | 11.240200000  | 0.807037000  | -0.349145000 |
| 6  | 11.539565000  | -1.874918000 | -1.153457000 |
| 1  | 9.435041000   | -2.052917000 | -0.958093000 |
| 6  | 12.494126000  | 0.344320000  | -0.625852000 |
| 1  | 11.111155000  | 1.840110000  | -0.043047000 |
| 6  | 12.728097000  | -1.033506000 | -1.048476000 |
| 1  | 11.692413000  | -2.903586000 | -1.463975000 |
| 1  | 13.365653000  | 0.986038000  | -0.543470000 |
| 8  | 13.869649000  | -1.464296000 | -1.303163000 |

**S2TIIDTS1-T1** E=-2586.807293 Hartree

|   |              |              |              |
|---|--------------|--------------|--------------|
| 6 | -1.912305000 | 1.561792000  | -0.512696000 |
| 6 | -1.274609000 | 0.290530000  | -0.463192000 |
| 6 | -2.101198000 | -0.834364000 | -0.317490000 |
| 6 | -3.482857000 | -0.682195000 | -0.253864000 |
| 6 | -4.100098000 | 0.582293000  | -0.326811000 |
| 6 | -3.282401000 | 1.728580000  | -0.450717000 |
| 6 | 0.320258000  | 2.035220000  | -0.576458000 |
| 6 | 0.169982000  | 0.521536000  | -0.501025000 |
| 1 | -1.664845000 | -1.819846000 | -0.280075000 |
| 1 | -4.097894000 | -1.572666000 | -0.174459000 |
| 1 | -3.717805000 | 2.720556000  | -0.462045000 |
| 6 | 1.247183000  | -0.342762000 | -0.514395000 |
| 6 | 2.687154000  | -0.118237000 | -0.369663000 |
| 6 | 1.107222000  | -1.837068000 | -0.750510000 |
| 6 | 3.332928000  | -1.380175000 | -0.513359000 |
| 6 | 3.498877000  | 0.984707000  | -0.062490000 |
| 6 | 4.697103000  | -1.554153000 | -0.395707000 |
| 6 | 4.874321000  | 0.825175000  | 0.063814000  |

|    |               |              |              |
|----|---------------|--------------|--------------|
| 1  | 3.056943000   | 1.961516000  | 0.052799000  |
| 6  | 5.504128000   | -0.426747000 | -0.106174000 |
| 1  | 5.133019000   | -2.540549000 | -0.495523000 |
| 1  | 5.475239000   | 1.703281000  | 0.277532000  |
| 8  | 0.106876000   | -2.510362000 | -0.951786000 |
| 8  | 1.330703000   | 2.718919000  | -0.653742000 |
| 7  | 2.387165000   | -2.368101000 | -0.754540000 |
| 7  | -0.956472000  | 2.567887000  | -0.596383000 |
| 6  | -1.221471000  | 3.988984000  | -0.683079000 |
| 1  | -1.814344000  | 4.219902000  | -1.574413000 |
| 1  | -1.758460000  | 4.341561000  | 0.204205000  |
| 1  | -0.258660000  | 4.495743000  | -0.748047000 |
| 6  | 2.660638000   | -3.773396000 | -0.971887000 |
| 1  | 3.300481000   | -3.914044000 | -1.849535000 |
| 1  | 3.150272000   | -4.216553000 | -0.097826000 |
| 1  | 1.703790000   | -4.267778000 | -1.139434000 |
| 6  | -5.549165000  | 0.728341000  | -0.275456000 |
| 6  | -6.319990000  | 1.806899000  | -0.685346000 |
| 16 | -6.579364000  | -0.536159000 | 0.362437000  |
| 6  | -7.700492000  | 1.625266000  | -0.502924000 |
| 1  | -5.894471000  | 2.694500000  | -1.137852000 |
| 6  | -8.042796000  | 0.395156000  | 0.058218000  |
| 1  | -8.434347000  | 2.367615000  | -0.790422000 |
| 6  | 6.940553000   | -0.572541000 | 0.013779000  |
| 6  | 7.730000000   | -1.675628000 | -0.331761000 |
| 16 | 7.947592000   | 0.718339000  | 0.658176000  |
| 6  | 9.090735000   | -1.502125000 | -0.099650000 |
| 1  | 7.316979000   | -2.577930000 | -0.765248000 |
| 6  | 9.405508000   | -0.239577000 | 0.444264000  |
| 1  | 9.852715000   | -2.241762000 | -0.313872000 |
| 6  | 10.682410000  | 0.241965000  | 0.791662000  |
| 6  | 11.824303000  | -0.582006000 | 0.607275000  |
| 7  | 12.745534000  | -1.279242000 | 0.445313000  |
| 6  | 10.870265000  | 1.541339000  | 1.328177000  |
| 7  | 11.000414000  | 2.614356000  | 1.768266000  |
| 6  | -9.348296000  | -0.113936000 | 0.377111000  |
| 6  | -10.512075000 | 0.699620000  | 0.193207000  |
| 6  | -9.532377000  | -1.437320000 | 0.885728000  |
| 6  | -11.761901000 | 0.234885000  | 0.490360000  |
| 1  | -10.396894000 | 1.710311000  | -0.184161000 |
| 6  | -10.773704000 | -1.922202000 | 1.189713000  |
| 1  | -8.663381000  | -2.074076000 | 1.027499000  |
| 6  | -11.973387000 | -1.111974000 | 1.009852000  |
| 1  | -12.643959000 | 0.852207000  | 0.353406000  |

|   |               |              |             |
|---|---------------|--------------|-------------|
| 1 | -10.912363000 | -2.927903000 | 1.573129000 |
| 8 | -13.110934000 | -1.544625000 | 1.283641000 |

**S2TIIDTS3- T1** E=-3154.665448 Hartree

|    |              |              |              |
|----|--------------|--------------|--------------|
| 6  | -1.525417000 | -1.502418000 | 0.221601000  |
| 6  | -0.917536000 | -0.220383000 | 0.109270000  |
| 6  | -1.767861000 | 0.872928000  | -0.111359000 |
| 6  | -3.144699000 | 0.682734000  | -0.191278000 |
| 6  | -3.731864000 | -0.589767000 | -0.054388000 |
| 6  | -2.890986000 | -1.705725000 | 0.155143000  |
| 6  | 0.716366000  | -1.912306000 | 0.371268000  |
| 6  | 0.533933000  | -0.413640000 | 0.196105000  |
| 1  | -1.354284000 | 1.863875000  | -0.208944000 |
| 1  | -3.774580000 | 1.545012000  | -0.385419000 |
| 1  | -3.306935000 | -2.697548000 | 0.285797000  |
| 6  | 1.589897000  | 0.475956000  | 0.176791000  |
| 6  | 3.038809000  | 0.281917000  | 0.091970000  |
| 6  | 1.406508000  | 1.983391000  | 0.295414000  |
| 6  | 3.646670000  | 1.567431000  | 0.150069000  |
| 6  | 3.890965000  | -0.818854000 | -0.087898000 |
| 6  | 5.010650000  | 1.769691000  | 0.068350000  |
| 6  | 5.266158000  | -0.630086000 | -0.182628000 |
| 1  | 3.478451000  | -1.813561000 | -0.142675000 |
| 6  | 5.854264000  | 0.647881000  | -0.101103000 |
| 1  | 5.424899000  | 2.766960000  | 0.154770000  |
| 1  | 5.896772000  | -1.498774000 | -0.341568000 |
| 8  | 0.383615000  | 2.641871000  | 0.417710000  |
| 8  | 1.737866000  | -2.569170000 | 0.512473000  |
| 7  | 2.669962000  | 2.546639000  | 0.291383000  |
| 7  | -0.549531000 | -2.474691000 | 0.396984000  |
| 6  | -0.782556000 | -3.893215000 | 0.570609000  |
| 1  | -1.382605000 | -4.082626000 | 1.467018000  |
| 1  | -1.297952000 | -4.314053000 | -0.299657000 |
| 1  | 0.191055000  | -4.370802000 | 0.680253000  |
| 6  | 2.903561000  | 3.970857000  | 0.408876000  |
| 1  | 3.508899000  | 4.194284000  | 1.293777000  |
| 1  | 3.414276000  | 4.357421000  | -0.479787000 |
| 1  | 1.930754000  | 4.452831000  | 0.505562000  |
| 6  | -5.175313000 | -0.775113000 | -0.131812000 |
| 6  | -5.882014000 | -1.940949000 | -0.394216000 |
| 16 | -6.282619000 | 0.559088000  | 0.121458000  |
| 6  | -7.276352000 | -1.774268000 | -0.405826000 |

|    |               |              |              |
|----|---------------|--------------|--------------|
| 1  | -5.396599000  | -2.885784000 | -0.605091000 |
| 6  | -7.684876000  | -0.468423000 | -0.148454000 |
| 1  | -7.975202000  | -2.577620000 | -0.609601000 |
| 6  | 7.296138000   | 0.831299000  | -0.193691000 |
| 6  | 8.000941000   | 1.995171000  | -0.470029000 |
| 16 | 8.410124000   | -0.497939000 | 0.052808000  |
| 6  | 9.394251000   | 1.828385000  | -0.493938000 |
| 1  | 7.515423000   | 2.940277000  | -0.681247000 |
| 6  | 9.815859000   | 0.523944000  | -0.233361000 |
| 1  | 10.079616000  | 2.637493000  | -0.712764000 |
| 6  | -9.009606000  | 0.048759000  | -0.086546000 |
| 6  | -9.418659000  | 1.377640000  | 0.134512000  |
| 16 | -10.436500000 | -0.947165000 | -0.287521000 |
| 1  | -8.721426000  | 2.195194000  | 0.287858000  |
| 6  | -11.436981000 | 0.508029000  | -0.059256000 |
| 6  | -12.840772000 | 0.467121000  | -0.097655000 |
| 6  | -13.526629000 | -0.753917000 | -0.324686000 |
| 7  | -14.064372000 | -1.772126000 | -0.513319000 |
| 6  | -13.604897000 | 1.648946000  | 0.090384000  |
| 7  | -14.260383000 | 2.601177000  | 0.240890000  |
| 7  | -10.726491000 | 1.625601000  | 0.149229000  |
| 6  | 11.154862000  | 0.007818000  | -0.180412000 |
| 6  | 11.414216000  | -1.381506000 | 0.037510000  |
| 6  | 12.279014000  | 0.879801000  | -0.344978000 |
| 6  | 12.688178000  | -1.873547000 | 0.088450000  |
| 1  | 10.576000000  | -2.062072000 | 0.159817000  |
| 6  | 13.560337000  | 0.409016000  | -0.297869000 |
| 1  | 12.107854000  | 1.939267000  | -0.504391000 |
| 6  | 13.848349000  | -1.004408000 | -0.077348000 |
| 1  | 12.883457000  | -2.928522000 | 0.251458000  |
| 1  | 14.412330000  | 1.070057000  | -0.420366000 |
| 8  | 15.015015000  | -1.442999000 | -0.033237000 |

**S2TIIDTS4-T1** E=-3120.688433 Hartree

|   |              |              |              |
|---|--------------|--------------|--------------|
| 6 | -2.022283000 | 1.630913000  | -0.608946000 |
| 6 | -1.415677000 | 0.343531000  | -0.564761000 |
| 6 | -2.268117000 | -0.757431000 | -0.384878000 |
| 6 | -3.642032000 | -0.568362000 | -0.283054000 |
| 6 | -4.231793000 | 0.712088000  | -0.352622000 |
| 6 | -3.384012000 | 1.834930000  | -0.512902000 |
| 6 | 0.221051000  | 2.042606000  | -0.739134000 |
| 6 | 0.032929000  | 0.536290000  | -0.645533000 |
| 1 | -1.857342000 | -1.753870000 | -0.349144000 |

|    |               |              |              |
|----|---------------|--------------|--------------|
| 1  | -4.275058000  | -1.442549000 | -0.171369000 |
| 1  | -3.789667000  | 2.839216000  | -0.528416000 |
| 6  | 1.086296000   | -0.356570000 | -0.679563000 |
| 6  | 2.536117000   | -0.171100000 | -0.576085000 |
| 6  | 0.899259000   | -1.849389000 | -0.896914000 |
| 6  | 3.141693000   | -1.450446000 | -0.721567000 |
| 6  | 3.386515000   | 0.910734000  | -0.303078000 |
| 6  | 4.504441000   | -1.662219000 | -0.632809000 |
| 6  | 4.761445000   | 0.713246000  | -0.211041000 |
| 1  | 2.975246000   | 1.901186000  | -0.189784000 |
| 6  | 5.347410000   | -0.556454000 | -0.379771000 |
| 1  | 4.913671000   | -2.661556000 | -0.720961000 |
| 1  | 5.396616000   | 1.574848000  | -0.032378000 |
| 8  | -0.124375000  | -2.496384000 | -1.067817000 |
| 8  | 1.245886000   | 2.700774000  | -0.849968000 |
| 7  | 2.162868000   | -2.415722000 | -0.926020000 |
| 7  | -1.041937000  | 2.609472000  | -0.729716000 |
| 6  | -1.270728000  | 4.035638000  | -0.823925000 |
| 1  | -1.880475000  | 4.274899000  | -1.701786000 |
| 1  | -1.774834000  | 4.411601000  | 0.073215000  |
| 1  | -0.296381000  | 4.515020000  | -0.918907000 |
| 6  | 2.392289000   | -3.829716000 | -1.134165000 |
| 1  | 3.007298000   | -3.997320000 | -2.024863000 |
| 1  | 2.890906000   | -4.277500000 | -0.267468000 |
| 1  | 1.418471000   | -4.299229000 | -1.273567000 |
| 6  | -5.669336000  | 0.890971000  | -0.258761000 |
| 6  | -6.410379000  | 2.033492000  | -0.572008000 |
| 16 | -6.723077000  | -0.401423000 | 0.298422000  |
| 6  | -7.781951000  | 1.887510000  | -0.382518000 |
| 1  | -5.961296000  | 2.941641000  | -0.955092000 |
| 6  | -8.155627000  | 0.612902000  | 0.092982000  |
| 1  | -8.507946000  | 2.666223000  | -0.586291000 |
| 6  | 6.789842000   | -0.748916000 | -0.297865000 |
| 6  | 7.545999000   | -1.805759000 | -0.784584000 |
| 16 | 7.830653000   | 0.418608000  | 0.490378000  |
| 6  | 8.923833000   | -1.682682000 | -0.542537000 |
| 1  | 7.112615000   | -2.633352000 | -1.333170000 |
| 6  | 9.279510000   | -0.521718000 | 0.143819000  |
| 1  | 9.647402000   | -2.415384000 | -0.877211000 |
| 6  | -9.443776000  | 0.162489000  | 0.381897000  |
| 6  | -9.750028000  | -1.180109000 | 0.866056000  |
| 16 | -10.900337000 | 1.135661000  | 0.207838000  |
| 6  | -11.937809000 | -0.249595000 | 0.779349000  |
| 7  | -11.132962000 | -1.333250000 | 1.059723000  |



|   |               |              |              |
|---|---------------|--------------|--------------|
| 6 | -11.715542000 | -2.582044000 | 1.539853000  |
| 1 | -12.417999000 | -2.977232000 | 0.802673000  |
| 1 | -10.893987000 | -3.281457000 | 1.690952000  |
| 1 | -12.245952000 | -2.412763000 | 2.479560000  |
| 8 | -13.139344000 | -0.197749000 | 0.886462000  |
| 8 | -8.934701000  | -2.070022000 | 1.082504000  |
| 6 | 10.586006000  | -0.083405000 | 0.549495000  |
| 6 | 10.788459000  | 1.181422000  | 1.184615000  |
| 6 | 11.733684000  | -0.910538000 | 0.327934000  |
| 6 | 12.031207000  | 1.598969000  | 1.571476000  |
| 1 | 9.932486000   | 1.828173000  | 1.357149000  |
| 6 | 12.984492000  | -0.512574000 | 0.706553000  |
| 1 | 11.604497000  | -1.878466000 | -0.145029000 |
| 6 | 13.214456000  | 0.773715000  | 1.355444000  |
| 1 | 12.183268000  | 2.560670000  | 2.050803000  |
| 1 | 13.853792000  | -1.140917000 | 0.540870000  |
| 8 | 14.353284000  | 1.145201000  | 1.704243000  |

**S2TIIDTS5- T1** E=-2892.151204 Hartree

|   |              |              |              |
|---|--------------|--------------|--------------|
| 6 | 1.632562000  | -1.644303000 | -0.599687000 |
| 6 | 1.023090000  | -0.356858000 | -0.584377000 |
| 6 | 1.871620000  | 0.751545000  | -0.436940000 |
| 6 | 3.246799000  | 0.569804000  | -0.338983000 |
| 6 | 3.839535000  | -0.710832000 | -0.381534000 |
| 6 | 2.995872000  | -1.840831000 | -0.508853000 |
| 6 | -0.610754000 | -2.063945000 | -0.702843000 |
| 6 | -0.426201000 | -0.556303000 | -0.651552000 |
| 1 | 1.457501000  | 1.747068000  | -0.423637000 |
| 1 | 3.877757000  | 1.448179000  | -0.252848000 |
| 1 | 3.405612000  | -2.843513000 | -0.502440000 |
| 6 | -1.481266000 | 0.333243000  | -0.704834000 |
| 6 | -2.928456000 | 0.148869000  | -0.588302000 |
| 6 | -1.298392000 | 1.821666000  | -0.968804000 |
| 6 | -3.537705000 | 1.422200000  | -0.769216000 |
| 6 | -3.774881000 | -0.926651000 | -0.277608000 |
| 6 | -4.900127000 | 1.633366000  | -0.679612000 |
| 6 | -5.149147000 | -0.729482000 | -0.184155000 |
| 1 | -3.360476000 | -1.912182000 | -0.136199000 |
| 6 | -5.739162000 | 0.533621000  | -0.388534000 |
| 1 | -5.312257000 | 2.628504000  | -0.796155000 |
| 1 | -5.781228000 | -1.586441000 | 0.024754000  |
| 8 | -0.276193000 | 2.462755000  | -1.164891000 |
| 8 | -1.634168000 | -2.727545000 | -0.787488000 |

|    |               |              |              |
|----|---------------|--------------|--------------|
| 7  | -2.562433000  | 2.383622000  | -1.008181000 |
| 7  | 0.654721000   | -2.627228000 | -0.688529000 |
| 6  | 0.886620000   | -4.055275000 | -0.746369000 |
| 1  | 1.489910000   | -4.316246000 | -1.622400000 |
| 1  | 1.398255000   | -4.405626000 | 0.156762000  |
| 1  | -0.087153000  | -4.539302000 | -0.820940000 |
| 6  | -2.796969000  | 3.790555000  | -1.257982000 |
| 1  | -3.417137000  | 3.928825000  | -2.149976000 |
| 1  | -3.291999000  | 4.262595000  | -0.402339000 |
| 1  | -1.825502000  | 4.258557000  | -1.417009000 |
| 6  | 5.278044000   | -0.881134000 | -0.293555000 |
| 6  | 6.019560000   | -2.028081000 | -0.594257000 |
| 16 | 6.330529000   | 0.420299000  | 0.236528000  |
| 6  | 7.389027000   | -1.868055000 | -0.413992000 |
| 1  | 5.575334000   | -2.944874000 | -0.961786000 |
| 6  | 7.762889000   | -0.585457000 | 0.040527000  |
| 1  | 8.105594000   | -2.654482000 | -0.615385000 |
| 6  | -7.181234000  | 0.724961000  | -0.304477000 |
| 6  | -7.941514000  | 1.769484000  | -0.811248000 |
| 16 | -8.216415000  | -0.427456000 | 0.512807000  |
| 6  | -9.317951000  | 1.648834000  | -0.561175000 |
| 1  | -7.512557000  | 2.586228000  | -1.379221000 |
| 6  | -9.668004000  | 0.502344000  | 0.151974000  |
| 1  | -10.044396000 | 2.372703000  | -0.908431000 |
| 6  | 9.077521000   | -0.133023000 | 0.317048000  |
| 6  | 10.207029000  | -0.967531000 | 0.165358000  |
| 6  | 9.285394000   | 1.254122000  | 0.778949000  |
| 6  | 11.479999000  | -0.519813000 | 0.430875000  |
| 1  | 10.082230000  | -1.991254000 | -0.168282000 |
| 6  | 11.736690000  | 0.857762000  | 0.889662000  |
| 6  | 12.604279000  | -1.378430000 | 0.270620000  |
| 7  | 13.494801000  | -2.114692000 | 0.126078000  |
| 8  | 8.352011000   | 2.040094000  | 0.941358000  |
| 8  | 12.858213000  | 1.279221000  | 1.131164000  |
| 7  | 10.592616000  | 1.663242000  | 1.033161000  |
| 6  | 10.767112000  | 3.047910000  | 1.489074000  |
| 1  | 10.372778000  | 3.735696000  | 0.738518000  |
| 1  | 10.217273000  | 3.202138000  | 2.419596000  |
| 1  | 11.830917000  | 3.212205000  | 1.639784000  |
| 6  | -10.972101000 | 0.070438000  | 0.573073000  |
| 6  | -11.168448000 | -1.179653000 | 1.238523000  |
| 6  | -12.122360000 | 0.889641000  | 0.336279000  |
| 6  | -12.408574000 | -1.591038000 | 1.639988000  |
| 1  | -10.310171000 | -1.819999000 | 1.423008000  |

|   |               |              |              |
|---|---------------|--------------|--------------|
| 6 | -13.370720000 | 0.497718000  | 0.729004000  |
| 1 | -11.997398000 | 1.846309000  | -0.160060000 |
| 6 | -13.594549000 | -0.773607000 | 1.408957000  |
| 1 | -12.556594000 | -2.541441000 | 2.142486000  |
| 1 | -14.242335000 | 1.119654000  | 0.551927000  |
| 8 | -14.730926000 | -1.139539000 | 1.770744000  |

**S2TIIDTS6- T1** E=-3253.472244 Hartree

|   |              |              |              |
|---|--------------|--------------|--------------|
| 6 | -1.249169000 | 1.692221000  | -0.597655000 |
| 6 | -0.651347000 | 0.398422000  | -0.566483000 |
| 6 | -1.510762000 | -0.699792000 | -0.397753000 |
| 6 | -2.882017000 | -0.502785000 | -0.294178000 |
| 6 | -3.465789000 | 0.784330000  | -0.352402000 |
| 6 | -2.608487000 | 1.904045000  | -0.502583000 |
| 6 | 0.997502000  | 2.086632000  | -0.724751000 |
| 6 | 0.797695000  | 0.581858000  | -0.645824000 |
| 1 | -1.106237000 | -1.698979000 | -0.370470000 |
| 1 | -3.519427000 | -1.373368000 | -0.182364000 |
| 1 | -3.006634000 | 2.910887000  | -0.519939000 |
| 6 | 1.843915000  | -0.319740000 | -0.688890000 |
| 6 | 3.293141000  | -0.147911000 | -0.578770000 |
| 6 | 1.645365000  | -1.809497000 | -0.929166000 |
| 6 | 3.889114000  | -1.430092000 | -0.740247000 |
| 6 | 4.150727000  | 0.924010000  | -0.287145000 |
| 6 | 5.249792000  | -1.653305000 | -0.649604000 |
| 6 | 5.523289000  | 0.714676000  | -0.193231000 |
| 1 | 3.746359000  | 1.915848000  | -0.161364000 |
| 6 | 6.099913000  | -0.557419000 | -0.378147000 |
| 1 | 5.651991000  | -2.654237000 | -0.750398000 |
| 1 | 6.164530000  | 1.568507000  | -0.000006000 |
| 8 | 0.616419000  | -2.443195000 | -1.114035000 |
| 8 | 2.027524000  | 2.737151000  | -0.828964000 |
| 7 | 2.903832000  | -2.385147000 | -0.961783000 |
| 7 | -0.261585000 | 2.663206000  | -0.710563000 |
| 6 | -0.479519000 | 4.092315000  | -0.792368000 |
| 1 | -1.085512000 | 4.343820000  | -1.669276000 |
| 1 | -0.982368000 | 4.463427000  | 0.107368000  |
| 1 | 0.498562000  | 4.565118000  | -0.881135000 |
| 6 | 3.123354000  | -3.798059000 | -1.190056000 |
| 1 | 3.740057000  | -3.956733000 | -2.081082000 |
| 1 | 3.615421000  | -4.261874000 | -0.328203000 |
| 1 | 2.146727000  | -4.258377000 | -1.339748000 |
| 6 | -4.896944000 | 0.967037000  | -0.256712000 |

|    |               |              |              |
|----|---------------|--------------|--------------|
| 6  | -5.621680000  | 2.154222000  | -0.446955000 |
| 16 | -5.976390000  | -0.365872000 | 0.136028000  |
| 6  | -6.989126000  | 2.010915000  | -0.290753000 |
| 1  | -5.159301000  | 3.097361000  | -0.711184000 |
| 6  | -7.395689000  | 0.686205000  | 0.036544000  |
| 1  | -7.716201000  | 2.800556000  | -0.402337000 |
| 6  | 7.540757000   | -0.761926000 | -0.294031000 |
| 6  | 8.290218000   | -1.817584000 | -0.792812000 |
| 16 | 8.587320000   | 0.387088000  | 0.513021000  |
| 6  | 9.668373000   | -1.707884000 | -0.544800000 |
| 1  | 7.852727000   | -2.634534000 | -1.353947000 |
| 6  | 10.029739000  | -0.559138000 | 0.158333000  |
| 1  | 10.387697000  | -2.441231000 | -0.886996000 |
| 6  | -8.703079000  | 0.219520000  | 0.261671000  |
| 6  | -9.851543000  | 1.122403000  | 0.179359000  |
| 6  | -8.907082000  | -1.186832000 | 0.580643000  |
| 6  | -11.340708000 | -0.794911000 | 0.719477000  |
| 8  | -7.973041000  | -1.985399000 | 0.667005000  |
| 7  | -10.228914000 | -1.616843000 | 0.791149000  |
| 6  | -10.418858000 | -3.041356000 | 1.109132000  |
| 1  | -11.059873000 | -3.504748000 | 0.358039000  |
| 1  | -9.435188000  | -3.502070000 | 1.115626000  |
| 1  | -10.900723000 | -3.141253000 | 2.082615000  |
| 7  | -11.118768000 | 0.537605000  | 0.419518000  |
| 6  | -12.280651000 | 1.438132000  | 0.337991000  |
| 1  | -12.967191000 | 1.085894000  | -0.433062000 |
| 1  | -12.809356000 | 1.445491000  | 1.292091000  |
| 1  | -11.903218000 | 2.427401000  | 0.097186000  |
| 8  | -9.776713000  | 2.320680000  | -0.078382000 |
| 16 | -12.882646000 | -1.390695000 | 0.985277000  |
| 6  | 11.338609000  | -0.135670000 | 0.574671000  |
| 6  | 11.547591000  | 1.119162000  | 1.226870000  |
| 6  | 12.480448000  | -0.968605000 | 0.346161000  |
| 6  | 12.792034000  | 1.522477000  | 1.623577000  |
| 1  | 10.695818000  | 1.769961000  | 1.404788000  |
| 6  | 13.732920000  | -0.584951000 | 0.734335000  |
| 1  | 12.345732000  | -1.929280000 | -0.139791000 |
| 6  | 13.969678000  | 0.691090000  | 1.400705000  |
| 1  | 12.949613000  | 2.476626000  | 2.115982000  |
| 1  | 14.598195000  | -1.217437000 | 0.563600000  |
| 8  | 15.109929000  | 1.049496000  | 1.758331000  |

S2TIIDTS7- T1 E=-3007.403170 Hartree

|    |              |              |              |
|----|--------------|--------------|--------------|
| 6  | 1.073746000  | -1.724299000 | -0.906668000 |
| 6  | 0.487409000  | -0.430711000 | -0.793278000 |
| 6  | 1.359272000  | 0.654537000  | -0.612595000 |
| 6  | 2.733821000  | 0.446798000  | -0.572173000 |
| 6  | 3.300506000  | -0.838836000 | -0.707370000 |
| 6  | 2.435503000  | -1.947280000 | -0.873264000 |
| 6  | -1.178319000 | -2.103100000 | -0.959667000 |
| 6  | -0.966884000 | -0.604139000 | -0.822785000 |
| 1  | 0.963277000  | 1.654133000  | -0.531221000 |
| 1  | 3.384508000  | 1.309095000  | -0.469737000 |
| 1  | 2.830241000  | -2.954024000 | -0.936994000 |
| 6  | -2.008519000 | 0.301923000  | -0.784025000 |
| 6  | -3.454563000 | 0.131046000  | -0.632209000 |
| 6  | -1.810113000 | 1.801803000  | -0.956115000 |
| 6  | -4.048238000 | 1.422093000  | -0.710953000 |
| 6  | -4.308602000 | -0.949916000 | -0.364513000 |
| 6  | -5.403672000 | 1.646532000  | -0.564026000 |
| 6  | -5.675955000 | -0.739500000 | -0.214249000 |
| 1  | -3.906325000 | -1.948401000 | -0.300329000 |
| 6  | -6.251086000 | 0.542504000  | -0.317551000 |
| 1  | -5.802707000 | 2.653015000  | -0.602802000 |
| 1  | -6.315256000 | -1.599066000 | -0.040989000 |
| 8  | -0.784643000 | 2.440520000  | -1.141122000 |
| 8  | -2.214926000 | -2.745134000 | -1.050577000 |
| 7  | -3.065706000 | 2.382940000  | -0.918655000 |
| 7  | 0.076977000  | -2.685132000 | -1.020860000 |
| 6  | 0.283010000  | -4.110092000 | -1.174648000 |
| 1  | 0.853046000  | -4.324533000 | -2.084864000 |
| 1  | 0.818152000  | -4.523323000 | -0.312688000 |
| 1  | -0.700601000 | -4.574250000 | -1.246153000 |
| 6  | -3.284725000 | 3.806431000  | -1.069199000 |
| 1  | -3.930469000 | 4.011341000  | -1.929659000 |
| 1  | -3.744472000 | 4.228923000  | -0.169107000 |
| 1  | -2.311175000 | 4.269689000  | -1.229422000 |
| 6  | 4.735693000  | -1.040775000 | -0.673965000 |
| 6  | 5.460588000  | -2.152843000 | -1.118934000 |
| 16 | 5.817295000  | 0.174236000  | -0.033443000 |
| 6  | 6.834674000  | -2.038942000 | -0.952117000 |
| 1  | 4.988843000  | -3.009873000 | -1.583649000 |
| 6  | 7.241736000  | -0.810280000 | -0.374953000 |
| 1  | 7.559423000  | -2.791979000 | -1.226488000 |
| 6  | -7.686603000 | 0.748845000  | -0.174824000 |
| 6  | -8.445363000 | 1.833801000  | -0.590617000 |
| 16 | -8.713975000 | -0.437507000 | 0.602730000  |

|   |               |              |              |
|---|---------------|--------------|--------------|
| 6 | -9.814993000  | 1.717501000  | -0.303568000 |
| 1 | -8.021207000  | 2.678157000  | -1.120536000 |
| 6 | -10.160973000 | 0.533806000  | 0.348081000  |
| 1 | -10.540153000 | 2.472030000  | -0.581338000 |
| 6 | 8.554894000   | -0.487013000 | 0.014960000  |
| 6 | 9.574094000   | -1.569512000 | 0.233520000  |
| 6 | 9.138067000   | 0.754891000  | 0.474059000  |
| 6 | 10.657540000  | -0.949945000 | 1.032698000  |
| 6 | 10.381841000  | 0.416063000  | 1.224031000  |
| 6 | 11.784952000  | -1.564338000 | 1.558684000  |
| 6 | 11.259918000  | 1.188715000  | 1.987738000  |
| 6 | 12.660438000  | -0.787422000 | 2.321485000  |
| 1 | 11.961388000  | -2.619230000 | 1.374801000  |
| 6 | 12.390802000  | 0.568831000  | 2.533518000  |
| 1 | 11.086698000  | 2.239887000  | 2.173562000  |
| 1 | 13.549905000  | -1.234392000 | 2.754489000  |
| 1 | 13.073294000  | 1.161450000  | 3.135003000  |
| 8 | 9.525431000   | -2.735861000 | -0.129103000 |
| 6 | 8.743396000   | 2.049157000  | 0.152344000  |
| 6 | 7.811202000   | 2.368314000  | -0.880159000 |
| 7 | 7.102471000   | 2.692233000  | -1.746595000 |
| 6 | 9.350195000   | 3.206348000  | 0.728647000  |
| 7 | 9.808993000   | 4.171899000  | 1.193055000  |
| 6 | -11.457881000 | 0.095206000  | 0.784079000  |
| 6 | -11.653717000 | -1.191475000 | 1.375843000  |
| 6 | -12.601385000 | 0.944421000  | 0.637509000  |
| 6 | -12.887025000 | -1.609231000 | 1.791530000  |
| 1 | -10.800782000 | -1.854748000 | 1.491149000  |
| 6 | -13.842862000 | 0.546721000  | 1.045972000  |
| 1 | -12.476472000 | 1.928747000  | 0.198536000  |
| 6 | -14.066029000 | -0.761632000 | 1.651794000  |
| 1 | -13.034611000 | -2.587310000 | 2.237930000  |
| 1 | -14.709157000 | 1.191406000  | 0.937299000  |
| 8 | -15.196162000 | -1.133031000 | 2.027502000  |

**S2TIIDTS8-T1** E=-3442.623504 Hartree

|   |              |              |              |
|---|--------------|--------------|--------------|
| 6 | -4.517805000 | 1.487183000  | -0.658726000 |
| 6 | -3.906133000 | 0.202469000  | -0.626925000 |
| 6 | -4.744658000 | -0.899191000 | -0.395954000 |
| 6 | -6.114179000 | -0.713166000 | -0.235586000 |
| 6 | -6.707353000 | 0.563728000  | -0.292487000 |
| 6 | -5.875649000 | 1.687502000  | -0.501507000 |
| 6 | -2.286077000 | 1.906918000  | -0.894279000 |

|    |               |              |              |
|----|---------------|--------------|--------------|
| 6  | -2.463376000  | 0.398326000  | -0.775609000 |
| 1  | -4.328512000  | -1.893630000 | -0.367747000 |
| 1  | -6.740993000  | -1.587120000 | -0.091233000 |
| 1  | -6.288525000  | 2.689100000  | -0.504101000 |
| 6  | -1.409815000  | -0.491200000 | -0.849623000 |
| 6  | 0.042887000   | -0.298464000 | -0.819111000 |
| 6  | -1.600811000  | -1.987036000 | -1.038003000 |
| 6  | 0.645775000   | -1.579102000 | -0.980576000 |
| 6  | 0.899605000   | 0.791765000  | -0.603364000 |
| 6  | 2.011234000   | -1.783932000 | -0.960271000 |
| 6  | 2.277599000   | 0.601973000  | -0.575948000 |
| 1  | 0.489986000   | 1.782156000  | -0.485508000 |
| 6  | 2.859392000   | -0.669822000 | -0.758593000 |
| 1  | 2.420978000   | -2.781959000 | -1.058207000 |
| 1  | 2.917350000   | 1.469095000  | -0.448178000 |
| 8  | -2.628598000  | -2.640063000 | -1.147173000 |
| 8  | -1.269728000  | 2.565610000  | -1.057569000 |
| 7  | -0.337557000  | -2.548916000 | -1.124512000 |
| 7  | -3.549139000  | 2.468573000  | -0.834026000 |
| 6  | -3.788503000  | 3.893447000  | -0.932859000 |
| 1  | -4.439248000  | 4.119805000  | -1.784078000 |
| 1  | -4.251817000  | 4.276627000  | -0.017175000 |
| 1  | -2.822058000  | 4.375997000  | -1.078335000 |
| 6  | -0.112164000  | -3.965019000 | -1.327772000 |
| 1  | 0.456617000   | -4.139973000 | -2.247111000 |
| 1  | 0.432479000   | -4.399576000 | -0.482508000 |
| 1  | -1.089449000  | -4.440341000 | -1.411215000 |
| 6  | -8.144825000  | 0.744899000  | -0.139584000 |
| 6  | -8.918722000  | 1.835644000  | -0.510661000 |
| 16 | -9.155183000  | -0.485275000 | 0.590898000  |
| 6  | -10.285963000 | 1.689793000  | -0.227005000 |
| 1  | -8.506877000  | 2.706321000  | -1.006592000 |
| 6  | -10.615160000 | 0.476307000  | 0.377260000  |
| 1  | -11.021408000 | 2.445339000  | -0.473072000 |
| 6  | 4.299130000   | -0.854206000 | -0.738453000 |
| 6  | 5.036878000   | -1.919380000 | -1.262903000 |
| 16 | 5.358910000   | 0.321697000  | -0.000764000 |
| 6  | 6.410644000   | -1.796527000 | -1.082567000 |
| 1  | 4.578385000   | -2.742437000 | -1.796439000 |
| 6  | 6.792980000   | -0.613300000 | -0.415283000 |
| 1  | 7.138576000   | -2.508621000 | -1.451480000 |
| 6  | 8.101182000   | -0.303068000 | 0.003941000  |
| 6  | 8.739167000   | 0.893494000  | 0.425079000  |
| 6  | 10.376391000  | -0.731354000 | 1.165594000  |

|    |               |              |              |
|----|---------------|--------------|--------------|
| 6  | 9.987714000   | 0.616693000  | 1.196840000  |
| 6  | 11.524262000  | -1.219499000 | 1.769254000  |
| 6  | 10.810326000  | 1.506736000  | 1.902575000  |
| 6  | 12.330384000  | -0.314768000 | 2.462428000  |
| 1  | 11.778244000  | -2.272376000 | 1.707406000  |
| 6  | 11.965336000  | 1.031818000  | 2.527539000  |
| 1  | 10.565341000  | 2.555886000  | 1.982175000  |
| 1  | 13.234384000  | -0.660076000 | 2.953381000  |
| 1  | 12.588668000  | 1.731594000  | 3.075025000  |
| 6  | 8.322829000   | 2.183288000  | 0.044681000  |
| 6  | 8.851585000   | 3.386417000  | 0.591737000  |
| 7  | 9.236939000   | 4.399996000  | 1.022244000  |
| 6  | 7.417376000   | 2.423277000  | -1.028512000 |
| 7  | 6.720221000   | 2.681135000  | -1.926920000 |
| 16 | 9.201826000   | -1.726634000 | 0.274806000  |
| 8  | 8.568095000   | -2.698137000 | 1.177831000  |
| 8  | 9.748761000   | -2.205827000 | -1.005253000 |
| 6  | -11.905303000 | 0.003785000  | 0.797065000  |
| 6  | -12.082544000 | -1.306546000 | 1.341049000  |
| 6  | -13.060735000 | 0.841775000  | 0.682049000  |
| 6  | -13.309488000 | -1.756593000 | 1.741339000  |
| 1  | -11.220268000 | -1.961479000 | 1.431928000  |
| 6  | -14.296162000 | 0.411914000  | 1.075789000  |
| 1  | -12.950084000 | 1.843107000  | 0.279234000  |
| 6  | -14.500404000 | -0.920933000 | 1.633145000  |
| 1  | -13.443057000 | -2.752366000 | 2.151540000  |
| 1  | -15.171566000 | 1.047792000  | 0.990940000  |
| 8  | -15.624817000 | -1.321742000 | 1.995115000  |

**S2TIIDTS9-T1** E=-3428.563934 Hartree

|   |              |              |              |
|---|--------------|--------------|--------------|
| 6 | 3.646740000  | -1.469072000 | -0.658096000 |
| 6 | 3.054231000  | -0.179049000 | -0.555206000 |
| 6 | 3.917295000  | 0.901929000  | -0.322860000 |
| 6 | 5.290881000  | 0.693224000  | -0.228406000 |
| 6 | 5.863184000  | -0.587281000 | -0.354615000 |
| 6 | 5.008100000  | -1.691861000 | -0.566435000 |
| 6 | 1.397278000  | -1.844518000 | -0.810591000 |
| 6 | 1.601966000  | -0.353928000 | -0.647552000 |
| 1 | 3.517290000  | 1.900371000  | -0.243931000 |
| 1 | 5.935920000  | 1.553919000  | -0.082863000 |
| 1 | 5.406746000  | -2.698051000 | -0.620859000 |
| 6 | 0.556481000  | 0.554994000  | -0.638736000 |
| 6 | -0.886683000 | 0.385298000  | -0.536094000 |



|    |               |              |              |
|----|---------------|--------------|--------------|
| 6  | 0.763210000   | 2.053674000  | -0.794137000 |
| 6  | -1.482882000  | 1.678020000  | -0.616300000 |
| 6  | -1.754733000  | -0.699114000 | -0.314800000 |
| 6  | -2.838528000  | 1.902685000  | -0.514138000 |
| 6  | -3.122198000  | -0.489607000 | -0.205417000 |
| 1  | -1.354582000  | -1.698719000 | -0.249918000 |
| 6  | -3.703830000  | 0.796286000  | -0.308067000 |
| 1  | -3.229930000  | 2.910604000  | -0.578120000 |
| 1  | -3.761313000  | -1.352331000 | -0.045816000 |
| 8  | 1.794643000   | 2.693846000  | -0.946774000 |
| 8  | 0.366661000   | -2.490412000 | -0.953987000 |
| 7  | -0.491800000  | 2.638962000  | -0.785897000 |
| 7  | 2.656344000   | -2.428136000 | -0.825168000 |
| 6  | 2.866905000   | -3.850386000 | -0.983993000 |
| 1  | 3.475682000   | -4.058533000 | -1.870726000 |
| 1  | 3.364093000   | -4.274864000 | -0.104495000 |
| 1  | 1.886055000   | -4.311223000 | -1.102492000 |
| 6  | -0.702277000  | 4.062704000  | -0.932002000 |
| 1  | -1.319290000  | 4.277849000  | -1.811279000 |
| 1  | -1.190815000  | 4.480244000  | -0.044475000 |
| 1  | 0.277505000   | 4.524218000  | -1.056345000 |
| 6  | 7.304337000   | -0.791951000 | -0.271440000 |
| 6  | 8.049758000   | -1.866422000 | -0.735181000 |
| 16 | 8.357732000   | 0.382215000  | 0.490051000  |
| 6  | 9.429402000   | -1.751346000 | -0.497416000 |
| 1  | 7.606802000   | -2.701099000 | -1.265070000 |
| 6  | 9.797920000   | -0.579087000 | 0.161936000  |
| 1  | 10.145444000  | -2.498158000 | -0.817064000 |
| 6  | -5.129066000  | 0.994167000  | -0.204479000 |
| 6  | -5.860298000  | 2.179270000  | -0.335788000 |
| 16 | -6.229507000  | -0.348116000 | 0.128762000  |
| 6  | -7.235373000  | 2.040203000  | -0.181793000 |
| 1  | -5.391264000  | 3.132235000  | -0.548751000 |
| 6  | -7.647104000  | 0.713063000  | 0.081778000  |
| 1  | -7.935210000  | 2.864234000  | -0.258277000 |
| 6  | -8.937804000  | 0.239888000  | 0.283150000  |
| 16 | -9.303252000  | -1.456349000 | 0.599925000  |
| 16 | -10.342839000 | 1.312234000  | 0.239287000  |
| 6  | -11.055382000 | -1.250087000 | 0.724478000  |
| 6  | -11.544832000 | 0.054064000  | 0.554215000  |
| 6  | -11.934766000 | -2.305482000 | 0.978045000  |
| 6  | -12.916225000 | 0.307455000  | 0.636936000  |
| 6  | -13.302312000 | -2.047699000 | 1.059782000  |
| 1  | -11.555139000 | -3.313736000 | 1.109387000  |

|   |               |              |              |
|---|---------------|--------------|--------------|
| 6 | -13.790067000 | -0.748796000 | 0.890180000  |
| 1 | -13.294815000 | 1.316055000  | 0.505135000  |
| 1 | -13.988687000 | -2.864866000 | 1.256553000  |
| 1 | -14.855956000 | -0.555600000 | 0.955047000  |
| 6 | 11.109183000  | -0.143955000 | 0.554721000  |
| 6 | 11.325702000  | 1.133011000  | 1.160037000  |
| 6 | 12.249021000  | -0.986199000 | 0.350532000  |
| 6 | 12.573361000  | 1.547553000  | 1.534701000  |
| 1 | 10.476248000  | 1.791713000  | 1.319209000  |
| 6 | 13.504403000  | -0.591339000 | 0.717447000  |
| 1 | 12.109805000  | -1.963656000 | -0.099599000 |
| 6 | 13.748533000  | 0.707034000  | 1.335929000  |
| 1 | 12.735101000  | 2.518739000  | 1.991321000  |
| 1 | 14.367215000  | -1.231850000 | 0.564530000  |
| 8 | 14.891939000  | 1.075680000  | 1.674012000  |

**S2TIIDTS10-T1** E=-3274.905399 Hartree

|   |              |              |              |
|---|--------------|--------------|--------------|
| 6 | 2.550717000  | -1.488512000 | -0.595104000 |
| 6 | 1.921625000  | -0.217091000 | -0.450835000 |
| 6 | 2.758857000  | 0.872291000  | -0.149467000 |
| 6 | 4.128777000  | 0.688594000  | -0.025703000 |
| 6 | 4.743507000  | -0.575057000 | -0.192029000 |
| 6 | 3.909346000  | -1.687147000 | -0.479698000 |
| 6 | 0.318032000  | -1.905228000 | -0.838229000 |
| 6 | 0.485296000  | -0.414014000 | -0.591037000 |
| 1 | 2.333244000  | 1.856729000  | -0.034082000 |
| 1 | 4.743596000  | 1.555103000  | 0.196646000  |
| 1 | 4.326373000  | -2.680154000 | -0.594823000 |
| 6 | -0.581881000 | 0.469224000  | -0.566431000 |
| 6 | -2.030774000 | 0.255170000  | -0.511447000 |
| 6 | -0.410906000 | 1.970945000  | -0.638229000 |
| 6 | -2.652877000 | 1.534788000  | -0.549693000 |
| 6 | -2.870948000 | -0.857535000 | -0.358551000 |
| 6 | -4.020647000 | 1.719809000  | -0.470110000 |
| 6 | -4.250627000 | -0.687013000 | -0.277044000 |
| 1 | -2.448046000 | -1.849264000 | -0.330929000 |
| 6 | -4.851870000 | 0.584956000  | -0.338616000 |
| 1 | -4.442844000 | 2.717837000  | -0.472892000 |
| 1 | -4.876821000 | -1.569637000 | -0.193823000 |
| 8 | 0.605906000  | 2.648255000  | -0.724422000 |
| 8 | -0.694548000 | -2.559131000 | -1.048268000 |

|    |               |              |              |
|----|---------------|--------------|--------------|
| 7  | -1.683512000  | 2.524874000  | -0.642166000 |
| 7  | 1.586633000   | -2.460622000 | -0.840023000 |
| 6  | 1.834265000   | -3.867945000 | -1.065220000 |
| 1  | 2.472108000   | -4.016464000 | -1.943421000 |
| 1  | 2.316684000   | -4.325798000 | -0.194371000 |
| 1  | 0.868371000   | -4.343873000 | -1.235457000 |
| 6  | -1.925932000  | 3.948685000  | -0.721288000 |
| 1  | -2.524884000  | 4.194484000  | -1.605077000 |
| 1  | -2.447724000  | 4.309044000  | 0.172469000  |
| 1  | -0.954723000  | 4.438384000  | -0.795059000 |
| 6  | 6.171006000   | -0.745609000 | -0.071878000 |
| 6  | 6.933884000   | -1.902279000 | -0.258358000 |
| 16 | 7.232063000   | 0.599853000  | 0.363100000  |
| 6  | 8.302655000   | -1.739767000 | -0.068156000 |
| 1  | 6.493096000   | -2.851751000 | -0.537179000 |
| 6  | 8.675467000   | -0.422459000 | 0.282064000  |
| 1  | 9.024152000   | -2.540980000 | -0.179149000 |
| 6  | -6.298744000  | 0.750639000  | -0.269508000 |
| 6  | -7.062509000  | 1.832001000  | -0.684910000 |
| 16 | -7.335405000  | -0.489162000 | 0.406063000  |
| 6  | -8.442588000  | 1.671378000  | -0.478226000 |
| 1  | -6.631409000  | 2.705517000  | -1.159034000 |
| 6  | -8.793127000  | 0.455293000  | 0.107510000  |
| 1  | -9.171301000  | 2.418291000  | -0.767570000 |
| 6  | 9.950467000   | 0.070349000  | 0.538354000  |
| 16 | 10.278615000  | 1.753846000  | 0.964414000  |
| 16 | 11.394239000  | -0.952395000 | 0.462934000  |
| 6  | 12.017069000  | 1.549411000  | 1.107291000  |
| 6  | 12.519763000  | 0.328788000  | 0.880856000  |
| 1  | 13.569835000  | 0.069890000  | 0.936207000  |
| 1  | 12.600565000  | 2.422205000  | 1.372507000  |
| 6  | -10.099553000 | -0.031870000 | 0.452204000  |
| 6  | -10.294479000 | -1.344762000 | 0.983505000  |
| 6  | -11.256445000 | 0.792689000  | 0.273157000  |
| 6  | -11.537580000 | -1.808846000 | 1.312396000  |
| 1  | -9.431690000  | -1.990578000 | 1.122499000  |
| 6  | -12.507632000 | 0.348454000  | 0.595153000  |
| 1  | -11.134107000 | 1.796221000  | -0.121029000 |
| 6  | -12.729830000 | -0.987163000 | 1.137970000  |
| 1  | -11.682758000 | -2.807044000 | 1.712883000  |
| 1  | -13.383414000 | 0.975484000  | 0.461257000  |
| 8  | -13.869239000 | -1.400963000 | 1.434740000  |

S9TIIDTS1-CS E=-3346.077355 Hartree

|    |              |              |              |
|----|--------------|--------------|--------------|
| 6  | 0.791192000  | 1.794010000  | 0.617198000  |
| 6  | 0.158145000  | 0.497404000  | 0.572561000  |
| 6  | 1.003710000  | -0.624446000 | 0.363479000  |
| 6  | 2.360361000  | -0.450869000 | 0.236195000  |
| 6  | 2.984008000  | 0.835432000  | 0.304673000  |
| 6  | 2.142902000  | 1.977576000  | 0.496872000  |
| 6  | -1.452683000 | 2.167088000  | 0.812860000  |
| 6  | -1.243370000 | 0.688120000  | 0.684819000  |
| 1  | 0.575700000  | -1.615297000 | 0.333790000  |
| 1  | 2.980611000  | -1.328801000 | 0.082542000  |
| 1  | 2.563148000  | 2.974923000  | 0.540127000  |
| 6  | -2.309788000 | -0.247073000 | 0.725193000  |
| 6  | -3.692264000 | -0.094722000 | 0.486345000  |
| 6  | -2.117597000 | -1.690337000 | 1.128122000  |
| 6  | -4.333986000 | -1.370481000 | 0.705610000  |
| 6  | -4.520128000 | 0.971446000  | 0.031567000  |
| 6  | -5.670817000 | -1.585838000 | 0.518696000  |
| 6  | -5.860627000 | 0.766825000  | -0.165395000 |
| 1  | -4.085686000 | 1.946981000  | -0.129867000 |
| 6  | -6.494344000 | -0.500342000 | 0.071648000  |
| 1  | -6.097690000 | -2.565107000 | 0.696074000  |
| 1  | -6.467503000 | 1.598741000  | -0.507886000 |
| 8  | -1.099762000 | -2.282127000 | 1.461566000  |
| 8  | -2.484542000 | 2.811339000  | 0.958777000  |
| 7  | -3.374707000 | -2.288428000 | 1.100561000  |
| 7  | -0.186666000 | 2.757908000  | 0.779190000  |
| 6  | 0.023099000  | 4.184114000  | 0.892291000  |
| 1  | 0.643772000  | 4.422660000  | 1.763197000  |
| 1  | 0.503061000  | 4.585303000  | -0.007690000 |
| 1  | -0.958197000 | 4.644252000  | 1.012885000  |
| 6  | -3.602912000 | -3.675529000 | 1.442625000  |
| 1  | -4.290987000 | -3.761890000 | 2.290563000  |
| 1  | -4.015839000 | -4.228096000 | 0.591296000  |
| 1  | -2.638105000 | -4.103227000 | 1.716766000  |
| 6  | 4.383873000  | 0.982814000  | 0.182029000  |
| 6  | 5.149433000  | 2.179741000  | 0.228695000  |
| 16 | 5.464935000  | -0.395149000 | -0.065363000 |
| 6  | 6.501739000  | 2.006447000  | 0.076264000  |
| 1  | 4.693819000  | 3.150600000  | 0.374518000  |
| 6  | 6.900207000  | 0.649524000  | -0.102105000 |
| 1  | 7.215948000  | 2.822195000  | 0.088790000  |
| 6  | -7.877164000 | -0.679235000 | -0.132295000 |

|    |               |              |              |
|----|---------------|--------------|--------------|
| 6  | -8.649564000  | -1.852825000 | 0.063741000  |
| 16 | -8.933333000  | 0.626924000  | -0.707161000 |
| 6  | -9.986541000  | -1.721751000 | -0.223896000 |
| 1  | -8.214649000  | -2.780279000 | 0.415767000  |
| 6  | -10.346847000 | -0.417179000 | -0.669850000 |
| 1  | -10.721041000 | -2.512288000 | -0.131416000 |
| 6  | -11.620131000 | 0.021330000  | -1.036884000 |
| 6  | -12.721569000 | -0.876508000 | -0.983794000 |
| 7  | -13.607215000 | -1.633978000 | -0.931176000 |
| 6  | -11.854363000 | 1.353762000  | -1.469091000 |
| 7  | -12.020867000 | 2.453556000  | -1.821384000 |
| 6  | 8.175523000   | 0.161273000  | -0.278450000 |
| 16 | 9.592611000   | 1.212682000  | -0.310996000 |
| 16 | 8.520733000   | -1.551442000 | -0.487906000 |
| 6  | 10.779317000  | -0.073763000 | -0.559313000 |
| 6  | 10.273503000  | -1.379203000 | -0.642831000 |
| 6  | 12.152152000  | 0.159797000  | -0.670759000 |
| 6  | 11.136163000  | -2.460387000 | -0.838284000 |
| 6  | 13.009427000  | -0.921577000 | -0.865738000 |
| 1  | 12.543915000  | 1.169744000  | -0.606170000 |
| 6  | 12.504968000  | -2.223067000 | -0.948956000 |
| 1  | 10.743972000  | -3.470170000 | -0.902738000 |
| 1  | 14.076679000  | -0.746506000 | -0.953043000 |
| 1  | 13.180407000  | -3.058492000 | -1.100841000 |

**S9TIIDTS3-CS** E=-3913.931013 Hartree

|   |              |              |              |
|---|--------------|--------------|--------------|
| 6 | -2.574914000 | -1.445858000 | 0.866703000  |
| 6 | -1.957942000 | -0.157797000 | 0.689678000  |
| 6 | -2.813440000 | 0.918852000  | 0.339761000  |
| 6 | -4.165954000 | 0.710264000  | 0.200492000  |
| 6 | -4.771054000 | -0.568505000 | 0.397220000  |
| 6 | -3.922031000 | -1.664903000 | 0.736439000  |
| 6 | -0.338566000 | -1.779607000 | 1.153767000  |
| 6 | -0.553034000 | -0.314040000 | 0.848821000  |
| 1 | -2.397563000 | 1.906581000  | 0.208940000  |
| 1 | -4.794369000 | 1.555117000  | -0.062452000 |
| 1 | -4.330400000 | -2.657631000 | 0.879713000  |
| 6 | 0.502408000  | 0.621938000  | 0.808545000  |
| 6 | 1.910477000  | 0.446141000  | 0.655052000  |
| 6 | 0.290727000  | 2.099669000  | 0.984775000  |
| 6 | 2.530635000  | 1.743971000  | 0.723706000  |
| 6 | 2.759388000  | -0.657037000 | 0.388970000  |

|    |               |              |              |
|----|---------------|--------------|--------------|
| 6  | 3.878700000   | 1.946473000  | 0.574987000  |
| 6  | 4.113341000   | -0.465625000 | 0.232076000  |
| 1  | 2.340724000   | -1.650637000 | 0.337107000  |
| 6  | 4.723912000   | 0.821576000  | 0.325983000  |
| 1  | 4.289206000   | 2.946683000  | 0.639248000  |
| 1  | 4.736361000   | -1.332691000 | 0.034511000  |
| 8  | -0.738722000  | 2.734927000  | 1.176037000  |
| 8  | 0.695117000   | -2.387208000 | 1.399969000  |
| 7  | 1.551080000   | 2.696818000  | 0.939268000  |
| 7  | -1.593134000  | -2.379907000 | 1.157584000  |
| 6  | -1.800451000  | -3.785899000 | 1.429542000  |
| 1  | -2.443241000  | -3.924456000 | 2.305584000  |
| 1  | -2.256281000  | -4.289754000 | 0.569972000  |
| 1  | -0.822027000  | -4.224236000 | 1.627755000  |
| 6  | 1.757303000   | 4.120289000  | 1.090765000  |
| 1  | 2.399203000   | 4.334587000  | 1.952428000  |
| 1  | 2.212321000   | 4.550871000  | 0.191496000  |
| 1  | 0.777719000   | 4.571789000  | 1.250580000  |
| 6  | -6.174792000  | -0.756094000 | 0.256262000  |
| 6  | -6.920923000  | -1.936711000 | 0.426241000  |
| 16 | -7.263678000  | 0.563870000  | -0.187147000 |
| 6  | -8.282305000  | -1.797779000 | 0.214555000  |
| 1  | -6.465150000  | -2.879253000 | 0.703162000  |
| 6  | -8.677667000  | -0.489377000 | -0.135296000 |
| 1  | -8.993799000  | -2.610090000 | 0.305847000  |
| 6  | 6.123625000   | 0.989503000  | 0.173242000  |
| 6  | 6.876314000   | 2.189810000  | 0.238757000  |
| 16 | 7.208347000   | -0.368375000 | -0.143440000 |
| 6  | 8.228364000   | 2.034617000  | 0.047429000  |
| 1  | 6.415951000   | 3.151263000  | 0.426156000  |
| 6  | 8.632242000   | 0.689415000  | -0.182654000 |
| 1  | 8.934988000   | 2.856711000  | 0.068052000  |
| 6  | -9.970801000  | -0.025547000 | -0.413075000 |
| 6  | -10.375008000 | 1.283833000  | -0.763387000 |
| 16 | -11.409328000 | -1.048299000 | -0.375393000 |
| 1  | -9.673208000  | 2.108371000  | -0.854852000 |
| 6  | -12.386648000 | 0.374152000  | -0.829039000 |
| 6  | -13.769218000 | 0.305553000  | -1.000552000 |
| 6  | -14.461077000 | -0.920569000 | -0.817083000 |
| 7  | -15.001696000 | -1.942717000 | -0.659451000 |
| 6  | -14.516395000 | 1.459514000  | -1.362923000 |
| 7  | -15.157955000 | 2.386428000  | -1.659804000 |
| 7  | -11.659310000 | 1.503281000  | -0.986114000 |
| 6  | 9.908863000   | 0.216454000  | -0.405825000 |

|    |              |              |              |
|----|--------------|--------------|--------------|
| 16 | 11.314020000 | 1.280271000  | -0.439972000 |
| 16 | 10.261368000 | -1.484241000 | -0.676548000 |
| 6  | 12.505230000 | 0.013700000  | -0.756905000 |
| 6  | 12.008090000 | -1.293025000 | -0.868696000 |
| 6  | 13.873016000 | 0.263092000  | -0.894309000 |
| 6  | 12.874142000 | -2.360320000 | -1.118588000 |
| 6  | 14.733505000 | -0.804279000 | -1.143561000 |
| 1  | 14.258153000 | 1.273922000  | -0.807892000 |
| 6  | 14.237616000 | -2.107183000 | -1.254957000 |
| 1  | 12.488762000 | -3.371063000 | -1.204868000 |
| 1  | 15.796849000 | -0.617429000 | -1.251316000 |
| 1  | 14.916036000 | -2.931319000 | -1.449118000 |

**S9TIIDTS4-CS** E=-3879.954632 Hartree

|   |              |              |              |
|---|--------------|--------------|--------------|
| 6 | 3.040814000  | -1.608872000 | -0.869689000 |
| 6 | 2.429250000  | -0.307742000 | -0.720808000 |
| 6 | 3.289195000  | 0.768302000  | -0.356962000 |
| 6 | 4.629758000  | 0.548647000  | -0.177677000 |
| 6 | 5.233845000  | -0.744592000 | -0.343993000 |
| 6 | 4.377080000  | -1.839181000 | -0.699272000 |
| 6 | 0.806721000  | -1.903196000 | -1.219929000 |
| 6 | 1.039567000  | -0.445893000 | -0.918654000 |
| 1 | 2.878108000  | 1.761609000  | -0.251788000 |
| 1 | 5.261421000  | 1.387985000  | 0.094515000  |
| 1 | 4.779227000  | -2.837367000 | -0.821302000 |
| 6 | -0.006835000 | 0.517041000  | -0.913819000 |
| 6 | -1.403957000 | 0.367836000  | -0.743090000 |
| 6 | 0.229290000  | 1.976545000  | -1.158730000 |
| 6 | -2.013972000 | 1.672128000  | -0.861057000 |
| 6 | -2.265684000 | -0.718327000 | -0.427970000 |
| 6 | -3.355694000 | 1.893988000  | -0.709653000 |
| 6 | -3.612301000 | -0.506112000 | -0.269169000 |
| 1 | -1.855867000 | -1.713958000 | -0.343689000 |
| 6 | -4.214080000 | 0.786977000  | -0.407864000 |
| 1 | -3.757494000 | 2.894920000  | -0.810038000 |
| 1 | -4.245178000 | -1.356614000 | -0.034076000 |
| 8 | 1.269060000  | 2.583997000  | -1.387063000 |
| 8 | -0.231077000 | -2.495266000 | -1.489477000 |
| 7 | -1.022006000 | 2.598999000  | -1.124708000 |
| 7 | 2.052599000  | -2.527908000 | -1.181275000 |
| 6 | 2.241211000  | -3.938591000 | -1.435798000 |
| 1 | 2.906316000  | -4.097988000 | -2.291775000 |
| 1 | 2.662438000  | -4.444979000 | -0.559834000 |

|    |               |              |              |
|----|---------------|--------------|--------------|
| 1  | 1.260195000   | -4.359458000 | -1.658757000 |
| 6  | -1.205104000  | 4.017162000  | -1.335339000 |
| 1  | -1.851363000  | 4.206996000  | -2.199775000 |
| 1  | -1.644301000  | 4.494918000  | -0.451908000 |
| 1  | -0.218900000  | 4.443422000  | -1.522745000 |
| 6  | 6.617628000   | -0.936023000 | -0.159927000 |
| 6  | 7.351938000   | -2.145062000 | -0.299512000 |
| 16 | 7.712028000   | 0.382792000  | 0.301928000  |
| 6  | 8.695201000   | -2.027523000 | -0.054783000 |
| 1  | 6.886259000   | -3.082047000 | -0.579100000 |
| 6  | 9.108890000   | -0.704699000 | 0.297313000  |
| 1  | 9.399522000   | -2.849038000 | -0.116935000 |
| 6  | -5.602976000  | 0.973412000  | -0.249489000 |
| 6  | -6.347717000  | 2.180723000  | -0.356671000 |
| 16 | -6.704579000  | -0.360222000 | 0.133576000  |
| 6  | -7.696206000  | 2.050111000  | -0.147458000 |
| 1  | -5.878035000  | 3.128248000  | -0.587630000 |
| 6  | -8.117351000  | 0.717481000  | 0.142148000  |
| 1  | -8.393981000  | 2.878666000  | -0.195299000 |
| 6  | 10.386259000  | -0.288078000 | 0.596448000  |
| 6  | 10.727836000  | 1.084848000  | 0.948211000  |
| 16 | 11.817173000  | -1.332189000 | 0.605904000  |
| 6  | 12.876429000  | 0.064152000  | 1.079634000  |
| 7  | 12.105775000  | 1.203051000  | 1.198654000  |
| 6  | 12.718446000  | 2.472212000  | 1.571769000  |
| 1  | 13.474212000  | 2.757059000  | 0.836096000  |
| 1  | 11.921922000  | 3.215097000  | 1.601613000  |
| 1  | 13.194291000  | 2.387896000  | 2.551571000  |
| 8  | 14.069882000  | -0.013362000 | 1.258317000  |
| 8  | 9.946113000   | 2.027498000  | 1.023902000  |
| 6  | -9.393475000  | 0.273363000  | 0.394853000  |
| 16 | -10.789520000 | 1.357852000  | 0.398373000  |
| 16 | -9.768145000  | -1.414007000 | 0.739319000  |
| 6  | -11.992334000 | 0.118511000  | 0.776555000  |
| 6  | -11.510848000 | -1.189097000 | 0.937402000  |
| 6  | -13.355625000 | 0.389963000  | 0.915115000  |
| 6  | -12.389177000 | -2.232909000 | 1.237613000  |
| 6  | -14.228708000 | -0.654532000 | 1.214768000  |
| 1  | -13.728347000 | 1.401579000  | 0.790658000  |
| 6  | -13.748712000 | -1.957721000 | 1.375024000  |
| 1  | -12.015729000 | -3.244290000 | 1.361717000  |
| 1  | -15.288592000 | -0.448868000 | 1.323384000  |
| 1  | -14.435431000 | -2.764843000 | 1.608144000  |



S9TIIDTS5-CS E=-3651.421736 Hartree

|    |              |              |              |
|----|--------------|--------------|--------------|
| 6  | -2.653770000 | -1.603904000 | 0.868469000  |
| 6  | -2.046724000 | -0.302197000 | 0.733054000  |
| 6  | -2.911233000 | 0.778203000  | 0.401175000  |
| 6  | -4.256067000 | 0.560815000  | 0.238735000  |
| 6  | -4.854056000 | -0.733843000 | 0.393141000  |
| 6  | -3.994266000 | -1.832018000 | 0.715403000  |
| 6  | -0.417381000 | -1.915101000 | 1.174523000  |
| 6  | -0.649689000 | -0.445386000 | 0.903871000  |
| 1  | -2.502726000 | 1.773147000  | 0.304323000  |
| 1  | -4.891941000 | 1.403886000  | -0.009426000 |
| 1  | -4.394999000 | -2.831952000 | 0.825923000  |
| 6  | 0.396694000  | 0.508515000  | 0.901248000  |
| 6  | 1.799913000  | 0.355543000  | 0.730166000  |
| 6  | 0.166862000  | 1.970667000  | 1.148642000  |
| 6  | 2.409118000  | 1.657086000  | 0.853892000  |
| 6  | 2.657861000  | -0.727913000 | 0.407779000  |
| 6  | 3.753060000  | 1.878170000  | 0.704778000  |
| 6  | 4.006958000  | -0.516501000 | 0.250406000  |
| 1  | 2.247766000  | -1.722294000 | 0.314773000  |
| 6  | 4.607582000  | 0.772708000  | 0.398250000  |
| 1  | 4.155482000  | 2.878067000  | 0.811420000  |
| 1  | 4.637367000  | -1.367037000 | 0.009115000  |
| 8  | -0.869611000 | 2.581680000  | 1.377315000  |
| 8  | 0.623042000  | -2.512030000 | 1.416606000  |
| 7  | 1.420592000  | 2.586367000  | 1.120556000  |
| 7  | -1.663541000 | -2.532821000 | 1.146851000  |
| 6  | -1.855273000 | -3.947970000 | 1.379302000  |
| 1  | -2.507510000 | -4.117917000 | 2.242734000  |
| 1  | -2.293126000 | -4.435171000 | 0.500983000  |
| 1  | -0.873629000 | -4.378454000 | 1.579079000  |
| 6  | 1.609776000  | 4.003666000  | 1.336727000  |
| 1  | 2.254872000  | 4.186592000  | 2.203295000  |
| 1  | 2.052673000  | 4.481741000  | 0.455534000  |
| 1  | 0.625422000  | 4.434075000  | 1.523645000  |
| 6  | -6.247427000 | -0.925961000 | 0.226999000  |
| 6  | -6.975265000 | -2.129947000 | 0.361300000  |
| 16 | -7.345120000 | 0.397533000  | -0.201433000 |
| 6  | -8.327127000 | -1.997994000 | 0.134759000  |
| 1  | -6.515088000 | -3.075237000 | 0.622255000  |
| 6  | -8.736862000 | -0.676159000 | -0.192367000 |
| 1  | -9.021746000 | -2.825813000 | 0.199518000  |
| 6  | 6.001299000  | 0.959327000  | 0.242514000  |

|    |               |              |              |
|----|---------------|--------------|--------------|
| 6  | 6.744674000   | 2.164358000  | 0.356897000  |
| 16 | 7.097716000   | -0.372215000 | -0.144791000 |
| 6  | 8.094882000   | 2.031550000  | 0.148134000  |
| 1  | 6.276439000   | 3.111457000  | 0.591737000  |
| 6  | 8.511187000   | 0.701485000  | -0.146885000 |
| 1  | 8.793844000   | 2.858809000  | 0.200681000  |
| 6  | -10.048532000 | -0.243289000 | -0.475396000 |
| 6  | -11.155180000 | -1.124880000 | -0.463203000 |
| 6  | -10.285542000 | 1.169504000  | -0.795814000 |
| 6  | -12.431469000 | -0.699423000 | -0.739919000 |
| 1  | -11.005545000 | -2.173186000 | -0.229608000 |
| 6  | -12.719692000 | 0.705086000  | -1.065734000 |
| 6  | -13.525115000 | -1.612174000 | -0.720183000 |
| 7  | -14.388683000 | -2.393190000 | -0.692747000 |
| 8  | -9.378116000  | 2.005658000  | -0.829762000 |
| 8  | -13.842606000 | 1.121916000  | -1.317781000 |
| 7  | -11.597275000 | 1.557898000  | -1.069400000 |
| 6  | -11.804042000 | 2.974652000  | -1.385220000 |
| 1  | -11.472144000 | 3.593143000  | -0.548568000 |
| 1  | -11.217391000 | 3.247852000  | -2.264941000 |
| 1  | -12.865601000 | 3.116729000  | -1.571423000 |
| 6  | 9.789353000   | 0.253922000  | -0.401375000 |
| 16 | 11.184466000  | 1.333266000  | -0.397819000 |
| 16 | 10.157543000  | -1.429531000 | -0.753278000 |
| 6  | 12.385501000  | 0.094612000  | -0.782125000 |
| 6  | 11.900739000  | -1.210684000 | -0.950039000 |
| 6  | 13.749474000  | 0.364249000  | -0.918608000 |
| 6  | 12.775570000  | -2.256045000 | -1.255542000 |
| 6  | 14.618877000  | -0.681362000 | -1.223444000 |
| 1  | 14.125008000  | 1.374063000  | -0.788763000 |
| 6  | 14.135357000  | -1.982804000 | -1.390817000 |
| 1  | 12.399703000  | -3.265751000 | -1.385205000 |
| 1  | 15.679337000  | -0.478458000 | -1.330751000 |
| 1  | 14.820369000  | -2.790078000 | -1.628002000 |

**S9TIIDTS6-CS** E=-4012.743789 Hartree

|   |              |              |             |
|---|--------------|--------------|-------------|
| 6 | -2.272872000 | -1.659442000 | 0.905386000 |
| 6 | -1.671025000 | -0.350891000 | 0.792924000 |
| 6 | -2.541542000 | 0.732947000  | 0.480277000 |
| 6 | -3.883447000 | 0.512404000  | 0.313595000 |
| 6 | -4.477395000 | -0.790111000 | 0.443886000 |
| 6 | -3.610708000 | -1.891085000 | 0.747643000 |
| 6 | -0.034702000 | -1.960404000 | 1.208454000 |

|    |               |              |              |
|----|---------------|--------------|--------------|
| 6  | -0.277086000  | -0.488869000 | 0.961771000  |
| 1  | -2.136809000  | 1.731249000  | 0.402621000  |
| 1  | -4.524414000  | 1.355761000  | 0.080350000  |
| 1  | -4.008012000  | -2.894099000 | 0.840155000  |
| 6  | 0.765064000   | 0.473861000  | 0.974963000  |
| 6  | 2.164049000   | 0.333328000  | 0.785679000  |
| 6  | 0.528290000   | 1.925893000  | 1.264006000  |
| 6  | 2.769305000   | 1.635207000  | 0.937269000  |
| 6  | 3.024337000   | -0.738347000 | 0.426907000  |
| 6  | 4.109881000   | 1.866183000  | 0.779992000  |
| 6  | 4.369711000   | -0.516421000 | 0.261373000  |
| 1  | 2.617603000   | -1.732137000 | 0.313506000  |
| 6  | 4.966942000   | 0.772531000  | 0.435805000  |
| 1  | 4.509175000   | 2.864883000  | 0.907838000  |
| 1  | 5.002048000   | -1.357126000 | -0.007797000 |
| 8  | -0.510008000  | 2.523566000  | 1.519313000  |
| 8  | 1.010173000   | -2.553314000 | 1.441140000  |
| 7  | 1.778279000   | 2.550903000  | 1.238433000  |
| 7  | -1.276879000  | -2.586386000 | 1.168558000  |
| 6  | -1.459703000  | -4.006377000 | 1.377251000  |
| 1  | -2.111566000  | -4.194904000 | 2.237098000  |
| 1  | -1.893935000  | -4.481664000 | 0.490662000  |
| 1  | -0.475381000  | -4.433745000 | 1.570612000  |
| 6  | 1.960720000   | 3.963015000  | 1.490060000  |
| 1  | 2.614171000   | 4.127592000  | 2.354104000  |
| 1  | 2.390752000   | 4.467500000  | 0.617194000  |
| 1  | 0.975603000   | 4.381509000  | 1.698999000  |
| 6  | -5.864980000  | -0.985213000 | 0.273060000  |
| 6  | -6.588494000  | -2.198009000 | 0.381451000  |
| 16 | -6.970035000  | 0.341546000  | -0.128740000 |
| 6  | -7.938533000  | -2.076759000 | 0.157936000  |
| 1  | -6.121047000  | -3.145179000 | 0.622932000  |
| 6  | -8.359477000  | -0.744667000 | -0.143595000 |
| 1  | -8.655033000  | -2.882696000 | 0.195516000  |
| 6  | 6.356117000   | 0.969125000  | 0.269816000  |
| 6  | 7.096215000   | 2.175026000  | 0.408098000  |
| 16 | 7.455457000   | -0.346543000 | -0.165664000 |
| 6  | 8.443705000   | 2.054837000  | 0.180855000  |
| 1  | 6.626065000   | 3.113028000  | 0.673707000  |
| 6  | 8.863951000   | 0.734645000  | -0.154809000 |
| 1  | 9.139404000   | 2.883824000  | 0.247786000  |
| 6  | -9.665463000  | -0.300958000 | -0.419646000 |
| 6  | -10.788675000 | -1.227946000 | -0.424360000 |
| 6  | -9.880498000  | 1.103730000  | -0.702209000 |

|    |               |              |              |
|----|---------------|--------------|--------------|
| 6  | -12.295107000 | 0.671990000  | -0.988000000 |
| 8  | -8.964090000  | 1.930189000  | -0.712836000 |
| 7  | -11.202094000 | 1.516939000  | -0.972910000 |
| 6  | -11.404105000 | 2.945334000  | -1.255547000 |
| 1  | -12.095933000 | 3.372555000  | -0.528056000 |
| 1  | -10.430691000 | 3.423605000  | -1.191915000 |
| 1  | -11.834022000 | 3.069088000  | -2.250701000 |
| 7  | -12.059761000 | -0.661725000 | -0.716300000 |
| 6  | -13.201466000 | -1.588381000 | -0.724249000 |
| 1  | -13.938282000 | -1.274659000 | 0.016832000  |
| 1  | -13.678635000 | -1.579784000 | -1.705457000 |
| 1  | -12.812798000 | -2.575255000 | -0.490789000 |
| 8  | -10.709211000 | -2.434240000 | -0.198782000 |
| 16 | -13.837728000 | 1.244797000  | -1.322306000 |
| 6  | 10.140367000  | 0.301732000  | -0.435592000 |
| 16 | 11.530943000  | 1.388685000  | -0.419177000 |
| 16 | 10.513848000  | -1.370488000 | -0.837319000 |
| 6  | 12.733465000  | 0.166890000  | -0.850638000 |
| 6  | 12.253551000  | -1.136074000 | -1.048089000 |
| 6  | 14.094329000  | 0.447359000  | -0.995594000 |
| 6  | 13.130376000  | -2.167769000 | -1.391744000 |
| 6  | 14.965820000  | -0.584745000 | -1.338559000 |
| 1  | 14.466043000  | 1.455408000  | -0.842877000 |
| 6  | 14.487194000  | -1.883746000 | -1.535368000 |
| 1  | 12.758213000  | -3.175679000 | -1.544233000 |
| 1  | 16.023878000  | -0.373022000 | -1.452553000 |
| 1  | 15.173465000  | -2.680677000 | -1.802135000 |

**S9TIIDTS7-CS** E=-3766.673474 Hartree

|   |              |              |              |
|---|--------------|--------------|--------------|
| 6 | 2.077348000  | -1.678136000 | -1.203659000 |
| 6 | 1.494868000  | -0.376202000 | -0.983757000 |
| 6 | 2.386673000  | 0.675401000  | -0.630514000 |
| 6 | 3.731743000  | 0.430855000  | -0.519524000 |
| 6 | 4.302809000  | -0.864164000 | -0.752057000 |
| 6 | 3.417704000  | -1.933084000 | -1.103491000 |
| 6 | -0.171875000 | -1.941998000 | -1.453059000 |
| 6 | 0.091545000  | -0.491458000 | -1.116415000 |
| 1 | 1.998142000  | 1.671841000  | -0.481141000 |
| 1 | 4.390426000  | 1.254721000  | -0.265673000 |
| 1 | 3.799507000  | -2.933027000 | -1.267325000 |
| 6 | -0.940402000 | 0.475210000  | -1.030606000 |
| 6 | -2.338678000 | 0.332220000  | -0.820414000 |

|    |              |              |              |
|----|--------------|--------------|--------------|
| 6  | -0.697067000 | 1.945059000  | -1.210818000 |
| 6  | -2.932681000 | 1.646553000  | -0.857462000 |
| 6  | -3.201902000 | -0.755180000 | -0.524883000 |
| 6  | -4.267497000 | 1.877081000  | -0.652705000 |
| 6  | -4.541622000 | -0.534557000 | -0.312190000 |
| 1  | -2.803630000 | -1.758271000 | -0.496220000 |
| 6  | -5.128030000 | 0.768511000  | -0.374415000 |
| 1  | -4.658437000 | 2.886272000  | -0.695277000 |
| 1  | -5.176388000 | -1.387934000 | -0.093362000 |
| 8  | 0.340215000  | 2.553222000  | -1.442151000 |
| 8  | -1.228522000 | -2.511318000 | -1.691636000 |
| 7  | -1.939976000 | 2.575120000  | -1.109409000 |
| 7  | 1.064634000  | -2.577982000 | -1.495198000 |
| 6  | 1.227488000  | -3.981762000 | -1.805756000 |
| 1  | 1.851210000  | -4.115569000 | -2.696142000 |
| 1  | 1.683723000  | -4.519814000 | -0.967383000 |
| 1  | 0.233787000  | -4.387587000 | -1.997356000 |
| 6  | -2.114749000 | 4.004026000  | -1.247375000 |
| 1  | -2.785777000 | 4.239299000  | -2.080980000 |
| 1  | -2.520395000 | 4.442683000  | -0.328539000 |
| 1  | -1.130820000 | 4.430076000  | -1.446199000 |
| 6  | 5.693269000  | -1.092262000 | -0.627336000 |
| 6  | 6.414046000  | -2.278855000 | -0.901861000 |
| 16 | 6.811272000  | 0.158930000  | -0.086053000 |
| 6  | 7.769310000  | -2.190260000 | -0.686452000 |
| 1  | 5.936528000  | -3.179056000 | -1.269003000 |
| 6  | 8.203553000  | -0.909971000 | -0.227601000 |
| 1  | 8.478902000  | -2.992160000 | -0.829350000 |
| 6  | -6.512507000 | 0.964870000  | -0.163452000 |
| 6  | -7.241439000 | 2.184121000  | -0.190933000 |
| 16 | -7.616121000 | -0.370601000 | 0.190564000  |
| 6  | -8.585787000 | 2.058715000  | 0.055040000  |
| 1  | -6.766783000 | 3.135830000  | -0.391850000 |
| 6  | -9.012642000 | 0.720473000  | 0.294626000  |
| 1  | -9.273618000 | 2.896796000  | 0.068293000  |
| 6  | 9.508366000  | -0.603595000 | 0.191189000  |
| 6  | 10.472424000 | -1.696370000 | 0.523590000  |
| 6  | 10.106275000 | 0.645747000  | 0.603730000  |
| 6  | 11.548674000 | -1.061361000 | 1.325839000  |
| 6  | 11.312153000 | 0.320770000  | 1.420960000  |
| 6  | 12.635257000 | -1.675790000 | 1.929877000  |
| 6  | 12.190751000 | 1.112969000  | 2.163772000  |
| 6  | 13.510222000 | -0.880143000 | 2.675047000  |
| 1  | 12.781755000 | -2.745325000 | 1.817309000  |

|    |               |              |              |
|----|---------------|--------------|--------------|
| 6  | 13.280465000  | 0.494357000  | 2.790037000  |
| 1  | 12.047736000  | 2.179281000  | 2.273876000  |
| 1  | 14.368302000  | -1.326952000 | 3.168075000  |
| 1  | 13.961556000  | 1.103098000  | 3.377214000  |
| 8  | 10.408003000  | -2.888242000 | 0.246389000  |
| 6  | 9.760529000   | 1.935115000  | 0.207176000  |
| 6  | 8.911665000   | 2.223778000  | -0.901293000 |
| 7  | 8.273682000   | 2.512299000  | -1.833560000 |
| 6  | 10.348252000  | 3.105036000  | 0.776506000  |
| 7  | 10.791022000  | 4.082659000  | 1.232394000  |
| 6  | -10.288202000 | 0.277689000  | 0.567344000  |
| 16 | -11.666634000 | 1.374687000  | 0.665803000  |
| 16 | -10.670784000 | -1.417208000 | 0.843249000  |
| 6  | -12.873249000 | 0.133680000  | 1.024351000  |
| 6  | -12.403270000 | -1.185093000 | 1.108111000  |
| 6  | -14.227893000 | 0.414055000  | 1.219399000  |
| 6  | -13.283794000 | -2.233011000 | 1.387286000  |
| 6  | -15.103037000 | -0.634205000 | 1.497769000  |
| 1  | -14.591948000 | 1.434301000  | 1.154635000  |
| 6  | -14.634300000 | -1.949015000 | 1.581159000  |
| 1  | -12.919344000 | -3.253125000 | 1.451786000  |
| 1  | -16.156300000 | -0.422810000 | 1.650205000  |
| 1  | -15.323531000 | -2.758351000 | 1.798299000  |

**S9TIIDTS8-CS** E=-4201.894063 Hartree

|   |              |              |              |
|---|--------------|--------------|--------------|
| 6 | -3.410355000 | 1.718708000  | -0.801271000 |
| 6 | -2.801885000 | 0.411561000  | -0.804945000 |
| 6 | -3.651246000 | -0.693599000 | -0.541986000 |
| 6 | -4.994199000 | -0.495246000 | -0.322318000 |
| 6 | -5.594834000 | 0.801313000  | -0.345389000 |
| 6 | -4.748370000 | 1.927413000  | -0.589487000 |
| 6 | -1.178913000 | 2.057208000  | -1.144382000 |
| 6 | -1.402962000 | 0.578321000  | -1.011181000 |
| 1 | -3.241498000 | -1.692331000 | -0.542820000 |
| 1 | -5.618198000 | -1.362537000 | -0.128783000 |
| 1 | -5.150917000 | 2.932820000  | -0.601626000 |
| 6 | -0.360394000 | -0.369963000 | -1.127734000 |
| 6 | 1.044689000  | -0.240149000 | -1.003380000 |
| 6 | -0.606918000 | -1.817497000 | -1.497258000 |
| 6 | 1.639844000  | -1.528256000 | -1.259523000 |
| 6 | 1.926010000  | 0.812264000  | -0.631007000 |
| 6 | 2.984715000  | -1.769718000 | -1.176134000 |
| 6 | 3.275584000  | 0.580806000  | -0.535837000 |

|    |              |              |              |
|----|--------------|--------------|--------------|
| 1  | 1.527469000  | 1.800044000  | -0.453876000 |
| 6  | 3.858230000  | -0.699908000 | -0.805368000 |
| 1  | 3.376761000  | -2.761344000 | -1.364268000 |
| 1  | 3.926184000  | 1.406500000  | -0.267545000 |
| 8  | -1.657853000 | -2.394217000 | -1.741660000 |
| 8  | -0.150055000 | 2.685819000  | -1.356132000 |
| 7  | 0.636725000  | -2.434711000 | -1.564571000 |
| 7  | -2.429647000 | 2.667187000  | -1.024264000 |
| 6  | -2.623026000 | 4.097570000  | -1.117373000 |
| 1  | -3.296912000 | 4.349861000  | -1.943588000 |
| 1  | -3.034377000 | 4.501505000  | -0.185315000 |
| 1  | -1.644823000 | 4.542565000  | -1.302207000 |
| 6  | 0.816546000  | -3.828853000 | -1.909450000 |
| 1  | 1.434830000  | -3.932423000 | -2.807495000 |
| 1  | 1.286991000  | -4.379360000 | -1.087343000 |
| 1  | -0.172742000 | -4.244270000 | -2.102921000 |
| 6  | -6.983203000 | 0.975388000  | -0.128697000 |
| 6  | -7.725125000 | 2.186004000  | -0.117454000 |
| 16 | -8.069909000 | -0.382870000 | 0.181334000  |
| 6  | -9.068612000 | 2.036735000  | 0.124062000  |
| 1  | -7.261609000 | 3.149149000  | -0.287199000 |
| 6  | -9.478676000 | 0.687251000  | 0.320057000  |
| 1  | -9.766139000 | 2.865893000  | 0.164214000  |
| 6  | 5.254972000  | -0.916036000 | -0.697238000 |
| 6  | 5.987946000  | -2.075779000 | -1.033605000 |
| 16 | 6.355073000  | 0.326373000  | -0.104508000 |
| 6  | 7.344958000  | -1.972768000 | -0.826623000 |
| 1  | 5.523563000  | -2.962293000 | -1.446961000 |
| 6  | 7.758567000  | -0.713223000 | -0.306379000 |
| 1  | 8.053809000  | -2.756295000 | -1.060807000 |
| 6  | 9.058952000  | -0.408705000 | 0.120015000  |
| 6  | 9.699883000  | 0.797911000  | 0.517155000  |
| 6  | 11.270734000 | -0.820553000 | 1.396671000  |
| 6  | 10.909655000 | 0.533821000  | 1.352472000  |
| 6  | 12.381249000 | -1.304037000 | 2.069946000  |
| 6  | 11.724205000 | 1.438855000  | 2.049556000  |
| 6  | 13.176586000 | -0.386211000 | 2.758156000  |
| 1  | 12.614516000 | -2.363564000 | 2.063091000  |
| 6  | 12.840183000 | 0.969512000  | 2.745371000  |
| 1  | 11.500615000 | 2.495711000  | 2.066770000  |
| 1  | 14.050877000 | -0.727261000 | 3.303395000  |
| 1  | 13.456266000 | 1.681044000  | 3.286303000  |
| 6  | 9.320094000  | 2.080774000  | 0.085795000  |
| 6  | 9.806594000  | 3.293223000  | 0.651917000  |

|    |               |              |              |
|----|---------------|--------------|--------------|
| 7  | 10.160946000  | 4.312285000  | 1.096877000  |
| 6  | 8.498820000   | 2.294752000  | -1.055787000 |
| 7  | 7.866651000   | 2.513988000  | -2.011667000 |
| 16 | 10.123223000  | -1.829074000 | 0.484777000  |
| 8  | 9.448553000   | -2.773908000 | 1.390824000  |
| 8  | 10.739010000  | -2.368182000 | -0.741132000 |
| 6  | -10.749880000 | 0.219974000  | 0.578165000  |
| 16 | -12.140175000 | 1.295990000  | 0.711130000  |
| 16 | -11.111130000 | -1.486332000 | 0.799000000  |
| 6  | -13.332030000 | 0.030267000  | 1.029647000  |
| 6  | -12.846127000 | -1.284691000 | 1.071080000  |
| 6  | -14.689880000 | 0.288169000  | 1.233496000  |
| 6  | -13.713535000 | -2.351894000 | 1.316425000  |
| 6  | -15.551830000 | -0.779141000 | 1.478012000  |
| 1  | -15.066337000 | 1.305439000  | 1.201515000  |
| 6  | -15.067137000 | -2.090321000 | 1.519190000  |
| 1  | -13.336807000 | -3.369062000 | 1.348225000  |
| 1  | -16.607521000 | -0.585697000 | 1.637140000  |
| 1  | -15.746561000 | -2.914357000 | 1.710239000  |

**S9TIIDTS10-CS** E=-4034.170013 Hartree

|   |              |              |              |
|---|--------------|--------------|--------------|
| 6 | -3.572048000 | -1.453796000 | 0.869434000  |
| 6 | -2.936486000 | -0.172199000 | 0.658354000  |
| 6 | -3.772896000 | 0.892730000  | 0.218134000  |
| 6 | -5.114173000 | 0.682186000  | 0.026929000  |
| 6 | -5.741756000 | -0.588619000 | 0.253523000  |
| 6 | -4.908669000 | -1.674000000 | 0.686217000  |
| 6 | -1.345549000 | -1.750364000 | 1.281241000  |
| 6 | -1.552910000 | -0.318684000 | 0.893900000  |
| 1 | -3.344989000 | 1.872974000  | 0.066190000  |
| 1 | -5.726901000 | 1.515566000  | -0.303825000 |
| 1 | -5.328427000 | -2.657956000 | 0.857778000  |
| 6 | -0.491865000 | 0.634000000  | 0.849040000  |
| 6 | 0.900124000  | 0.460039000  | 0.699398000  |
| 6 | -0.711940000 | 2.106135000  | 1.017513000  |
| 6 | 1.529733000  | 1.760828000  | 0.753081000  |
| 6 | 1.752301000  | -0.654414000 | 0.454581000  |
| 6 | 2.873748000  | 1.957000000  | 0.600722000  |
| 6 | 3.101309000  | -0.469135000 | 0.296098000  |
| 1 | 1.328436000  | -1.647679000 | 0.425503000  |
| 6 | 3.722376000  | 0.823382000  | 0.366341000  |
| 1 | 3.288520000  | 2.956723000  | 0.648603000  |
| 1 | 3.725777000  | -1.339167000 | 0.116180000  |



|    |               |              |              |
|----|---------------|--------------|--------------|
| 8  | -1.746409000  | 2.738060000  | 1.206509000  |
| 8  | -0.322759000  | -2.345877000 | 1.604643000  |
| 7  | 0.546515000   | 2.712803000  | 0.958207000  |
| 7  | -2.602239000  | -2.363356000 | 1.252732000  |
| 6  | -2.810896000  | -3.753916000 | 1.582804000  |
| 1  | -3.493058000  | -3.860029000 | 2.434188000  |
| 1  | -3.221713000  | -4.306926000 | 0.729826000  |
| 1  | -1.837800000  | -4.169760000 | 1.847201000  |
| 6  | 0.744894000   | 4.136859000  | 1.095661000  |
| 1  | 1.388996000   | 4.365135000  | 1.952666000  |
| 1  | 1.195040000   | 4.563884000  | 0.191693000  |
| 1  | -0.237551000  | 4.583242000  | 1.254654000  |
| 6  | -7.122698000  | -0.773414000 | 0.056695000  |
| 6  | -7.891813000  | -1.956384000 | 0.242061000  |
| 16 | -8.192501000  | 0.533739000  | -0.493138000 |
| 6  | -9.228457000  | -1.831510000 | -0.033160000 |
| 1  | -7.446002000  | -2.884027000 | 0.578268000  |
| 6  | -9.620122000  | -0.525898000 | -0.461048000 |
| 1  | -9.939932000  | -2.644354000 | 0.061656000  |
| 6  | 5.110937000   | 0.982207000  | 0.208537000  |
| 6  | 5.874314000   | 2.183094000  | 0.256038000  |
| 16 | 6.201019000   | -0.386959000 | -0.095500000 |
| 6  | 7.221253000   | 2.025423000  | 0.064653000  |
| 1  | 5.415766000   | 3.147862000  | 0.432947000  |
| 6  | 7.629482000   | 0.671842000  | -0.150550000 |
| 1  | 7.929808000   | 2.846116000  | 0.073739000  |
| 6  | -10.876229000 | -0.092912000 | -0.805856000 |
| 16 | -11.225998000 | 1.564107000  | -1.322252000 |
| 16 | -12.302704000 | -1.148950000 | -0.773915000 |
| 6  | -12.947458000 | 1.306140000  | -1.560421000 |
| 6  | -13.432332000 | 0.083056000  | -1.313145000 |
| 1  | -14.470001000 | -0.207832000 | -1.419690000 |
| 1  | -13.534781000 | 2.151463000  | -1.896650000 |
| 6  | 8.898667000   | 0.200537000  | -0.368598000 |
| 16 | 10.312431000  | 1.268124000  | -0.420623000 |
| 16 | 9.257691000   | -1.511105000 | -0.619343000 |
| 6  | 11.501183000  | -0.006249000 | -0.719709000 |
| 6  | 11.004649000  | -1.315212000 | -0.813366000 |
| 6  | 12.868956000  | 0.239590000  | -0.860970000 |
| 6  | 11.873549000  | -2.383216000 | -1.048502000 |
| 6  | 13.732697000  | -0.829552000 | -1.095705000 |
| 1  | 13.252950000  | 1.252150000  | -0.788356000 |
| 6  | 13.238078000  | -2.133279000 | -1.188921000 |
| 1  | 11.488410000  | -3.395366000 | -1.120530000 |

|   |              |              |              |
|---|--------------|--------------|--------------|
| 1 | 14.795918000 | -0.642125000 | -1.205880000 |
| 1 | 13.916217000 | -2.960552000 | -1.371613000 |

**S9TIIDTS1-OS** E=-3346.081340 Hartree

|    |              |              |              |
|----|--------------|--------------|--------------|
| 6  | 0.796511000  | 1.747261000  | 0.508765000  |
| 6  | 0.181504000  | 0.454169000  | 0.464940000  |
| 6  | 1.039102000  | -0.653431000 | 0.289207000  |
| 6  | 2.405006000  | -0.466681000 | 0.189348000  |
| 6  | 3.006695000  | 0.818797000  | 0.257060000  |
| 6  | 2.153748000  | 1.947264000  | 0.416559000  |
| 6  | -1.448662000 | 2.136183000  | 0.644387000  |
| 6  | -1.245535000 | 0.640541000  | 0.540444000  |
| 1  | 0.624267000  | -1.649082000 | 0.256517000  |
| 1  | 3.034934000  | -1.341541000 | 0.061721000  |
| 1  | 2.560121000  | 2.950449000  | 0.455956000  |
| 6  | -2.304079000 | -0.273456000 | 0.566404000  |
| 6  | -3.725493000 | -0.101216000 | 0.384347000  |
| 6  | -2.114731000 | -1.743330000 | 0.866480000  |
| 6  | -4.346611000 | -1.380415000 | 0.554384000  |
| 6  | -4.564924000 | 0.972791000  | 0.019801000  |
| 6  | -5.697591000 | -1.594452000 | 0.408490000  |
| 6  | -5.924161000 | 0.770956000  | -0.136618000 |
| 1  | -4.144922000 | 1.957768000  | -0.113347000 |
| 6  | -6.532995000 | -0.497778000 | 0.057587000  |
| 1  | -6.110669000 | -2.585700000 | 0.548590000  |
| 1  | -6.541701000 | 1.620654000  | -0.409794000 |
| 8  | -1.095022000 | -2.370499000 | 1.122786000  |
| 8  | -2.479689000 | 2.784898000  | 0.762866000  |
| 7  | -3.376866000 | -2.324707000 | 0.857325000  |
| 7  | -0.186772000 | 2.717767000  | 0.634310000  |
| 6  | 0.027944000  | 4.144751000  | 0.736728000  |
| 1  | 0.632082000  | 4.387298000  | 1.617828000  |
| 1  | 0.530131000  | 4.531947000  | -0.156956000 |
| 1  | -0.952088000 | 4.612953000  | 0.831507000  |
| 6  | -3.604815000 | -3.728237000 | 1.124734000  |
| 1  | -4.259915000 | -3.859650000 | 1.992819000  |
| 1  | -4.057012000 | -4.224980000 | 0.259024000  |
| 1  | -2.634379000 | -4.179004000 | 1.333643000  |
| 6  | 4.425411000  | 0.988231000  | 0.164117000  |
| 6  | 5.171988000  | 2.179385000  | 0.227678000  |
| 16 | 5.517400000  | -0.382584000 | -0.061010000 |
| 6  | 6.540141000  | 2.016420000  | 0.104074000  |
| 1  | 4.708780000  | 3.148392000  | 0.365581000  |

|    |               |              |              |
|----|---------------|--------------|--------------|
| 6  | 6.944827000   | 0.667934000  | -0.065293000 |
| 1  | 7.247640000   | 2.837145000  | 0.133688000  |
| 6  | -7.946685000  | -0.681564000 | -0.098467000 |
| 6  | -8.699007000  | -1.855429000 | 0.083230000  |
| 16 | -9.013475000  | 0.642677000  | -0.577400000 |
| 6  | -10.057549000 | -1.712141000 | -0.146466000 |
| 1  | -8.251564000  | -2.795003000 | 0.382845000  |
| 6  | -10.427553000 | -0.399422000 | -0.523328000 |
| 1  | -10.787167000 | -2.507353000 | -0.053446000 |
| 6  | -11.718980000 | 0.063159000  | -0.823493000 |
| 6  | -12.822435000 | -0.829664000 | -0.763234000 |
| 7  | -13.710887000 | -1.583795000 | -0.706236000 |
| 6  | -11.963066000 | 1.411554000  | -1.191282000 |
| 7  | -12.140055000 | 2.525265000  | -1.491937000 |
| 6  | 8.231537000   | 0.177296000  | -0.215663000 |
| 16 | 9.643977000   | 1.236848000  | -0.218505000 |
| 16 | 8.586230000   | -1.535965000 | -0.417469000 |
| 6  | 10.839915000  | -0.046336000 | -0.440583000 |
| 6  | 10.341349000  | -1.354250000 | -0.534528000 |
| 6  | 12.214065000  | 0.191835000  | -0.522631000 |
| 6  | 11.213384000  | -2.431219000 | -0.711007000 |
| 6  | 13.080602000  | -0.885562000 | -0.698741000 |
| 1  | 12.599978000  | 1.203553000  | -0.449929000 |
| 6  | 12.583523000  | -2.188958000 | -0.792364000 |
| 1  | 10.826765000  | -3.442670000 | -0.783520000 |
| 1  | 14.148763000  | -0.705720000 | -0.763048000 |
| 1  | 13.265316000  | -3.021882000 | -0.929398000 |

**S9TIIDTS3-OS** E=-3913.937971 Hartree

|   |              |              |              |
|---|--------------|--------------|--------------|
| 6 | -2.584028000 | -1.449318000 | 0.616714000  |
| 6 | -1.985473000 | -0.164974000 | 0.442096000  |
| 6 | -2.845207000 | 0.899874000  | 0.116747000  |
| 6 | -4.210871000 | 0.682999000  | 0.000311000  |
| 6 | -4.792894000 | -0.589742000 | 0.198933000  |
| 6 | -3.940311000 | -1.677331000 | 0.511775000  |
| 6 | -0.341193000 | -1.798041000 | 0.865831000  |
| 6 | -0.548129000 | -0.325957000 | 0.585446000  |
| 1 | -2.441283000 | 1.889925000  | -0.025762000 |
| 1 | -4.843939000 | 1.524461000  | -0.263108000 |
| 1 | -4.341916000 | -2.669248000 | 0.679569000  |
| 6 | 0.498477000  | 0.591997000  | 0.539820000  |
| 6 | 1.933478000  | 0.419723000  | 0.457639000  |
| 6 | 0.284143000  | 2.091146000  | 0.622392000  |

|    |               |              |              |
|----|---------------|--------------|--------------|
| 6  | 2.532003000   | 1.718097000  | 0.481166000  |
| 6  | 2.802865000   | -0.677613000 | 0.292660000  |
| 6  | 3.887138000   | 1.934640000  | 0.379343000  |
| 6  | 4.167983000   | -0.475316000 | 0.183236000  |
| 1  | 2.400796000   | -1.678591000 | 0.273693000  |
| 6  | 4.752627000   | 0.816241000  | 0.230771000  |
| 1  | 4.280456000   | 2.943513000  | 0.402089000  |
| 1  | 4.807364000   | -1.344618000 | 0.065411000  |
| 8  | -0.751130000  | 2.733607000  | 0.735230000  |
| 8  | 0.688483000   | -2.422453000 | 1.087305000  |
| 7  | 1.539246000   | 2.681840000  | 0.598188000  |
| 7  | -1.598491000  | -2.387790000 | 0.886902000  |
| 6  | -1.808530000  | -3.795517000 | 1.147054000  |
| 1  | -2.436231000  | -3.940155000 | 2.033110000  |
| 1  | -2.283452000  | -4.286651000 | 0.290361000  |
| 1  | -0.829243000  | -4.241439000 | 1.322050000  |
| 6  | 1.742926000   | 4.111985000  | 0.678912000  |
| 1  | 2.350354000   | 4.371397000  | 1.552848000  |
| 1  | 2.237224000   | 4.489815000  | -0.223085000 |
| 1  | 0.759992000   | 4.574096000  | 0.772634000  |
| 6  | -6.221816000  | -0.795869000 | 0.084260000  |
| 6  | -6.926471000  | -1.997695000 | 0.063185000  |
| 16 | -7.340689000  | 0.552505000  | -0.054430000 |
| 6  | -8.311708000  | -1.851127000 | -0.067948000 |
| 1  | -6.440886000  | -2.963778000 | 0.121060000  |
| 6  | -8.731809000  | -0.521938000 | -0.151608000 |
| 1  | -9.002716000  | -2.685229000 | -0.111516000 |
| 6  | 6.172471000   | 1.003947000  | 0.128484000  |
| 6  | 6.903870000   | 2.201475000  | 0.184147000  |
| 16 | 7.277508000   | -0.355066000 | -0.099277000 |
| 6  | 8.275504000   | 2.053667000  | 0.053157000  |
| 1  | 6.430994000   | 3.165750000  | 0.323163000  |
| 6  | 8.692850000   | 0.710477000  | -0.114250000 |
| 1  | 8.973821000   | 2.882322000  | 0.077119000  |
| 6  | -10.051827000 | -0.023667000 | -0.289840000 |
| 6  | -10.473678000 | 1.315455000  | -0.401907000 |
| 16 | -11.470545000 | -1.057284000 | -0.348192000 |
| 1  | -9.784744000  | 2.154540000  | -0.394435000 |
| 6  | -12.479566000 | 0.401651000  | -0.517713000 |
| 6  | -13.876118000 | 0.336972000  | -0.632078000 |
| 6  | -14.548967000 | -0.912088000 | -0.618004000 |
| 7  | -15.076185000 | -1.953119000 | -0.603565000 |
| 6  | -14.648528000 | 1.521462000  | -0.764755000 |
| 7  | -15.310900000 | 2.474513000  | -0.875103000 |

|    |               |              |              |
|----|---------------|--------------|--------------|
| 7  | -11.777312000 | 1.546582000  | -0.524548000 |
| 6  | 9.985187000   | 0.231329000  | -0.270751000 |
| 16 | 11.385599000  | 1.306212000  | -0.286287000 |
| 16 | 10.356516000  | -1.478765000 | -0.468221000 |
| 6  | 12.593887000  | 0.035010000  | -0.510075000 |
| 6  | 12.108843000  | -1.278620000 | -0.596074000 |
| 6  | 13.964963000  | 0.287441000  | -0.600996000 |
| 6  | 12.991461000  | -2.346829000 | -0.773415000 |
| 6  | 14.842023000  | -0.781252000 | -0.777936000 |
| 1  | 14.340399000  | 1.303518000  | -0.534427000 |
| 6  | 14.358427000  | -2.090265000 | -0.863635000 |
| 1  | 12.615317000  | -3.362649000 | -0.839755000 |
| 1  | 15.907809000  | -0.590228000 | -0.849100000 |
| 1  | 15.048324000  | -2.916378000 | -1.001375000 |

**S9TIIDTS4-OS** E=-3879.960008 Hartree

|   |              |              |              |
|---|--------------|--------------|--------------|
| 6 | 3.051618000  | -1.599313000 | -0.651840000 |
| 6 | 2.465205000  | -0.299443000 | -0.548753000 |
| 6 | 3.338695000  | 0.773172000  | -0.279064000 |
| 6 | 4.699137000  | 0.548388000  | -0.147513000 |
| 6 | 5.272409000  | -0.742649000 | -0.274853000 |
| 6 | 4.402353000  | -1.836816000 | -0.529366000 |
| 6 | 0.803382000  | -1.932325000 | -0.876751000 |
| 6 | 1.030981000  | -0.450657000 | -0.679967000 |
| 1 | 2.946016000  | 1.774904000  | -0.198595000 |
| 1 | 5.343619000  | 1.398961000  | 0.049527000  |
| 1 | 4.787170000  | -2.845824000 | -0.612704000 |
| 6 | -0.006289000 | 0.484184000  | -0.683051000 |
| 6 | -1.438780000 | 0.334915000  | -0.567051000 |
| 6 | 0.224974000  | 1.968124000  | -0.872887000 |
| 6 | -2.024994000 | 1.636298000  | -0.667782000 |
| 6 | -2.317254000 | -0.739308000 | -0.314339000 |
| 6 | -3.375477000 | 1.874433000  | -0.557652000 |
| 6 | -3.677420000 | -0.514485000 | -0.195887000 |
| 1 | -1.925031000 | -1.741513000 | -0.236057000 |
| 6 | -4.250613000 | 0.778321000  | -0.319618000 |
| 1 | -3.759080000 | 2.883801000  | -0.642971000 |
| 1 | -4.323979000 | -1.366110000 | -0.008261000 |
| 8 | 1.265739000  | 2.587852000  | -1.049831000 |
| 8 | -0.235556000 | -2.553826000 | -1.063000000 |
| 7 | -1.023411000 | 2.576737000  | -0.866779000 |
| 7 | 2.052655000  | -2.539490000 | -0.864556000 |
| 6 | 2.243446000  | -3.961661000 | -1.044906000 |

|    |               |              |              |
|----|---------------|--------------|--------------|
| 1  | 2.871155000   | -4.164625000 | -1.919623000 |
| 1  | 2.709979000   | -4.411417000 | -0.161104000 |
| 1  | 1.258196000   | -4.402937000 | -1.197426000 |
| 6  | -1.210620000  | 3.999951000  | -1.042758000 |
| 1  | -1.830036000  | 4.207567000  | -1.922303000 |
| 1  | -1.684420000  | 4.446458000  | -0.161200000 |
| 1  | -0.223451000  | 4.440577000  | -1.184445000 |
| 6  | 6.691427000   | -0.951077000 | -0.146661000 |
| 6  | 7.402714000   | -2.151530000 | -0.301739000 |
| 16 | 7.793959000   | 0.368326000  | 0.248752000  |
| 6  | 8.770835000   | -2.030241000 | -0.115480000 |
| 1  | 6.926362000   | -3.091069000 | -0.553123000 |
| 6  | 9.190504000   | -0.714561000 | 0.197399000  |
| 1  | 9.469755000   | -2.854448000 | -0.200374000 |
| 6  | -5.665003000  | 0.988047000  | -0.206129000 |
| 6  | -6.385100000  | 2.189369000  | -0.315711000 |
| 16 | -6.783299000  | -0.344185000 | 0.112504000  |
| 6  | -7.755579000  | 2.066140000  | -0.155628000 |
| 1  | -5.903369000  | 3.139099000  | -0.512993000 |
| 6  | -8.186888000  | 0.738562000  | 0.091370000  |
| 1  | -8.444720000  | 2.900838000  | -0.213209000 |
| 6  | 10.488282000  | -0.281005000 | 0.438660000  |
| 6  | 10.842649000  | 1.097321000  | 0.754387000  |
| 16 | 11.913011000  | -1.322771000 | 0.401544000  |
| 6  | 12.995552000  | 0.081700000  | 0.807805000  |
| 7  | 12.230563000  | 1.220955000  | 0.942859000  |
| 6  | 12.856976000  | 2.496724000  | 1.269807000  |
| 1  | 13.579084000  | 2.770994000  | 0.497344000  |
| 1  | 12.061409000  | 3.239250000  | 1.323280000  |
| 1  | 13.374925000  | 2.427446000  | 2.229126000  |
| 8  | 14.194853000  | 0.002554000  | 0.934246000  |
| 8  | 10.063331000  | 2.039890000  | 0.849826000  |
| 6  | -9.480447000  | 0.285276000  | 0.292907000  |
| 16 | -10.870556000 | 1.377408000  | 0.269745000  |
| 16 | -9.869743000  | -1.408811000 | 0.589826000  |
| 6  | -12.088999000 | 0.133917000  | 0.579548000  |
| 6  | -11.617680000 | -1.179012000 | 0.730479000  |
| 6  | -13.455717000 | 0.406861000  | 0.675635000  |
| 6  | -12.510302000 | -2.224618000 | 0.978045000  |
| 6  | -14.342916000 | -0.639596000 | 0.922825000  |
| 1  | -13.820370000 | 1.422393000  | 0.558844000  |
| 6  | -13.873162000 | -1.947531000 | 1.073151000  |
| 1  | -12.144685000 | -3.239829000 | 1.094485000  |
| 1  | -15.405314000 | -0.431671000 | 0.998124000  |

|   |               |              |             |
|---|---------------|--------------|-------------|
| 1 | -14.570130000 | -2.756749000 | 1.265324000 |
|---|---------------|--------------|-------------|

**S9TIIDTS5- OS** E=-3651.425280 Hartree

|    |              |              |              |
|----|--------------|--------------|--------------|
| 6  | -2.662250000 | -1.596119000 | 0.699035000  |
| 6  | -2.071260000 | -0.296187000 | 0.595209000  |
| 6  | -2.941921000 | 0.781357000  | 0.325507000  |
| 6  | -4.301069000 | 0.561598000  | 0.194859000  |
| 6  | -4.879588000 | -0.729839000 | 0.323257000  |
| 6  | -4.012777000 | -1.828113000 | 0.577950000  |
| 6  | -0.415963000 | -1.933342000 | 0.921801000  |
| 6  | -0.642138000 | -0.450061000 | 0.724152000  |
| 1  | -2.545084000 | 1.781502000  | 0.244939000  |
| 1  | -4.943466000 | 1.412987000  | -0.003849000 |
| 1  | -4.402450000 | -2.834933000 | 0.663513000  |
| 6  | 0.397725000  | 0.484618000  | 0.727746000  |
| 6  | 1.825613000  | 0.332539000  | 0.598692000  |
| 6  | 0.170424000  | 1.965787000  | 0.935661000  |
| 6  | 2.417456000  | 1.632311000  | 0.709490000  |
| 6  | 2.697491000  | -0.743398000 | 0.325556000  |
| 6  | 3.767562000  | 1.865469000  | 0.591500000  |
| 6  | 4.056257000  | -0.522777000 | 0.198880000  |
| 1  | 2.300242000  | -1.742977000 | 0.239145000  |
| 6  | 4.635705000  | 0.767387000  | 0.333741000  |
| 1  | 4.156375000  | 2.871933000  | 0.685912000  |
| 1  | 4.697889000  | -1.374441000 | -0.004785000 |
| 8  | -0.867877000 | 2.584440000  | 1.126868000  |
| 8  | 0.623200000  | -2.553524000 | 1.106870000  |
| 7  | 1.420922000  | 2.572210000  | 0.927262000  |
| 7  | -1.665912000 | -2.538423000 | 0.911435000  |
| 6  | -1.859926000 | -3.960694000 | 1.092687000  |
| 1  | -2.486590000 | -4.161237000 | 1.968490000  |
| 1  | -2.328623000 | -4.409058000 | 0.209539000  |
| 1  | -0.875728000 | -4.404573000 | 1.243989000  |
| 6  | 1.612383000  | 3.993486000  | 1.117489000  |
| 1  | 2.237874000  | 4.190095000  | 1.995142000  |
| 1  | 2.080486000  | 4.448470000  | 0.237340000  |
| 1  | 0.627125000  | 4.434408000  | 1.270856000  |
| 6  | -6.296567000 | -0.931661000 | 0.195350000  |
| 6  | -7.009085000 | -2.133444000 | 0.335930000  |
| 16 | -7.399320000 | 0.392448000  | -0.180386000 |
| 6  | -8.375561000 | -1.999858000 | 0.151852000  |
| 1  | -6.539699000 | -3.080321000 | 0.572662000  |
| 6  | -8.793070000 | -0.680566000 | -0.143282000 |

|    |               |              |              |
|----|---------------|--------------|--------------|
| 1  | -9.065255000  | -2.830972000 | 0.228823000  |
| 6  | 6.047937000   | 0.971144000  | 0.211696000  |
| 6  | 6.773337000   | 2.171497000  | 0.326820000  |
| 16 | 7.158101000   | -0.360709000 | -0.126238000 |
| 6  | 8.140161000   | 2.044183000  | 0.155572000  |
| 1  | 6.296038000   | 3.120749000  | 0.535556000  |
| 6  | 8.564807000   | 0.716967000  | -0.106340000 |
| 1  | 8.832663000   | 2.876012000  | 0.215086000  |
| 6  | -10.117715000 | -0.242936000 | -0.380875000 |
| 6  | -11.219940000 | -1.126423000 | -0.347514000 |
| 6  | -10.368338000 | 1.177510000  | -0.673703000 |
| 6  | -12.505753000 | -0.697287000 | -0.578167000 |
| 1  | -11.061895000 | -2.177736000 | -0.134909000 |
| 6  | -12.806415000 | 0.712727000  | -0.873580000 |
| 6  | -13.597906000 | -1.610372000 | -0.538516000 |
| 7  | -14.460537000 | -2.391699000 | -0.496296000 |
| 8  | -9.464050000  | 2.013839000  | -0.723394000 |
| 8  | -13.938459000 | 1.126926000  | -1.083024000 |
| 7  | -11.688049000 | 1.567816000  | -0.899986000 |
| 6  | -11.906660000 | 2.989462000  | -1.188129000 |
| 1  | -11.549284000 | 3.595398000  | -0.352968000 |
| 1  | -11.348633000 | 3.275958000  | -2.081957000 |
| 1  | -12.973626000 | 3.132931000  | -1.338509000 |
| 6  | 9.855820000   | 0.262261000  | -0.321279000 |
| 16 | 11.247374000  | 1.348019000  | -0.298131000 |
| 16 | 10.235981000  | -1.427740000 | -0.636061000 |
| 6  | 12.460318000  | 0.105007000  | -0.629155000 |
| 6  | 11.983496000  | -1.204633000 | -0.788688000 |
| 6  | 13.827046000  | 0.375266000  | -0.733227000 |
| 6  | 12.869806000  | -2.251552000 | -1.053094000 |
| 6  | 14.707851000  | -0.672140000 | -0.997145000 |
| 1  | 14.196208000  | 1.388309000  | -0.609829000 |
| 6  | 14.232390000  | -1.977342000 | -1.156099000 |
| 1  | 12.499984000  | -3.264376000 | -1.176222000 |
| 1  | 15.770326000  | -0.467495000 | -1.078908000 |
| 1  | 14.925366000  | -2.786678000 | -1.361312000 |

**S9TIIDTS6-OS** E=-4012.746559 Hartree

|   |              |              |             |
|---|--------------|--------------|-------------|
| 6 | -2.280556000 | -1.642484000 | 0.734482000 |
| 6 | -1.694788000 | -0.336920000 | 0.642068000 |
| 6 | -2.571468000 | 0.740088000  | 0.378779000 |
| 6 | -3.927024000 | 0.514906000  | 0.243206000 |
| 6 | -4.501945000 | -0.783122000 | 0.359636000 |



|    |              |              |              |
|----|--------------|--------------|--------------|
| 6  | -3.627841000 | -1.880342000 | 0.608460000  |
| 6  | -0.032837000 | -1.965327000 | 0.960959000  |
| 6  | -0.269506000 | -0.482797000 | 0.772185000  |
| 1  | -2.178541000 | 1.742643000  | 0.307820000  |
| 1  | -4.574263000 | 1.363220000  | 0.047797000  |
| 1  | -4.013893000 | -2.888977000 | 0.687277000  |
| 6  | 0.765898000  | 0.460952000  | 0.783633000  |
| 6  | 2.190636000  | 0.319169000  | 0.640477000  |
| 6  | 0.530305000  | 1.935022000  | 1.018708000  |
| 6  | 2.777464000  | 1.620990000  | 0.767423000  |
| 6  | 3.065908000  | -0.748495000 | 0.342023000  |
| 6  | 4.124840000  | 1.862495000  | 0.641261000  |
| 6  | 4.421490000  | -0.518961000 | 0.207081000  |
| 1  | 2.672646000  | -1.748677000 | 0.243698000  |
| 6  | 4.996485000  | 0.772642000  | 0.357753000  |
| 1  | 4.509855000  | 2.869137000  | 0.748753000  |
| 1  | 5.065873000  | -1.363603000 | -0.016335000 |
| 8  | -0.510551000 | 2.543316000  | 1.229691000  |
| 8  | 1.010936000  | -2.578099000 | 1.144778000  |
| 7  | 1.777406000  | 2.550510000  | 1.009395000  |
| 7  | -1.278485000 | -2.579424000 | 0.942924000  |
| 6  | -1.463477000 | -4.004151000 | 1.114337000  |
| 1  | -2.090996000 | -4.214597000 | 1.987166000  |
| 1  | -1.927215000 | -4.449666000 | 0.227174000  |
| 1  | -0.476679000 | -4.442445000 | 1.265106000  |
| 6  | 1.960981000  | 3.969459000  | 1.222153000  |
| 1  | 2.592746000  | 4.155721000  | 2.097618000  |
| 1  | 2.418188000  | 4.442850000  | 0.345938000  |
| 1  | 0.974009000  | 4.400687000  | 1.391532000  |
| 6  | -5.911308000 | -0.989167000 | 0.226013000  |
| 6  | -6.618071000 | -2.203083000 | 0.333726000  |
| 16 | -7.024857000 | 0.338669000  | -0.115343000 |
| 6  | -7.980851000 | -2.083832000 | 0.153254000  |
| 1  | -6.139024000 | -3.151810000 | 0.543378000  |
| 6  | -8.414704000 | -0.751685000 | -0.108927000 |
| 1  | -8.690652000 | -2.895372000 | 0.198232000  |
| 6  | 6.404901000  | 0.984813000  | 0.226255000  |
| 6  | 7.125808000  | 2.188117000  | 0.351876000  |
| 16 | 7.519857000  | -0.336243000 | -0.140456000 |
| 6  | 8.490760000  | 2.070857000  | 0.166654000  |
| 1  | 6.645093000  | 3.131632000  | 0.578018000  |
| 6  | 8.921003000  | 0.749338000  | -0.118014000 |
| 1  | 9.179345000  | 2.905566000  | 0.231506000  |
| 6  | -9.730336000 | -0.305451000 | -0.336325000 |

|    |               |              |              |
|----|---------------|--------------|--------------|
| 6  | -10.852786000 | -1.237052000 | -0.325080000 |
| 6  | -9.960604000  | 1.106167000  | -0.584831000 |
| 6  | -12.381120000 | 0.667624000  | -0.803415000 |
| 8  | -9.047765000  | 1.934889000  | -0.607218000 |
| 7  | -11.290575000 | 1.517276000  | -0.805649000 |
| 6  | -11.507479000 | 2.950510000  | -1.053805000 |
| 1  | -12.177790000 | 3.359668000  | -0.296540000 |
| 1  | -10.534925000 | 3.432698000  | -1.011408000 |
| 1  | -11.968710000 | 3.091059000  | -2.032466000 |
| 7  | -12.132565000 | -0.670955000 | -0.565769000 |
| 6  | -13.271290000 | -1.602154000 | -0.556862000 |
| 1  | -13.985298000 | -1.306023000 | 0.213085000  |
| 1  | -13.778330000 | -1.575664000 | -1.522542000 |
| 1  | -12.872870000 | -2.592142000 | -0.355524000 |
| 8  | -10.759192000 | -2.446316000 | -0.125969000 |
| 16 | -13.934107000 | 1.239828000  | -1.077552000 |
| 6  | 10.211823000  | 0.306000000  | -0.350795000 |
| 16 | 11.597912000  | 1.399635000  | -0.324686000 |
| 16 | 10.599300000  | -1.377555000 | -0.693105000 |
| 6  | 12.814769000  | 0.168366000  | -0.684348000 |
| 6  | 12.344064000  | -1.141668000 | -0.858169000 |
| 6  | 14.178902000  | 0.448027000  | -0.796882000 |
| 6  | 13.234051000  | -2.179392000 | -1.145348000 |
| 6  | 15.063438000  | -0.590283000 | -1.083558000 |
| 1  | 14.543289000  | 1.461404000  | -0.662430000 |
| 6  | 14.594113000  | -1.895833000 | -1.256723000 |
| 1  | 12.868952000  | -3.192540000 | -1.279501000 |
| 1  | 16.123927000  | -0.378167000 | -1.171944000 |
| 1  | 15.289808000  | -2.698144000 | -1.479616000 |

**S9TIIDTS7-OS** E=-3766.676821 Hartree

|   |              |              |              |
|---|--------------|--------------|--------------|
| 6 | 2.088318000  | -1.676516000 | -1.042440000 |
| 6 | 1.519499000  | -0.374308000 | -0.864672000 |
| 6 | 2.413778000  | 0.681109000  | -0.584107000 |
| 6 | 3.773237000  | 0.439049000  | -0.507247000 |
| 6 | 4.326841000  | -0.854262000 | -0.704493000 |
| 6 | 3.438442000  | -1.931036000 | -0.975610000 |
| 6 | -0.168628000 | -1.976223000 | -1.199114000 |
| 6 | 0.084611000  | -0.505232000 | -0.949363000 |
| 1 | 2.034614000  | 1.683380000  | -0.458096000 |
| 1 | 4.436933000  | 1.276038000  | -0.316604000 |
| 1 | 3.812256000  | -2.939847000 | -1.100093000 |
| 6 | -0.942363000 | 0.441039000  | -0.876720000 |

|    |              |              |              |
|----|--------------|--------------|--------------|
| 6  | -2.366835000 | 0.300629000  | -0.703918000 |
| 6  | -0.702762000 | 1.927244000  | -1.028837000 |
| 6  | -2.944743000 | 1.611015000  | -0.738590000 |
| 6  | -3.243300000 | -0.775430000 | -0.446070000 |
| 6  | -4.286745000 | 1.854954000  | -0.563460000 |
| 6  | -4.593756000 | -0.544212000 | -0.262314000 |
| 1  | -2.856819000 | -1.782473000 | -0.416121000 |
| 6  | -5.160169000 | 0.757388000  | -0.322020000 |
| 1  | -4.664959000 | 2.869134000  | -0.601528000 |
| 1  | -5.239362000 | -1.396047000 | -0.072362000 |
| 8  | 0.336294000  | 2.541362000  | -1.228844000 |
| 8  | -1.221938000 | -2.575398000 | -1.373230000 |
| 7  | -1.944117000 | 2.547495000  | -0.950977000 |
| 7  | 1.072298000  | -2.596919000 | -1.255991000 |
| 6  | 1.240715000  | -4.012604000 | -1.503047000 |
| 1  | 1.835935000  | -4.183266000 | -2.406620000 |
| 1  | 1.731732000  | -4.503732000 | -0.655507000 |
| 1  | 0.246101000  | -4.437431000 | -1.640204000 |
| 6  | -2.122792000 | 3.977856000  | -1.074057000 |
| 1  | -2.776283000 | 4.219154000  | -1.919553000 |
| 1  | -2.553075000 | 4.400583000  | -0.159198000 |
| 1  | -1.137685000 | 4.412950000  | -1.244165000 |
| 6  | 5.740896000  | -1.086263000 | -0.624006000 |
| 6  | 6.450955000  | -2.251923000 | -0.961247000 |
| 16 | 6.854995000  | 0.148314000  | -0.061490000 |
| 6  | 7.818792000  | -2.162844000 | -0.774371000 |
| 1  | 5.967972000  | -3.136403000 | -1.357932000 |
| 6  | 8.253309000  | -0.902143000 | -0.283979000 |
| 1  | 8.526969000  | -2.955658000 | -0.967214000 |
| 6  | -6.564423000 | 0.972728000  | -0.141896000 |
| 6  | -7.277142000 | 2.185440000  | -0.180694000 |
| 16 | -7.680338000 | -0.358995000 | 0.178546000  |
| 6  | -8.638841000 | 2.067543000  | 0.033060000  |
| 1  | -6.794524000 | 3.136885000  | -0.365973000 |
| 6  | -9.072220000 | 0.735546000  | 0.253612000  |
| 1  | -9.321678000 | 2.909429000  | 0.033018000  |
| 6  | 9.567194000  | -0.593615000 | 0.113936000  |
| 6  | 10.544126000 | -1.687246000 | 0.418795000  |
| 6  | 10.173352000 | 0.655118000  | 0.515755000  |
| 6  | 11.634489000 | -1.052987000 | 1.200438000  |
| 6  | 11.396434000 | 0.328522000  | 1.306125000  |
| 6  | 12.734789000 | -1.667079000 | 1.780060000  |
| 6  | 12.286802000 | 1.119746000  | 2.035692000  |
| 6  | 13.622201000 | -0.872055000 | 2.510604000  |

|    |               |              |              |
|----|---------------|--------------|--------------|
| 1  | 12.881970000  | -2.735746000 | 1.660767000  |
| 6  | 13.390630000  | 0.501338000  | 2.636682000  |
| 1  | 12.142806000  | 2.184969000  | 2.154499000  |
| 1  | 14.491256000  | -1.318375000 | 2.984244000  |
| 1  | 14.081599000  | 1.109260000  | 3.212929000  |
| 8  | 10.472368000  | -2.875118000 | 0.132041000  |
| 6  | 9.818177000   | 1.943000000  | 0.124072000  |
| 6  | 8.930731000   | 2.231605000  | -0.954710000 |
| 7  | 8.261507000   | 2.524928000  | -1.862911000 |
| 6  | 10.429597000  | 3.113109000  | 0.667641000  |
| 7  | 10.892249000  | 4.090537000  | 1.103335000  |
| 6  | -10.360885000 | 0.287859000  | 0.494606000  |
| 16 | -11.737719000 | 1.390713000  | 0.566823000  |
| 16 | -10.753202000 | -1.409667000 | 0.750677000  |
| 6  | -12.955159000 | 0.149396000  | 0.887637000  |
| 6  | -12.491089000 | -1.171652000 | 0.974422000  |
| 6  | -14.313587000 | 0.431534000  | 1.051539000  |
| 6  | -13.382046000 | -2.217921000 | 1.225396000  |
| 6  | -15.199073000 | -0.615314000 | 1.301852000  |
| 1  | -14.672842000 | 1.453401000  | 0.984389000  |
| 6  | -14.736362000 | -1.931819000 | 1.388242000  |
| 1  | -13.022088000 | -3.239551000 | 1.292208000  |
| 1  | -16.255131000 | -0.401305000 | 1.429859000  |
| 1  | -15.432777000 | -2.740720000 | 1.583343000  |

**S9TIIDTS8-OS** E=-4201.897606 Hartree

|   |              |              |              |
|---|--------------|--------------|--------------|
| 6 | -3.426363000 | 1.684402000  | -0.695482000 |
| 6 | -2.831630000 | 0.381513000  | -0.699128000 |
| 6 | -3.692905000 | -0.712755000 | -0.470561000 |
| 6 | -5.046246000 | -0.504742000 | -0.278313000 |
| 6 | -5.629373000 | 0.790154000  | -0.300412000 |
| 6 | -4.771353000 | 1.905556000  | -0.511650000 |
| 6 | -1.189577000 | 2.039927000  | -0.979574000 |
| 6 | -1.408386000 | 0.545895000  | -0.870444000 |
| 1 | -3.293132000 | -1.714973000 | -0.469300000 |
| 1 | -5.679940000 | -1.370236000 | -0.111484000 |
| 1 | -5.162909000 | 2.915306000  | -0.520440000 |
| 6 | -0.369816000 | -0.382769000 | -0.972630000 |
| 6 | 1.065241000  | -0.234287000 | -0.893198000 |
| 6 | -0.603853000 | -1.851343000 | -1.257883000 |
| 6 | 1.649240000  | -1.523216000 | -1.108595000 |
| 6 | 1.946264000  | 0.825076000  | -0.590391000 |
| 6 | 3.003815000  | -1.761106000 | -1.056861000 |

|    |              |              |              |
|----|--------------|--------------|--------------|
| 6  | 3.310068000  | 0.599322000  | -0.528281000 |
| 1  | 1.554812000  | 1.818575000  | -0.436302000 |
| 6  | 3.877371000  | -0.679998000 | -0.763270000 |
| 1  | 3.391093000  | -2.761658000 | -1.204956000 |
| 1  | 3.964314000  | 1.440373000  | -0.323261000 |
| 8  | -1.649829000 | -2.460428000 | -1.440231000 |
| 8  | -0.159553000 | 2.673696000  | -1.162697000 |
| 7  | 0.644952000  | -2.452285000 | -1.338694000 |
| 7  | -2.439000000 | 2.640199000  | -0.882362000 |
| 6  | -2.637675000 | 4.071094000  | -0.963587000 |
| 1  | -3.295774000 | 4.327543000  | -1.800955000 |
| 1  | -3.072212000 | 4.460801000  | -0.036215000 |
| 1  | -1.659049000 | 4.524688000  | -1.122181000 |
| 6  | 0.832126000  | -3.859264000 | -1.621577000 |
| 1  | 1.423645000  | -3.998676000 | -2.532811000 |
| 1  | 1.335796000  | -4.363382000 | -0.789362000 |
| 1  | -0.157035000 | -4.295178000 | -1.762895000 |
| 6  | -7.036615000 | 0.981872000  | -0.112293000 |
| 6  | -7.764701000 | 2.185835000  | -0.115179000 |
| 16 | -8.133713000 | -0.372640000 | 0.170833000  |
| 6  | -9.124503000 | 2.043673000  | 0.096967000  |
| 1  | -7.294929000 | 3.148465000  | -0.273443000 |
| 6  | -9.539385000 | 0.700541000  | 0.279441000  |
| 1  | -9.818310000 | 2.876155000  | 0.122271000  |
| 6  | 5.297462000  | -0.896891000 | -0.698574000 |
| 6  | 6.021719000  | -2.022831000 | -1.119176000 |
| 16 | 6.388441000  | 0.310919000  | -0.045929000 |
| 6  | 7.390358000  | -1.921065000 | -0.928807000 |
| 1  | 5.553503000  | -2.880381000 | -1.585656000 |
| 6  | 7.799314000  | -0.696455000 | -0.348711000 |
| 1  | 8.102542000  | -2.680691000 | -1.225740000 |
| 6  | 9.108527000  | -0.397008000 | 0.070485000  |
| 6  | 9.764942000  | 0.802370000  | 0.451455000  |
| 6  | 11.353418000 | -0.824103000 | 1.287096000  |
| 6  | 10.998925000 | 0.532546000  | 1.249606000  |
| 6  | 12.482577000 | -1.311797000 | 1.925387000  |
| 6  | 11.840174000 | 1.434659000  | 1.917484000  |
| 6  | 13.305526000 | -0.396140000 | 2.583433000  |
| 1  | 12.709553000 | -2.372641000 | 1.915226000  |
| 6  | 12.976092000 | 0.961163000  | 2.577594000  |
| 1  | 11.623560000 | 2.492821000  | 1.939827000  |
| 1  | 14.195374000 | -0.740413000 | 3.100573000  |
| 1  | 13.613312000 | 1.670940000  | 3.095719000  |
| 6  | 9.378421000  | 2.087908000  | 0.025688000  |

|    |               |              |              |
|----|---------------|--------------|--------------|
| 6  | 9.897513000   | 3.298657000  | 0.564360000  |
| 7  | 10.277264000  | 4.317872000  | 0.987490000  |
| 6  | 8.514676000   | 2.306347000  | -1.084204000 |
| 7  | 7.850598000   | 2.537762000  | -2.014909000 |
| 16 | 10.166446000  | -1.829091000 | 0.423628000  |
| 8  | 9.501032000   | -2.747903000 | 1.360788000  |
| 8  | 10.731001000  | -2.387616000 | -0.817492000 |
| 6  | -10.822172000 | 0.228819000  | 0.509409000  |
| 16 | -12.212366000 | 1.310379000  | 0.615412000  |
| 16 | -11.191002000 | -1.479601000 | 0.716745000  |
| 6  | -13.412887000 | 0.044876000  | 0.903124000  |
| 6  | -12.931250000 | -1.271813000 | 0.950977000  |
| 6  | -14.774474000 | 0.304462000  | 1.077951000  |
| 6  | -13.807490000 | -2.336774000 | 1.173731000  |
| 6  | -15.645181000 | -0.760876000 | 1.300007000  |
| 1  | -15.147374000 | 1.322950000  | 1.040953000  |
| 6  | -15.164906000 | -2.073178000 | 1.347588000  |
| 1  | -13.433980000 | -3.355035000 | 1.210489000  |
| 1  | -16.703639000 | -0.564773000 | 1.436409000  |
| 1  | -15.850189000 | -2.896385000 | 1.520919000  |

**S9TIIDTS10- OS** E=-4034.175252 Hartree

|   |              |              |              |
|---|--------------|--------------|--------------|
| 6 | -3.582558000 | -1.460944000 | 0.632130000  |
| 6 | -2.975553000 | -0.174415000 | 0.480309000  |
| 6 | -3.833922000 | 0.895657000  | 0.153146000  |
| 6 | -5.194363000 | 0.681664000  | 0.012883000  |
| 6 | -5.788404000 | -0.595559000 | 0.186691000  |
| 6 | -4.933412000 | -1.688067000 | 0.500902000  |
| 6 | -1.341315000 | -1.807852000 | 0.907573000  |
| 6 | -1.547901000 | -0.336080000 | 0.638758000  |
| 1 | -3.426874000 | 1.888107000  | 0.035064000  |
| 1 | -5.824917000 | 1.530910000  | -0.231964000 |
| 1 | -5.332258000 | -2.687435000 | 0.626654000  |
| 6 | -0.496833000 | 0.586576000  | 0.612364000  |
| 6 | 0.935184000  | 0.412686000  | 0.519099000  |
| 6 | -0.710023000 | 2.076993000  | 0.731227000  |
| 6 | 1.538772000  | 1.708870000  | 0.567268000  |
| 6 | 1.802374000  | -0.682525000 | 0.325619000  |
| 6 | 2.893670000  | 1.924512000  | 0.460985000  |
| 6 | 3.167142000  | -0.480862000 | 0.211881000  |
| 1 | 1.397953000  | -1.682386000 | 0.289635000  |
| 6 | 3.757067000  | 0.808184000  | 0.282462000  |
| 1 | 3.289644000  | 2.931992000  | 0.503329000  |

|    |               |              |              |
|----|---------------|--------------|--------------|
| 1  | 3.804318000   | -1.348650000 | 0.071606000  |
| 8  | -1.743946000  | 2.720987000  | 0.866721000  |
| 8  | -0.313722000  | -2.434045000 | 1.139894000  |
| 7  | 0.547187000   | 2.669760000  | 0.711730000  |
| 7  | -2.598079000  | -2.401859000 | 0.902125000  |
| 6  | -2.807347000  | -3.811299000 | 1.144257000  |
| 1  | -3.450043000  | -3.968348000 | 2.017835000  |
| 1  | -3.266404000  | -4.296984000 | 0.275408000  |
| 1  | -1.829070000  | -4.255075000 | 1.331379000  |
| 6  | 0.750505000   | 4.096294000  | 0.824068000  |
| 1  | 1.363248000   | 4.337700000  | 1.699925000  |
| 1  | 1.239867000   | 4.496753000  | -0.071295000 |
| 1  | -0.232812000  | 4.554521000  | 0.934031000  |
| 6  | -7.203086000  | -0.794174000 | 0.048914000  |
| 6  | -7.943800000  | -1.975660000 | 0.205635000  |
| 16 | -8.295537000  | 0.533976000  | -0.372107000 |
| 6  | -9.309641000  | -1.843508000 | 0.003704000  |
| 1  | -7.481437000  | -2.919407000 | 0.468109000  |
| 6  | -9.715268000  | -0.527062000 | -0.327121000 |
| 1  | -10.012158000 | -2.664604000 | 0.089990000  |
| 6  | 5.175782000   | 0.994765000  | 0.174576000  |
| 6  | 5.912515000   | 2.187694000  | 0.245439000  |
| 16 | 6.279283000   | -0.365200000 | -0.083521000 |
| 6  | 7.283464000   | 2.040154000  | 0.103209000  |
| 1  | 5.442587000   | 3.150791000  | 0.403319000  |
| 6  | 7.698967000   | 0.698180000  | -0.089725000 |
| 1  | 7.983768000   | 2.866862000  | 0.136525000  |
| 6  | -10.996224000 | -0.066136000 | -0.586959000 |
| 16 | -11.365133000 | 1.617091000  | -0.988829000 |
| 16 | -12.416917000 | -1.126580000 | -0.543255000 |
| 6  | -13.096676000 | 1.369709000  | -1.153447000 |
| 6  | -13.570183000 | 0.133377000  | -0.952554000 |
| 1  | -14.612716000 | -0.151038000 | -1.023292000 |
| 1  | -13.699915000 | 2.231514000  | -1.410373000 |
| 6  | 8.986656000   | 0.219686000  | -0.261826000 |
| 16 | 10.394169000  | 1.293843000  | -0.267751000 |
| 16 | 9.356348000   | -1.491852000 | -0.491195000 |
| 6  | 11.596923000  | 0.021735000  | -0.517618000 |
| 6  | 11.108547000  | -1.289734000 | -0.622973000 |
| 6  | 12.968269000  | 0.271254000  | -0.610693000 |
| 6  | 11.989451000  | -2.355463000 | -0.821665000 |
| 6  | 13.843778000  | -0.795585000 | -0.809084000 |
| 1  | 13.345859000  | 1.285567000  | -0.529076000 |
| 6  | 13.357267000  | -2.101518000 | -0.913991000 |

|   |              |              |              |
|---|--------------|--------------|--------------|
| 1 | 11.610606000 | -3.369325000 | -0.902840000 |
| 1 | 14.909653000 | -0.604802000 | -0.881736000 |
| 1 | 14.044346000 | -2.927242000 | -1.068277000 |

**S9TIIDTS1-T1** E=-3346.077132 Hartree

|    |              |              |              |
|----|--------------|--------------|--------------|
| 6  | 0.802655000  | 1.724952000  | 0.498572000  |
| 6  | 0.193911000  | 0.436302000  | 0.446360000  |
| 6  | 1.053963000  | -0.665182000 | 0.282088000  |
| 6  | 2.425487000  | -0.474522000 | 0.199135000  |
| 6  | 3.019107000  | 0.808271000  | 0.273419000  |
| 6  | 2.162792000  | 1.930838000  | 0.421831000  |
| 6  | -1.441365000 | 2.130622000  | 0.608535000  |
| 6  | -1.247324000 | 0.623755000  | 0.506373000  |
| 1  | 0.643220000  | -1.661841000 | 0.241057000  |
| 1  | 3.058420000  | -1.348800000 | 0.084759000  |
| 1  | 2.564839000  | 2.935784000  | 0.460186000  |
| 6  | -2.302865000 | -0.274182000 | 0.519143000  |
| 6  | -3.748582000 | -0.085539000 | 0.377687000  |
| 6  | -2.120994000 | -1.757698000 | 0.744142000  |
| 6  | -4.361190000 | -1.365210000 | 0.513467000  |
| 6  | -4.589387000 | 0.996806000  | 0.077527000  |
| 6  | -5.721133000 | -1.574138000 | 0.394589000  |
| 6  | -5.960855000 | 0.801737000  | -0.049430000 |
| 1  | -4.173954000 | 1.986188000  | -0.029903000 |
| 6  | -6.557059000 | -0.466987000 | 0.112592000  |
| 1  | -6.131313000 | -2.572604000 | 0.485521000  |
| 1  | -6.585769000 | 1.665160000  | -0.254767000 |
| 8  | -1.103060000 | -2.409253000 | 0.940253000  |
| 8  | -2.470044000 | 2.783233000  | 0.716212000  |
| 7  | -3.388296000 | -2.326485000 | 0.746747000  |
| 7  | -0.180779000 | 2.701987000  | 0.611713000  |
| 6  | 0.042592000  | 4.127967000  | 0.716396000  |
| 1  | 0.641255000  | 4.364636000  | 1.602632000  |
| 1  | 0.556133000  | 4.510477000  | -0.172634000 |
| 1  | -0.934227000 | 4.604119000  | 0.802552000  |
| 6  | -3.620110000 | -3.739418000 | 0.955095000  |
| 1  | -4.254412000 | -3.905880000 | 1.832599000  |
| 1  | -4.098080000 | -4.192478000 | 0.079280000  |
| 1  | -2.648287000 | -4.205661000 | 1.118062000  |
| 6  | 4.448701000  | 0.986975000  | 0.197448000  |
| 6  | 5.190844000  | 2.166120000  | 0.319000000  |
| 16 | 5.539010000  | -0.374961000 | -0.081652000 |
| 6  | 6.567266000  | 2.007121000  | 0.198983000  |



|    |               |              |              |
|----|---------------|--------------|--------------|
| 1  | 4.729232000   | 3.128952000  | 0.501508000  |
| 6  | 6.967473000   | 0.669854000  | -0.026150000 |
| 1  | 7.275456000   | 2.824123000  | 0.273411000  |
| 6  | -7.990312000  | -0.650470000 | -0.007011000 |
| 6  | -8.754005000  | -1.762741000 | 0.361992000  |
| 16 | -9.025968000  | 0.599714000  | -0.685534000 |
| 6  | -10.118941000 | -1.627130000 | 0.121868000  |
| 1  | -8.320128000  | -2.642942000 | 0.819949000  |
| 6  | -10.462314000 | -0.386759000 | -0.451970000 |
| 1  | -10.863687000 | -2.379271000 | 0.352695000  |
| 6  | -11.750140000 | 0.057072000  | -0.813894000 |
| 6  | -12.872680000 | -0.789051000 | -0.613781000 |
| 7  | -13.778206000 | -1.503783000 | -0.438616000 |
| 6  | -11.968083000 | 1.338472000  | -1.380542000 |
| 7  | -12.125235000 | 2.397338000  | -1.845897000 |
| 6  | 8.257124000   | 0.176600000  | -0.188901000 |
| 16 | 9.672730000   | 1.232743000  | -0.138153000 |
| 16 | 8.607636000   | -1.529582000 | -0.460042000 |
| 6  | 10.865877000  | -0.045499000 | -0.401002000 |
| 6  | 10.364270000  | -1.347199000 | -0.553133000 |
| 6  | 12.241628000  | 0.190310000  | -0.460814000 |
| 6  | 11.235528000  | -2.418306000 | -0.765741000 |
| 6  | 13.107266000  | -0.881447000 | -0.673133000 |
| 1  | 12.629699000  | 1.197015000  | -0.343069000 |
| 6  | 12.607316000  | -2.178074000 | -0.824743000 |
| 1  | 10.846528000  | -3.424673000 | -0.883187000 |
| 1  | 14.176512000  | -0.702328000 | -0.720199000 |
| 1  | 13.287705000  | -3.007166000 | -0.989684000 |

**S9TIIDTS3-T1** E=-3913.935667 Hartree

|   |              |              |              |
|---|--------------|--------------|--------------|
| 6 | -2.591351000 | -1.426690000 | 0.513334000  |
| 6 | -1.995870000 | -0.149149000 | 0.307904000  |
| 6 | -2.851511000 | 0.905015000  | -0.044349000 |
| 6 | -4.221450000 | 0.685340000  | -0.158735000 |
| 6 | -4.797330000 | -0.579285000 | 0.071332000  |
| 6 | -3.950814000 | -1.657561000 | 0.413480000  |
| 6 | -0.348568000 | -1.774281000 | 0.780792000  |
| 6 | -0.548190000 | -0.309923000 | 0.464511000  |
| 1 | -2.447586000 | 1.890386000  | -0.214472000 |
| 1 | -4.854764000 | 1.515679000  | -0.455029000 |
| 1 | -4.358620000 | -2.640421000 | 0.618061000  |
| 6 | 0.497189000  | 0.599216000  | 0.400209000  |
| 6 | 1.940046000  | 0.425718000  | 0.358607000  |

|    |               |              |              |
|----|---------------|--------------|--------------|
| 6  | 0.284752000   | 2.106098000  | 0.405328000  |
| 6  | 2.534302000   | 1.722624000  | 0.333268000  |
| 6  | 2.814709000   | -0.673525000 | 0.268324000  |
| 6  | 3.891920000   | 1.939762000  | 0.251794000  |
| 6  | 4.183857000   | -0.471966000 | 0.180957000  |
| 1  | 2.416076000   | -1.675694000 | 0.287580000  |
| 6  | 4.762906000   | 0.820295000  | 0.178442000  |
| 1  | 4.281772000   | 2.950033000  | 0.230766000  |
| 1  | 4.827522000   | -1.344087000 | 0.123997000  |
| 8  | -0.751783000  | 2.753144000  | 0.464139000  |
| 8  | 0.676361000   | -2.400018000 | 1.020793000  |
| 7  | 1.538627000   | 2.692315000  | 0.379602000  |
| 7  | -1.608463000  | -2.358891000 | 0.811998000  |
| 6  | -1.823221000  | -3.759126000 | 1.106019000  |
| 1  | -2.452972000  | -3.880398000 | 1.994186000  |
| 1  | -2.298469000  | -4.269326000 | 0.260665000  |
| 1  | -0.845531000  | -4.203475000 | 1.293346000  |
| 6  | 1.744051000   | 4.124561000  | 0.395145000  |
| 1  | 2.333467000   | 4.424553000  | 1.268353000  |
| 1  | 2.259332000   | 4.456603000  | -0.513012000 |
| 1  | 0.760895000   | 4.592836000  | 0.444728000  |
| 6  | -6.233513000  | -0.794552000 | -0.044547000 |
| 6  | -6.915306000  | -1.990933000 | -0.226467000 |
| 16 | -7.367580000  | 0.538617000  | 0.044564000  |
| 6  | -8.309813000  | -1.848679000 | -0.306259000 |
| 1  | -6.409214000  | -2.942494000 | -0.331923000 |
| 6  | -8.745773000  | -0.531829000 | -0.185305000 |
| 1  | -8.989824000  | -2.678429000 | -0.462984000 |
| 6  | 6.189077000   | 1.010376000  | 0.099748000  |
| 6  | 6.916691000   | 2.205582000  | 0.142998000  |
| 16 | 7.298553000   | -0.353722000 | -0.075501000 |
| 6  | 8.294585000   | 2.056213000  | 0.043569000  |
| 1  | 6.441674000   | 3.172798000  | 0.253507000  |
| 6  | 8.713799000   | 0.711122000  | -0.084516000 |
| 1  | 8.992133000   | 2.885440000  | 0.064725000  |
| 6  | -10.077507000 | -0.033004000 | -0.223585000 |
| 6  | -10.512616000 | 1.303353000  | -0.141167000 |
| 16 | -11.483310000 | -1.066085000 | -0.389644000 |
| 1  | -9.832337000  | 2.142413000  | -0.035258000 |
| 6  | -12.510918000 | 0.387804000  | -0.335256000 |
| 6  | -13.911201000 | 0.320151000  | -0.425849000 |
| 6  | -14.571721000 | -0.927352000 | -0.567758000 |
| 7  | -15.089570000 | -1.966593000 | -0.684105000 |
| 6  | -14.698063000 | 1.501115000  | -0.377252000 |

|    |               |              |              |
|----|---------------|--------------|--------------|
| 7  | -15.372301000 | 2.451517000  | -0.340769000 |
| 7  | -11.823212000 | 1.530695000  | -0.201403000 |
| 6  | 10.009968000  | 0.225610000  | -0.203746000 |
| 16 | 11.412042000  | 1.301023000  | -0.217444000 |
| 16 | 10.384312000  | -1.490571000 | -0.352929000 |
| 6  | 12.623167000  | 0.023368000  | -0.383339000 |
| 6  | 12.139177000  | -1.292167000 | -0.447525000 |
| 6  | 13.996182000  | 0.272550000  | -0.450821000 |
| 6  | 13.025351000  | -2.363984000 | -0.579467000 |
| 6  | 14.876791000  | -0.799966000 | -0.582481000 |
| 1  | 14.370639000  | 1.290006000  | -0.401053000 |
| 6  | 14.394384000  | -2.110442000 | -0.646448000 |
| 1  | 12.649973000  | -3.381104000 | -0.628912000 |
| 1  | 15.943993000  | -0.610557000 | -0.635185000 |
| 1  | 15.086370000  | -2.940008000 | -0.748889000 |

**S9TIIDTS4-T1** E=-3879.957048 Hartree

|   |              |              |              |
|---|--------------|--------------|--------------|
| 6 | 3.067491000  | -1.567075000 | -0.660177000 |
| 6 | 2.484268000  | -0.269742000 | -0.599753000 |
| 6 | 3.355929000  | 0.812176000  | -0.404168000 |
| 6 | 4.727273000  | 0.596874000  | -0.303553000 |
| 6 | 5.292790000  | -0.692210000 | -0.389400000 |
| 6 | 4.426356000  | -1.796823000 | -0.564935000 |
| 6 | 0.814668000  | -1.931100000 | -0.795344000 |
| 6 | 1.030890000  | -0.436842000 | -0.683643000 |
| 1 | 2.963665000  | 1.815661000  | -0.356992000 |
| 1 | 5.376934000  | 1.457712000  | -0.182628000 |
| 1 | 4.814848000  | -2.807950000 | -0.590221000 |
| 6 | -0.007360000 | 0.479097000  | -0.704371000 |
| 6 | -1.452512000 | 0.323924000  | -0.591898000 |
| 6 | 0.209890000  | 1.969782000  | -0.913677000 |
| 6 | -2.038500000 | 1.617255000  | -0.716084000 |
| 6 | -2.327375000 | -0.744847000 | -0.328855000 |
| 6 | -3.392443000 | 1.855984000  | -0.616777000 |
| 6 | -3.693342000 | -0.520930000 | -0.222289000 |
| 1 | -1.934645000 | -1.744645000 | -0.230124000 |
| 6 | -4.264807000 | 0.764604000  | -0.368631000 |
| 1 | -3.776339000 | 2.864344000  | -0.712034000 |
| 1 | -4.338746000 | -1.372697000 | -0.032130000 |
| 8 | 1.245503000  | 2.595824000  | -1.093088000 |
| 8 | -0.221370000 | -2.573179000 | -0.914171000 |
| 7 | -1.040844000 | 2.564231000  | -0.922386000 |
| 7 | 2.069024000  | -2.523840000 | -0.793515000 |

|    |               |              |              |
|----|---------------|--------------|--------------|
| 6  | 2.268869000   | -3.952088000 | -0.904754000 |
| 1  | 2.873951000   | -4.194422000 | -1.785322000 |
| 1  | 2.765273000   | -4.350192000 | -0.012548000 |
| 1  | 1.284459000   | -4.409571000 | -1.005376000 |
| 6  | -1.241270000  | 3.983427000  | -1.118379000 |
| 1  | -1.860139000  | 4.171724000  | -2.002502000 |
| 1  | -1.723182000  | 4.436035000  | -0.244524000 |
| 1  | -0.258554000  | 4.432759000  | -1.262652000 |
| 6  | 6.728947000   | -0.899743000 | -0.298129000 |
| 6  | 7.453411000   | -2.032449000 | -0.672659000 |
| 16 | 7.797886000   | 0.340431000  | 0.341010000  |
| 6  | 8.827436000   | -1.919093000 | -0.466415000 |
| 1  | 6.991596000   | -2.907672000 | -1.113150000 |
| 6  | 9.217097000   | -0.681542000 | 0.084189000  |
| 1  | 9.542890000   | -2.695524000 | -0.712220000 |
| 6  | -5.689474000  | 0.977787000  | -0.266927000 |
| 6  | -6.414113000  | 2.156807000  | -0.462029000 |
| 16 | -6.794735000  | -0.336053000 | 0.151852000  |
| 6  | -7.789911000  | 2.035216000  | -0.291243000 |
| 1  | -5.941335000  | 3.092307000  | -0.735720000 |
| 6  | -8.206704000  | 0.728577000  | 0.051627000  |
| 1  | -8.485700000  | 2.857308000  | -0.412298000 |
| 6  | 10.510930000  | -0.267398000 | 0.406327000  |
| 6  | 10.836795000  | 1.037136000  | 0.969209000  |
| 16 | 11.952926000  | -1.254036000 | 0.182081000  |
| 6  | 13.010432000  | 0.076051000  | 0.838082000  |
| 7  | 12.222740000  | 1.154530000  | 1.177817000  |
| 6  | 12.822888000  | 2.362574000  | 1.732997000  |
| 1  | 13.536651000  | 2.788532000  | 1.024220000  |
| 1  | 12.011911000  | 3.065662000  | 1.920261000  |
| 1  | 13.344689000  | 2.130311000  | 2.664153000  |
| 8  | 14.211055000  | -0.002307000 | 0.947613000  |
| 8  | 10.037649000  | 1.929018000  | 1.235254000  |
| 6  | -9.498970000  | 0.274556000  | 0.288768000  |
| 16 | -10.898404000 | 1.351071000  | 0.194077000  |
| 16 | -9.871140000  | -1.398863000 | 0.704491000  |
| 6  | -12.105039000 | 0.119156000  | 0.585733000  |
| 6  | -11.621383000 | -1.176068000 | 0.826619000  |
| 6  | -13.474622000 | 0.384248000  | 0.661646000  |
| 6  | -12.504853000 | -2.210541000 | 1.144177000  |
| 6  | -14.352530000 | -0.651156000 | 0.978931000  |
| 1  | -13.848715000 | 1.385884000  | 0.475176000  |
| 6  | -13.870566000 | -1.941088000 | 1.218836000  |
| 1  | -12.129696000 | -3.211873000 | 1.330053000  |

|   |               |              |             |
|---|---------------|--------------|-------------|
| 1 | -15.417009000 | -0.448696000 | 1.038656000 |
| 1 | -14.560001000 | -2.742094000 | 1.465175000 |

**S9TIIDTS5- T1** E=-3651.420968 Hartree

|    |              |              |              |
|----|--------------|--------------|--------------|
| 6  | -2.678702000 | -1.578940000 | 0.662227000  |
| 6  | -2.091767000 | -0.280793000 | 0.624610000  |
| 6  | -2.959301000 | 0.808320000  | 0.449118000  |
| 6  | -4.330651000 | 0.599642000  | 0.345969000  |
| 6  | -4.900827000 | -0.690166000 | 0.410690000  |
| 6  | -4.038239000 | -1.801591000 | 0.566684000  |
| 6  | -0.426010000 | -1.947955000 | 0.785746000  |
| 6  | -0.639803000 | -0.453603000 | 0.703128000  |
| 1  | -2.563488000 | 1.811075000  | 0.420003000  |
| 1  | -4.977145000 | 1.464522000  | 0.239070000  |
| 1  | -4.430076000 | -2.811564000 | 0.577275000  |
| 6  | 0.400048000  | 0.461988000  | 0.740053000  |
| 6  | 1.840858000  | 0.308643000  | 0.614501000  |
| 6  | 0.185464000  | 1.948167000  | 0.991179000  |
| 6  | 2.430642000  | 1.598165000  | 0.767836000  |
| 6  | 2.711810000  | -0.755913000 | 0.317533000  |
| 6  | 3.783804000  | 1.836178000  | 0.665192000  |
| 6  | 4.076279000  | -0.532205000 | 0.206775000  |
| 1  | 2.315559000  | -1.751926000 | 0.196219000  |
| 6  | 4.651974000  | 0.749033000  | 0.382233000  |
| 1  | 4.171130000  | 2.840386000  | 0.786021000  |
| 1  | 4.718393000  | -1.379492000 | -0.011995000 |
| 8  | -0.848933000 | 2.567692000  | 1.195527000  |
| 8  | 0.608817000  | -2.594287000 | 0.889690000  |
| 7  | 1.436380000  | 2.541014000  | 1.006059000  |
| 7  | -1.682715000 | -2.538785000 | 0.776365000  |
| 6  | -1.884653000 | -3.968833000 | 0.862302000  |
| 1  | -2.486162000 | -4.226253000 | 1.740960000  |
| 1  | -2.385014000 | -4.349526000 | -0.035195000 |
| 1  | -0.900569000 | -4.429507000 | 0.950448000  |
| 6  | 1.640397000  | 3.954568000  | 1.238973000  |
| 1  | 2.265088000  | 4.117731000  | 2.123858000  |
| 1  | 2.117107000  | 4.429484000  | 0.374304000  |
| 1  | 0.659529000  | 4.401493000  | 1.401792000  |
| 6  | -6.335701000 | -0.888222000 | 0.317188000  |
| 6  | -7.060382000 | -2.037409000 | 0.648157000  |
| 16 | -7.406261000 | 0.376281000  | -0.263885000 |
| 6  | -8.431149000 | -1.907265000 | 0.451126000  |
| 1  | -6.602924000 | -2.933299000 | 1.049472000  |

|    |               |              |              |
|----|---------------|--------------|--------------|
| 6  | -8.823619000  | -0.647295000 | -0.047151000 |
| 1  | -9.135798000  | -2.699245000 | 0.672275000  |
| 6  | 6.074859000   | 0.960983000  | 0.275371000  |
| 6  | 6.801732000   | 2.139192000  | 0.474762000  |
| 16 | 7.176991000   | -0.350717000 | -0.156666000 |
| 6  | 8.175507000   | 2.017520000  | 0.296219000  |
| 1  | 6.331095000   | 3.073843000  | 0.754691000  |
| 6  | 8.589458000   | 0.712531000  | -0.057415000 |
| 1  | 8.872486000   | 2.838492000  | 0.417886000  |
| 6  | -10.144004000 | -0.226685000 | -0.348774000 |
| 6  | -11.259667000 | -1.075598000 | -0.180338000 |
| 6  | -10.372915000 | 1.140142000  | -0.855815000 |
| 6  | -12.539206000 | -0.660892000 | -0.469930000 |
| 1  | -11.118971000 | -2.085898000 | 0.186420000  |
| 6  | -12.817208000 | 0.695433000  | -0.973599000 |
| 6  | -13.648055000 | -1.535800000 | -0.291395000 |
| 7  | -14.525524000 | -2.284441000 | -0.130678000 |
| 8  | -9.454021000  | 1.939469000  | -1.036668000 |
| 8  | -13.944113000 | 1.089969000  | -1.237739000 |
| 7  | -11.686212000 | 1.516499000  | -1.133029000 |
| 6  | -11.881597000 | 2.882315000  | -1.633636000 |
| 1  | -11.506620000 | 3.600768000  | -0.902018000 |
| 1  | -11.325931000 | 3.017893000  | -2.563677000 |
| 1  | -12.946851000 | 3.021940000  | -1.798562000 |
| 6  | 9.880455000   | 0.259771000  | -0.304292000 |
| 16 | 11.280080000  | 1.334025000  | -0.207834000 |
| 16 | 10.248730000  | -1.409767000 | -0.734107000 |
| 6  | 12.483939000  | 0.105563000  | -0.618094000 |
| 6  | 11.998208000  | -1.187338000 | -0.866432000 |
| 6  | 13.853056000  | 0.371167000  | -0.700796000 |
| 6  | 12.878776000  | -2.219790000 | -1.198376000 |
| 6  | 14.728034000  | -0.662067000 | -1.032376000 |
| 1  | 14.228871000  | 1.371046000  | -0.508632000 |
| 6  | 14.243900000  | -1.949930000 | -1.279726000 |
| 1  | 12.502040000  | -3.219397000 | -1.390074000 |
| 1  | 15.792173000  | -0.459701000 | -1.097540000 |
| 1  | 14.931466000  | -2.748985000 | -1.537204000 |

**S9TIIDTS6-T1** E=-4012.741603 Hartree

|   |              |              |             |
|---|--------------|--------------|-------------|
| 6 | -2.294698000 | -1.626953000 | 0.653831000 |
| 6 | -1.716927000 | -0.324166000 | 0.613026000 |
| 6 | -2.592739000 | 0.758163000  | 0.432328000 |
| 6 | -3.961341000 | 0.538718000  | 0.327265000 |

|    |              |              |              |
|----|--------------|--------------|--------------|
| 6  | -4.524677000 | -0.756164000 | 0.395911000  |
| 6  | -3.651243000 | -1.860565000 | 0.557721000  |
| 6  | -0.039533000 | -1.978772000 | 0.784594000  |
| 6  | -0.264382000 | -0.485660000 | 0.695497000  |
| 1  | -2.204351000 | 1.763656000  | 0.398995000  |
| 1  | -4.612876000 | 1.398234000  | 0.209904000  |
| 1  | -4.034160000 | -2.873472000 | 0.578666000  |
| 6  | 0.768376000  | 0.437396000  | 0.731242000  |
| 6  | 2.211509000  | 0.293957000  | 0.609743000  |
| 6  | 0.542636000  | 1.923094000  | 0.975740000  |
| 6  | 2.790944000  | 1.588079000  | 0.759555000  |
| 6  | 3.090627000  | -0.764897000 | 0.318502000  |
| 6  | 4.142884000  | 1.835864000  | 0.658802000  |
| 6  | 4.454100000  | -0.531398000 | 0.210091000  |
| 1  | 2.702129000  | -1.764312000 | 0.200131000  |
| 6  | 5.019346000  | 0.754380000  | 0.382170000  |
| 1  | 4.522370000  | 2.843667000  | 0.774633000  |
| 1  | 5.103183000  | -1.374937000 | -0.002472000 |
| 8  | -0.496591000 | 2.536014000  | 1.175147000  |
| 8  | 1.000304000  | -2.616051000 | 0.893605000  |
| 7  | 1.789299000  | 2.524771000  | 0.991422000  |
| 7  | -1.291197000 | -2.578713000 | 0.774787000  |
| 6  | -1.483059000 | -4.009887000 | 0.866541000  |
| 1  | -2.085011000 | -4.267533000 | 1.744773000  |
| 1  | -1.978694000 | -4.397778000 | -0.030457000 |
| 1  | -0.495987000 | -4.463214000 | 0.959045000  |
| 6  | 1.982686000  | 3.940635000  | 1.219198000  |
| 1  | 2.604962000  | 4.111633000  | 2.104307000  |
| 1  | 2.457180000  | 4.415762000  | 0.353412000  |
| 1  | 0.998367000  | 4.381033000  | 1.378961000  |
| 6  | -5.953853000 | -0.962857000 | 0.299785000  |
| 6  | -6.664308000 | -2.147039000 | 0.546721000  |
| 16 | -7.047139000 | 0.332333000  | -0.170917000 |
| 6  | -8.033481000 | -2.029813000 | 0.374318000  |
| 1  | -6.190935000 | -3.067116000 | 0.867075000  |
| 6  | -8.454543000 | -0.731039000 | -0.024638000 |
| 1  | -8.751023000 | -2.821774000 | 0.524362000  |
| 6  | 6.441996000  | 0.977027000  | 0.277934000  |
| 6  | 7.161023000  | 2.156509000  | 0.491362000  |
| 16 | 7.551923000  | -0.322736000 | -0.169551000 |
| 6  | 8.536422000  | 2.045283000  | 0.312047000  |
| 1  | 6.684758000  | 3.084482000  | 0.783848000  |
| 6  | 8.957953000  | 0.747400000  | -0.056575000 |
| 1  | 9.228442000  | 2.868734000  | 0.444644000  |

|    |               |              |              |
|----|---------------|--------------|--------------|
| 6  | -9.767533000  | -0.292887000 | -0.283087000 |
| 6  | -10.903430000 | -1.204466000 | -0.160419000 |
| 6  | -9.987097000  | 1.090464000  | -0.677029000 |
| 6  | -12.415533000 | 0.661262000  | -0.808520000 |
| 8  | -9.064444000  | 1.897603000  | -0.801119000 |
| 7  | -11.314500000 | 1.491857000  | -0.918195000 |
| 6  | -11.520086000 | 2.894318000  | -1.312974000 |
| 1  | -12.170311000 | 3.389816000  | -0.590721000 |
| 1  | -10.541845000 | 3.365797000  | -1.340150000 |
| 1  | -11.998809000 | 2.935977000  | -2.292292000 |
| 7  | -12.178322000 | -0.649618000 | -0.437216000 |
| 6  | -13.328296000 | -1.559730000 | -0.313418000 |
| 1  | -14.024279000 | -1.175900000 | 0.433814000  |
| 1  | -13.851617000 | -1.625663000 | -1.268333000 |
| 1  | -12.938858000 | -2.529324000 | -0.017755000 |
| 8  | -10.816781000 | -2.387248000 | 0.159702000  |
| 16 | -13.964809000 | 1.222297000  | -1.113677000 |
| 6  | 10.252039000  | 0.304551000  | -0.308230000 |
| 16 | 11.645217000  | 1.386249000  | -0.200080000 |
| 16 | 10.630285000  | -1.358164000 | -0.756156000 |
| 6  | 12.856563000  | 0.168936000  | -0.621382000 |
| 6  | 12.378577000  | -1.124124000 | -0.883833000 |
| 6  | 14.224244000  | 0.443165000  | -0.699657000 |
| 6  | 13.265573000  | -2.147883000 | -1.225478000 |
| 6  | 15.105635000  | -0.581439000 | -1.040974000 |
| 1  | 14.594041000  | 1.443129000  | -0.496535000 |
| 6  | 14.629238000  | -1.869391000 | -1.302368000 |
| 1  | 12.894825000  | -3.147593000 | -1.428045000 |
| 1  | 16.168667000  | -0.372242000 | -1.102691000 |
| 1  | 15.321682000  | -2.661769000 | -1.567340000 |

**S9TIIDTS7-T1** E=-3766.672638 Hartree

|   |              |              |              |
|---|--------------|--------------|--------------|
| 6 | 2.105828000  | -1.648783000 | -0.970795000 |
| 6 | 1.539517000  | -0.347578000 | -0.837336000 |
| 6 | 2.427974000  | 0.718880000  | -0.630101000 |
| 6 | 3.799050000  | 0.487559000  | -0.584145000 |
| 6 | 4.345634000  | -0.804271000 | -0.739633000 |
| 6 | 3.464129000  | -1.894602000 | -0.932299000 |
| 6 | -0.154402000 | -1.981893000 | -1.043409000 |
| 6 | 0.082805000  | -0.497462000 | -0.878834000 |
| 1 | 2.048312000  | 1.723625000  | -0.534141000 |
| 1 | 4.463420000  | 1.336924000  | -0.461944000 |
| 1 | 3.842925000  | -2.906535000 | -1.011620000 |



|    |              |              |              |
|----|--------------|--------------|--------------|
| 6  | -0.945146000 | 0.430476000  | -0.826903000 |
| 6  | -2.384564000 | 0.286428000  | -0.669955000 |
| 6  | -0.717942000 | 1.927495000  | -0.988035000 |
| 6  | -2.960692000 | 1.589889000  | -0.725623000 |
| 6  | -3.261771000 | -0.784020000 | -0.416422000 |
| 6  | -4.307473000 | 1.836983000  | -0.571311000 |
| 6  | -4.619856000 | -0.551543000 | -0.254526000 |
| 1  | -2.876139000 | -1.790309000 | -0.368327000 |
| 6  | -5.182461000 | 0.744723000  | -0.333799000 |
| 1  | -4.684028000 | 2.851394000  | -0.618419000 |
| 1  | -5.267319000 | -1.403315000 | -0.071874000 |
| 8  | 0.318407000  | 2.547556000  | -1.178811000 |
| 8  | -1.200880000 | -2.608313000 | -1.152404000 |
| 7  | -1.960993000 | 2.534288000  | -0.931307000 |
| 7  | 1.093159000  | -2.587632000 | -1.108653000 |
| 6  | 1.272412000  | -4.012215000 | -1.287162000 |
| 1  | 1.843215000  | -4.222647000 | -2.198159000 |
| 1  | 1.794866000  | -4.452641000 | -0.430536000 |
| 1  | 0.279799000  | -4.454817000 | -1.371978000 |
| 6  | -2.152030000 | 3.962263000  | -1.067536000 |
| 1  | -2.798510000 | 4.189216000  | -1.922175000 |
| 1  | -2.598254000 | 4.386258000  | -0.161122000 |
| 1  | -1.170024000 | 4.407093000  | -1.229223000 |
| 6  | 5.777535000  | -1.030595000 | -0.700747000 |
| 6  | 6.488436000  | -2.140693000 | -1.171344000 |
| 16 | 6.873182000  | 0.145957000  | -0.013880000 |
| 6  | 7.863083000  | -2.055031000 | -0.987720000 |
| 1  | 6.006389000  | -2.974918000 | -1.666018000 |
| 6  | 8.284930000  | -0.851967000 | -0.371091000 |
| 1  | 8.577522000  | -2.812264000 | -1.277151000 |
| 6  | -6.599462000 | 0.966559000  | -0.176095000 |
| 6  | -7.315259000 | 2.163085000  | -0.283552000 |
| 16 | -7.707651000 | -0.356362000 | 0.203277000  |
| 6  | -8.685780000 | 2.046795000  | -0.076977000 |
| 1  | -6.839436000 | 3.107590000  | -0.517959000 |
| 6  | -9.107987000 | 0.727450000  | 0.206329000  |
| 1  | -9.374612000 | 2.881830000  | -0.129929000 |
| 6  | 9.599687000  | -0.562685000 | 0.043580000  |
| 6  | 10.595171000 | -1.668041000 | 0.246100000  |
| 6  | 10.198831000 | 0.655804000  | 0.538606000  |
| 6  | 11.684552000 | -1.087607000 | 1.067614000  |
| 6  | 11.431956000 | 0.278077000  | 1.288922000  |
| 6  | 12.796836000 | -1.734370000 | 1.586294000  |
| 6  | 12.318753000 | 1.016625000  | 2.075691000  |

|    |               |              |              |
|----|---------------|--------------|--------------|
| 6  | 13.681193000  | -0.991609000 | 2.372947000  |
| 1  | 12.955242000  | -2.787759000 | 1.378652000  |
| 6  | 13.434711000  | 0.363842000  | 2.614437000  |
| 1  | 12.163438000  | 2.066310000  | 2.284364000  |
| 1  | 14.559343000  | -1.464822000 | 2.801300000  |
| 1  | 14.123590000  | 0.930115000  | 3.233863000  |
| 8  | 10.529210000  | -2.825572000 | -0.142600000 |
| 6  | 9.827507000   | 1.965717000  | 0.249785000  |
| 6  | 8.914091000   | 2.328908000  | -0.784701000 |
| 7  | 8.223320000   | 2.689863000  | -1.651151000 |
| 6  | 10.444354000  | 3.096325000  | 0.866150000  |
| 7  | 10.912076000  | 4.041235000  | 1.363396000  |
| 6  | -10.398301000 | 0.275407000  | 0.458100000  |
| 16 | -11.785566000 | 1.370183000  | 0.464267000  |
| 16 | -10.778260000 | -1.413330000 | 0.793262000  |
| 6  | -12.995280000 | 0.132650000  | 0.827230000  |
| 6  | -12.520926000 | -1.178884000 | 0.982616000  |
| 6  | -14.358353000 | 0.408620000  | 0.960397000  |
| 6  | -13.406973000 | -2.219519000 | 1.271649000  |
| 6  | -15.238828000 | -0.632866000 | 1.248901000  |
| 1  | -14.725322000 | 1.422917000  | 0.840089000  |
| 6  | -14.766060000 | -1.939241000 | 1.403638000  |
| 1  | -13.039059000 | -3.233527000 | 1.391381000  |
| 1  | -16.298298000 | -0.422392000 | 1.352994000  |
| 1  | -15.457770000 | -2.744684000 | 1.628032000  |

**S9TIIDTS8-T1** E=-4201.893435 Hartree

|   |              |              |              |
|---|--------------|--------------|--------------|
| 6 | -3.440335000 | 1.666501000  | -0.679471000 |
| 6 | -2.847325000 | 0.368955000  | -0.665986000 |
| 6 | -3.710267000 | -0.720317000 | -0.442508000 |
| 6 | -5.069978000 | -0.510291000 | -0.268666000 |
| 6 | -5.649544000 | 0.780980000  | -0.305926000 |
| 6 | -4.789186000 | 1.891425000  | -0.513047000 |
| 6 | -1.203320000 | 2.039565000  | -0.939707000 |
| 6 | -1.411767000 | 0.535434000  | -0.823330000 |
| 1 | -3.311587000 | -1.722563000 | -0.426840000 |
| 1 | -5.705767000 | -1.375313000 | -0.108752000 |
| 1 | -5.178951000 | 2.901782000  | -0.529118000 |
| 6 | -0.372541000 | -0.378505000 | -0.907280000 |
| 6 | 1.081902000  | -0.211847000 | -0.863378000 |
| 6 | -0.591991000 | -1.859022000 | -1.118848000 |
| 6 | 1.663888000  | -1.501377000 | -1.039403000 |
| 6 | 1.956822000  | 0.858870000  | -0.623696000 |

|    |              |              |              |
|----|--------------|--------------|--------------|
| 6  | 3.025571000  | -1.730878000 | -1.010956000 |
| 6  | 3.330839000  | 0.643530000  | -0.587530000 |
| 1  | 1.564481000  | 1.855188000  | -0.496074000 |
| 6  | 3.891964000  | -0.635786000 | -0.784733000 |
| 1  | 3.417997000  | -2.734779000 | -1.120699000 |
| 1  | 3.985211000  | 1.496967000  | -0.441718000 |
| 8  | -1.630900000 | -2.494402000 | -1.246357000 |
| 8  | -0.175215000 | 2.677542000  | -1.115168000 |
| 7  | 0.663117000  | -2.447381000 | -1.205284000 |
| 7  | -2.453343000 | 2.629081000  | -0.859917000 |
| 6  | -2.662492000 | 4.058139000  | -0.951925000 |
| 1  | -3.314871000 | 4.302882000  | -1.797088000 |
| 1  | -3.110434000 | 4.448675000  | -0.031464000 |
| 1  | -1.686693000 | 4.519899000  | -1.103327000 |
| 6  | 0.859472000  | -3.863607000 | -1.428747000 |
| 1  | 1.430528000  | -4.038216000 | -2.347073000 |
| 1  | 1.389172000  | -4.324004000 | -0.587301000 |
| 1  | -0.127840000 | -4.315463000 | -1.525498000 |
| 6  | -7.067608000 | 0.979316000  | -0.136249000 |
| 6  | -7.797377000 | 2.171849000  | -0.191168000 |
| 16 | -8.160054000 | -0.370802000 | 0.188718000  |
| 6  | -9.165218000 | 2.031433000  | 0.013498000  |
| 1  | -7.332605000 | 3.130910000  | -0.384943000 |
| 6  | -9.572099000 | 0.696323000  | 0.241592000  |
| 1  | -9.863402000 | 2.860231000  | -0.001548000 |
| 6  | 5.327453000  | -0.845964000 | -0.755036000 |
| 6  | 6.051608000  | -1.917031000 | -1.287382000 |
| 16 | 6.401953000  | 0.299027000  | 0.010222000  |
| 6  | 7.425444000  | -1.822276000 | -1.091466000 |
| 1  | 5.582962000  | -2.723491000 | -1.837129000 |
| 6  | 7.823321000  | -0.656638000 | -0.403519000 |
| 1  | 8.143821000  | -2.542550000 | -1.463326000 |
| 6  | 9.132711000  | -0.376713000 | 0.034385000  |
| 6  | 9.786523000  | 0.800817000  | 0.479300000  |
| 6  | 11.389590000 | -0.862349000 | 1.209461000  |
| 6  | 11.025762000 | 0.492090000  | 1.254323000  |
| 6  | 12.525468000 | -1.378766000 | 1.812192000  |
| 6  | 11.862723000 | 1.358519000  | 1.972532000  |
| 6  | 13.345363000 | -0.497595000 | 2.519433000  |
| 1  | 12.759903000 | -2.435453000 | 1.738728000  |
| 6  | 13.005675000 | 0.854885000  | 2.597325000  |
| 1  | 11.638002000 | 2.411469000  | 2.061364000  |
| 1  | 14.240320000 | -0.865473000 | 3.010657000  |
| 1  | 13.639937000 | 1.536913000  | 3.154690000  |

|    |               |              |              |
|----|---------------|--------------|--------------|
| 6  | 9.392144000   | 2.105101000  | 0.120190000  |
| 6  | 9.923979000   | 3.288839000  | 0.704266000  |
| 7  | 10.313401000  | 4.287300000  | 1.165927000  |
| 6  | 8.510142000   | 2.378920000  | -0.963969000 |
| 7  | 7.834423000   | 2.664594000  | -1.870509000 |
| 16 | 10.202014000  | -1.823925000 | 0.298883000  |
| 8  | 9.543104000   | -2.793376000 | 1.186498000  |
| 8  | 10.752942000  | -2.302236000 | -0.980279000 |
| 6  | -10.856507000 | 0.220167000  | 0.477168000  |
| 16 | -12.255445000 | 1.298038000  | 0.532348000  |
| 16 | -11.216814000 | -1.484922000 | 0.741869000  |
| 6  | -13.450234000 | 0.033547000  | 0.848707000  |
| 6  | -12.961065000 | -1.277952000 | 0.947724000  |
| 6  | -14.815590000 | 0.288937000  | 0.998526000  |
| 6  | -13.834410000 | -2.339449000 | 1.196812000  |
| 6  | -15.683352000 | -0.773271000 | 1.247032000  |
| 1  | -15.194042000 | 1.303240000  | 0.921857000  |
| 6  | -15.195798000 | -2.079708000 | 1.345594000  |
| 1  | -13.455049000 | -3.353431000 | 1.273032000  |
| 1  | -16.744565000 | -0.579007000 | 1.363955000  |
| 1  | -15.877808000 | -2.901249000 | 1.539128000  |

**S9TIIDTS10-T1** E=-4034.172116 Hartree

|   |              |              |              |
|---|--------------|--------------|--------------|
| 6 | -3.594355000 | -1.438206000 | 0.627382000  |
| 6 | -2.993604000 | -0.155387000 | 0.478318000  |
| 6 | -3.853878000 | 0.913859000  | 0.178631000  |
| 6 | -5.222471000 | 0.701101000  | 0.062251000  |
| 6 | -5.807905000 | -0.573198000 | 0.233552000  |
| 6 | -4.950621000 | -1.665978000 | 0.517202000  |
| 6 | -1.350205000 | -1.808502000 | 0.855227000  |
| 6 | -1.548262000 | -0.324916000 | 0.611591000  |
| 1 | -3.450751000 | 1.907356000  | 0.060599000  |
| 1 | -5.857880000 | 1.555404000  | -0.149654000 |
| 1 | -5.345918000 | -2.668977000 | 0.624206000  |
| 6 | -0.498983000 | 0.579391000  | 0.580236000  |
| 6 | 0.950176000  | 0.398779000  | 0.519230000  |
| 6 | -0.702683000 | 2.080156000  | 0.649615000  |
| 6 | 1.547612000  | 1.691471000  | 0.546155000  |
| 6 | 1.818403000  | -0.695459000 | 0.371840000  |
| 6 | 2.907515000  | 1.908235000  | 0.460395000  |
| 6 | 3.190845000  | -0.494282000 | 0.282093000  |
| 1 | 1.417848000  | -1.696742000 | 0.350735000  |
| 6 | 3.772090000  | 0.792343000  | 0.331418000  |

|    |               |              |              |
|----|---------------|--------------|--------------|
| 1  | 3.300799000   | 2.917671000  | 0.468815000  |
| 1  | 3.831842000   | -1.365556000 | 0.190099000  |
| 8  | -1.733921000  | 2.734313000  | 0.742219000  |
| 8  | -0.324287000  | -2.445917000 | 1.057714000  |
| 7  | 0.555968000   | 2.661625000  | 0.641027000  |
| 7  | -2.608762000  | -2.389855000 | 0.865647000  |
| 6  | -2.825647000  | -3.801522000 | 1.090526000  |
| 1  | -3.456707000  | -3.964795000 | 1.971232000  |
| 1  | -3.302416000  | -4.269631000 | 0.221746000  |
| 1  | -1.848856000  | -4.256629000 | 1.256051000  |
| 6  | 0.767420000   | 4.089989000  | 0.715025000  |
| 1  | 1.366611000   | 4.351589000  | 1.594276000  |
| 1  | 1.276157000   | 4.459471000  | -0.182688000 |
| 1  | -0.213813000  | 4.558679000  | 0.793490000  |
| 6  | -7.236522000  | -0.776203000 | 0.121929000  |
| 6  | -7.982908000  | -1.918595000 | 0.409520000  |
| 16 | -8.311780000  | 0.508982000  | -0.441330000 |
| 6  | -9.356161000  | -1.792601000 | 0.200136000  |
| 1  | -7.530967000  | -2.829024000 | 0.784801000  |
| 6  | -9.743374000  | -0.519101000 | -0.269601000 |
| 1  | -10.068193000 | -2.588412000 | 0.385903000  |
| 6  | 5.204296000   | 0.984594000  | 0.249438000  |
| 6  | 5.941727000   | 2.153599000  | 0.439106000  |
| 16 | 6.295888000   | -0.351453000 | -0.133906000 |
| 6  | 7.320675000   | 2.009237000  | 0.293563000  |
| 1  | 5.477861000   | 3.097752000  | 0.698610000  |
| 6  | 7.722970000   | 0.692479000  | -0.022652000 |
| 1  | 8.026895000   | 2.821851000  | 0.418321000  |
| 6  | -11.023942000 | -0.065835000 | -0.574447000 |
| 16 | -11.371493000 | 1.571026000  | -1.147787000 |
| 16 | -12.455681000 | -1.098665000 | -0.416865000 |
| 6  | -13.107130000 | 1.331703000  | -1.274880000 |
| 6  | -13.595289000 | 0.128919000  | -0.945084000 |
| 1  | -14.642127000 | -0.146200000 | -0.980290000 |
| 1  | -13.701402000 | 2.170462000  | -1.615424000 |
| 6  | 9.012190000   | 0.214031000  | -0.230803000 |
| 16 | 10.427112000  | 1.272178000  | -0.133707000 |
| 16 | 9.366420000   | -1.473026000 | -0.611660000 |
| 6  | 11.621338000  | 0.013329000  | -0.474632000 |
| 6  | 11.122111000  | -1.278951000 | -0.700505000 |
| 6  | 12.996319000  | 0.255028000  | -0.527143000 |
| 6  | 11.995895000  | -2.332586000 | -0.979518000 |
| 6  | 13.864513000  | -0.799652000 | -0.806088000 |
| 1  | 13.382282000  | 1.254270000  | -0.352101000 |

|   |              |              |              |
|---|--------------|--------------|--------------|
| 6 | 13.367199000 | -2.086250000 | -1.031068000 |
| 1 | 11.608688000 | -3.331481000 | -1.153676000 |
| 1 | 14.933097000 | -0.614670000 | -0.847386000 |
| 1 | 14.048582000 | -2.902714000 | -1.247497000 |
